# Supplementary material
Source: publisher site journal article supplement (https://www.dovepress.com/get_supplementary_file.php?f=491044.xlsx)
Supplement: Supplementary file 1 [file get_supplementary_file.php]

## Sheet: Sheet 1
ONTOLOGY	ID	Description	GeneRatio	BgRatio	pvalue	p.adjust	qvalue	geneID	Count
BP	GO:0022613	ribonucleoprotein complex biogenesis	248/2099	448/18800	1.43545e-119	7.09257e-116	5.90953e-116	LAS1L/RPUSD1/UTP18/STRAP/RPL26L1/MTREX/LSG1/NOP16/RRP12/MRTO4/NOP58/USP36/RIOK2/DDX20/WDR3/WDR18/RRP15/BUD23/NLE1/CLNS1A/SART3/EXOSC5/XRCC5/DDX1/HSP90AA1/MRPL22/GEMIN5/XPO1/NUFIP1/RPS5/WBP11/DIMT1/NOP14/DDX18/XRN2/ESF1/RPLP0/GEMIN2/SRPK1/HSP90AB1/SF3A1/SNRPD3/PES1/SNU13/PRMT5/EIF5/PRPF6/MTG2/CRNKL1/NOP56/SUV39H1/PIH1D1/ERCC2/POP4/RPS16/FBL/PRPF31/DDX49/GTPBP10/EIF4H/EXOSC3/EIF3A/NPM3/GTPBP4/NUP88…	248
BP	GO:0042254	ribosome biogenesis	190/2099	304/18800	2.23335e-104	5.51749e-101	4.59718e-101	LAS1L/RPUSD1/UTP18/RPL26L1/MTREX/LSG1/NOP16/RRP12/MRTO4/NOP58/USP36/RIOK2/WDR3/WDR18/RRP15/BUD23/NLE1/EXOSC5/XRCC5/MRPL22/XPO1/RPS5/WBP11/DIMT1/NOP14/DDX18/XRN2/ESF1/RPLP0/PES1/SNU13/MTG2/NOP56/SUV39H1/PIH1D1/ERCC2/POP4/RPS16/FBL/DDX49/GTPBP10/EXOSC3/NPM3/GTPBP4/NUP88/C1QBP/FTSJ3/UTP6/GAR1/FRG1/PAK1IP1/BYSL/BRIX1/RRP9/WDR75/NOL10/RPF1/EBNA1BP2/ERI3/UTP25/FASTKD2/HEATR1/FCF1/RCL1/WDR55/UTP20/TENT4…	190
BP	GO:0016072	rRNA metabolic process	159/2099	264/18800	9.94937e-84	1.63866e-80	1.36533e-80	LAS1L/RPUSD1/UTP18/DDX11/MTREX/RRP12/MRTO4/NOP58/USP36/RIOK2/WDR3/WDR18/RRP15/TCOF1/BUD23/EXOSC5/WBP11/DIMT1/NOP14/DDX18/XRN2/ESF1/SMARCB1/PES1/SNU13/NOP56/SUV39H1/PIH1D1/ERCC2/POP4/RPS16/FBL/DDX49/EXOSC3/NPM3/GTPBP4/FTSJ3/UTP6/GAR1/FRG1/BYSL/BRIX1/MACROH2A1/RRP9/NCL/GTF3C2/WDR75/TAF1B/NOL10/RPF1/EBNA1BP2/ERI3/UTP25/POLR1G/GTF3C3/HEATR1/FCF1/RCL1/WDR55/UTP20/TENT4B/RPL5/DDX54/EXOSC9/DDX27/RRP36/R…	159
BP	GO:0034470	ncRNA processing	203/2099	424/18800	3.43003e-82	4.23695e-79	3.53023e-79	LAS1L/ELAC2/RPUSD1/UTP18/SARS1/NSUN2/METTL1/MTREX/RRP12/MRTO4/NOP58/USP36/RIOK2/WDR3/WDR18/KARS1/RRP15/FTSJ1/ELP1/BUD23/HSD17B10/EXOSC5/DDX1/WBP11/DIMT1/SRRT/NOP14/RTRAF/METTL2A/DDX18/XRN2/ESF1/TRMT6/AARS1/PUS7/PES1/SNU13/RTCB/TRMU/ALKBH1/NOP56/CDK5RAP1/SUV39H1/POP1/PIH1D1/ERCC2/POP4/RPS16/FBL/DDX49/EXOSC3/NPM3/GTPBP4/FTSJ3/UTP6/GAR1/FRG1/PUS3/BYSL/BRIX1/RRP9/WDR75/NOL10/THADA/RPF1/EBNA1BP2/ERI3/…	203
BP	GO:0006364	rRNA processing	141/2099	226/18800	3.48684e-77	3.4457e-74	2.87096e-74	LAS1L/RPUSD1/UTP18/MTREX/RRP12/MRTO4/NOP58/USP36/RIOK2/WDR3/WDR18/RRP15/BUD23/EXOSC5/WBP11/DIMT1/NOP14/DDX18/XRN2/ESF1/PES1/SNU13/NOP56/SUV39H1/PIH1D1/ERCC2/POP4/RPS16/FBL/DDX49/EXOSC3/NPM3/GTPBP4/FTSJ3/UTP6/GAR1/FRG1/BYSL/BRIX1/RRP9/WDR75/NOL10/RPF1/EBNA1BP2/ERI3/UTP25/HEATR1/FCF1/RCL1/WDR55/UTP20/TENT4B/RPL5/DDX54/EXOSC9/DDX27/RRP36/RIOK1/RPP40/EMG1/METTL16/KRI1/NGDN/NSUN5/EXOSC2/DKC1/NOL11/RPL…	141
BP	GO:0006397	mRNA processing	193/2099	500/18800	4.43172e-59	3.64952e-56	3.04078e-56	KDM1A/PAF1/PTBP1/STRAP/MTREX/PTCD2/THOC3/THRAP3/SNRNP40/U2AF2/DDX20/YBX1/DHX8/GPKOW/PHRF1/JMJD6/DAZAP1/CPSF1/CLNS1A/SART3/SNRPA/DDX1/GEMIN5/WBP11/RBM22/SRRT/SF3B2/KHSRP/XRN2/RBM27/HNRNPC/GEMIN2/CWF19L1/SRPK1/CDC5L/HNRNPM/SF3A1/SNRPD3/SNU13/THOC5/PHF5A/RBM23/PRMT5/SNW1/ZC3H14/CSTF1/PRPF6/CRNKL1/RPRD1B/DHX35/CSTF2/PQBP1/HTATSF1/HNRNPL/PRPF31/SUGP1/BUD31/RBM28/LSM5/MTPAP/CASC3/C1QBP/EFTUD2/SUPT6H/FR…	193
BP	GO:0007059	chromosome segregation	155/2099	348/18800	2.74798e-57	1.93968e-54	1.61614e-54	CDC27/SLC25A5/BAZ1B/ZNF207/NCAPD2/BRCA1/DDX11/TACC3/MRE11/NCAPH2/SPDL1/RIOK2/NDC1/RAD18/TRIP13/SMC1A/NDE1/NUP37/SPAG5/KIF22/NDC80/SEH1L/ZW10/ANAPC5/NUDC/KIF4A/CDC6/CDC23/SRPK1/CCNB1IP1/CSNK2A1/CHMP4B/FAM83D/OIP5/ERCC2/CCNE1/SMC3/RAD51C/KPNB1/NCAPG/ANAPC15/FBXO5/TTK/IK/MACROH2A1/SMC4/ECT2/TTL/WRAP73/SFPQ/MAD2L2/CDC20/NEK2/CENPF/STAG1/KIF14/NCAPH/NAA50/KIF18A/ZWINT/CENPK/HJURP/MAD2L1BP/PCID2/DLGAP5…	155
BP	GO:0006260	DNA replication	131/2099	280/18800	1.60721e-51	9.92654e-49	8.27079e-49	UPF1/DBF4/DDX11/MRE11/RTF2/RFC2/RAD51/POLQ/POLD1/WDR18/MCM10/MCM2/TIPIN/MCM6/POLD3/EXD2/ORC1/ORC6/SUPT16H/CDC45/CDC6/CDC7/MCM5/POLE2/YY1/CINP/GINS1/ACTR5/POLA1/RBBP7/DNAJA3/CHRAC1/MCM4/CCNE1/GRWD1/LIG1/DNAJC2/SSBP1/RPA3/POLD2/TWNK/GTPBP4/SMC3/ZPR1/RFC5/TIMELESS/FBXO5/MCM3/GMNN/PPP2CA/UCHL5/SET/ZRANB3/ATF1/WRNIP1/DTD1/MGME1/DUT/GINS2/RPA1/PCNA/NASP/RFC3/ORC3/DHX9/ACTL6A/DSCC1/HMGA1/DNA2/SMARCAL1/B…	131
BP	GO:0048285	organelle fission	172/2099	493/18800	1.72544e-45	9.47267e-43	7.89263e-43	POLDIP2/CDC27/RALA/COX10/BAZ1B/ZNF207/NCAPD2/ANLN/TACC3/MRE11/NCAPH2/SPDL1/RAD51/RIOK2/NDC1/ASPM/MTFR1/KIF2A/TRIP13/SMC1A/NDE1/SPAG5/KIF22/NDC80/SEH1L/RAD54L/ZW10/AURKA/TPX2/ANAPC5/NUDC/KIF4A/CDC6/CDC23/AAAS/RANBP1/MIEF1/PRMT5/CCNB1IP1/MYBL2/CDC25B/KIF3B/CHMP4B/ACOT8/CCNE1/FZR1/BCCIP/SMC3/UBE2S/RAD51C/KPNB1/NCAPG/ANAPC15/RAD51AP1/FBXO5/TTK/IK/RAD1/MACROH2A1/SMC4/WRAP73/MAD2L2/CDC20/NEK2/CENPF/STA…	172
BP	GO:0008380	RNA splicing	160/2099	438/18800	2.7635e-45	1.36545e-42	1.13769e-42	KDM1A/PTBP1/STRAP/MTREX/THOC3/THRAP3/SNRNP40/U2AF2/DDX20/YBX1/DHX8/GPKOW/JMJD6/DAZAP1/CLNS1A/SART3/SNRPA/DDX1/GEMIN5/WBP11/RBM22/RTRAF/SF3B2/KHSRP/FUS/HNRNPC/GEMIN2/CWF19L1/SRPK1/CDC5L/HNRNPM/SF3A1/SNRPD3/SNU13/RTCB/THOC5/PHF5A/RBM23/PRMT5/SNW1/PRPF6/CRNKL1/DHX35/PQBP1/HTATSF1/HNRNPL/PRPF31/SUGP1/BUD31/RBM28/LSM5/CASC3/C1QBP/EFTUD2/SUPT6H/FRG1/DHX15/ZPR1/HSPA8/PRPF19/NUP98/MAGOHB/SRSF9/SRSF3/IK/P…	160
BP	GO:0098813	nuclear chromosome segregation	125/2099	287/18800	5.42454e-45	2.43661e-42	2.03018e-42	CDC27/BAZ1B/ZNF207/NCAPD2/DDX11/TACC3/MRE11/NCAPH2/SPDL1/RIOK2/NDC1/TRIP13/SMC1A/SPAG5/KIF22/NDC80/SEH1L/ZW10/ANAPC5/NUDC/KIF4A/CDC6/CDC23/CCNB1IP1/CHMP4B/FAM83D/CCNE1/SMC3/RAD51C/KPNB1/NCAPG/ANAPC15/FBXO5/TTK/IK/MACROH2A1/SMC4/ECT2/TTL/WRAP73/SFPQ/MAD2L2/CDC20/NEK2/CENPF/STAG1/KIF14/NCAPH/NAA50/KIF18A/ZWINT/CENPK/MAD2L1BP/PCID2/DLGAP5/KNSTRN/SGO1/TUBG1/PSMC3IP/TOP2A/RAN/SLF1/CCNB1/PSRC1/CDCA8/ES…	125
BP	GO:0000280	nuclear division	161/2099	446/18800	8.64569e-45	3.55986e-42	2.96608e-42	POLDIP2/CDC27/BAZ1B/ZNF207/NCAPD2/ANLN/TACC3/MRE11/NCAPH2/SPDL1/RAD51/RIOK2/NDC1/ASPM/KIF2A/TRIP13/SMC1A/NDE1/SPAG5/KIF22/NDC80/SEH1L/RAD54L/ZW10/AURKA/TPX2/ANAPC5/NUDC/KIF4A/CDC6/CDC23/AAAS/RANBP1/PRMT5/CCNB1IP1/MYBL2/CDC25B/KIF3B/CHMP4B/CCNE1/FZR1/BCCIP/SMC3/UBE2S/RAD51C/KPNB1/NCAPG/ANAPC15/RAD51AP1/FBXO5/TTK/IK/RAD1/MACROH2A1/SMC4/WRAP73/MAD2L2/CDC20/NEK2/CENPF/STAG1/KIF14/MASTL/NCAPH/NAA50/KI…	161
BP	GO:0140014	mitotic nuclear division	126/2099	293/18800	1.28937e-44	4.90059e-42	4.08317e-42	POLDIP2/CDC27/BAZ1B/ZNF207/NCAPD2/ANLN/TACC3/NCAPH2/SPDL1/RIOK2/KIF2A/TRIP13/SMC1A/NDE1/SPAG5/KIF22/NDC80/SEH1L/ZW10/AURKA/TPX2/ANAPC5/NUDC/KIF4A/CDC6/CDC23/AAAS/RANBP1/PRMT5/MYBL2/KIF3B/CHMP4B/BCCIP/SMC3/UBE2S/KPNB1/NCAPG/ANAPC15/FBXO5/TTK/IK/MACROH2A1/SMC4/WRAP73/MAD2L2/CDC20/NEK2/CENPF/STAG1/KIF14/NCAPH/NAA50/KIF18A/ZWINT/CENPK/MAD2L1BP/PCID2/DLGAP5/PKMYT1/KNSTRN/SGO1/CEP85/TUBG1/RAN/SLF1/CCNB…	126
BP	GO:0006261	DNA-templated DNA replication	90/2099	159/18800	1.79537e-44	6.33639e-42	5.27948e-42	UPF1/DBF4/DDX11/MRE11/RTF2/RFC2/RAD51/POLQ/POLD1/WDR18/MCM10/MCM2/TIPIN/MCM6/POLD3/EXD2/ORC1/ORC6/CDC45/CDC6/CDC7/MCM5/POLE2/GINS1/POLA1/DNAJA3/MCM4/CCNE1/LIG1/SSBP1/POLD2/TWNK/ZPR1/RFC5/TIMELESS/FBXO5/MCM3/GMNN/ZRANB3/WRNIP1/MGME1/GINS2/RPA1/PCNA/RFC3/ORC3/DSCC1/HMGA1/DNA2/SMARCAL1/BRCA2/POLG/TICRR/PRIM2/MMS22L/GINS4/TERF1/POLE3/EME1/DONSON/TONSL/RECQL4/LRWD1/DBF4B/TOPBP1/RFC4/ORC5/STOML2/DDX21/…	90
BP	GO:0000819	sister chromatid segregation	103/2099	205/18800	2.75547e-44	9.07651e-42	7.56255e-42	CDC27/BAZ1B/ZNF207/NCAPD2/DDX11/TACC3/MRE11/NCAPH2/SPDL1/RIOK2/TRIP13/SMC1A/SPAG5/KIF22/NDC80/SEH1L/ZW10/ANAPC5/NUDC/KIF4A/CDC6/CDC23/CHMP4B/SMC3/RAD51C/KPNB1/NCAPG/ANAPC15/FBXO5/TTK/IK/MACROH2A1/SMC4/WRAP73/SFPQ/MAD2L2/CDC20/NEK2/CENPF/STAG1/KIF14/NCAPH/NAA50/KIF18A/ZWINT/CENPK/MAD2L1BP/PCID2/DLGAP5/KNSTRN/SGO1/TUBG1/TOP2A/RAN/SLF1/CCNB1/PSRC1/CDCA8/ESPL1/SMC2/DSCC1/KIF23/CENPE/KATNB1/KIF2C/NUF2…	103
BP	GO:0000375	RNA splicing, via transesterification reactions	133/2099	325/18800	4.09086e-44	1.26331e-41	1.05259e-41	KDM1A/PTBP1/STRAP/MTREX/THRAP3/SNRNP40/U2AF2/DDX20/DHX8/GPKOW/JMJD6/DAZAP1/CLNS1A/SART3/SNRPA/DDX1/GEMIN5/WBP11/RBM22/SF3B2/KHSRP/HNRNPC/GEMIN2/CWF19L1/SRPK1/CDC5L/HNRNPM/SF3A1/SNRPD3/SNU13/PHF5A/RBM23/PRMT5/SNW1/PRPF6/CRNKL1/DHX35/PQBP1/HTATSF1/HNRNPL/PRPF31/BUD31/LSM5/CASC3/C1QBP/EFTUD2/FRG1/HSPA8/PRPF19/NUP98/MAGOHB/SRSF9/SRSF3/IK/FXR1/NCL/SF3B6/SRSF7/SFPQ/BCAS2/PRDX6/SMNDC1/KHDRBS1/HNRNPA2B1/…	133
BP	GO:0000070	mitotic sister chromatid segregation	93/2099	171/18800	6.64401e-44	1.93106e-41	1.60896e-41	CDC27/BAZ1B/ZNF207/NCAPD2/TACC3/NCAPH2/SPDL1/RIOK2/TRIP13/SMC1A/SPAG5/KIF22/NDC80/SEH1L/ZW10/ANAPC5/NUDC/KIF4A/CDC6/CDC23/CHMP4B/SMC3/KPNB1/NCAPG/ANAPC15/FBXO5/TTK/IK/MACROH2A1/SMC4/WRAP73/MAD2L2/CDC20/NEK2/CENPF/KIF14/NCAPH/NAA50/KIF18A/ZWINT/CENPK/MAD2L1BP/PCID2/DLGAP5/KNSTRN/SGO1/TUBG1/RAN/SLF1/CCNB1/PSRC1/CDCA8/ESPL1/SMC2/DSCC1/KIF23/CENPE/KATNB1/KIF2C/NUF2/DYNC1LI1/BOD1/CDCA5/NCAPG2/DSN1/NCA…	93
BP	GO:0000377	RNA splicing, via transesterification reactions with bulged adenosine as nucleophile	131/2099	321/18800	2.65947e-43	6.91602e-41	5.76243e-41	KDM1A/PTBP1/STRAP/MTREX/THRAP3/SNRNP40/U2AF2/DDX20/DHX8/GPKOW/JMJD6/DAZAP1/CLNS1A/SART3/SNRPA/DDX1/GEMIN5/WBP11/RBM22/SF3B2/HNRNPC/GEMIN2/CWF19L1/SRPK1/CDC5L/HNRNPM/SF3A1/SNRPD3/SNU13/PHF5A/RBM23/PRMT5/SNW1/PRPF6/CRNKL1/DHX35/PQBP1/HTATSF1/HNRNPL/PRPF31/BUD31/LSM5/CASC3/C1QBP/EFTUD2/FRG1/HSPA8/PRPF19/NUP98/MAGOHB/SRSF9/SRSF3/IK/FXR1/NCL/SF3B6/SRSF7/SFPQ/BCAS2/PRDX6/KHDRBS1/HNRNPA2B1/SMU1/DDX39A/S…	131
BP	GO:0000398	mRNA splicing, via spliceosome	131/2099	321/18800	2.65947e-43	6.91602e-41	5.76243e-41	KDM1A/PTBP1/STRAP/MTREX/THRAP3/SNRNP40/U2AF2/DDX20/DHX8/GPKOW/JMJD6/DAZAP1/CLNS1A/SART3/SNRPA/DDX1/GEMIN5/WBP11/RBM22/SF3B2/HNRNPC/GEMIN2/CWF19L1/SRPK1/CDC5L/HNRNPM/SF3A1/SNRPD3/SNU13/PHF5A/RBM23/PRMT5/SNW1/PRPF6/CRNKL1/DHX35/PQBP1/HTATSF1/HNRNPL/PRPF31/BUD31/LSM5/CASC3/C1QBP/EFTUD2/FRG1/HSPA8/PRPF19/NUP98/MAGOHB/SRSF9/SRSF3/IK/FXR1/NCL/SF3B6/SRSF7/SFPQ/BCAS2/PRDX6/KHDRBS1/HNRNPA2B1/SMU1/DDX39A/S…	131
BP	GO:0006403	RNA localization	95/2099	196/18800	3.18327e-39	7.86427e-37	6.55251e-37	UPF1/NUP160/NSUN2/THOC3/NOP58/NDC1/YBX1/NUP133/NUP37/XPO1/SEH1L/RTRAF/KHSRP/NUP50/AAAS/NUP188/POLDIP3/THOC5/YY1/RAE1/PRPF6/NUP93/PIH1D1/FBL/CASC3/KPNB1/NUP88/SUPT6H/NUP98/NUP107/CPSF6/SRSF3/MRPL18/NUP155/CCT4/SRSF7/SMG7/GLE1/TCP1/ENY2/KHDRBS1/HNRNPA2B1/DDX39A/XPO5/NUP153/UPF3B/NUP85/PCID2/DKC1/RAN/EIF5A/NXT1/HNRNPA1/CCT7/DHX9/SRSF1/NCBP1/PNPT1/LRPPRC/SSB/NUP54/WRAP53/POLR2D/NAF1/NHP2/CCT6A/TERF1/…	95
BP	GO:0006399	tRNA metabolic process	92/2099	185/18800	3.45095e-39	8.11959e-37	6.76525e-37	ELAC2/LARS2/SARS1/NSUN2/METTL1/KARS1/IARS2/FTSJ1/ELP1/HSD17B10/DDX1/RTRAF/METTL2A/TRMT6/AARS1/PUS7/RTCB/TRMU/ALKBH1/CDK5RAP1/EARS2/POP1/POP4/GARS1/EXOSC3/PUS3/CARS1/TARS1/RARS1/GTF3C2/THADA/FARSB/DARS2/GTF3C3/METTL8/EXOSC9/MOCS3/AARS2/RPP40/GTF3C4/DTD1/TRMT5/DTD2/GTPBP3/QRSL1/EXOSC2/LRRC47/LARS1/NARS1/ANKRD16/YARS1/NAT10/EPRS1/NARS2/SSB/YARS2/DUS3L/TARS2/TPRKB/FARS2/GTF3C5/RPP30/QTRT2/WDR4/POLR3K…	92
BP	GO:0033044	regulation of chromosome organization	99/2099	212/18800	4.80446e-39	1.07904e-36	8.99054e-37	CDC27/UPF1/BAZ1B/ZNF207/NCAPD2/DDX11/TACC3/MNAT1/MRE11/SPDL1/RIOK2/TRIP13/XRCC1/MCM2/XRCC5/NDC80/ZW10/MAPKAPK5/ANAPC5/HNRNPC/CDC6/CDC23/YY1/ACTR5/SSBP1/NCAPG/ANAPC15/FBXO5/TTK/IK/MACROH2A1/SMC4/CCT4/SFPQ/MAD2L2/UCHL5/NEK2/CENPF/YLPM1/TCP1/NCAPH/TENT4B/HNRNPA2B1/ZWINT/MAD2L1BP/PCID2/DLGAP5/GNL3L/TRIM28/DNMT1/DKC1/TOP2A/SLF1/MORC2/CCNB1/NAT10/ESPL1/HNRNPA1/CCT7/ACTL6A/SMC2/MYC/HNRNPD/CENPE/NABP2/PI…	99
BP	GO:0140053	mitochondrial gene expression	65/2099	104/18800	3.93068e-36	8.44412e-34	7.03564e-34	ELAC2/LARS2/IARS2/HSD17B10/NOA1/MTIF2/MRPS18A/ALKBH1/MTG2/CDK5RAP1/EARS2/GARS1/TWNK/TFAM/C1QBP/MRPL51/MRPS27/DARS2/FASTKD2/MRPS14/MRPS2/FASTKD3/AARS2/MRPS7/TRMT5/MTERF1/MRPS12/QRSL1/PTCD3/MRPL44/TBRG4/TACO1/MRPL47/PNPT1/LRPPRC/FASTKD1/YARS2/TARS2/MRPS28/SUPV3L1/MALSU1/RPUSD3/TFB2M/GFM2/RPUSD4/MRPL16/TRUB2/MRPL58/GFM1/HARS1/TRMT61B/SLC25A33/TEFM/TRMT10C/PUS1/TUFM/MRPS11/MRPS16/SHMT2/MRPS18B/FASTKD…	65
BP	GO:0051052	regulation of DNA metabolic process	150/2099	472/18800	2.34321e-34	4.82407e-32	4.01942e-32	KDM1A/UPF1/DBF4/BRCA1/DDX11/MRE11/ERCC8/RFC2/RAD51/POLQ/TMEM161A/XRCC1/TIPIN/XRCC5/RIF1/HSP90AA1/MAPKAPK5/FUS/HNRNPC/CDC6/MSH2/HSP90AB1/CDC7/PRMT5/YY1/GINS1/MRGBP/ACTR5/CHRAC1/ERCC2/DNAJC2/SSBP1/EXOSC3/GTPBP4/SMC3/SUPT6H/NSD2/PTGES3/FOXM1/RAD51AP1/RFC5/TIMELESS/FBXO5/RNF8/GMNN/SUB1/PPP2CA/CCT4/MSH6/MAD2L2/UCHL5/NEK2/YLPM1/TCP1/TENT4B/ZRANB3/HNRNPA2B1/ATF1/WRNIP1/DEK/YEATS4/AUNIP/GNL3L/TRIM28/DKC1…	150
BP	GO:0006302	double-strand break repair	106/2099	273/18800	6.25523e-33	1.23628e-30	1.03007e-30	KDM1A/PPP5C/BRCA1/DDX11/MRE11/TDP1/ERCC8/RAD51/POLQ/TRIP13/XRCC1/MCM2/MCM6/XRCC5/DDX1/RIF1/EXD2/PALB2/RAD54L/FUS/CDC45/MSH2/CDC7/MCM5/YY1/MRGBP/ACTR5/POLA1/MCM4/PIAS4/RPA3/RAD51C/NSD2/PRPF19/FOXM1/RAD51AP1/TIMELESS/MCM3/RNF8/PSMD14/SFPQ/MAD2L2/DCLRE1B/DEK/AP5S1/MCM8/YEATS4/AUNIP/PARP2/GINS2/RPA1/FIGNL1/SLF1/RNF138/BRIP1/ACTL6A/APTX/DNA2/SMARCAL1/NABP2/BRCA2/WRAP53/PARP1/FANCD2/MMS22L/CDCA5/GINS4/…	106
BP	GO:0071826	ribonucleoprotein complex subunit organization	88/2099	208/18800	8.25774e-31	1.56929e-28	1.30753e-28	STRAP/MRTO4/DDX20/DHX8/NLE1/CLNS1A/SART3/XRCC5/DDX1/HSP90AA1/GEMIN5/NUFIP1/RPS5/RPLP0/GEMIN2/SRPK1/HSP90AB1/SF3A1/SNRPD3/SNU13/PRMT5/EIF5/PRPF6/CRNKL1/ZFAND1/PIH1D1/PRPF31/EIF4H/EIF3A/PRPF19/PTGES3/CPSF6/SRSF9/BRIX1/FASTKD2/RPL5/SNRPC/MRPS7/SNRPD2/SNRPB/EIF2S2/LSM4/EIF2S3/AAR2/TRAF7/ERAL1/DHX9/SRSF1/NCBP1/TGS1/SNRPF/DENR/TXNL4A/SNRPG/SNRNP200/POLR2D/NAF1/CELF1/CPSF7/GEMIN6/VCP/NUDT21/SNRPD1/SF1/U…	88
BP	GO:0032543	mitochondrial translation	49/2099	72/18800	3.84785e-30	6.79009e-28	5.6575e-28	LARS2/IARS2/NOA1/MTIF2/MRPS18A/ALKBH1/MTG2/CDK5RAP1/EARS2/GARS1/C1QBP/MRPL51/MRPS27/DARS2/FASTKD2/MRPS14/MRPS2/FASTKD3/AARS2/MRPS7/MRPS12/QRSL1/PTCD3/MRPL44/TACO1/MRPL47/LRPPRC/YARS2/TARS2/MRPS28/MALSU1/RPUSD3/GFM2/RPUSD4/MRPL16/TRUB2/MRPL58/GFM1/HARS1/TRMT10C/TUFM/MRPS11/MRPS16/SHMT2/MRPS18B/MRPS17/MPV17L2/GATC/RCC1L	49
BP	GO:0042273	ribosomal large subunit biogenesis	49/2099	72/18800	3.84785e-30	6.79009e-28	5.6575e-28	LAS1L/RPL26L1/NOP16/MRTO4/RRP15/NLE1/DDX18/RPLP0/PES1/SNU13/GTPBP4/FTSJ3/PAK1IP1/BRIX1/RPF1/EBNA1BP2/FASTKD2/RPL5/TRAF7/NIP7/WDR74/RSL24D1/WDR12/URB1/NVL/NHP2/RPL7L1/RPL7/HEATR3/NIFK/MALSU1/NOL9/NSA2/MRPL1/RSL1D1/ZNF622/RRS1/NPM1/DDX28/RPL35A/NOC2L/RPF2/RPL23A/SDAD1/RPL10A/EIF6/MRPL20/BOP1/ZNHIT3	49
BP	GO:0022618	ribonucleoprotein complex assembly	85/2099	200/18800	5.67747e-30	9.67323e-28	8.05973e-28	STRAP/MRTO4/DDX20/NLE1/CLNS1A/SART3/XRCC5/DDX1/HSP90AA1/GEMIN5/NUFIP1/RPS5/RPLP0/GEMIN2/SRPK1/HSP90AB1/SF3A1/SNRPD3/SNU13/PRMT5/EIF5/PRPF6/CRNKL1/PIH1D1/PRPF31/EIF4H/EIF3A/PRPF19/PTGES3/CPSF6/SRSF9/BRIX1/FASTKD2/RPL5/SNRPC/MRPS7/SNRPD2/SNRPB/EIF2S2/LSM4/EIF2S3/AAR2/TRAF7/ERAL1/DHX9/SRSF1/NCBP1/TGS1/SNRPF/DENR/TXNL4A/SNRPG/SNRNP200/POLR2D/NAF1/CELF1/CPSF7/GEMIN6/NUDT21/SNRPD1/SF1/USP39/PRPF8/DDX23…	85
BP	GO:0007051	spindle organization	82/2099	188/18800	6.42011e-30	1.05739e-27	8.8102e-28	POLDIP2/ZNF207/TACC3/INTS13/ASPM/KIF2A/SMC1A/WDR62/SPAG5/NDC80/AURKA/TPX2/NUDC/KIF4A/AAAS/MYBL2/RAE1/KIF3B/MAPRE1/CHMP4B/FSD1/BCCIP/SMC3/KPNB1/FBXO5/TTK/CEP72/WRAP73/CDC20/NEK2/STAG1/GPSM2/STIL/DLGAP5/AUNIP/KNSTRN/HAUS8/TUBG1/RAN/CCNB1/PSRC1/ESPL1/BORA/KIF23/HAUS2/TUBGCP4/KIF11/CENPE/NUF2/HAUS6/NTMT1/RPS3/INCENP/CENPJ/HAUS1/SPC25/CENPH/HNRNPU/CCSAP/CCNB2/PCNT/RACGAP1/KIF15/WASHC5/VCP/PLK1/SAC3D1/…	82
BP	GO:1901987	regulation of cell cycle phase transition	130/2099	415/18800	3.46142e-29	5.51706e-27	4.59682e-27	CDC27/DBF4/PAF1/ZNF207/ANLN/BRCA1/MNAT1/MRE11/NSUN2/SPDL1/RIOK2/TRIP13/TIPIN/GTSE1/RBL1/NDC80/ORC1/ZW10/AURKA/ANAPC5/TFAP4/WDR76/CLSPN/CDC45/CDC6/CDC23/MSH2/CDC5L/CDC7/THOC5/APEX1/CDC25B/E2F1/FAM83D/ERCC2/DOT1L/FZR1/EZH2/RAD51C/PRPF19/ANAPC15/TIMELESS/FBXO5/TTK/IK/RAD1/PPP2CA/MACROH2A1/EIF4G1/MAD2L2/CENPF/KIF14/CPSF3/ZWINT/STIL/MAD2L1BP/PCID2/DLGAP5/PSME3/MEN1/CCNB1/CDK7/RINT1/CDK4/ESPL1/BRIP1/MD…	130
BP	GO:0044772	mitotic cell cycle phase transition	134/2099	440/18800	1.07722e-28	1.6633e-26	1.38586e-26	CDC27/DBF4/ZNF207/ANLN/BRCA1/TACC3/MNAT1/MRE11/SPDL1/CUL1/RIOK2/TAF2/TRIP13/GTSE1/RBL1/NDC80/ORC1/ZW10/AURKA/ANAPC5/TFAP4/CLSPN/CDC6/CDC23/CDC7/CDKN3/APEX1/CDC25B/E2F1/CHMP4B/CDK16/GSPT1/ERCC2/CCNE1/FZR1/EZH2/CUL2/UBE2S/RAD51C/ZPR1/ANAPC15/FOXM1/FBXO5/TTK/IK/PPP2CA/EIF4G1/MAD2L2/CENPF/KIF14/CPSF3/MASTL/KHDRBS1/ZWINT/CIT/STIL/CKS2/MAD2L1BP/PCID2/DLGAP5/PKMYT1/PSME3/NASP/CCNB1/CDK7/RINT1/CDK4/ESPL1…	134
BP	GO:0042274	ribosomal small subunit biogenesis	48/2099	74/18800	4.24895e-28	6.36184e-26	5.30069e-26	RIOK2/WDR3/XRCC5/RPS5/NOP14/SNU13/ERCC2/RPS16/UTP6/BYSL/NOL10/UTP25/HEATR1/RCL1/UTP20/RRP36/RIOK1/RPP40/MRPS7/EMG1/KRI1/NGDN/NOL11/UTP3/ERAL1/NAT10/LTV1/UTP4/NOB1/NOM1/UTP23/DHX37/SRFBP1/WDR43/DCAF13/BMS1/TSR1/RPS21/RPS7/RRS1/NPM1/MRPS11/TBL3/RRP7A/NOP9/WDR46/PRKDC/DDX52	48
BP	GO:0071103	DNA conformation change	57/2099	103/18800	6.54171e-28	9.50664e-26	7.92093e-26	UPF1/DDX11/MNAT1/MRE11/HMGB3/RFC2/RAD51/POLQ/MCM2/MCM6/XRCC5/DDX1/RAD54L/CDC45/MCM5/CHD8/GINS1/MCM4/ERCC2/SSBP1/TWNK/RFC5/MCM3/ZRANB3/HNRNPA2B1/WRNIP1/MCM8/MTERF1/GINS2/TOP2A/RPA1/RFC3/DHX9/BRIP1/DSCC1/HMGA1/DNA2/PIF1/G3BP1/GINS4/SUPV3L1/RECQL4/ERCC3/RFC4/HMGB2/MCM7/RUVBL1/TOP3A/GINS3/RUVBL2/TOP1MT/ERCC6L/FANCM/HMGB1/XRCC6/BLM/TOP1	57
BP	GO:0006310	DNA recombination	109/2099	324/18800	1.53953e-27	2.17338e-25	1.81086e-25	KDM1A/BRCA1/MRE11/HMGB3/RAD51/POLQ/TRIP13/TCF3/XRCC1/MCM2/MCM6/UNG/XRCC5/RIF1/EXD2/PALB2/RAD54L/FUS/CDC45/MSH2/CDC7/MCM5/YY1/CCNB1IP1/APEX1/MRGBP/ACTR5/MCM4/ERCC2/RPA3/EXOSC3/RAD51C/SUPT6H/NSD2/RAD51AP1/TIMELESS/MCM3/RNF8/PSMD14/MSH6/SFPQ/MAD2L2/UCHL5/ZRANB3/HROB/AP5S1/MCM8/YEATS4/AUNIP/GINS2/PSMC3IP/TOP2A/RPA1/FIGNL1/RNF138/BRIP1/ACTL6A/NABP2/BRCA2/PIF1/WRAP53/PARP1/TPRKB/HSPD1/FANCD2/MMS22L/NON…	109
BP	GO:0032392	DNA geometric change	54/2099	96/18800	5.45897e-27	7.49243e-25	6.2427e-25	UPF1/DDX11/MNAT1/MRE11/HMGB3/RFC2/RAD51/POLQ/MCM2/MCM6/XRCC5/DDX1/RAD54L/CDC45/MCM5/CHD8/GINS1/MCM4/ERCC2/SSBP1/TWNK/RFC5/MCM3/ZRANB3/HNRNPA2B1/WRNIP1/MCM8/MTERF1/GINS2/TOP2A/RPA1/RFC3/DHX9/BRIP1/DSCC1/HMGA1/DNA2/PIF1/G3BP1/GINS4/SUPV3L1/RECQL4/ERCC3/RFC4/HMGB2/MCM7/RUVBL1/GINS3/RUVBL2/ERCC6L/FANCM/HMGB1/XRCC6/BLM	54
BP	GO:0000723	telomere maintenance	64/2099	132/18800	7.86678e-27	1.05053e-24	8.75306e-25	UPF1/MRE11/RAD51/XRCC1/XRCC5/RIF1/HSP90AA1/MAPKAPK5/HNRNPC/HSP90AB1/APEX1/CCNE1/RPA3/RAD51C/GAR1/PTGES3/CCT4/NEK2/DCLRE1B/YLPM1/TCP1/TENT4B/HNRNPA2B1/GNL3L/DKC1/RPA1/PCNA/NAT10/HNRNPA1/CCT7/MYC/DNA2/SMARCAL1/HNRNPD/NABP2/BRCA2/PIF1/WRAP53/PARP1/TPRKB/NAF1/NHP2/CCT6A/TERF1/CCT5/HNRNPU/CCT8/NSMCE2/RECQL4/SMC6/CCT3/CCT2/FEN1/EXOSC10/EXO1/CCNE2/AURKB/RAD51D/XRCC6/BLM/DCLRE1A/SMG5/PRKDC/PINX1	64
BP	GO:0051236	establishment of RNA localization	71/2099	162/18800	3.1325e-26	4.07308e-24	3.39369e-24	UPF1/NUP160/NSUN2/THOC3/NDC1/YBX1/NUP133/NUP37/XPO1/SEH1L/RTRAF/KHSRP/NUP50/AAAS/NUP188/POLDIP3/THOC5/RAE1/NUP93/KPNB1/NUP88/SUPT6H/NUP98/NUP107/CPSF6/SRSF3/MRPL18/NUP155/SRSF7/SMG7/GLE1/ENY2/KHDRBS1/HNRNPA2B1/DDX39A/XPO5/NUP153/UPF3B/NUP85/PCID2/RAN/EIF5A/NXT1/HNRNPA1/DHX9/SRSF1/NCBP1/PNPT1/LRPPRC/SSB/NUP54/POLR2D/TERF1/CETN3/AHCTF1/NUP205/NUP35/SLBP/PHAX/NOL6/SNUPN/HNRNPA3/TOMM20/CKAP5/NPM1/ALY…	71
BP	GO:0050657	nucleic acid transport	70/2099	159/18800	5.04187e-26	6.22797e-24	5.18914e-24	UPF1/NUP160/NSUN2/THOC3/NDC1/YBX1/NUP133/NUP37/XPO1/SEH1L/RTRAF/KHSRP/NUP50/AAAS/NUP188/POLDIP3/THOC5/RAE1/NUP93/KPNB1/NUP88/SUPT6H/NUP98/NUP107/CPSF6/SRSF3/MRPL18/NUP155/SRSF7/SMG7/GLE1/ENY2/KHDRBS1/HNRNPA2B1/DDX39A/XPO5/NUP153/UPF3B/NUP85/PCID2/RAN/EIF5A/NXT1/HNRNPA1/DHX9/SRSF1/NCBP1/PNPT1/LRPPRC/SSB/NUP54/POLR2D/CETN3/AHCTF1/NUP205/NUP35/SLBP/PHAX/NOL6/SNUPN/HNRNPA3/TOMM20/CKAP5/NPM1/ALYREF/XP…	70
BP	GO:0050658	RNA transport	70/2099	159/18800	5.04187e-26	6.22797e-24	5.18914e-24	UPF1/NUP160/NSUN2/THOC3/NDC1/YBX1/NUP133/NUP37/XPO1/SEH1L/RTRAF/KHSRP/NUP50/AAAS/NUP188/POLDIP3/THOC5/RAE1/NUP93/KPNB1/NUP88/SUPT6H/NUP98/NUP107/CPSF6/SRSF3/MRPL18/NUP155/SRSF7/SMG7/GLE1/ENY2/KHDRBS1/HNRNPA2B1/DDX39A/XPO5/NUP153/UPF3B/NUP85/PCID2/RAN/EIF5A/NXT1/HNRNPA1/DHX9/SRSF1/NCBP1/PNPT1/LRPPRC/SSB/NUP54/POLR2D/CETN3/AHCTF1/NUP205/NUP35/SLBP/PHAX/NOL6/SNUPN/HNRNPA3/TOMM20/CKAP5/NPM1/ALYREF/XP…	70
BP	GO:0090305	nucleic acid phosphodiester bond hydrolysis	89/2099	244/18800	1.57017e-25	1.89225e-23	1.57662e-23	LAS1L/ELAC2/ANGEL1/MRE11/TDP1/POLD1/NTHL1/CPSF1/EXOSC5/DDX1/EXD2/NOP14/XRN2/ALKBH1/APEX1/CSTF2/POP1/ERCC2/POP4/EXOSC3/NEIL3/CPSF6/RAD1/ERI3/PPP1R8/DCLRE1B/CPSF3/RCL1/UTP20/ZRANB3/PMS2/EXOSC9/AGO2/RRP36/RPP40/MGME1/KRI1/EXOSC2/TOE1/MRPL44/NCBP1/APTX/PNPT1/DBR1/DNA2/POLG/NOB1/ISG20L2/FIP1L1/G3BP1/NHP2/UTP23/TATDN1/RPP30/RPS3/CPSF7/EME1/CPSF4/POLR3K/NOL9/ERCC3/BMS1/CPSF2/NUDT21/TSR1/FEN1/APEX2/TSEN3…	89
BP	GO:0007346	regulation of mitotic cell cycle	135/2099	478/18800	2.29825e-25	2.70372e-23	2.25274e-23	POLDIP2/CDC27/PAFAH1B1/ZNF207/ANLN/BRCA1/MNAT1/MRE11/SPDL1/RIOK2/INTS13/TRIP13/NLE1/TIPIN/GTSE1/WDR62/RBL1/NDC80/ORC1/ZW10/AURKA/ANAPC5/TFAP4/CLSPN/CDC6/CDC23/MSH2/CDC7/TTLL12/PRMT5/APEX1/CDC25B/E2F1/ERCC2/FZR1/RPA3/EZH2/RAD51C/YWHAE/ANAPC15/FBXO5/GMNN/TTK/IK/PPP2CA/EIF4G1/TTL/MAD2L2/NEK2/CENPF/KIF14/CPSF3/ZWINT/STIL/CKS2/MAD2L1BP/PCID2/DLGAP5/PKMYT1/PSME3/THAP1/CCNB1/CDK7/RINT1/CDK4/ESPL1/BORA/M…	135
BP	GO:1902850	microtubule cytoskeleton organization involved in mitosis	67/2099	151/18800	3.31739e-25	3.81192e-23	3.17609e-23	POLDIP2/PAFAH1B1/ZNF207/TACC3/SPDL1/INTS13/KIF2A/SMC1A/NDE1/WDR62/NDC80/ZW10/AURKA/TPX2/NUDC/KIF4A/AAAS/MYBL2/RAE1/KIF3B/CHMP4B/FSD1/BCCIP/SMC3/KPNB1/TTK/CENPA/WRAP73/CDC20/NEK2/STAG1/GPSM2/STIL/DLGAP5/TUBG1/RAN/CCNB1/PSRC1/ESPL1/BORA/KIF23/KIF11/CENPE/NUF2/SPC25/CENPH/HNRNPU/CCSAP/PCNT/RACGAP1/KIF15/MAD2L1/VCP/PLK1/DCTN2/CKAP5/AURKB/RCC1/CHEK2/DRG1/SAPCD2/DYNC1H1/DCTN1/MZT1/NUP62/KIFC1/LSM14A	67
BP	GO:0140694	non-membrane-bounded organelle assembly	116/2099	379/18800	3.55751e-25	3.99492e-23	3.32857e-23	POLDIP2/ZNF207/ANLN/BRCA1/MRTO4/ASPM/KIF2A/SMC1A/NLE1/WDR62/SPAG5/XRCC5/NDC80/MRPL22/RPS5/OGFOD1/AURKA/TPX2/RPLP0/KIF4A/AAAS/MYBL2/KIF3B/MAPRE1/CHMP4B/CEP76/SQLE/BCCIP/SMC3/KPNB1/C1QBP/FBXO5/CEP72/BRIX1/CENPA/AUP1/WRAP73/CDC20/NEK2/CENPF/STAG1/FASTKD2/GPSM2/MRPS2/RPL5/CENPK/STIL/MRPS7/DLGAP5/LSM4/HAUS8/TRAF7/ERAL1/NIP7/EIF2S1/KIF23/HAUS2/TUBGCP4/KIF11/CENPE/PLK4/UBAP2L/EIF2A/G3BP1/HAUS6/RPS3/INCE…	116
BP	GO:0006417	regulation of translation	131/2099	463/18800	1.01319e-24	1.11249e-22	9.26923e-23	UPF1/YBX1/ELAVL1/TCOF1/EXOSC5/DDX1/PUM3/GEMIN5/MTIF2/EIF2AK1/OGFOD1/CNOT3/KHSRP/MAPKAPK5/GCN1/AARS1/PUS7/POLDIP3/EIF3D/ALKBH1/EIF5/PCIF1/MTG2/CDK5RAP1/GSPT1/EIF3E/AKT2/EIF3B/EIF4H/EXOSC3/CASC3/C1QBP/GAPDH/HBS1L/MRPS27/FXR1/EIF4G1/NCL/EIF2B4/DPH5/FASTKD2/GLE1/EIF2B2/ETF1/PAIP2/TARDBP/TENT4B/KHDRBS1/RPL5/EXOSC9/AGO2/FASTKD3/UPF3B/TRAP1/METTL16/FXR2/ILF3/NGDN/NSUN5/EXOSC2/EIF2S3/PTCD3/EEFSEC/EIF5A/D…	131
BP	GO:0030490	maturation of SSU-rRNA	37/2099	51/18800	1.17748e-24	1.26477e-22	1.0538e-22	RIOK2/WDR3/NOP14/SNU13/ERCC2/RPS16/UTP6/BYSL/NOL10/UTP25/HEATR1/RCL1/UTP20/RRP36/RIOK1/RPP40/KRI1/NGDN/NOL11/UTP3/NAT10/UTP4/NOB1/UTP23/DHX37/SRFBP1/WDR43/DCAF13/BMS1/TSR1/RPS21/RRS1/MRPS11/TBL3/NOP9/WDR46/DDX52	37
BP	GO:0006913	nucleocytoplasmic transport	101/2099	308/18800	1.28106e-24	1.31869e-22	1.09873e-22	UPF1/NUP160/NSUN2/LSG1/THOC3/RIOK2/TNPO3/IPO5/ELAVL1/NUP133/XPO1/TNPO1/IPO11/RBM22/NUP50/AAAS/NUP188/HSP90AB1/POLDIP3/THOC5/RANGAP1/DESI1/RAE1/EMD/NUP93/AXIN1/TNPO2/KPNB1/NUP88/YWHAE/SUPT6H/ZPR1/NUP98/NUP107/CPSF6/SRSF3/HSPA9/TMCO6/NUP155/ECT2/SUMO1/PARK7/SMG7/IPO13/GLE1/ENY2/FAM53C/TARDBP/KHDRBS1/HNRNPA2B1/DDX39A/CSE1L/XPO5/NUP153/UPF3B/NUP85/MED1/PCID2/XPO7/TRIM28/RAN/NXT1/HNRNPA1/LTV1/DHX9/NCB…	101
BP	GO:0051169	nuclear transport	101/2099	308/18800	1.28106e-24	1.31869e-22	1.09873e-22	UPF1/NUP160/NSUN2/LSG1/THOC3/RIOK2/TNPO3/IPO5/ELAVL1/NUP133/XPO1/TNPO1/IPO11/RBM22/NUP50/AAAS/NUP188/HSP90AB1/POLDIP3/THOC5/RANGAP1/DESI1/RAE1/EMD/NUP93/AXIN1/TNPO2/KPNB1/NUP88/YWHAE/SUPT6H/ZPR1/NUP98/NUP107/CPSF6/SRSF3/HSPA9/TMCO6/NUP155/ECT2/SUMO1/PARK7/SMG7/IPO13/GLE1/ENY2/FAM53C/TARDBP/KHDRBS1/HNRNPA2B1/DDX39A/CSE1L/XPO5/NUP153/UPF3B/NUP85/MED1/PCID2/XPO7/TRIM28/RAN/NXT1/HNRNPA1/LTV1/DHX9/NCB…	101
BP	GO:1903311	regulation of mRNA metabolic process	98/2099	294/18800	1.57702e-24	1.59022e-22	1.32497e-22	UPF1/PAF1/PTBP1/PTCD2/THRAP3/U2AF2/YBX1/ELAVL1/JMJD6/DAZAP1/SNRPA/EXOSC5/CNOT3/KHSRP/FUS/HNRNPC/SRPK1/HNRNPM/RBM23/SNW1/ZC3H14/APEX1/E2F1/HNRNPL/EXOSC3/CASC3/C1QBP/SUPT6H/HSPA8/PRPF19/NUP98/CPSF6/SRSF9/SRSF3/FXR1/NCL/SRSF7/PRDX6/FASTKD2/TARDBP/TENT4B/KHDRBS1/HNRNPA2B1/SMU1/EXOSC9/AGO2/FASTKD3/PCID2/METTL16/FXR2/EXOSC2/SYNCRIP/HNRNPA1/DHX9/TBRG4/TRA2B/NCBP1/PNPT1/FASTKD1/HNRNPD/EIF4A3/NT5C3B/SERBP…	98
BP	GO:0007052	mitotic spindle organization	59/2099	124/18800	2.67643e-24	2.64485e-22	2.20369e-22	POLDIP2/ZNF207/TACC3/INTS13/KIF2A/SMC1A/WDR62/NDC80/AURKA/TPX2/NUDC/KIF4A/AAAS/MYBL2/RAE1/KIF3B/CHMP4B/FSD1/BCCIP/SMC3/KPNB1/TTK/WRAP73/CDC20/NEK2/STAG1/GPSM2/STIL/DLGAP5/TUBG1/RAN/CCNB1/PSRC1/BORA/KIF23/KIF11/CENPE/NUF2/SPC25/CENPH/HNRNPU/CCSAP/PCNT/RACGAP1/KIF15/VCP/PLK1/DCTN2/CKAP5/AURKB/RCC1/CHEK2/DRG1/DYNC1H1/DCTN1/MZT1/NUP62/KIFC1/LSM14A	59
BP	GO:0015931	nucleobase-containing compound transport	81/2099	218/18800	5.88291e-24	5.6995e-22	4.74883e-22	UPF1/SLC25A5/NUP160/NSUN2/THOC3/NDC1/YBX1/NUP133/NUP37/SLC35C2/XPO1/SEH1L/RTRAF/KHSRP/NUP50/AAAS/NUP188/POLDIP3/THOC5/SLC25A17/RAE1/NUP93/KPNB1/NUP88/SUPT6H/NUP98/NUP107/CPSF6/SRSF3/MRPL18/NUP155/SRSF7/SMG7/GLE1/ENY2/SLC35B1/KHDRBS1/HNRNPA2B1/DDX39A/XPO5/NUP153/UPF3B/NUP85/SLC25A19/PCID2/RAN/EIF5A/NXT1/HNRNPA1/DHX9/SRSF1/NCBP1/PNPT1/LRPPRC/SSB/NUP54/POLR2D/CETN3/AHCTF1/NUP205/SLC35B2/NUP35/SLBP/P…	81
BP	GO:0071897	DNA biosynthetic process	75/2099	194/18800	1.64017e-23	1.55848e-21	1.29852e-21	POLDIP2/SPRTN/MRE11/RFC2/POLQ/POLD1/POLD3/XRCC5/HSP90AA1/MAPKAPK5/HNRNPC/HSP90AB1/POLE2/GINS1/POLA1/USP10/CHRAC1/LIG1/DNAJC2/POLD2/GAR1/PTGES3/RFC5/CCT4/MAD2L2/NEK2/CENPF/TCP1/TENT4B/HNRNPA2B1/WRNIP1/HROB/GNL3L/DKC1/GINS2/RPA1/PCNA/RFC3/MEN1/NAT10/HNRNPA1/CCT7/DSCC1/MYC/HNRNPD/PIF1/POLG/WRAP53/DTL/NVL/NAF1/NHP2/CCT6A/GINS4/TERF1/POLE3/CHEK1/CCT5/HNRNPU/CCT8/CCT3/RFC4/VCP/CCT2/PCLAF/TK1/EXOSC10/TY…	75
BP	GO:0000725	recombinational repair	68/2099	164/18800	1.73455e-23	1.61706e-21	1.34733e-21	KDM1A/BRCA1/MRE11/RAD51/POLQ/XRCC1/MCM2/MCM6/RIF1/EXD2/PALB2/RAD54L/FUS/CDC45/CDC7/MCM5/YY1/MRGBP/MCM4/RPA3/RAD51C/RAD51AP1/TIMELESS/MCM3/PSMD14/SFPQ/MAD2L2/HROB/AP5S1/MCM8/YEATS4/AUNIP/GINS2/RPA1/FIGNL1/RNF138/ACTL6A/NABP2/BRCA2/WRAP53/PARP1/MMS22L/GINS4/CHEK1/MMS19/NSMCE2/UBQLN4/TONSL/RECQL4/SMC6/RAD21/MCM7/RFWD3/FEN1/RHNO1/RUVBL1/TOP3A/UBE2N/GEN1/FANCB/RUVBL2/RAD51D/PARPBP/KDM4D/FANCM/H2AX/XRC…	68
BP	GO:0000075	cell cycle checkpoint signaling	69/2099	170/18800	3.60147e-23	3.29535e-21	2.74568e-21	ZNF207/BRCA1/MRE11/NSUN2/SPDL1/TRIP13/TIPIN/GTSE1/NDC80/ORC1/ZW10/WDR76/CLSPN/CDC45/CDC6/MSH2/CDC5L/THOC5/E2F1/DOT1L/FZR1/PRPF19/ANAPC15/TIMELESS/TTK/IK/RAD1/MAD2L2/CENPF/ZWINT/MAD2L1BP/PCID2/CCNB1/RINT1/BRIP1/MDC1/DNA2/NABP2/CUL4A/TICRR/TIPRL/DTL/INTS7/FANCD2/DYNC1LI1/CHEK1/RAD17/EME1/BUB1B/DONSON/NAE1/TOPBP1/ATRIP/MAD2L1/PLK1/CDT1/RFWD3/BUB1/CDK1/TRIAP1/RHNO1/ZWILCH/GEN1/AURKB/CHEK2/BRCC3/H2AX/…	69
BP	GO:0072594	establishment of protein localization to organelle	122/2099	431/18800	4.145e-23	3.72371e-21	3.1026e-21	M6PR/RALA/AGK/MIPEP/HSPA5/USP36/TNPO3/AP3D1/IPO5/ELAVL1/NUP133/TIMM21/HSP90AA1/TNPO1/DNAJA1/IPO11/RBM22/HUWE1/NUP50/NUP188/HSP90AB1/TIMM13/TOMM22/SAMM50/TIMM9/SRP54/CHMP4B/UBL4A/NUP93/PIH1D1/SGTA/TIMM44/PDCD5/TIMM50/TNPO2/PMPCB/KPNB1/NUP88/GRPEL1/ZPR1/HSPA8/NUP98/NUP107/TMCO6/NUP155/MACROH2A1/ECT2/SSR3/HTRA2/CCT4/SUMO1/MFN2/IPO13/TCP1/FAM53C/TARDBP/CSE1L/NUP153/NUP85/MED1/TIMM8A/TOMM40/TRIM28/DKC…	122
BP	GO:0032508	DNA duplex unwinding	48/2099	90/18800	8.93677e-23	7.8851e-21	6.56987e-21	UPF1/DDX11/MNAT1/MRE11/RFC2/RAD51/POLQ/MCM2/MCM6/XRCC5/DDX1/RAD54L/CDC45/MCM5/CHD8/GINS1/MCM4/ERCC2/SSBP1/TWNK/RFC5/MCM3/WRNIP1/MCM8/GINS2/TOP2A/RPA1/RFC3/DHX9/BRIP1/DSCC1/HMGA1/DNA2/PIF1/G3BP1/GINS4/SUPV3L1/RECQL4/ERCC3/RFC4/MCM7/RUVBL1/GINS3/RUVBL2/ERCC6L/FANCM/XRCC6/BLM	48
BP	GO:0006413	translational initiation	56/2099	120/18800	1.30247e-22	1.12903e-20	9.4071e-21	DHX33/EIF2B3/DDX1/RPS5/EIF3I/MTIF2/EIF2AK1/EIF3L/EIF3D/ALKBH1/EIF5/EIF3J/EIF3E/EIF3B/EIF4H/EIF3A/EIF2B1/EIF4G1/EIF2B4/GLE1/EIF2B2/PAIP2/COPS5/KHDRBS1/AGO2/EIF2S2/EIF2S3/EIF3G/EIF2S1/BZW2/NCBP1/DENR/POLR2D/EIF2A/EIF2B5/EIF3H/EIF3M/RPS3/YTHDF1/CDC123/LARP1/SLBP/ABCE1/POLR2G/PPP1CA/EIF1AX/EIF1/EIF1AD/EIF3F/RPS6KB2/EIF3K/NPM1/EIF3C/EIF4EBP1/MTOR/EIF6	56
BP	GO:0006401	RNA catabolic process	92/2099	280/18800	1.33787e-22	1.13973e-20	9.49623e-21	UPF1/ELAC2/NSUN2/MTREX/MRTO4/THRAP3/YBX1/ELAVL1/EXOSC5/CNOT3/KHSRP/XRN2/FUS/HNRNPC/HNRNPM/ZC3H14/APEX1/E2F1/GSPT1/POP1/EIF3E/DDX49/LSM5/EXOSC3/MTPAP/CASC3/ZPR1/MAGOHB/FXR1/SMG7/PPP1R8/FASTKD2/SLIRP/ETF1/TARDBP/TENT4B/ZCCHC17/EXOSC9/AGO2/FASTKD3/UPF3B/PCID2/METTL16/FXR2/LSM4/EXOSC2/DKC1/SYNCRIP/DHX9/MRPL44/TBRG4/NCBP1/PNPT1/LRPPRC/DNA2/SSB/FASTKD1/HNRNPD/EIF4A3/NT5C3B/SERBP1/POLR2D/NAF1/CELF1/YTHD…	92
BP	GO:0051983	regulation of chromosome segregation	48/2099	91/18800	1.68866e-22	1.40593e-20	1.17142e-20	CDC27/ZNF207/TACC3/SPDL1/RIOK2/RAD18/TRIP13/NDC80/ZW10/ANAPC5/CDC6/CDC23/CSNK2A1/ANAPC15/FBXO5/TTK/IK/MAD2L2/CENPF/ZWINT/MAD2L1BP/PCID2/DLGAP5/CCNB1/ESPL1/CENPE/KIF2C/DYNC1LI1/MKI67/ANAPC1/HNRNPU/NSMCE2/BUB1B/SMC6/MAD2L1/PTTG1/RAD21/PLK1/CDT1/BUB1/ZWILCH/UBE2C/CDC26/GEN1/AURKB/RCC2/CDCA2/ANAPC7	48
BP	GO:1901990	regulation of mitotic cell cycle phase transition	100/2099	321/18800	1.70726e-22	1.40593e-20	1.17142e-20	CDC27/ZNF207/ANLN/BRCA1/MNAT1/MRE11/SPDL1/RIOK2/TRIP13/GTSE1/RBL1/NDC80/ORC1/ZW10/AURKA/ANAPC5/TFAP4/CLSPN/CDC6/CDC23/CDC7/APEX1/CDC25B/E2F1/ERCC2/FZR1/EZH2/RAD51C/ANAPC15/FBXO5/TTK/IK/PPP2CA/EIF4G1/MAD2L2/CENPF/KIF14/CPSF3/ZWINT/STIL/MAD2L1BP/PCID2/DLGAP5/PSME3/CCNB1/CDK7/RINT1/CDK4/ESPL1/CENPE/NABP2/CUL4A/TICRR/RPTOR/DTL/DYNC1LI1/CDCA5/MEPCE/CHEK1/CENPJ/RAD17/NSMCE2/SASS6/BUB1B/CDC25C/DONSON/NA…	100
BP	GO:0051306	mitotic sister chromatid separation	41/2099	68/18800	2.06714e-22	1.67438e-20	1.3951e-20	CDC27/ZNF207/TACC3/NCAPH2/SPDL1/RIOK2/TRIP13/NDC80/ZW10/ANAPC5/CDC6/CDC23/ANAPC15/FBXO5/TTK/IK/MAD2L2/CENPF/ZWINT/MAD2L1BP/PCID2/DLGAP5/CCNB1/ESPL1/CENPE/DYNC1LI1/ANAPC1/NSMCE2/BUB1B/MAD2L1/PTTG1/RAD21/PLK1/CDT1/BUB1/ZWILCH/UBE2C/CDC26/GEN1/AURKB/ANAPC7	41
BP	GO:0010965	regulation of mitotic sister chromatid separation	40/2099	65/18800	2.26225e-22	1.80287e-20	1.50215e-20	CDC27/ZNF207/TACC3/SPDL1/RIOK2/TRIP13/NDC80/ZW10/ANAPC5/CDC6/CDC23/ANAPC15/FBXO5/TTK/IK/MAD2L2/CENPF/ZWINT/MAD2L1BP/PCID2/DLGAP5/CCNB1/ESPL1/CENPE/DYNC1LI1/ANAPC1/NSMCE2/BUB1B/MAD2L1/PTTG1/RAD21/PLK1/CDT1/BUB1/ZWILCH/UBE2C/CDC26/GEN1/AURKB/ANAPC7	40
BP	GO:0007091	metaphase/anaphase transition of mitotic cell cycle	39/2099	62/18800	2.36757e-22	1.85685e-20	1.54713e-20	CDC27/ZNF207/TACC3/SPDL1/RIOK2/TRIP13/NDC80/ZW10/ANAPC5/CDC6/CDC23/ANAPC15/FBXO5/TTK/IK/MAD2L2/CENPF/ZWINT/MAD2L1BP/PCID2/DLGAP5/CCNB1/ESPL1/CENPE/DYNC1LI1/ANAPC1/NSMCE2/BUB1B/MAD2L1/RAD21/PLK1/CDT1/BUB1/ZWILCH/UBE2C/CDC26/GEN1/AURKB/ANAPC7	39
BP	GO:0000724	double-strand break repair via homologous recombination	66/2099	162/18800	2.50132e-22	1.90139e-20	1.58424e-20	KDM1A/BRCA1/MRE11/RAD51/POLQ/XRCC1/MCM2/MCM6/RIF1/EXD2/PALB2/RAD54L/FUS/CDC45/CDC7/MCM5/YY1/MRGBP/MCM4/RPA3/RAD51C/RAD51AP1/TIMELESS/MCM3/PSMD14/SFPQ/MAD2L2/AP5S1/MCM8/YEATS4/AUNIP/GINS2/RPA1/FIGNL1/RNF138/ACTL6A/NABP2/BRCA2/WRAP53/PARP1/MMS22L/GINS4/CHEK1/MMS19/NSMCE2/UBQLN4/TONSL/RECQL4/SMC6/RAD21/MCM7/RFWD3/FEN1/RUVBL1/TOP3A/UBE2N/GEN1/FANCB/RUVBL2/RAD51D/PARPBP/KDM4D/FANCM/H2AX/XRCC2/BLM	66
BP	GO:0032200	telomere organization	66/2099	162/18800	2.50132e-22	1.90139e-20	1.58424e-20	UPF1/MRE11/RAD51/XRCC1/XRCC5/RIF1/HSP90AA1/MAPKAPK5/HNRNPC/HSP90AB1/APEX1/DOT1L/CCNE1/RPA3/EZH2/RAD51C/GAR1/PTGES3/CCT4/NEK2/DCLRE1B/YLPM1/TCP1/TENT4B/HNRNPA2B1/GNL3L/DKC1/RPA1/PCNA/NAT10/HNRNPA1/CCT7/MYC/DNA2/SMARCAL1/HNRNPD/NABP2/BRCA2/PIF1/WRAP53/PARP1/TPRKB/NAF1/NHP2/CCT6A/TERF1/CCT5/HNRNPU/CCT8/NSMCE2/RECQL4/SMC6/CCT3/CCT2/FEN1/EXOSC10/EXO1/CCNE2/AURKB/RAD51D/XRCC6/BLM/DCLRE1A/SMG5/PRKDC/PIN…	66
BP	GO:0034655	nucleobase-containing compound catabolic process	115/2099	405/18800	5.75913e-22	4.31149e-20	3.59233e-20	UPF1/ELAC2/NSUN2/MTREX/MRTO4/THRAP3/NTHL1/YBX1/ELAVL1/ACAT1/UNG/EXOSC5/CNOT3/KHSRP/XRN2/FUS/HNRNPC/ACOT7/HNRNPM/ZC3H14/APEX1/E2F1/GSPT1/POP1/EIF3E/DDX49/NUDT1/LSM5/EXOSC3/MTPAP/CASC3/ZPR1/MAGOHB/FXR1/SMG7/PPP1R8/FASTKD2/SLIRP/ETF1/TARDBP/TENT4B/ZCCHC17/EXOSC9/AGO2/FASTKD3/UPF3B/ITPA/PCID2/METTL16/DUT/MBD4/FXR2/LSM4/EXOSC2/DKC1/SYNCRIP/DHX9/MRPL44/NUDT15/TBRG4/NCBP1/PNPT1/LRPPRC/DNA2/SSB/FASTKD1/H…	115
BP	GO:0031123	RNA 3'-end processing	54/2099	117/18800	1.43325e-21	1.05697e-19	8.80668e-20	PAF1/ELAC2/CPSF1/HSD17B10/SNRPA/EXOSC5/ZC3H14/CSTF1/RPRD1B/CSTF2/FBL/EXOSC3/MTPAP/CPSF6/ERI3/CPSF3/TENT4B/EXOSC9/SYMPK/EXOSC2/DKC1/TOE1/NCBP1/PNPT1/SSB/INTS14/INTS12/ZNF473/INTS7/POLR2D/FIP1L1/CPSF7/RNF20/SUPV3L1/SSU72/CPSF4/POLR3K/SLBP/INTS1/VIRMA/CPSF2/LEO1/NUDT21/EXOSC10/RPS21/CLP1/TRMT10C/CSTF3/EXOSC4/INTS5/HSF1/SUPT5H/CTR9/NELFE	54
BP	GO:0008033	tRNA processing	56/2099	125/18800	1.54223e-21	1.12061e-19	9.33693e-20	ELAC2/SARS1/NSUN2/METTL1/KARS1/FTSJ1/ELP1/HSD17B10/DDX1/RTRAF/METTL2A/TRMT6/AARS1/PUS7/RTCB/TRMU/ALKBH1/CDK5RAP1/POP1/POP4/PUS3/THADA/METTL8/MOCS3/AARS2/RPP40/TRMT5/GTPBP3/ANKRD16/NAT10/SSB/DUS3L/TPRKB/FARS2/RPP30/QTRT2/WDR4/POLR3K/RPUSD4/TRMT61A/ELP5/TSEN34/TRMT61B/TP53RK/POP7/CLP1/TRMT10C/CTU2/PUS1/TSEN54/TRMT12/LAGE3/KTI12/TSEN15/TYW1/METTL6	56
BP	GO:0044784	metaphase/anaphase transition of cell cycle	39/2099	65/18800	2.83263e-21	2.02841e-19	1.69007e-19	CDC27/ZNF207/TACC3/SPDL1/RIOK2/TRIP13/NDC80/ZW10/ANAPC5/CDC6/CDC23/ANAPC15/FBXO5/TTK/IK/MAD2L2/CENPF/ZWINT/MAD2L1BP/PCID2/DLGAP5/CCNB1/ESPL1/CENPE/DYNC1LI1/ANAPC1/NSMCE2/BUB1B/MAD2L1/RAD21/PLK1/CDT1/BUB1/ZWILCH/UBE2C/CDC26/GEN1/AURKB/ANAPC7	39
BP	GO:0051168	nuclear export	63/2099	156/18800	3.90145e-21	2.75387e-19	2.29452e-19	UPF1/NUP160/NSUN2/LSG1/THOC3/RIOK2/NUP133/XPO1/RBM22/NUP188/POLDIP3/THOC5/RANGAP1/DESI1/RAE1/EMD/NUP93/NUP88/YWHAE/SUPT6H/NUP107/CPSF6/SRSF3/HSPA9/NUP155/PARK7/SMG7/GLE1/ENY2/KHDRBS1/HNRNPA2B1/DDX39A/CSE1L/XPO5/NUP153/NUP85/PCID2/XPO7/RAN/NXT1/HNRNPA1/LTV1/DHX9/NCBP1/ANP32B/SSB/RITA1/POLR2D/ABCE1/PHAX/NOL6/XPO6/RRS1/CALR/NPM1/ALYREF/XPOT/NOP9/SDAD1/SMG5/NUP62/EIF6/POM121C	63
BP	GO:0033045	regulation of sister chromatid segregation	41/2099	72/18800	4.29752e-21	2.94917e-19	2.45725e-19	CDC27/ZNF207/TACC3/SPDL1/RIOK2/TRIP13/NDC80/ZW10/ANAPC5/CDC6/CDC23/ANAPC15/FBXO5/TTK/IK/MAD2L2/CENPF/ZWINT/MAD2L1BP/PCID2/DLGAP5/CCNB1/ESPL1/CENPE/DYNC1LI1/ANAPC1/HNRNPU/NSMCE2/BUB1B/MAD2L1/PTTG1/RAD21/PLK1/CDT1/BUB1/ZWILCH/UBE2C/CDC26/GEN1/AURKB/ANAPC7	41
BP	GO:1905818	regulation of chromosome separation	41/2099	72/18800	4.29752e-21	2.94917e-19	2.45725e-19	CDC27/ZNF207/TACC3/SPDL1/RIOK2/TRIP13/NDC80/ZW10/ANAPC5/CDC6/CDC23/CSNK2A1/ANAPC15/FBXO5/TTK/IK/MAD2L2/CENPF/ZWINT/MAD2L1BP/PCID2/DLGAP5/CCNB1/ESPL1/CENPE/DYNC1LI1/ANAPC1/NSMCE2/BUB1B/MAD2L1/PTTG1/RAD21/PLK1/CDT1/BUB1/ZWILCH/UBE2C/CDC26/GEN1/AURKB/ANAPC7	41
BP	GO:0051054	positive regulation of DNA metabolic process	86/2099	263/18800	4.71703e-21	3.19272e-19	2.66017e-19	DBF4/BRCA1/DDX11/MRE11/RFC2/RAD51/TMEM161A/XRCC1/XRCC5/RIF1/HSP90AA1/MAPKAPK5/FUS/MSH2/HSP90AB1/CDC7/GINS1/MRGBP/ERCC2/SSBP1/EXOSC3/NSD2/PTGES3/FOXM1/RAD51AP1/RFC5/TIMELESS/RNF8/CCT4/MAD2L2/NEK2/TCP1/HNRNPA2B1/ATF1/YEATS4/TRIM28/DKC1/GINS2/PCNA/RFC3/SLF1/HNRNPA1/CCT7/DHX9/ACTL6A/DSCC1/MYC/DNA2/HNRNPD/NABP2/WRAP53/NVL/PARP1/NAF1/PRIM2/CCT6A/GINS4/RPS3/CCT5/MMS19/CCT8/PAXIP1/DBF4B/CCT3/RFC4/STOML2/…	86
BP	GO:0034502	protein localization to chromosome	47/2099	93/18800	4.95478e-21	3.30832e-19	2.75649e-19	SPDL1/XRCC5/NDC80/ZW10/MSH2/PIH1D1/EZH2/TTK/IK/MACROH2A1/CENPA/CCT4/TCP1/MCM8/GNL3L/DKC1/RPA1/SLF1/CCT7/KNL1/NABP2/BRCA2/WRAP53/BOD1/CDCA5/CCT6A/TERF1/CCT5/XRCC4/CCT8/LRWD1/CCT3/RAD21/VCP/CCT2/PLK1/CDT1/CDK1/ESCO2/MTBP/ZWILCH/HASPIN/AURKB/RCC2/RUVBL2/CHAMP1/PINX1	47
BP	GO:0051304	chromosome separation	48/2099	97/18800	6.04639e-21	3.98336e-19	3.31894e-19	CDC27/ZNF207/TACC3/NCAPH2/SPDL1/RIOK2/TRIP13/NDC80/ZW10/ANAPC5/CDC6/CDC23/CSNK2A1/ANAPC15/FBXO5/TTK/IK/MAD2L2/CENPF/NCAPH/ZWINT/MAD2L1BP/PCID2/DLGAP5/TOP2A/CCNB1/ESPL1/CENPE/DYNC1LI1/ANAPC1/EME1/NSMCE2/BUB1B/MAD2L1/PTTG1/RAD21/PLK1/CDT1/BUB1/CENPX/ZWILCH/UBE2C/CDC26/TOP3A/GEN1/AURKB/FANCM/ANAPC7	48
BP	GO:0030071	regulation of mitotic metaphase/anaphase transition	37/2099	60/18800	7.69733e-21	5.00428e-19	4.16957e-19	CDC27/ZNF207/SPDL1/RIOK2/TRIP13/NDC80/ZW10/ANAPC5/CDC6/CDC23/ANAPC15/FBXO5/TTK/IK/MAD2L2/CENPF/ZWINT/MAD2L1BP/PCID2/DLGAP5/CCNB1/ESPL1/CENPE/DYNC1LI1/NSMCE2/BUB1B/MAD2L1/RAD21/PLK1/CDT1/BUB1/ZWILCH/UBE2C/CDC26/GEN1/AURKB/ANAPC7	37
BP	GO:0050684	regulation of mRNA processing	58/2099	139/18800	2.14646e-20	1.37736e-18	1.14762e-18	PAF1/PTBP1/PTCD2/THRAP3/U2AF2/JMJD6/DAZAP1/SNRPA/SRPK1/RBM23/SNW1/ZC3H14/HNRNPL/C1QBP/SUPT6H/HSPA8/PRPF19/NUP98/CPSF6/SRSF9/SRSF3/FXR1/NCL/SRSF7/PRDX6/KHDRBS1/HNRNPA2B1/SMU1/METTL16/FXR2/HNRNPA1/DHX9/TRA2B/NCBP1/RBMX/CELF1/CPSF7/HNRNPU/RNF20/SAFB/SRSF2/RAVER1/MAGOH/RBM15/VIRMA/HNRNPK/LEO1/NUDT21/SF1/PUF60/RBM10/HSF1/SRSF10/SUPT5H/CTR9/NELFE/RNPS1/RBM8A	58
BP	GO:0043039	tRNA aminoacylation	31/2099	44/18800	2.99127e-20	1.89486e-18	1.57879e-18	LARS2/SARS1/KARS1/IARS2/AARS1/EARS2/GARS1/CARS1/TARS1/RARS1/FARSB/DARS2/AARS2/QRSL1/LRRC47/LARS1/NARS1/YARS1/EPRS1/NARS2/YARS2/TARS2/FARS2/PARS2/MARS1/HARS1/FARSA/IARS1/VARS1/MARS2/GATC	31
BP	GO:0009451	RNA modification	64/2099	166/18800	3.46951e-20	2.16998e-18	1.80803e-18	RPUSD1/NSUN2/METTL1/FTSJ1/ELP1/JMJD6/BUD23/HSD17B10/DIMT1/METTL2A/TRMT6/DNAJB11/AARS1/PUS7/TRMU/ALKBH1/PCIF1/CDK5RAP1/FBL/CBLL1/FTSJ3/GAR1/PUS3/THADA/METTL8/MOCS3/AARS2/EMG1/TRMT5/METTL16/GTPBP3/NSUN5/DKC1/ANKRD16/NAT10/TGS1/METTL5/SSB/DUS3L/TPRKB/NAF1/NHP2/MEPCE/QTRT2/RPUSD3/WDR4/HENMT1/RBM15/TFB2M/VIRMA/RPUSD4/RPUSD2/TRMT61A/TRUB2/ELP5/TRMT61B/TRMT10C/CTU2/PUS1/TRMT12/HNRNPAB/KTI12/TYW1/METTL6	64
BP	GO:1902099	regulation of metaphase/anaphase transition of cell cycle	37/2099	63/18800	8.37462e-20	5.17238e-18	4.30962e-18	CDC27/ZNF207/SPDL1/RIOK2/TRIP13/NDC80/ZW10/ANAPC5/CDC6/CDC23/ANAPC15/FBXO5/TTK/IK/MAD2L2/CENPF/ZWINT/MAD2L1BP/PCID2/DLGAP5/CCNB1/ESPL1/CENPE/DYNC1LI1/NSMCE2/BUB1B/MAD2L1/RAD21/PLK1/CDT1/BUB1/ZWILCH/UBE2C/CDC26/GEN1/AURKB/ANAPC7	37
BP	GO:0043038	amino acid activation	31/2099	45/18800	8.58947e-20	5.23958e-18	4.36562e-18	LARS2/SARS1/KARS1/IARS2/AARS1/EARS2/GARS1/CARS1/TARS1/RARS1/FARSB/DARS2/AARS2/QRSL1/LRRC47/LARS1/NARS1/YARS1/EPRS1/NARS2/YARS2/TARS2/FARS2/PARS2/MARS1/HARS1/FARSA/IARS1/VARS1/MARS2/GATC	31
BP	GO:0000460	maturation of 5.8S rRNA	27/2099	35/18800	1.61497e-19	9.73118e-18	8.10802e-18	LAS1L/MTREX/RRP15/NOP14/PES1/EXOSC3/FTSJ3/RPF1/ERI3/RCL1/UTP20/EXOSC9/RPP40/KRI1/EXOSC2/WDR12/URB1/NOL9/NSA2/EXOSC10/RPS21/EXOSC4/RRS1/NOP9/EIF6/PRKDC/BOP1	27
BP	GO:0045787	positive regulation of cell cycle	96/2099	329/18800	2.00669e-19	1.19459e-17	9.9533e-18	POLDIP2/CDC27/DBF4/PAF1/PAFAH1B1/DDX11/MNAT1/SPAG5/NDC80/AURKA/ANAPC5/CDC6/CDC23/CDC7/RANBP1/THOC5/APEX1/CDC25B/KIF3B/FAM83D/PSMD10/EZH2/RAD51C/RAD51AP1/FBXO5/MACROH2A1/ECT2/EIF4G1/TTL/SFPQ/KIF14/CPSF3/GPSM2/CIT/STIL/CKS2/MAD2L1BP/MED1/PCID2/DLGAP5/SLF1/CCNB1/PSRC1/CDK4/ESPL1/MYC/KIF23/KIF20B/BRCA2/CUL4A/RPTOR/PLK4/DTL/DYNC1LI1/CDCA5/MEPCE/CHEK1/EIF4E/CENPJ/HNRNPU/NSMCE2/SASS6/CDC25C/DBF4B/RACGAP…	96
BP	GO:0000462	maturation of SSU-rRNA from tricistronic rRNA transcript (SSU-rRNA, 5.8S rRNA, LSU-rRNA)	28/2099	38/18800	2.85625e-19	1.68009e-17	1.39985e-17	NOP14/ERCC2/RPS16/UTP6/BYSL/NOL10/UTP25/HEATR1/RCL1/UTP20/RRP36/RPP40/KRI1/NGDN/UTP3/UTP4/UTP23/DHX37/WDR43/DCAF13/BMS1/TSR1/RPS21/RRS1/MRPS11/TBL3/NOP9/WDR46	28
BP	GO:0051225	spindle assembly	52/2099	121/18800	4.1179e-19	2.39371e-17	1.99444e-17	POLDIP2/ZNF207/ASPM/KIF2A/SMC1A/SPAG5/NDC80/AURKA/TPX2/KIF4A/AAAS/MYBL2/KIF3B/MAPRE1/CHMP4B/BCCIP/SMC3/KPNB1/FBXO5/WRAP73/CDC20/NEK2/STAG1/GPSM2/HAUS8/KIF23/HAUS2/TUBGCP4/KIF11/HAUS6/RPS3/INCENP/HAUS1/HNRNPU/CCSAP/CCNB2/RACGAP1/KIF15/WASHC5/PLK1/SAC3D1/HDAC3/AURKB/RCC1/CHEK2/DRG1/TUBB/DYNC1H1/MZT1/KIFC1/HAUS5/LSM14A	52
BP	GO:0006418	tRNA aminoacylation for protein translation	29/2099	41/18800	4.19924e-19	2.41261e-17	2.01019e-17	LARS2/SARS1/KARS1/IARS2/AARS1/EARS2/GARS1/CARS1/TARS1/RARS1/FARSB/DARS2/AARS2/LRRC47/LARS1/NARS1/YARS1/EPRS1/NARS2/YARS2/TARS2/FARS2/PARS2/MARS1/HARS1/FARSA/IARS1/VARS1/MARS2	29
BP	GO:0051028	mRNA transport	53/2099	126/18800	6.04923e-19	3.43554e-17	2.8625e-17	UPF1/NUP160/NSUN2/THOC3/NDC1/NUP133/NUP37/XPO1/SEH1L/KHSRP/NUP50/AAAS/NUP188/POLDIP3/THOC5/RAE1/NUP93/NUP88/SUPT6H/NUP98/NUP107/SRSF3/NUP155/SRSF7/SMG7/GLE1/ENY2/HNRNPA2B1/DDX39A/NUP153/UPF3B/NUP85/PCID2/EIF5A/NXT1/HNRNPA1/DHX9/SRSF1/NCBP1/LRPPRC/NUP54/POLR2D/CETN3/AHCTF1/NUP205/NUP35/SLBP/HNRNPA3/ALYREF/HSF1/SMG5/NUP62/POM121C	53
BP	GO:0090068	positive regulation of cell cycle process	79/2099	247/18800	8.52662e-19	4.74409e-17	3.95278e-17	POLDIP2/CDC27/DBF4/PAF1/DDX11/SPAG5/NDC80/AURKA/ANAPC5/CDC6/CDC23/CDC7/RANBP1/THOC5/APEX1/CDC25B/KIF3B/FAM83D/EZH2/RAD51C/RAD51AP1/FBXO5/MACROH2A1/ECT2/EIF4G1/SFPQ/KIF14/CPSF3/GPSM2/CIT/STIL/MAD2L1BP/MED1/PCID2/DLGAP5/SLF1/CCNB1/CDK4/ESPL1/KIF23/KIF20B/CUL4A/RPTOR/PLK4/DTL/DYNC1LI1/CDCA5/MEPCE/CENPJ/HNRNPU/NSMCE2/SASS6/CDC25C/DBF4B/RACGAP1/CDC25A/MAD2L1/RAD21/E2F7/RRM1/CDT1/FEN1/CDK1/RHNO1/RRM2/M…	79
BP	GO:0006275	regulation of DNA replication	54/2099	131/18800	8.54531e-19	4.74409e-17	3.95278e-17	DBF4/RFC2/TIPIN/CDC6/CDC7/YY1/GINS1/ACTR5/CHRAC1/SSBP1/GTPBP4/SMC3/RFC5/TIMELESS/FBXO5/GMNN/PPP2CA/UCHL5/ZRANB3/ATF1/WRNIP1/GINS2/PCNA/RFC3/ORC3/DHX9/ACTL6A/DSCC1/DNA2/SMARCAL1/BRCA2/TICRR/CCNA2/GINS4/TERF1/POLE3/RAD17/DONSON/DBF4B/RFC4/ORC5/STOML2/E2F7/CDT1/CDK1/ESCO2/RUVBL1/ATAD5/GINS3/RUVBL2/FAF1/MCRS1/BLM/EHMT2	54
BP	GO:0046700	heterocycle catabolic process	115/2099	443/18800	1.31674e-18	7.22889e-17	6.02312e-17	UPF1/ELAC2/NSUN2/MTREX/MRTO4/THRAP3/NTHL1/YBX1/ELAVL1/ACAT1/UNG/EXOSC5/CNOT3/KHSRP/XRN2/FUS/HNRNPC/ACOT7/HNRNPM/ZC3H14/APEX1/E2F1/GSPT1/POP1/EIF3E/DDX49/NUDT1/LSM5/EXOSC3/MTPAP/CASC3/ZPR1/MAGOHB/FXR1/SMG7/PPP1R8/FASTKD2/SLIRP/ETF1/TARDBP/TENT4B/ZCCHC17/EXOSC9/AGO2/FASTKD3/UPF3B/ITPA/PCID2/METTL16/DUT/MBD4/FXR2/LSM4/EXOSC2/DKC1/SYNCRIP/DHX9/MRPL44/NUDT15/TBRG4/NCBP1/PNPT1/LRPPRC/DNA2/SSB/FASTKD1/H…	115
BP	GO:2001251	negative regulation of chromosome organization	43/2099	89/18800	2.10751e-18	1.14431e-16	9.53438e-17	BAZ1B/ZNF207/MNAT1/SPDL1/TRIP13/XRCC1/MCM2/NDC80/ZW10/HNRNPC/ANAPC15/FBXO5/TTK/IK/MAD2L2/CENPF/TENT4B/ZWINT/MAD2L1BP/PCID2/GNL3L/TOP2A/CCNB1/NAT10/ESPL1/HNRNPA1/PIF1/PARP1/DYNC1LI1/TERF1/HNRNPU/BUB1B/MAD2L1/PTTG1/RAD21/PLK1/CDT1/BUB1/EXOSC10/ZWILCH/GEN1/AURKB/PINX1	43
BP	GO:0044786	cell cycle DNA replication	29/2099	43/18800	3.32676e-18	1.78669e-16	1.48867e-16	UPF1/DBF4/RTF2/RAD51/MCM2/TIPIN/MCM6/CDC45/CDC7/GINS1/POLA1/MCM4/LIG1/ZPR1/FBXO5/MCM3/GMNN/PCNA/DNA2/BRCA2/TERF1/DONSON/DBF4B/E2F7/CDT1/FEN1/ATAD5/GINS3/BLM	29
BP	GO:0044270	cellular nitrogen compound catabolic process	115/2099	449/18800	3.99606e-18	2.12307e-16	1.76894e-16	UPF1/ELAC2/NSUN2/MTREX/MRTO4/THRAP3/NTHL1/YBX1/ELAVL1/ACAT1/UNG/EXOSC5/CNOT3/KHSRP/XRN2/FUS/HNRNPC/ACOT7/HNRNPM/ZC3H14/APEX1/E2F1/GSPT1/POP1/EIF3E/DDX49/NUDT1/LSM5/EXOSC3/MTPAP/CASC3/ZPR1/MAGOHB/FXR1/SMG7/PPP1R8/FASTKD2/SLIRP/ETF1/TARDBP/TENT4B/ZCCHC17/EXOSC9/AGO2/FASTKD3/UPF3B/ITPA/PCID2/METTL16/DUT/MBD4/FXR2/LSM4/EXOSC2/DKC1/SYNCRIP/DHX9/MRPL44/NUDT15/TBRG4/NCBP1/PNPT1/LRPPRC/DNA2/SSB/FASTKD1/H…	115
BP	GO:0006402	mRNA catabolic process	75/2099	233/18800	4.3448e-18	2.2838e-16	1.90286e-16	UPF1/MRTO4/THRAP3/YBX1/ELAVL1/EXOSC5/CNOT3/KHSRP/XRN2/FUS/HNRNPC/HNRNPM/ZC3H14/APEX1/E2F1/GSPT1/EIF3E/LSM5/EXOSC3/MTPAP/CASC3/MAGOHB/FXR1/SMG7/FASTKD2/ETF1/TARDBP/TENT4B/EXOSC9/AGO2/FASTKD3/UPF3B/PCID2/METTL16/FXR2/LSM4/EXOSC2/SYNCRIP/DHX9/TBRG4/NCBP1/PNPT1/SSB/FASTKD1/HNRNPD/EIF4A3/NT5C3B/SERBP1/POLR2D/CELF1/YTHDF1/NBAS/HNRNPU/LARP1/SUPV3L1/MAGOH/SMG8/POLR2G/EXOSC10/HNRNPA0/EXOSC4/EDC3/NPM1/RBM1…	75
BP	GO:0000470	maturation of LSU-rRNA	23/2099	28/18800	6.35788e-18	3.30677e-16	2.7552e-16	LAS1L/RRP15/DDX18/PES1/SNU13/GTPBP4/FTSJ3/RPF1/WDR12/URB1/NHP2/RPL7L1/RPL7/NIFK/NOL9/NSA2/MRPL1/RSL1D1/RPF2/RPL10A/EIF6/BOP1/ZNHIT3	23
BP	GO:0006405	RNA export from nucleus	41/2099	85/18800	1.40445e-17	7.22855e-16	6.02283e-16	UPF1/NUP160/NSUN2/THOC3/NUP133/NUP188/POLDIP3/THOC5/RAE1/NUP93/NUP88/SUPT6H/NUP107/CPSF6/SRSF3/NUP155/SMG7/GLE1/ENY2/KHDRBS1/HNRNPA2B1/DDX39A/XPO5/NUP153/NUP85/PCID2/RAN/NXT1/HNRNPA1/DHX9/NCBP1/SSB/POLR2D/PHAX/NOL6/NPM1/ALYREF/XPOT/SMG5/NUP62/POM121C	41
BP	GO:0090501	RNA phosphodiester bond hydrolysis	57/2099	152/18800	1.78777e-17	9.10655e-16	7.58758e-16	ELAC2/ANGEL1/CPSF1/EXOSC5/EXD2/NOP14/XRN2/APEX1/CSTF2/POP1/POP4/EXOSC3/CPSF6/ERI3/PPP1R8/CPSF3/RCL1/UTP20/EXOSC9/AGO2/RRP36/RPP40/KRI1/EXOSC2/TOE1/NCBP1/PNPT1/DBR1/NOB1/ISG20L2/FIP1L1/NHP2/UTP23/RPP30/CPSF7/CPSF4/POLR3K/NOL9/BMS1/CPSF2/NUDT21/TSR1/FEN1/TSEN34/EXOSC10/RPS21/POP7/EXO1/CSTF3/EXOSC4/RRS1/EDC3/TBL3/NOP9/SND1/CNOT7/BOP1	57
BP	GO:0010948	negative regulation of cell cycle process	87/2099	301/18800	1.93724e-17	9.76723e-16	8.13806e-16	BAZ1B/ZNF207/BRCA1/MRE11/NSUN2/SPDL1/TRIP13/TIPIN/GTSE1/RBL1/NDC80/ORC1/ZW10/WDR76/CLSPN/CDC45/CDC6/MSH2/CDC5L/THOC5/E2F1/DOT1L/FZR1/EZH2/PRPF19/ANAPC15/TIMELESS/FBXO5/TTK/IK/RAD1/MACROH2A1/MAD2L2/NEK2/CENPF/ZWINT/MAD2L1BP/PCID2/MEN1/CCNB1/RINT1/ESPL1/BRIP1/MDC1/DNA2/NABP2/CUL4A/TICRR/TIPRL/DTL/INTS7/FANCD2/DYNC1LI1/TERF1/CHEK1/RAD17/EME1/BUB1B/DONSON/NAE1/CCNF/TOPBP1/ATRIP/MAD2L1/PTTG1/RAD21/E2F…	87
BP	GO:1901988	negative regulation of cell cycle phase transition	78/2099	255/18800	2.58655e-17	1.29093e-15	1.0756e-15	ZNF207/BRCA1/MRE11/NSUN2/SPDL1/TRIP13/TIPIN/GTSE1/RBL1/NDC80/ORC1/ZW10/WDR76/CLSPN/CDC45/CDC6/MSH2/CDC5L/THOC5/E2F1/DOT1L/FZR1/EZH2/PRPF19/ANAPC15/TIMELESS/FBXO5/TTK/IK/RAD1/MACROH2A1/MAD2L2/CENPF/ZWINT/MAD2L1BP/PCID2/MEN1/CCNB1/RINT1/BRIP1/MDC1/DNA2/NABP2/CUL4A/TICRR/TIPRL/DTL/INTS7/FANCD2/DYNC1LI1/CHEK1/RAD17/EME1/BUB1B/DONSON/NAE1/TOPBP1/ATRIP/MAD2L1/RAD21/E2F7/BRD7/PLK1/CDT1/RFWD3/BUB1/CDK1/T…	78
BP	GO:0000469	cleavage involved in rRNA processing	22/2099	27/18800	4.72586e-17	2.33505e-15	1.94556e-15	NOP14/EXOSC3/ERI3/RCL1/UTP20/EXOSC9/RRP36/RPP40/KRI1/EXOSC2/NOB1/NHP2/UTP23/NOL9/BMS1/TSR1/EXOSC10/RPS21/RRS1/TBL3/NOP9/BOP1	22
BP	GO:0019439	aromatic compound catabolic process	115/2099	466/18800	8.00932e-17	3.91822e-15	3.26466e-15	UPF1/ELAC2/NSUN2/MTREX/MRTO4/THRAP3/NTHL1/YBX1/ELAVL1/ACAT1/UNG/EXOSC5/CNOT3/KHSRP/XRN2/FUS/HNRNPC/ACOT7/HNRNPM/ZC3H14/APEX1/E2F1/GSPT1/POP1/EIF3E/DDX49/NUDT1/LSM5/EXOSC3/MTPAP/CASC3/ZPR1/MAGOHB/FXR1/SMG7/PPP1R8/FASTKD2/SLIRP/ETF1/TARDBP/TENT4B/ZCCHC17/EXOSC9/AGO2/FASTKD3/UPF3B/ITPA/PCID2/METTL16/DUT/MBD4/FXR2/LSM4/EXOSC2/DKC1/SYNCRIP/DHX9/MRPL44/NUDT15/TBRG4/NCBP1/PNPT1/LRPPRC/DNA2/SSB/FASTKD1/H…	115
BP	GO:0007093	mitotic cell cycle checkpoint signaling	51/2099	130/18800	9.64771e-17	4.67346e-15	3.89393e-15	ZNF207/BRCA1/MRE11/SPDL1/TRIP13/TIPIN/GTSE1/NDC80/ORC1/ZW10/CLSPN/CDC6/MSH2/FZR1/ANAPC15/TTK/IK/MAD2L2/CENPF/ZWINT/MAD2L1BP/PCID2/CCNB1/RINT1/MDC1/NABP2/TICRR/DTL/FANCD2/DYNC1LI1/CHEK1/RAD17/EME1/BUB1B/DONSON/NAE1/TOPBP1/MAD2L1/PLK1/CDT1/RFWD3/BUB1/CDK1/TRIAP1/ZWILCH/GEN1/AURKB/CHEK2/BRCC3/BLM/PRKDC	51
BP	GO:0006270	DNA replication initiation	26/2099	38/18800	1.07475e-16	5.10609e-15	4.25439e-15	MCM10/MCM2/MCM6/ORC1/ORC6/CDC45/CDC6/MCM5/POLA1/MCM4/CCNE1/MCM3/GMNN/WRNIP1/ORC3/TICRR/PRIM2/LRWD1/TOPBP1/ORC5/MCM7/CDT1/NOC3L/CCNE2/GINS3/PRIM1	26
BP	GO:0033260	nuclear DNA replication	26/2099	38/18800	1.07475e-16	5.10609e-15	4.25439e-15	UPF1/DBF4/RTF2/RAD51/MCM2/TIPIN/MCM6/CDC45/CDC7/GINS1/POLA1/MCM4/LIG1/MCM3/GMNN/PCNA/DNA2/BRCA2/TERF1/DONSON/DBF4B/CDT1/FEN1/ATAD5/GINS3/BLM	26
BP	GO:0043414	macromolecule methylation	91/2099	331/18800	1.17588e-16	5.53336e-15	4.6104e-15	KDM1A/PAF1/BRCA1/PHF20/NSUN2/METTL1/FTSJ1/BUD23/HSD17B10/RIF1/DIMT1/METTL2A/TRMT6/SMARCB1/SNRPD3/PRMT5/SNW1/PCIF1/SUV39H1/GSPT1/PIH1D1/DOT1L/FBL/CBLL1/EZH2/FTSJ3/SUPT6H/NSD2/MACROH2A1/THADA/RBBP5/EEF2KMT/HELLS/PCMT1/ETF1/METTL8/SNRPB/PRMT1/EMG1/TRMT5/METTL16/GTPBP3/NSUN5/TRIM28/DNMT1/MEN1/SMYD5/PWP1/MYC/TGS1/METTL5/KANSL2/CARM1/PARP1/MEPCE/NTMT1/MTA2/SUV39H2/RNF20/PAXIP1/MIS18A/WDR4/HENMT1/RBM15/…	91
BP	GO:0051310	metaphase plate congression	34/2099	65/18800	3.41757e-16	1.59304e-14	1.32732e-14	SPDL1/SPAG5/KIF22/NDC80/SEH1L/ZW10/NUDC/CDC23/CHMP4B/FAM83D/KPNB1/TTL/CENPF/KIF14/KIF18A/CCNB1/PSRC1/CDCA8/CENPE/KIF2C/NUF2/BOD1/CDCA5/INCENP/HNRNPU/CDT1/DCTN2/AURKB/RRS1/DYNC1H1/CHAMP1/NUP62/KIFC1/PINX1	34
BP	GO:0000959	mitochondrial RNA metabolic process	29/2099	49/18800	6.10938e-16	2.82116e-14	2.35059e-14	ELAC2/HSD17B10/CDK5RAP1/EARS2/GARS1/TWNK/TFAM/DARS2/FASTKD2/SLIRP/FASTKD3/AARS2/TRMT5/MTERF1/TBRG4/PNPT1/LRPPRC/FASTKD1/YARS2/TARS2/SUPV3L1/TFB2M/RPUSD4/TRMT61B/SLC25A33/TEFM/TRMT10C/PUS1/FASTKD5	29
BP	GO:0071824	protein-DNA complex subunit organization	72/2099	237/18800	6.53624e-16	2.99033e-14	2.49154e-14	RAD51/TAF2/TAF11/SMARCD1/PSME4/MCM2/ACTR6/SART3/SUPT16H/CDC45/SMARCB1/PSMC6/CENPI/OIP5/BRF2/CHRAC1/PIH1D1/ASF1B/GRWD1/TAF6/UBTF/RAD51C/SMARCD2/SUPT6H/CAND1/RNF8/GMNN/TBP/MACROH2A1/CENPA/TAF1B/CENPF/SET/HELLS/CENPK/HJURP/DLGAP5/SMARCA4/TAF4/NASP/ANP32B/MYC/POLR1E/HMGA1/CENPO/CENPE/GTF2A2/ANP32E/TERF1/POLE3/TAF5/SSRP1/CENPH/GTF2E1/MIS18A/CHAF1B/TAF6L/HMGB2/CENPN/CDT1/CHAF1A/CENPX/TAF7/NPM1/NAP1L1/C…	72
BP	GO:0051303	establishment of chromosome localization	38/2099	81/18800	6.90976e-16	3.13222e-14	2.60976e-14	SPDL1/NDE1/SPAG5/KIF22/NDC80/SEH1L/ZW10/NUDC/CDC23/CHMP4B/FAM83D/KPNB1/TTL/CENPF/KIF14/KIF18A/DLGAP5/CCNB1/PSRC1/CDCA8/CENPE/KATNB1/KIF2C/NUF2/BOD1/CDCA5/TERF1/INCENP/HNRNPU/CDT1/DCTN2/AURKB/RRS1/DYNC1H1/CHAMP1/NUP62/KIFC1/PINX1	38
BP	GO:0045727	positive regulation of translation	52/2099	141/18800	1.03802e-15	4.6626e-14	3.88488e-14	YBX1/ELAVL1/POLDIP3/EIF3D/PCIF1/CDK5RAP1/EIF3E/C1QBP/MRPS27/FXR1/EIF4G1/FASTKD2/TENT4B/KHDRBS1/RPL5/AGO2/FASTKD3/UPF3B/FXR2/NSUN5/EIF2S3/EIF5A/SYNCRIP/NAT10/DHX9/METTL5/HNRNPD/TARBP2/EIF4A3/POLR2D/EIF2B5/YTHDF1/CDC123/HNRNPU/LARP1/RPUSD3/LARP4/RPUSD4/TRUB2/EEF2/POLR2G/CNBP/TRMT10C/RPS6KB2/NPM1/EIF3C/RPS4X/MTOR/EIF6/PRKDC/MPV17L2/RCC1L	52
BP	GO:2000278	regulation of DNA biosynthetic process	47/2099	119/18800	1.1287e-15	5.02426e-14	4.18621e-14	RFC2/XRCC5/HSP90AA1/MAPKAPK5/HNRNPC/HSP90AB1/GINS1/DNAJC2/PTGES3/RFC5/CCT4/NEK2/TCP1/TENT4B/HNRNPA2B1/GNL3L/DKC1/GINS2/PCNA/RFC3/MEN1/NAT10/HNRNPA1/CCT7/DSCC1/MYC/HNRNPD/PIF1/WRAP53/NVL/NAF1/CCT6A/GINS4/TERF1/CHEK1/CCT5/HNRNPU/CCT8/CCT3/RFC4/CCT2/EXOSC10/AURKB/GINS3/TFDP1/SMG5/PINX1	47
BP	GO:0007088	regulation of mitotic nuclear division	45/2099	111/18800	1.43124e-15	6.31409e-14	5.2609e-14	CDC27/ZNF207/SPDL1/TRIP13/NDC80/ZW10/AURKA/ANAPC5/CDC23/PRMT5/ANAPC15/FBXO5/TTK/IK/MAD2L2/NEK2/CENPF/ZWINT/MAD2L1BP/PCID2/DLGAP5/PKMYT1/CCNB1/ESPL1/BORA/KIF20B/DYNC1LI1/MKI67/CHEK1/NSMCE2/BUB1B/CDC25C/MAD2L1/RAD21/PLK1/CDT1/BUB1/MTBP/ZWILCH/GEN1/AURKB/RCC1/CDCA2/ANAPC7/NUP62	45
BP	GO:0017038	protein import	66/2099	210/18800	1.66983e-15	7.30144e-14	6.08356e-14	TNPO3/IPO5/ELAVL1/NUP133/TIMM21/HSP90AA1/TNPO1/IPO11/RBM22/NUP50/NUP188/HSP90AB1/TOMM22/SAMM50/NUP93/TIMM44/PDCD5/TIMM50/TNPO2/KPNB1/NUP88/GRPEL1/ZPR1/HSPA8/NUP98/NUP107/TMCO6/NUP155/ECT2/SUMO1/IPO13/FAM53C/TARDBP/CSE1L/NUP153/NUP85/MED1/TOMM40/TRIM28/RAN/NXT1/TIMM17A/NUP54/PEX5/HSPD1/HIKESHI/TOMM70/HEATR3/AIFM1/PEX10/NUP35/CHCHD4/GRPEL2/NOLC1/SNUPN/CDK1/HSPA4/HDAC3/TOMM20/KPNA2/IPO9/IPO7/NUP62/P…	66
BP	GO:0050000	chromosome localization	38/2099	83/18800	1.89467e-15	8.21191e-14	6.84216e-14	SPDL1/NDE1/SPAG5/KIF22/NDC80/SEH1L/ZW10/NUDC/CDC23/CHMP4B/FAM83D/KPNB1/TTL/CENPF/KIF14/KIF18A/DLGAP5/CCNB1/PSRC1/CDCA8/CENPE/KATNB1/KIF2C/NUF2/BOD1/CDCA5/TERF1/INCENP/HNRNPU/CDT1/DCTN2/AURKB/RRS1/DYNC1H1/CHAMP1/NUP62/KIFC1/PINX1	38
BP	GO:1901361	organic cyclic compound catabolic process	116/2099	494/18800	2.84398e-15	1.22192e-13	1.0181e-13	UPF1/ELAC2/NSUN2/MTREX/MRTO4/THRAP3/NTHL1/YBX1/ELAVL1/ACAT1/UNG/EXOSC5/CNOT3/KHSRP/XRN2/FUS/HNRNPC/ACOT7/HNRNPM/ZC3H14/APEX1/E2F1/GSPT1/POP1/EIF3E/DDX49/NUDT1/LSM5/EXOSC3/MTPAP/CASC3/ZPR1/MAGOHB/FXR1/SNX17/SMG7/PPP1R8/FASTKD2/SLIRP/ETF1/TARDBP/TENT4B/ZCCHC17/EXOSC9/AGO2/FASTKD3/UPF3B/ITPA/PCID2/METTL16/DUT/MBD4/FXR2/LSM4/EXOSC2/DKC1/SYNCRIP/DHX9/MRPL44/NUDT15/TBRG4/NCBP1/PNPT1/LRPPRC/DNA2/SSB/FAS…	116
BP	GO:0010833	telomere maintenance via telomere lengthening	37/2099	81/18800	4.85917e-15	2.06975e-13	1.72452e-13	MRE11/RAD51/XRCC5/HSP90AA1/MAPKAPK5/HNRNPC/HSP90AB1/GAR1/PTGES3/CCT4/NEK2/DCLRE1B/TCP1/TENT4B/HNRNPA2B1/GNL3L/DKC1/RPA1/NAT10/HNRNPA1/CCT7/PIF1/WRAP53/PARP1/NAF1/NHP2/CCT6A/TERF1/CCT5/HNRNPU/CCT8/CCT3/CCT2/EXOSC10/AURKB/SMG5/PINX1	37
BP	GO:0044839	cell cycle G2/M phase transition	54/2099	155/18800	4.90262e-15	2.07042e-13	1.72507e-13	BRCA1/MRE11/TAF2/NDC80/ORC1/AURKA/CLSPN/CDC6/CDC7/CDC25B/FZR1/RAD51C/FOXM1/FBXO5/MACROH2A1/CENPF/KIF14/MASTL/KHDRBS1/CIT/PKMYT1/CCNB1/RINT1/CDK4/NABP2/TICRR/DTL/CALM2/CCNA2/CHEK1/RAD17/PAXIP1/CCNB2/CDC25C/DONSON/NAE1/DBF4B/TOPBP1/CDC25A/RAD21/MELK/PLK1/RRM1/CDK1/ATAD5/AURKB/RCC2/NPM1/CHEK2/BRCC3/BLM/PPME1/PINX1/CCNQ	54
BP	GO:0031124	mRNA 3'-end processing	32/2099	63/18800	7.63427e-15	3.19669e-13	2.66348e-13	PAF1/CPSF1/SNRPA/ZC3H14/CSTF1/RPRD1B/CSTF2/MTPAP/CPSF6/CPSF3/TENT4B/SYMPK/NCBP1/PNPT1/ZNF473/POLR2D/FIP1L1/CPSF7/RNF20/SSU72/CPSF4/SLBP/VIRMA/CPSF2/LEO1/NUDT21/CLP1/CSTF3/HSF1/SUPT5H/CTR9/NELFE	32
BP	GO:0033047	regulation of mitotic sister chromatid segregation	27/2099	46/18800	8.28229e-15	3.43889e-13	2.86528e-13	ZNF207/SPDL1/TRIP13/NDC80/ZW10/ANAPC15/FBXO5/TTK/IK/MAD2L2/CENPF/ZWINT/MAD2L1BP/PCID2/CCNB1/DYNC1LI1/HNRNPU/BUB1B/MAD2L1/PTTG1/RAD21/PLK1/CDT1/BUB1/ZWILCH/GEN1/AURKB	27
BP	GO:0033046	negative regulation of sister chromatid segregation	26/2099	43/18800	9.53957e-15	3.86353e-13	3.21909e-13	ZNF207/SPDL1/TRIP13/NDC80/ZW10/ANAPC15/FBXO5/TTK/IK/MAD2L2/CENPF/ZWINT/MAD2L1BP/PCID2/CCNB1/DYNC1LI1/BUB1B/MAD2L1/PTTG1/RAD21/PLK1/CDT1/BUB1/ZWILCH/GEN1/AURKB	26
BP	GO:0033048	negative regulation of mitotic sister chromatid segregation	26/2099	43/18800	9.53957e-15	3.86353e-13	3.21909e-13	ZNF207/SPDL1/TRIP13/NDC80/ZW10/ANAPC15/FBXO5/TTK/IK/MAD2L2/CENPF/ZWINT/MAD2L1BP/PCID2/CCNB1/DYNC1LI1/BUB1B/MAD2L1/PTTG1/RAD21/PLK1/CDT1/BUB1/ZWILCH/GEN1/AURKB	26
BP	GO:2000816	negative regulation of mitotic sister chromatid separation	26/2099	43/18800	9.53957e-15	3.86353e-13	3.21909e-13	ZNF207/SPDL1/TRIP13/NDC80/ZW10/ANAPC15/FBXO5/TTK/IK/MAD2L2/CENPF/ZWINT/MAD2L1BP/PCID2/CCNB1/DYNC1LI1/BUB1B/MAD2L1/PTTG1/RAD21/PLK1/CDT1/BUB1/ZWILCH/GEN1/AURKB	26
BP	GO:0006352	DNA-templated transcription, initiation	49/2099	134/18800	1.02228e-14	4.10657e-13	3.42159e-13	E2F2/MED24/ELOA/TAF2/TAF11/SMARCB1/POLR3H/PSMC6/MAZ/BRF2/PIH1D1/MED26/POLR1F/TAF6/TFAM/UBTF/CAND1/TBP/SUB1/TAF1B/GTF3C4/GTF2F1/MED1/SMARCA4/TAF4/CDK7/CDK4/MYC/POLR1E/GTF2A2/TAF4B/POLR2D/GTF3C5/TAF5/GTF2E1/ELOC/PAXIP1/TAF6L/TFB2M/ERCC3/MED30/POLR2G/TAF7/MED14/HMGB1/GTF2E2/NCOA6/CRCP/TAF9	49
BP	GO:0045841	negative regulation of mitotic metaphase/anaphase transition	25/2099	40/18800	1.03437e-14	4.12163e-13	3.43414e-13	ZNF207/SPDL1/TRIP13/NDC80/ZW10/ANAPC15/FBXO5/TTK/IK/MAD2L2/CENPF/ZWINT/MAD2L1BP/PCID2/CCNB1/DYNC1LI1/BUB1B/MAD2L1/RAD21/PLK1/CDT1/BUB1/ZWILCH/GEN1/AURKB	25
BP	GO:0051783	regulation of nuclear division	50/2099	139/18800	1.16917e-14	4.62151e-13	3.85064e-13	CDC27/ZNF207/SPDL1/TRIP13/NDC80/ZW10/AURKA/ANAPC5/CDC23/PRMT5/FZR1/ANAPC15/RAD51AP1/FBXO5/TTK/IK/RAD1/MAD2L2/CDC20/NEK2/CENPF/ZWINT/MAD2L1BP/PCID2/DLGAP5/PKMYT1/CCNB1/ESPL1/BORA/KIF20B/DYNC1LI1/MKI67/CHEK1/NSMCE2/BUB1B/CDC25C/MAD2L1/RAD21/PLK1/CDT1/BUB1/MTBP/ZWILCH/GEN1/AURKB/CALR/RCC1/CDCA2/ANAPC7/NUP62	50
BP	GO:0051321	meiotic cell cycle	75/2099	266/18800	1.37019e-14	5.37309e-13	4.47686e-13	NCAPD2/MRE11/NCAPH2/NSUN2/RAD51/NDC1/ASPM/TRIP13/SMC1A/NDC80/RAD54L/ZW10/AURKA/CCNB1IP1/CDC25B/CCNE1/FZR1/SMC3/RAD51C/RAD51AP1/FBXO5/TTK/RAD1/PPP2CA/SMC4/MSH6/CDC20/NEK2/MASTL/NCAPH/KIF18A/CKS2/STK35/PKMYT1/SGO1/TUBG1/PSMC3IP/TOP2A/RPA1/FIGNL1/ESPL1/BRIP1/SMC2/TUBGCP4/BRCA2/NUF2/FANCD2/TERF1/INCENP/NCAPD3/EME1/BUB1B/CCNB2/CDC25C/SGO2/CDC25A/PTTG1/RAD21/WASHC5/PLK1/ING2/BUB1/CENPX/EXO1/CCNE2/TOP3A…	75
BP	GO:0000466	maturation of 5.8S rRNA from tricistronic rRNA transcript (SSU-rRNA, 5.8S rRNA, LSU-rRNA)	19/2099	24/18800	1.84017e-14	7.15929e-13	5.96512e-13	NOP14/PES1/EXOSC3/FTSJ3/ERI3/RCL1/UTP20/EXOSC9/RPP40/KRI1/EXOSC2/WDR12/URB1/NOL9/EXOSC10/RPS21/RRS1/NOP9/BOP1	19
BP	GO:0045786	negative regulation of cell cycle	96/2099	387/18800	2.12963e-14	8.2207e-13	6.84949e-13	BAZ1B/ZNF207/BRCA1/MRE11/NSUN2/SPDL1/IPO5/TRIP13/NLE1/TIPIN/GTSE1/RBL1/NDC80/ORC1/ZW10/TFAP4/WDR76/CLSPN/CDC45/CDC6/MSH2/CDC5L/THOC5/CDK5RAP1/E2F1/SUV39H1/DOT1L/FZR1/TAF6/EZH2/PRPF19/ANAPC15/TIMELESS/FBXO5/GMNN/TTK/IK/RAD1/MACROH2A1/HTRA2/MAD2L2/NEK2/CENPF/ZWINT/MAD2L1BP/PCID2/MEN1/CCNB1/RINT1/ESPL1/BRIP1/MDC1/DNA2/NABP2/CUL4A/TICRR/TIPRL/DTL/INTS7/FANCD2/DYNC1LI1/TERF1/CHEK1/RAD17/EME1/BUB1B/DON…	96
BP	GO:0032259	methylation	94/2099	376/18800	2.40319e-14	9.20477e-13	7.66942e-13	KDM1A/PAF1/BRCA1/PHF20/NSUN2/METTL1/FTSJ1/BUD23/HSD17B10/RIF1/DIMT1/METTL2A/TRMT6/SMARCB1/SNRPD3/PRMT5/SNW1/PCIF1/SUV39H1/GSPT1/PIH1D1/DOT1L/FBL/CBLL1/EZH2/FTSJ3/SUPT6H/NSD2/MACROH2A1/THADA/RBBP5/DPH5/EEF2KMT/HELLS/PCMT1/ETF1/METTL8/SNRPB/PRMT1/EMG1/TRMT5/METTL16/GTPBP3/NSUN5/TRIM28/DNMT1/COQ3/MEN1/SMYD5/PWP1/MYC/TGS1/METTL5/KANSL2/CARM1/PARP1/MEPCE/NTMT1/MTA2/SUV39H2/RNF20/PAXIP1/MIS18A/WDR4/HEN…	94
BP	GO:0031570	DNA integrity checkpoint signaling	46/2099	123/18800	2.53114e-14	9.54686e-13	7.95444e-13	BRCA1/MRE11/TIPIN/GTSE1/ORC1/WDR76/CLSPN/CDC45/CDC6/MSH2/CDC5L/THOC5/E2F1/DOT1L/FZR1/PRPF19/TIMELESS/RAD1/RINT1/BRIP1/MDC1/DNA2/CUL4A/TICRR/TIPRL/DTL/INTS7/FANCD2/CHEK1/RAD17/EME1/DONSON/NAE1/TOPBP1/ATRIP/PLK1/CDT1/RFWD3/CDK1/TRIAP1/RHNO1/CHEK2/BRCC3/H2AX/BLM/PRKDC	46
BP	GO:1901989	positive regulation of cell cycle phase transition	46/2099	123/18800	2.53114e-14	9.54686e-13	7.95444e-13	CDC27/PAF1/ANAPC5/CDC6/CDC23/CDC7/THOC5/APEX1/CDC25B/FAM83D/EZH2/RAD51C/FBXO5/EIF4G1/CPSF3/STIL/MAD2L1BP/DLGAP5/CCNB1/CDK4/ESPL1/CUL4A/RPTOR/DTL/CDCA5/MEPCE/CENPJ/NSMCE2/SASS6/CDC25C/DBF4B/CDC25A/RRM1/CDT1/CDK1/RRM2/MTBP/UBE2C/ATAD5/RCC2/NPM1/CHEK2/ANAPC7/DDRGK1/TFDP1/PHB2	46
BP	GO:0007080	mitotic metaphase plate congression	28/2099	51/18800	2.75657e-14	1.02546e-12	8.5441e-13	SPDL1/KIF22/NDC80/SEH1L/ZW10/NUDC/CDC23/CHMP4B/KPNB1/KIF14/KIF18A/CCNB1/PSRC1/CDCA8/CENPE/KIF2C/NUF2/BOD1/CDCA5/HNRNPU/CDT1/DCTN2/AURKB/RRS1/CHAMP1/NUP62/KIFC1/PINX1	28
BP	GO:0007004	telomere maintenance via telomerase	33/2099	69/18800	2.76028e-14	1.02546e-12	8.5441e-13	MRE11/XRCC5/HSP90AA1/MAPKAPK5/HNRNPC/HSP90AB1/GAR1/PTGES3/CCT4/NEK2/TCP1/TENT4B/GNL3L/DKC1/RPA1/NAT10/HNRNPA1/CCT7/PIF1/WRAP53/NAF1/NHP2/CCT6A/TERF1/CCT5/HNRNPU/CCT8/CCT3/CCT2/EXOSC10/AURKB/SMG5/PINX1	33
BP	GO:0006268	DNA unwinding involved in DNA replication	18/2099	22/18800	3.19765e-14	1.17907e-12	9.82403e-13	RAD51/MCM2/MCM6/CDC45/MCM5/GINS1/MCM4/SSBP1/TWNK/MCM3/GINS2/RPA1/HMGA1/GINS4/RECQL4/MCM7/GINS3/BLM	18
BP	GO:0045839	negative regulation of mitotic nuclear division	27/2099	48/18800	3.55407e-14	1.30079e-12	1.08382e-12	ZNF207/SPDL1/TRIP13/NDC80/ZW10/ANAPC15/FBXO5/TTK/IK/MAD2L2/CENPF/ZWINT/MAD2L1BP/PCID2/CCNB1/DYNC1LI1/CHEK1/BUB1B/MAD2L1/RAD21/PLK1/CDT1/BUB1/MTBP/ZWILCH/GEN1/AURKB	27
BP	GO:0051985	negative regulation of chromosome segregation	26/2099	45/18800	4.41313e-14	1.59163e-12	1.32614e-12	ZNF207/SPDL1/TRIP13/NDC80/ZW10/ANAPC15/FBXO5/TTK/IK/MAD2L2/CENPF/ZWINT/MAD2L1BP/PCID2/CCNB1/DYNC1LI1/BUB1B/MAD2L1/PTTG1/RAD21/PLK1/CDT1/BUB1/ZWILCH/GEN1/AURKB	26
BP	GO:1905819	negative regulation of chromosome separation	26/2099	45/18800	4.41313e-14	1.59163e-12	1.32614e-12	ZNF207/SPDL1/TRIP13/NDC80/ZW10/ANAPC15/FBXO5/TTK/IK/MAD2L2/CENPF/ZWINT/MAD2L1BP/PCID2/CCNB1/DYNC1LI1/BUB1B/MAD2L1/PTTG1/RAD21/PLK1/CDT1/BUB1/ZWILCH/GEN1/AURKB	26
BP	GO:0016570	histone modification	113/2099	494/18800	4.48406e-14	1.60549e-12	1.33769e-12	KDM1A/PAF1/MED24/BAZ1B/BRCA1/PHF20/VRK2/USP36/TAF2/JMJD6/SART3/RIF1/HUWE1/ATXN7L3/AURKA/KDM2B/RCOR1/SMARCB1/PRMT5/SNW1/VRK1/BRMS1L/MRGBP/SUV39H1/RBBP7/PIH1D1/DOT1L/FBL/TAF6/EZH2/SUPT6H/NSD2/RNF8/MACROH2A1/PCGF1/PARK7/HDAC1/SFPQ/RBBP5/SET/ENY2/NAA50/GTF3C4/PRMT1/YEATS4/HAT1/PARP2/TAF4/DNMT1/MEN1/SMYD5/TAF5L/PWP1/ACTL6A/BRCA2/KANSL2/CARM1/CCNA2/NCAPG2/POLE3/NTMT1/TAF5/KAT14/MTA2/INCENP/CHEK1/SUV39H…	113
BP	GO:0034504	protein localization to nucleus	79/2099	294/18800	4.77056e-14	1.69578e-12	1.41292e-12	PAF1/INTS13/TNPO3/IPO5/ELAVL1/POLR1A/NUP133/XPO1/TNPO1/IPO11/RBM22/NUP50/NUP188/HSP90AB1/RANGAP1/NUP93/TNPO2/KPNB1/NUP88/YWHAE/ZPR1/NUP98/NUP107/BYSL/TMCO6/NUP155/ECT2/CCT4/SUMO1/PARK7/IPO13/UTP25/TCP1/FAM53C/TARDBP/CSE1L/NUP153/NUP85/MED1/TRIM28/DKC1/RAN/NXT1/CCT7/NUP54/WRAP53/HDGF/NVL/PARP1/CCT6A/MEPCE/MFHAS1/HIKESHI/CCT5/HNRNPU/HEATR3/CCT8/ATP13A2/NUP35/CCT3/NOLC1/CCT2/PLK1/SNUPN/CDK1/HDAC3/RR…	79
BP	GO:1902100	negative regulation of metaphase/anaphase transition of cell cycle	25/2099	42/18800	5.23385e-14	1.84718e-12	1.53907e-12	ZNF207/SPDL1/TRIP13/NDC80/ZW10/ANAPC15/FBXO5/TTK/IK/MAD2L2/CENPF/ZWINT/MAD2L1BP/PCID2/CCNB1/DYNC1LI1/BUB1B/MAD2L1/RAD21/PLK1/CDT1/BUB1/ZWILCH/GEN1/AURKB	25
BP	GO:0090329	regulation of DNA-templated DNA replication	28/2099	52/18800	5.33788e-14	1.87053e-12	1.55853e-12	DBF4/RFC2/TIPIN/CDC7/GINS1/SSBP1/RFC5/TIMELESS/FBXO5/GMNN/ZRANB3/WRNIP1/GINS2/PCNA/RFC3/DSCC1/SMARCAL1/BRCA2/TICRR/GINS4/DONSON/DBF4B/RFC4/STOML2/E2F7/CDT1/GINS3/BLM	28
BP	GO:0048024	regulation of mRNA splicing, via spliceosome	41/2099	103/18800	5.44519e-14	1.8947e-12	1.57866e-12	PTBP1/THRAP3/U2AF2/JMJD6/DAZAP1/SRPK1/RBM23/SNW1/HNRNPL/C1QBP/HSPA8/PRPF19/NUP98/SRSF9/SRSF3/FXR1/NCL/SRSF7/PRDX6/KHDRBS1/HNRNPA2B1/SMU1/METTL16/FXR2/HNRNPA1/TRA2B/NCBP1/RBMX/CELF1/HNRNPU/SRSF2/RAVER1/MAGOH/RBM15/HNRNPK/SF1/PUF60/RBM10/SRSF10/RNPS1/RBM8A	41
BP	GO:0006400	tRNA modification	37/2099	88/18800	1.20868e-13	4.1763e-12	3.47969e-12	NSUN2/METTL1/FTSJ1/ELP1/HSD17B10/METTL2A/TRMT6/AARS1/PUS7/TRMU/ALKBH1/CDK5RAP1/PUS3/THADA/METTL8/MOCS3/AARS2/TRMT5/GTPBP3/ANKRD16/NAT10/SSB/DUS3L/TPRKB/QTRT2/WDR4/RPUSD4/TRMT61A/ELP5/TRMT61B/TRMT10C/CTU2/PUS1/TRMT12/KTI12/TYW1/METTL6	37
BP	GO:0007007	inner mitochondrial membrane organization	24/2099	40/18800	1.31062e-13	4.49707e-12	3.74696e-12	AGK/DNAJC11/TIMM13/SAMM50/TIMM9/CHCHD3/HSPA9/TIMM8A/IMMT/TIMM10/MYC/AFG3L2/TIMM29/TIMM8B/TOMM70/CHCHD6/MAIP1/GHITM/LETM1/MTX1/TIMM22/APOO/OPA1/UQCC3	24
BP	GO:0000387	spliceosomal snRNP assembly	27/2099	50/18800	1.37484e-13	4.68489e-12	3.90345e-12	STRAP/DDX20/CLNS1A/SART3/GEMIN5/GEMIN2/SNRPD3/PRMT5/PRPF6/PRPF31/PRPF19/SNRPC/SNRPD2/SNRPB/LSM4/AAR2/TGS1/SNRPF/SNRPG/GEMIN6/SNRPD1/PRPF8/SART1/GEMIN4/SNRPE/SRSF10/LSM2	27
BP	GO:1903046	meiotic cell cycle process	62/2099	207/18800	1.38787e-13	4.6969e-12	3.91346e-12	NCAPD2/MRE11/NCAPH2/NSUN2/RAD51/NDC1/ASPM/TRIP13/NDC80/RAD54L/AURKA/CCNB1IP1/CDC25B/CCNE1/FZR1/RAD51C/RAD51AP1/FBXO5/TTK/RAD1/SMC4/MSH6/CDC20/MASTL/NCAPH/KIF18A/CKS2/SGO1/TUBG1/PSMC3IP/TOP2A/FIGNL1/ESPL1/BRIP1/SMC2/BRCA2/NUF2/FANCD2/TERF1/INCENP/NCAPD3/EME1/BUB1B/CCNB2/CDC25C/SGO2/CDC25A/PTTG1/RAD21/WASHC5/PLK1/ING2/BUB1/CENPX/CCNE2/CALR/RAD51D/PSMD13/FANCA/FANCM/EHMT2/BAG6	62
BP	GO:0022616	DNA strand elongation	23/2099	37/18800	1.44411e-13	4.85399e-12	4.04435e-12	MRE11/POLD3/YY1/GINS1/ACTR5/POLA1/MCM4/LIG1/POLD2/MCM3/UCHL5/DCLRE1B/PCNA/RFC3/ACTL6A/DNA2/POLE3/RFC4/MCM7/RUVBL1/POLE/RUVBL2/MCRS1	23
BP	GO:0009303	rRNA transcription	22/2099	34/18800	1.46918e-13	4.90487e-12	4.08674e-12	DDX11/TCOF1/SMARCB1/PIH1D1/NPM3/MACROH2A1/NCL/GTF3C2/TAF1B/POLR1G/GTF3C3/GTF3C4/POLR1B/IPPK/SMARCA4/NOL11/PWP1/POLR1E/GTF3C5/NIFK/MARS1/MTOR	22
BP	GO:2001252	positive regulation of chromosome organization	37/2099	89/18800	1.84786e-13	6.12771e-12	5.10561e-12	NCAPD2/DDX11/MRE11/XRCC5/MAPKAPK5/SSBP1/NCAPG/MACROH2A1/SMC4/CCT4/SFPQ/NEK2/TCP1/NCAPH/HNRNPA2B1/MAD2L1BP/TRIM28/DNMT1/DKC1/SLF1/MORC2/HNRNPA1/CCT7/SMC2/HNRNPD/NABP2/NAF1/CCT6A/CCT5/CCT8/NSMCE2/CCT3/RAD21/CCT2/CDT1/FEN1/AURKB	37
BP	GO:0042255	ribosome assembly	30/2099	62/18800	2.77833e-13	9.15183e-12	7.62531e-12	MRTO4/NLE1/XRCC5/MRPL22/RPS5/RPLP0/C1QBP/BRIX1/FASTKD2/MRPS2/RPL5/MRPS7/TRAF7/ERAL1/NIP7/EIF2A/DHX37/MTERF3/RRS1/NPM1/MRPS11/DDX28/RRP7A/RPF2/RPL23A/EIF6/MRPL20/PRKDC/MPV17L2/BOP1	30
BP	GO:0000956	nuclear-transcribed mRNA catabolic process	44/2099	121/18800	2.91875e-13	9.5507e-12	7.95764e-12	UPF1/MRTO4/THRAP3/YBX1/EXOSC5/CNOT3/XRN2/GSPT1/EIF3E/EXOSC3/MTPAP/CASC3/MAGOHB/SMG7/ETF1/TENT4B/EXOSC9/AGO2/UPF3B/PCID2/LSM4/EXOSC2/SYNCRIP/DHX9/NCBP1/SSB/HNRNPD/EIF4A3/NT5C3B/POLR2D/NBAS/HNRNPU/MAGOH/SMG8/POLR2G/EXOSC10/EXOSC4/EDC3/HNRNPAB/CNOT7/SMG5/SKIV2L/RNPS1/RBM8A	44
BP	GO:0007094	mitotic spindle assembly checkpoint signaling	23/2099	38/18800	3.27171e-13	1.04971e-11	8.74618e-12	ZNF207/SPDL1/TRIP13/NDC80/ZW10/ANAPC15/TTK/IK/MAD2L2/CENPF/ZWINT/MAD2L1BP/PCID2/CCNB1/DYNC1LI1/BUB1B/MAD2L1/PLK1/CDT1/BUB1/ZWILCH/GEN1/AURKB	23
BP	GO:0071173	spindle assembly checkpoint signaling	23/2099	38/18800	3.27171e-13	1.04971e-11	8.74618e-12	ZNF207/SPDL1/TRIP13/NDC80/ZW10/ANAPC15/TTK/IK/MAD2L2/CENPF/ZWINT/MAD2L1BP/PCID2/CCNB1/DYNC1LI1/BUB1B/MAD2L1/PLK1/CDT1/BUB1/ZWILCH/GEN1/AURKB	23
BP	GO:0071174	mitotic spindle checkpoint signaling	23/2099	38/18800	3.27171e-13	1.04971e-11	8.74618e-12	ZNF207/SPDL1/TRIP13/NDC80/ZW10/ANAPC15/TTK/IK/MAD2L2/CENPF/ZWINT/MAD2L1BP/PCID2/CCNB1/DYNC1LI1/BUB1B/MAD2L1/PLK1/CDT1/BUB1/ZWILCH/GEN1/AURKB	23
BP	GO:0051784	negative regulation of nuclear division	28/2099	55/18800	3.41811e-13	1.08961e-11	9.0786e-12	ZNF207/SPDL1/TRIP13/NDC80/ZW10/ANAPC15/FBXO5/TTK/IK/RAD1/MAD2L2/CENPF/ZWINT/MAD2L1BP/PCID2/CCNB1/DYNC1LI1/CHEK1/BUB1B/MAD2L1/RAD21/PLK1/CDT1/BUB1/MTBP/ZWILCH/GEN1/AURKB	28
BP	GO:1902749	regulation of cell cycle G2/M phase transition	41/2099	108/18800	3.57131e-13	1.13114e-11	9.42468e-12	BRCA1/MRE11/ORC1/AURKA/CLSPN/CDC6/CDC7/CDC25B/FZR1/RAD51C/FBXO5/MACROH2A1/CENPF/KIF14/CCNB1/RINT1/CDK4/NABP2/TICRR/DTL/CHEK1/RAD17/PAXIP1/CDC25C/DONSON/NAE1/DBF4B/TOPBP1/CDC25A/RAD21/PLK1/RRM1/CDK1/ATAD5/AURKB/RCC2/NPM1/BRCC3/BLM/PINX1/CCNQ	41
BP	GO:0007098	centrosome cycle	46/2099	131/18800	3.67905e-13	1.15785e-11	9.64718e-12	BRCA1/NDE1/WDR62/NDC80/XPO1/AURKA/RANBP1/KIF3B/CHMP4B/CEP76/CEP72/SSX2IP/NEK2/STIL/CEP250/SGO1/CEP85/HAUS8/NAT10/ODF2/HAUS2/KIF11/BRCA2/PLK4/HAUS6/CHEK1/CENPJ/HAUS1/CETN3/SLC16A1/SASS6/CCNF/PCLAF/PLK1/SAC3D1/CNTROB/CDK1/CKAP5/RTTN/GEN1/NPM1/XRCC2/DCTN1/NUP62/RBM14/HAUS5	46
BP	GO:0006457	protein folding	62/2099	212/18800	4.52967e-13	1.41653e-11	1.18025e-11	FKBP4/NUDCD3/HSPA5/HSP90AA1/DNAJA1/PDRG1/NUDC/DNAJB11/HSP90AB1/ST13/AHSA1/PFDN4/DNAJC5/CSNK2A1/DNAJA3/PDCD5/DNAJC2/CCDC47/GRPEL1/HSPA8/PTGES3/HSPA9/PFDN1/TTC1/CCT4/TXNDC9/PDCL3/TCP1/PRDX4/MKKS/TRAP1/CANX/MPDU1/HSPBP1/CCT7/PPIL1/UNC45A/PDIA6/HSPD1/CCT6A/CCT5/CWC27/VBP1/CCT8/DFFA/CCT3/CHCHD4/GRPEL2/QSOX2/BAG5/CCT2/HSP90B1/DNAJC7/NUDCD2/HSPA4/PPID/TBCA/PPIH/CALR/RUVBL2/HSPA14/PPIA	62
BP	GO:0006378	mRNA polyadenylation	25/2099	45/18800	4.65565e-13	1.44677e-11	1.20545e-11	PAF1/CPSF1/SNRPA/ZC3H14/CSTF2/MTPAP/CPSF6/CPSF3/TENT4B/SYMPK/PNPT1/FIP1L1/CPSF7/RNF20/SSU72/VIRMA/CPSF2/LEO1/NUDT21/CLP1/CSTF3/HSF1/SUPT5H/CTR9/NELFE	25
BP	GO:0006278	RNA-templated DNA biosynthetic process	33/2099	75/18800	5.38846e-13	1.66402e-11	1.38647e-11	MRE11/XRCC5/HSP90AA1/MAPKAPK5/HNRNPC/HSP90AB1/GAR1/PTGES3/CCT4/NEK2/TCP1/TENT4B/GNL3L/DKC1/RPA1/NAT10/HNRNPA1/CCT7/PIF1/WRAP53/NAF1/NHP2/CCT6A/TERF1/CCT5/HNRNPU/CCT8/CCT3/CCT2/EXOSC10/AURKB/SMG5/PINX1	33
BP	GO:0000478	endonucleolytic cleavage involved in rRNA processing	14/2099	15/18800	6.05058e-13	1.83411e-11	1.52818e-11	NOP14/RCL1/UTP20/RPP40/KRI1/UTP23/NOL9/BMS1/TSR1/RPS21/RRS1/TBL3/NOP9/BOP1	14
BP	GO:0000479	endonucleolytic cleavage of tricistronic rRNA transcript (SSU-rRNA, 5.8S rRNA, LSU-rRNA)	14/2099	15/18800	6.05058e-13	1.83411e-11	1.52818e-11	NOP14/RCL1/UTP20/RPP40/KRI1/UTP23/NOL9/BMS1/TSR1/RPS21/RRS1/TBL3/NOP9/BOP1	14
BP	GO:0006271	DNA strand elongation involved in DNA replication	14/2099	15/18800	6.05058e-13	1.83411e-11	1.52818e-11	POLD3/GINS1/POLA1/MCM4/LIG1/POLD2/MCM3/PCNA/RFC3/DNA2/POLE3/RFC4/MCM7/POLE	14
BP	GO:0045931	positive regulation of mitotic cell cycle	45/2099	128/18800	6.3081e-13	1.90051e-11	1.5835e-11	POLDIP2/CDC27/PAFAH1B1/ANAPC5/CDC6/CDC23/CDC7/APEX1/CDC25B/RAD51C/FBXO5/EIF4G1/TTL/CPSF3/STIL/MAD2L1BP/DLGAP5/CCNB1/CDK4/ESPL1/BRCA2/CUL4A/RPTOR/DTL/CDCA5/MEPCE/EIF4E/CENPJ/NSMCE2/SASS6/CDC25C/DBF4B/CDC25A/RRM1/CDT1/CDK1/RRM2/MTBP/UBE2C/RCC2/HSF1/EIF4EBP1/ANAPC7/TFDP1/PHB2	45
BP	GO:0065004	protein-DNA complex assembly	60/2099	203/18800	6.49866e-13	1.94605e-11	1.62145e-11	RAD51/TAF2/TAF11/MCM2/SART3/CDC45/SMARCB1/PSMC6/CENPI/OIP5/BRF2/CHRAC1/PIH1D1/ASF1B/GRWD1/TAF6/UBTF/RAD51C/CAND1/GMNN/TBP/MACROH2A1/CENPA/TAF1B/CENPF/SET/HELLS/CENPK/HJURP/DLGAP5/SMARCA4/TAF4/NASP/ANP32B/POLR1E/CENPO/CENPE/GTF2A2/TERF1/POLE3/TAF5/CENPH/MIS18A/CHAF1B/TAF6L/HMGB2/CENPN/CDT1/CHAF1A/CENPX/TAF7/NPM1/NAP1L1/CENPP/H2AX/HMGB1/CENPW/DAXX/DNAJC9/TAF9	60
BP	GO:2001020	regulation of response to DNA damage stimulus	68/2099	246/18800	6.5553e-13	1.95119e-11	1.62573e-11	KDM1A/BRCA1/DDX11/ERCC8/RAD51/POLQ/TMEM161A/XRCC1/RIF1/FUS/WDR76/THOC5/MRGBP/PSMD10/PIAS4/NSD2/FOXM1/RAD51AP1/TIMELESS/FBXO5/RNF8/FXR1/MAD2L2/WRNIP1/DEK/YEATS4/AUNIP/FXR2/TRIM28/FIGNL1/PCNA/SLF1/DHX9/ACTL6A/MYC/CUL4A/COPS3/WRAP53/PARP1/RPS3/CHEK1/MMS19/PAXIP1/UBQLN4/USP1/HNRNPK/DDIAS/OTUB1/RFWD3/ING2/UBE2V2/TRIAP1/RUVBL1/ATAD5/UBE2N/FANCB/RUVBL2/CHEK2/KMT5A/HSF1/PARPBP/BRCC3/KDM4D/H2AX/HMGB1/PARG…	68
BP	GO:0031577	spindle checkpoint signaling	23/2099	39/18800	7.13197e-13	2.11012e-11	1.75816e-11	ZNF207/SPDL1/TRIP13/NDC80/ZW10/ANAPC15/TTK/IK/MAD2L2/CENPF/ZWINT/MAD2L1BP/PCID2/CCNB1/DYNC1LI1/BUB1B/MAD2L1/PLK1/CDT1/BUB1/ZWILCH/GEN1/AURKB	23
BP	GO:0032204	regulation of telomere maintenance	34/2099	80/18800	8.16332e-13	2.40089e-11	2.00042e-11	UPF1/MRE11/XRCC1/XRCC5/MAPKAPK5/HNRNPC/CCT4/NEK2/YLPM1/TCP1/TENT4B/HNRNPA2B1/GNL3L/DKC1/NAT10/HNRNPA1/CCT7/MYC/HNRNPD/NABP2/PIF1/PARP1/NAF1/CCT6A/TERF1/CCT5/HNRNPU/CCT8/CCT3/CCT2/EXOSC10/AURKB/SMG5/PINX1	34
BP	GO:0043631	RNA polyadenylation	25/2099	46/18800	9.11791e-13	2.66578e-11	2.22113e-11	PAF1/CPSF1/SNRPA/ZC3H14/CSTF2/MTPAP/CPSF6/CPSF3/TENT4B/SYMPK/PNPT1/FIP1L1/CPSF7/RNF20/SSU72/VIRMA/CPSF2/LEO1/NUDT21/CLP1/CSTF3/HSF1/SUPT5H/CTR9/NELFE	25
BP	GO:0043484	regulation of RNA splicing	50/2099	154/18800	1.10155e-12	3.20162e-11	2.66759e-11	PTBP1/THRAP3/U2AF2/JMJD6/DAZAP1/RBM22/FUS/SRPK1/RBM23/SNW1/PQBP1/HNRNPL/C1QBP/ZPR1/HSPA8/PRPF19/NUP98/SRSF9/SRSF3/FXR1/NCL/SRSF7/PRDX6/KHDRBS1/HNRNPA2B1/SMU1/METTL16/FXR2/RBM38/HNRNPA1/SRSF1/TRA2B/NCBP1/RBMX/CELF1/HNRNPU/RRP1B/SRSF2/RAVER1/MAGOH/RBM15/HNRNPK/CDK12/SF1/PUF60/RBM10/SRSF10/RNPS1/RBM12/RBM8A	50
BP	GO:0000086	G2/M transition of mitotic cell cycle	47/2099	140/18800	1.33905e-12	3.86916e-11	3.22378e-11	BRCA1/MRE11/TAF2/ORC1/AURKA/CLSPN/CDC6/CDC7/CDC25B/FZR1/RAD51C/FOXM1/FBXO5/CENPF/KIF14/MASTL/KHDRBS1/CIT/PKMYT1/CCNB1/RINT1/CDK4/NABP2/TICRR/DTL/CALM2/CCNA2/CHEK1/RAD17/CDC25C/DONSON/NAE1/DBF4B/TOPBP1/CDC25A/RAD21/MELK/PLK1/RRM1/CDK1/AURKB/RCC2/CHEK2/BRCC3/BLM/PPME1/PINX1	47
BP	GO:0006360	transcription by RNA polymerase I	27/2099	54/18800	1.58166e-12	4.54358e-11	3.78572e-11	DHX33/DDX11/POLR1A/TCOF1/SMARCB1/PIH1D1/ERCC2/UBTF/MACROH2A1/NCL/WDR75/TAF1B/POLR1G/HEATR1/IPPK/SMARCA4/NOL11/PWP1/POLR1E/TAF1A/LYAR/ERCC3/WDR43/UTP15/MARS1/MAF1/MTOR	27
BP	GO:0008608	attachment of spindle microtubules to kinetochore	22/2099	37/18800	1.79541e-12	5.1278e-11	4.27249e-11	ZNF207/SPAG5/NDC80/SEH1L/ECT2/NEK2/KNSTRN/SGO1/CCNB1/KNL1/CENPE/KIF2C/NUF2/BOD1/SPC25/HNRNPU/RACGAP1/SPC24/CDT1/AURKB/RCC2/CHAMP1	22
BP	GO:0002181	cytoplasmic translation	48/2099	146/18800	1.85387e-12	5.26436e-11	4.38626e-11	RPL26L1/ZC3H15/YBX1/FTSJ1/EIF2B3/RPS5/EIF3I/RPLP0/AARS1/EIF3D/EIF5/RPS16/EIF4H/EIF3A/DRG2/RPS12/EIF4G1/DPH5/ETF1/RPL5/EIF2S2/EIF2S3/RPL27/DPH2/SYNCRIP/DHX9/HNRNPD/DENR/RPS27A/RPL7/EIF3M/RPS3/HNRNPU/RPL8/SLBP/CNBP/RPS21/RPS7/RPL35A/DRG1/RPS4X/RPL23A/RPL10A/MTOR/RPS29/UBA52/RPL41/RPL17	48
BP	GO:0034250	positive regulation of cellular amide metabolic process	52/2099	167/18800	2.44067e-12	6.89107e-11	5.74164e-11	YBX1/ELAVL1/POLDIP3/EIF3D/PCIF1/CDK5RAP1/EIF3E/C1QBP/MRPS27/FXR1/EIF4G1/FASTKD2/TENT4B/KHDRBS1/RPL5/AGO2/FASTKD3/UPF3B/FXR2/NSUN5/EIF2S3/EIF5A/SYNCRIP/NAT10/DHX9/METTL5/HNRNPD/TARBP2/EIF4A3/POLR2D/EIF2B5/YTHDF1/CDC123/HNRNPU/LARP1/RPUSD3/LARP4/RPUSD4/TRUB2/EEF2/POLR2G/CNBP/TRMT10C/RPS6KB2/NPM1/EIF3C/RPS4X/MTOR/EIF6/PRKDC/MPV17L2/RCC1L	52
BP	GO:0006282	regulation of DNA repair	49/2099	152/18800	2.49299e-12	6.97158e-11	5.80872e-11	KDM1A/BRCA1/DDX11/ERCC8/RAD51/POLQ/TMEM161A/XRCC1/RIF1/FUS/MRGBP/NSD2/FOXM1/RAD51AP1/TIMELESS/RNF8/MAD2L2/WRNIP1/DEK/YEATS4/AUNIP/TRIM28/FIGNL1/PCNA/SLF1/DHX9/ACTL6A/CUL4A/WRAP53/PARP1/RPS3/CHEK1/MMS19/UBQLN4/USP1/OTUB1/UBE2V2/RUVBL1/UBE2N/FANCB/RUVBL2/HSF1/PARPBP/BRCC3/KDM4D/H2AX/HMGB1/PARG/PRKDC	49
BP	GO:1901992	positive regulation of mitotic cell cycle phase transition	38/2099	100/18800	2.49741e-12	6.97158e-11	5.80872e-11	CDC27/ANAPC5/CDC6/CDC23/CDC7/APEX1/CDC25B/RAD51C/FBXO5/EIF4G1/CPSF3/STIL/MAD2L1BP/DLGAP5/CCNB1/CDK4/ESPL1/CUL4A/RPTOR/DTL/CDCA5/MEPCE/CENPJ/NSMCE2/SASS6/CDC25C/DBF4B/CDC25A/RRM1/CDT1/CDK1/RRM2/MTBP/UBE2C/RCC2/ANAPC7/TFDP1/PHB2	38
BP	GO:0045943	positive regulation of transcription by RNA polymerase I	17/2099	23/18800	3.19626e-12	8.87232e-11	7.39242e-11	DHX33/DDX11/SMARCB1/PIH1D1/UBTF/NCL/WDR75/HEATR1/IPPK/SMARCA4/NOL11/PWP1/LYAR/WDR43/UTP15/MARS1/MTOR	17
BP	GO:0072655	establishment of protein localization to mitochondrion	42/2099	120/18800	4.36602e-12	1.20517e-10	1.00415e-10	RALA/AGK/MIPEP/USP36/TIMM21/HSP90AA1/DNAJA1/HUWE1/TIMM13/TOMM22/SAMM50/TIMM9/TIMM44/PDCD5/TIMM50/PMPCB/GRPEL1/HTRA2/MFN2/TIMM8A/TOMM40/AP3B1/TIMM17A/TIMM10/NMT1/SAE1/TIMM29/HAX1/HSPD1/TIMM8B/TOMM70/OXA1L/AIFM1/MAIP1/CHCHD4/GRPEL2/PMPCA/HSPA4/TOMM20/TIMM22/UBE2L3/TIMM23	42
BP	GO:0070585	protein localization to mitochondrion	43/2099	125/18800	4.73831e-12	1.30066e-10	1.08371e-10	RALA/AGK/MIPEP/USP36/TIMM21/HSP90AA1/DNAJA1/HUWE1/TIMM13/TOMM22/SAMM50/TIMM9/TIMM44/PDCD5/TIMM50/PMPCB/GRPEL1/MTCH2/HTRA2/MFN2/TIMM8A/TOMM40/AP3B1/TIMM17A/TIMM10/NMT1/SAE1/TIMM29/HAX1/HSPD1/TIMM8B/TOMM70/OXA1L/AIFM1/MAIP1/CHCHD4/GRPEL2/PMPCA/HSPA4/TOMM20/TIMM22/UBE2L3/TIMM23	43
BP	GO:0006367	transcription initiation from RNA polymerase II promoter	33/2099	80/18800	4.80846e-12	1.31263e-10	1.09368e-10	E2F2/MED24/ELOA/TAF2/TAF11/PSMC6/MAZ/MED26/TAF6/CAND1/TBP/SUB1/GTF2F1/MED1/TAF4/CDK7/CDK4/GTF2A2/TAF4B/POLR2D/TAF5/GTF2E1/ELOC/PAXIP1/TAF6L/ERCC3/MED30/POLR2G/TAF7/MED14/HMGB1/GTF2E2/TAF9	33
BP	GO:1904814	regulation of protein localization to chromosome, telomeric region	13/2099	14/18800	5.08876e-12	1.38151e-10	1.15108e-10	MACROH2A1/CCT4/TCP1/GNL3L/DKC1/CCT7/WRAP53/CCT6A/TERF1/CCT5/CCT8/CCT3/CCT2	13
BP	GO:0051205	protein insertion into membrane	28/2099	60/18800	5.28839e-12	1.42787e-10	1.1897e-10	AGK/HSP90AA1/TIMM13/TOMM22/SAMM50/TIMM9/EMC9/UBL4A/SGTA/PDCD5/CCDC47/TIMM8A/EMC1/EMC4/EMC8/TIMM10/NMT1/TIMM29/TIMM8B/TOMM70/OXA1L/MAIP1/CAMLG/MMGT1/HSPA4/TIMM22/GET3/BAG6	28
BP	GO:0031023	microtubule organizing center organization	47/2099	145/18800	5.57879e-12	1.49809e-10	1.24821e-10	PAFAH1B1/BRCA1/NDE1/WDR62/NDC80/XPO1/AURKA/RANBP1/KIF3B/CHMP4B/CEP76/CEP72/SSX2IP/NEK2/STIL/CEP250/SGO1/CEP85/HAUS8/NAT10/ODF2/HAUS2/KIF11/BRCA2/PLK4/HAUS6/CHEK1/CENPJ/HAUS1/CETN3/SLC16A1/SASS6/CCNF/PCLAF/PLK1/SAC3D1/CNTROB/CDK1/CKAP5/RTTN/GEN1/NPM1/XRCC2/DCTN1/NUP62/RBM14/HAUS5	47
BP	GO:0006450	regulation of translational fidelity	16/2099	21/18800	6.5002e-12	1.73608e-10	1.4465e-10	LARS2/IARS2/RPS5/AARS1/CDK5RAP1/DNAJC2/AARS2/DTD1/DTD2/EIF2S3/LARS1/TARS2/IARS1/YRDC/VARS1/GATC	16
BP	GO:0009060	aerobic respiration	55/2099	187/18800	7.32158e-12	1.94494e-10	1.62053e-10	NDUFAB1/COX10/MDH1/NDUFS1/CS/MTFR1/DLD/FH/MSH2/ACO2/IDH3B/OGDH/CHCHD2/ATP5F1B/COX7A2L/PARK7/ATP5PB/SDHB/DLST/PANK2/PDHA1/CCNB1/NDUFB5/MYC/SDHC/MTFR2/MDH2/NIPSNAP2/NDUFB9/DLAT/ATP5F1A/OXA1L/NDUFS2/SUCLG1/NDUFB6/VCP/STOML2/ATP5F1C/GHITM/NDUFV1/UQCRFS1/CDK1/SLC25A33/CYCS/TEFM/UQCRH/C2orf69/COX5A/CYC1/SHMT2/NDUFA12/NDUFA6/NDUFA4/UQCC3/NDUFS3	55
BP	GO:2000573	positive regulation of DNA biosynthetic process	31/2099	73/18800	8.5063e-12	2.24757e-10	1.87268e-10	RFC2/XRCC5/HSP90AA1/MAPKAPK5/HSP90AB1/GINS1/PTGES3/RFC5/CCT4/NEK2/TCP1/DKC1/GINS2/PCNA/RFC3/HNRNPA1/CCT7/DSCC1/MYC/WRAP53/NVL/NAF1/CCT6A/GINS4/CCT5/CCT8/CCT3/RFC4/CCT2/AURKB/GINS3	31
BP	GO:0090307	mitotic spindle assembly	30/2099	69/18800	8.87156e-12	2.33162e-10	1.9427e-10	POLDIP2/ZNF207/KIF2A/SMC1A/TPX2/KIF4A/AAAS/MYBL2/KIF3B/CHMP4B/BCCIP/SMC3/KPNB1/WRAP73/CDC20/NEK2/STAG1/KIF23/KIF11/HNRNPU/CCSAP/RACGAP1/KIF15/PLK1/AURKB/CHEK2/DRG1/MZT1/KIFC1/LSM14A	30
BP	GO:0140013	meiotic nuclear division	55/2099	188/18800	9.241e-12	2.41586e-10	2.0129e-10	MRE11/NCAPH2/RAD51/NDC1/ASPM/TRIP13/NDC80/RAD54L/AURKA/CCNB1IP1/CDC25B/CCNE1/FZR1/RAD51C/RAD51AP1/FBXO5/TTK/RAD1/SMC4/CDC20/MASTL/NCAPH/KIF18A/CKS2/SGO1/PSMC3IP/TOP2A/FIGNL1/ESPL1/BRIP1/SMC2/BRCA2/NUF2/FANCD2/TERF1/INCENP/EME1/BUB1B/CCNB2/SGO2/PTTG1/RAD21/WASHC5/PLK1/ING2/BUB1/CENPX/CCNE2/CALR/RAD51D/PSMD13/FANCA/FANCM/EHMT2/BAG6	55
BP	GO:0070129	regulation of mitochondrial translation	17/2099	24/18800	9.81361e-12	2.55205e-10	2.12637e-10	ALKBH1/MTG2/CDK5RAP1/C1QBP/MRPS27/FASTKD2/FASTKD3/TACO1/LRPPRC/MALSU1/RPUSD3/RPUSD4/TRUB2/TRMT10C/SHMT2/MPV17L2/RCC1L	17
BP	GO:0006284	base-excision repair	23/2099	43/18800	1.16231e-11	3.0068e-10	2.50527e-10	POLQ/POLD1/NTHL1/XRCC1/UNG/HUWE1/APEX1/LIG1/RPA3/NEIL3/MBD4/PARP2/RPA1/PCNA/DNA2/TDG/POLG/RPS3/FEN1/APEX2/POLE/PRMT6/PARG	23
BP	GO:0090670	RNA localization to Cajal body	15/2099	19/18800	1.24795e-11	3.16212e-10	2.63468e-10	CCT4/TCP1/DKC1/CCT7/WRAP53/NAF1/NHP2/CCT6A/CCT5/CCT8/CCT3/CCT2/EXOSC10/RUVBL1/RUVBL2	15
BP	GO:0090671	telomerase RNA localization to Cajal body	15/2099	19/18800	1.24795e-11	3.16212e-10	2.63468e-10	CCT4/TCP1/DKC1/CCT7/WRAP53/NAF1/NHP2/CCT6A/CCT5/CCT8/CCT3/CCT2/EXOSC10/RUVBL1/RUVBL2	15
BP	GO:0090672	telomerase RNA localization	15/2099	19/18800	1.24795e-11	3.16212e-10	2.63468e-10	CCT4/TCP1/DKC1/CCT7/WRAP53/NAF1/NHP2/CCT6A/CCT5/CCT8/CCT3/CCT2/EXOSC10/RUVBL1/RUVBL2	15
BP	GO:0090685	RNA localization to nucleus	15/2099	19/18800	1.24795e-11	3.16212e-10	2.63468e-10	CCT4/TCP1/DKC1/CCT7/WRAP53/NAF1/NHP2/CCT6A/CCT5/CCT8/CCT3/CCT2/EXOSC10/RUVBL1/RUVBL2	15
BP	GO:0043487	regulation of RNA stability	51/2099	170/18800	1.87258e-11	4.72062e-10	3.93322e-10	UPF1/NSUN2/THRAP3/YBX1/ELAVL1/EXOSC5/CNOT3/KHSRP/FUS/HNRNPC/HNRNPM/ZC3H14/APEX1/E2F1/DDX49/EXOSC3/FXR1/FASTKD2/TARDBP/TENT4B/ZCCHC17/EXOSC9/AGO2/FASTKD3/PCID2/METTL16/FXR2/EXOSC2/DKC1/SYNCRIP/DHX9/TBRG4/PNPT1/FASTKD1/HNRNPD/NT5C3B/SERBP1/POLR2D/NAF1/CELF1/YTHDF1/HNRNPU/LARP1/ZC3H18/PHAX/POLR2G/HNRNPA0/NPM1/RBM10/CNOT7/FASTKD5	51
BP	GO:0010389	regulation of G2/M transition of mitotic cell cycle	36/2099	97/18800	2.09244e-11	5.24809e-10	4.37271e-10	BRCA1/MRE11/ORC1/AURKA/CLSPN/CDC6/CDC7/CDC25B/FZR1/RAD51C/FBXO5/CENPF/KIF14/CCNB1/RINT1/CDK4/NABP2/TICRR/DTL/CHEK1/RAD17/CDC25C/DONSON/NAE1/DBF4B/TOPBP1/CDC25A/RAD21/PLK1/RRM1/CDK1/AURKB/RCC2/BRCC3/BLM/PINX1	36
BP	GO:0007062	sister chromatid cohesion	28/2099	63/18800	2.29163e-11	5.71866e-10	4.76479e-10	DDX11/MRE11/SMC1A/KIF22/SMC3/RAD51C/MACROH2A1/SFPQ/CDC20/STAG1/NAA50/SGO1/SLF1/ESPL1/DSCC1/BOD1/CDCA5/NSMCE2/BUB1B/SGO2/RAD21/PLK1/FEN1/BUB1/ESCO2/HASPIN/MCMBP/PHB2	28
BP	GO:0010498	proteasomal protein catabolic process	106/2099	496/18800	2.37951e-11	5.90812e-10	4.92265e-10	CDC27/PSMB1/PSMC4/PSMA4/HSPA5/ERCC8/CUL1/USP13/PSME4/UFD1/ITCH/KEAP1/PCNP/XPO1/HUWE1/AURKA/EDEM2/ANAPC5/CDC23/HSP90AB1/PSMD8/FOXRED2/DESI1/PSMC6/PSMA3/PSMC1/PSMB5/TRPC4AP/PSMA7/GID8/TRIB3/HM13/USP14/PSMD10/PSMD7/AXIN1/BFAR/SGTA/FZR1/DMAC2/CUL2/UBE2S/CCDC47/PRPF19/USP5/PSMD14/AUP1/SUMO1/PARK7/UCHL5/CDC20/KIF14/AREL1/PSMF1/PSMB2/CANX/PSME3/UBE2G1/HSPBP1/UBQLN1/NUDT15/PSMB7/DERL1/PLAA/RNF121/BBS7/CU…	106
BP	GO:0045333	cellular respiration	62/2099	231/18800	2.66468e-11	6.58309e-10	5.48503e-10	NDUFAB1/SLC25A13/COX10/MDH1/NDUFS1/CS/MTFR1/NOA1/DLD/FH/MSH2/ACO2/IDH3B/OGDH/CHCHD2/ATP5F1B/COX7A2L/PARK7/ATP5PB/SDHB/DLST/PANK2/TRAP1/PDHA1/MYBBP1A/CCNB1/NDUFB5/MYC/PNPT1/SDHC/MTFR2/MDH2/NIPSNAP2/NDUFB9/DLAT/ATP5F1A/OXA1L/NDUFS2/SUCLG1/NDUFB6/VCP/STOML2/ATP5F1C/GHITM/NDUFV1/UQCRFS1/PRELID1/CDK1/SLC25A33/CYCS/TEFM/UQCRH/SLC25A22/C2orf69/COX5A/CYC1/SHMT2/NDUFA12/NDUFA6/NDUFA4/UQCC3/NDUFS3	62
BP	GO:0016556	mRNA modification	18/2099	28/18800	2.95296e-11	7.259e-10	6.0482e-10	NSUN2/TRMT6/DNAJB11/PUS7/PCIF1/CBLL1/PUS3/METTL8/METTL16/DKC1/VIRMA/RPUSD2/TRMT61A/TRUB2/TRMT61B/TRMT10C/PUS1/HNRNPAB	18
BP	GO:0070203	regulation of establishment of protein localization to telomere	11/2099	11/18800	3.28301e-11	8.03038e-10	6.69091e-10	CCT4/TCP1/DKC1/CCT7/WRAP53/CCT6A/TERF1/CCT5/CCT8/CCT3/CCT2	11
BP	GO:1901991	negative regulation of mitotic cell cycle phase transition	53/2099	183/18800	3.34886e-11	8.1511e-10	6.7915e-10	ZNF207/BRCA1/MRE11/SPDL1/TRIP13/GTSE1/RBL1/NDC80/ORC1/ZW10/CLSPN/CDC6/FZR1/EZH2/ANAPC15/FBXO5/TTK/IK/MAD2L2/CENPF/ZWINT/MAD2L1BP/PCID2/CCNB1/RINT1/NABP2/TICRR/DTL/DYNC1LI1/CHEK1/RAD17/BUB1B/DONSON/NAE1/TOPBP1/MAD2L1/RAD21/E2F7/BRD7/PLK1/CDT1/RFWD3/BUB1/CDK1/TRIAP1/ZWILCH/GEN1/AURKB/CHEK2/BRCC3/BLM/PRKDC/PINX1	53
BP	GO:0000463	maturation of LSU-rRNA from tricistronic rRNA transcript (SSU-rRNA, 5.8S rRNA, LSU-rRNA)	13/2099	15/18800	3.42328e-11	8.25094e-10	6.87468e-10	DDX18/PES1/GTPBP4/FTSJ3/WDR12/URB1/RPL7L1/RPL7/NIFK/NOL9/RPF2/BOP1/ZNHIT3	13
BP	GO:1904874	positive regulation of telomerase RNA localization to Cajal body	13/2099	15/18800	3.42328e-11	8.25094e-10	6.87468e-10	CCT4/TCP1/DKC1/CCT7/NAF1/NHP2/CCT6A/CCT5/CCT8/CCT3/CCT2/RUVBL1/RUVBL2	13
BP	GO:0061013	regulation of mRNA catabolic process	51/2099	173/18800	3.83003e-11	9.18649e-10	7.65419e-10	UPF1/THRAP3/YBX1/ELAVL1/EXOSC5/CNOT3/KHSRP/FUS/HNRNPC/HNRNPM/ZC3H14/APEX1/E2F1/EXOSC3/CASC3/FXR1/FASTKD2/TARDBP/TENT4B/EXOSC9/AGO2/FASTKD3/PCID2/METTL16/FXR2/EXOSC2/SYNCRIP/DHX9/TBRG4/PNPT1/FASTKD1/HNRNPD/EIF4A3/NT5C3B/SERBP1/POLR2D/CELF1/YTHDF1/NBAS/HNRNPU/LARP1/MAGOH/POLR2G/HNRNPA0/NPM1/RBM10/PKP3/HNRNPAB/CNOT7/FASTKD5/RBM8A	51
BP	GO:0000963	mitochondrial RNA processing	15/2099	20/18800	4.47349e-11	1.0678e-09	8.89694e-10	ELAC2/HSD17B10/CDK5RAP1/FASTKD2/FASTKD3/TRMT5/TBRG4/PNPT1/FASTKD1/SUPV3L1/RPUSD4/TRMT61B/TRMT10C/PUS1/FASTKD5	15
BP	GO:0045005	DNA-templated DNA replication maintenance of fidelity	24/2099	49/18800	4.8194e-11	1.14382e-09	9.5303e-10	DDX11/MRE11/RAD51/POLD1/TIPIN/EXD2/TIMELESS/ZRANB3/PCNA/DNA2/SMARCAL1/BRCA2/MMS22L/EME1/DONSON/TONSL/RFWD3/CENPX/POLE/GEN1/ALYREF/TRAIP/FANCM/BLM	24
BP	GO:0042770	signal transduction in response to DNA damage	51/2099	174/18800	4.83826e-11	1.14382e-09	9.5303e-10	KDM1A/BRCA1/MRE11/TIPIN/GTSE1/TFAP4/WDR76/CLSPN/MSH2/CDC5L/THOC5/E2F1/PSMD10/USP10/DOT1L/FZR1/PRPF19/FOXM1/RAD1/MAD2L2/RINT1/BRIP1/MDC1/BRCA2/CUL4A/TICRR/COPS3/TIPRL/DTL/INTS7/FANCD2/CHEK1/RAD17/EME1/PAXIP1/DONSON/TOPBP1/ATRIP/E2F7/PLK1/RFWD3/CDK1/TRIAP1/RHNO1/ATAD5/CHEK2/KMT5A/BRCC3/H2AX/BLM/PRKDC	51
BP	GO:0032210	regulation of telomere maintenance via telomerase	25/2099	53/18800	5.42403e-11	1.2762e-09	1.06333e-09	XRCC5/MAPKAPK5/HNRNPC/CCT4/NEK2/TCP1/TENT4B/GNL3L/DKC1/NAT10/HNRNPA1/CCT7/PIF1/NAF1/CCT6A/TERF1/CCT5/HNRNPU/CCT8/CCT3/CCT2/EXOSC10/AURKB/SMG5/PINX1	25
BP	GO:1903320	regulation of protein modification by small protein conjugation or removal	64/2099	246/18800	5.47602e-11	1.28232e-09	1.06843e-09	KDM1A/SPRTN/BRCA1/PHF23/HSPA5/U2AF2/SART3/ITCH/HSP90AA1/DNAJA1/HUWE1/HSP90AB1/TRIB3/PSMD10/AXIN1/PIAS4/FZR1/AIMP2/GTPBP4/UBE2S/FBXO5/PARK7/MAD2L2/CDC20/MASTL/RPL5/UBA2/GNL3L/PRR7/HSPBP1/UBQLN1/DERL1/PLAA/DCUN1D5/FANCI/SAE1/TBC1D7/RPS3/RNF20/BUB1B/PAXIP1/MAD2L1/CAMLG/VCP/BAG5/PLK1/OTUB1/UBE2V2/CENPX/HDAC3/RPS7/MTBP/UBXN2A/GLMN/UBE2C/UBE2N/AMER1/PRMT3/UBE2L3/FANCM/PPIA/CTR9/DAXX/PINX1	64
BP	GO:1904356	regulation of telomere maintenance via telomere lengthening	27/2099	61/18800	5.85229e-11	1.36397e-09	1.13646e-09	XRCC5/MAPKAPK5/HNRNPC/CCT4/NEK2/TCP1/TENT4B/HNRNPA2B1/GNL3L/DKC1/NAT10/HNRNPA1/CCT7/PIF1/PARP1/NAF1/CCT6A/TERF1/CCT5/HNRNPU/CCT8/CCT3/CCT2/EXOSC10/AURKB/SMG5/PINX1	27
BP	GO:0031396	regulation of protein ubiquitination	58/2099	213/18800	6.21184e-11	1.44097e-09	1.20062e-09	KDM1A/SPRTN/BRCA1/PHF23/HSPA5/U2AF2/HSP90AA1/DNAJA1/HUWE1/HSP90AB1/TRIB3/PSMD10/AXIN1/FZR1/AIMP2/GTPBP4/UBE2S/FBXO5/PARK7/MAD2L2/CDC20/MASTL/RPL5/GNL3L/PRR7/HSPBP1/UBQLN1/DERL1/PLAA/DCUN1D5/FANCI/TBC1D7/RPS3/RNF20/BUB1B/PAXIP1/MAD2L1/CAMLG/BAG5/PLK1/OTUB1/UBE2V2/CENPX/HDAC3/RPS7/MTBP/UBXN2A/GLMN/UBE2C/UBE2N/AMER1/PRMT3/UBE2L3/FANCM/PPIA/CTR9/DAXX/PINX1	58
BP	GO:0070199	establishment of protein localization to chromosome	17/2099	26/18800	7.10571e-11	1.64062e-09	1.36697e-09	PIH1D1/MACROH2A1/CCT4/TCP1/DKC1/CCT7/NABP2/BRCA2/WRAP53/CCT6A/TERF1/CCT5/CCT8/LRWD1/CCT3/CCT2/RUVBL2	17
BP	GO:1990542	mitochondrial transmembrane transport	33/2099	87/18800	7.2149e-11	1.65808e-09	1.38152e-09	SLC25A13/SLC25A5/MCUR1/TIMM21/SLC25A3/SLC25A15/TIMM44/TIMM50/PMPCB/GRPEL1/MRPL18/MRS2/TOMM40/ABCB7/TIMM17A/PNPT1/AFG3L2/HSPD1/TOMM70/AIFM1/MAIP1/CHCHD4/CCDC51/GRPEL2/SFXN1/STOML2/LETM1/SLC25A33/TOMM20/SLC25A22/SFXN4/VDAC1/TIMM23	33
BP	GO:0000077	DNA damage checkpoint signaling	39/2099	115/18800	7.55481e-11	1.72816e-09	1.43991e-09	BRCA1/MRE11/TIPIN/GTSE1/WDR76/CLSPN/MSH2/CDC5L/THOC5/E2F1/DOT1L/FZR1/PRPF19/RAD1/RINT1/BRIP1/MDC1/CUL4A/TICRR/TIPRL/DTL/INTS7/FANCD2/CHEK1/RAD17/EME1/DONSON/TOPBP1/ATRIP/PLK1/RFWD3/CDK1/TRIAP1/RHNO1/CHEK2/BRCC3/H2AX/BLM/PRKDC	39
BP	GO:0006626	protein targeting to mitochondrion	36/2099	101/18800	8.03891e-11	1.83043e-09	1.52511e-09	AGK/MIPEP/USP36/TIMM21/HSP90AA1/HUWE1/TIMM13/TOMM22/SAMM50/TIMM9/TIMM44/PDCD5/TIMM50/PMPCB/GRPEL1/HTRA2/MFN2/TIMM8A/TOMM40/TIMM17A/TIMM10/SAE1/TIMM29/HAX1/HSPD1/TIMM8B/TOMM70/AIFM1/CHCHD4/GRPEL2/PMPCA/HSPA4/TOMM20/TIMM22/UBE2L3/TIMM23	36
BP	GO:0001510	RNA methylation	32/2099	83/18800	8.47624e-11	1.92115e-09	1.6007e-09	NSUN2/METTL1/FTSJ1/BUD23/HSD17B10/DIMT1/METTL2A/TRMT6/PCIF1/FBL/CBLL1/FTSJ3/THADA/METTL8/EMG1/TRMT5/METTL16/GTPBP3/NSUN5/TGS1/METTL5/MEPCE/WDR4/HENMT1/RBM15/TFB2M/VIRMA/TRMT61A/TRMT61B/TRMT10C/TRMT12/METTL6	32
BP	GO:0042790	nucleolar large rRNA transcription by RNA polymerase I	14/2099	18/18800	8.8939e-11	1.99749e-09	1.66431e-09	DDX11/TCOF1/SMARCB1/PIH1D1/MACROH2A1/NCL/TAF1B/IPPK/SMARCA4/NOL11/PWP1/POLR1E/MARS1/MTOR	14
BP	GO:1904872	regulation of telomerase RNA localization to Cajal body	14/2099	18/18800	8.8939e-11	1.99749e-09	1.66431e-09	CCT4/TCP1/DKC1/CCT7/NAF1/NHP2/CCT6A/CCT5/CCT8/CCT3/CCT2/EXOSC10/RUVBL1/RUVBL2	14
BP	GO:0006356	regulation of transcription by RNA polymerase I	19/2099	33/18800	1.30664e-10	2.92133e-09	2.43405e-09	DHX33/DDX11/SMARCB1/PIH1D1/UBTF/MACROH2A1/NCL/WDR75/HEATR1/IPPK/SMARCA4/NOL11/PWP1/LYAR/WDR43/UTP15/MARS1/MAF1/MTOR	19
BP	GO:0007006	mitochondrial membrane organization	39/2099	117/18800	1.36231e-10	3.03207e-09	2.52632e-09	SLC25A5/AGK/DNAJC11/HSP90AA1/TIMM13/TOMM22/SAMM50/TIMM9/PDCD5/TIMM50/CHCHD3/HSPA9/MFN2/TIMM8A/IMMT/AP3B1/TIMM10/NMT1/MYC/PEX5/AFG3L2/TIMM29/TIMM8B/TOMM70/OXA1L/CHCHD6/MAIP1/VDAC2/GHITM/LETM1/HSPA4/NAIF1/MTX1/TIMM22/APOO/FZD9/OPA1/UQCC3/RCC1L	39
BP	GO:0090151	establishment of protein localization to mitochondrial membrane	18/2099	30/18800	1.56026e-10	3.45705e-09	2.88041e-09	AGK/HSP90AA1/TIMM13/TOMM22/SAMM50/TIMM9/PDCD5/TIMM8A/AP3B1/TIMM10/NMT1/TIMM29/TIMM8B/TOMM70/OXA1L/MAIP1/HSPA4/TIMM22	18
BP	GO:0033108	mitochondrial respiratory chain complex assembly	34/2099	94/18800	1.69453e-10	3.7212e-09	3.1005e-09	NDUFAB1/NDUFS1/TIMM21/SAMM50/UQCC1/DMAC2/COA1/TFAM/FOXRED1/NDUFAF4/FASTKD3/TACO1/NDUFB5/NDUFB11/NDUFB9/OXA1L/NDUFAF6/AIFM1/NDUFS2/CHCHD4/NDUFAF2/NDUFB6/UQCRFS1/SLC25A33/ACAD9/COA4/NDUFA12/TMEM186/NDUFA6/SDHAF3/UQCC3/C12orf73/SDHAF1/NDUFS3	34
BP	GO:1903312	negative regulation of mRNA metabolic process	34/2099	94/18800	1.69453e-10	3.7212e-09	3.1005e-09	PTBP1/THRAP3/U2AF2/YBX1/ELAVL1/FUS/HNRNPC/ZC3H14/E2F1/C1QBP/SRSF9/SRSF7/TARDBP/TENT4B/HNRNPA2B1/METTL16/SYNCRIP/DHX9/HNRNPD/RBMX/NBAS/HNRNPU/LARP1/RNF20/HNRNPK/HNRNPA0/RBM10/PKP3/SRSF10/SUPT5H/HNRNPAB/CTR9/NELFE/RNPS1	34
BP	GO:0006997	nucleus organization	43/2099	138/18800	1.84387e-10	4.03122e-09	3.35882e-09	PAFAH1B1/DDX11/USP36/NDC1/PSME4/NUP133/SEH1L/SRPK1/VRK1/CHMP4B/SUV39H1/EMD/NUP93/ZPR1/NUP98/NUP107/RNF8/LMNB1/NUP155/SUMO1/TARDBP/NUP153/POLR1B/EMG1/NUP54/WRAP53/SERBP1/CHEK1/AHCTF1/NUP205/NUP35/HMGB2/NOLC1/PLK1/NEMP1/SF1/CDK1/UBXN2A/BANF1/BEND3/RCC1/PITPNB/DCTN1	43
BP	GO:0006446	regulation of translational initiation	31/2099	81/18800	2.0735e-10	4.51329e-09	3.76048e-09	DDX1/MTIF2/EIF2AK1/ALKBH1/EIF5/EIF3E/EIF3B/EIF4H/EIF4G1/GLE1/EIF2B2/PAIP2/KHDRBS1/AGO2/EIF2S1/BZW2/NCBP1/POLR2D/EIF2B5/EIF3H/YTHDF1/CDC123/LARP1/POLR2G/PPP1CA/EIF1/RPS6KB2/EIF3K/NPM1/EIF4EBP1/MTOR	31
BP	GO:0000054	ribosomal subunit export from nucleus	12/2099	14/18800	2.67427e-10	5.74503e-09	4.78676e-09	LSG1/RIOK2/XPO1/NUP88/RAN/LTV1/ABCE1/RRS1/NPM1/NOP9/SDAD1/EIF6	12
BP	GO:0033750	ribosome localization	12/2099	14/18800	2.67427e-10	5.74503e-09	4.78676e-09	LSG1/RIOK2/XPO1/NUP88/RAN/LTV1/ABCE1/RRS1/NPM1/NOP9/SDAD1/EIF6	12
BP	GO:1902969	mitotic DNA replication	12/2099	14/18800	2.67427e-10	5.74503e-09	4.78676e-09	RTF2/RAD51/MCM2/MCM6/CDC45/GINS1/POLA1/MCM4/LIG1/MCM3/BRCA2/GINS3	12
BP	GO:1901838	positive regulation of transcription of nucleolar large rRNA by RNA polymerase I	10/2099	10/18800	2.95298e-10	6.28909e-09	5.24007e-09	DDX11/SMARCB1/PIH1D1/NCL/IPPK/SMARCA4/NOL11/PWP1/MARS1/MTOR	10
BP	GO:1904851	positive regulation of establishment of protein localization to telomere	10/2099	10/18800	2.95298e-10	6.28909e-09	5.24007e-09	CCT4/TCP1/DKC1/CCT7/WRAP53/CCT6A/CCT5/CCT8/CCT3/CCT2	10
BP	GO:0034501	protein localization to kinetochore	14/2099	19/18800	3.03026e-10	6.3985e-09	5.33123e-09	SPDL1/NDC80/ZW10/TTK/IK/KNL1/CDT1/CDK1/MTBP/ZWILCH/HASPIN/AURKB/RCC2/CHAMP1	14
BP	GO:1903083	protein localization to condensed chromosome	14/2099	19/18800	3.03026e-10	6.3985e-09	5.33123e-09	SPDL1/NDC80/ZW10/TTK/IK/KNL1/CDT1/CDK1/MTBP/ZWILCH/HASPIN/AURKB/RCC2/CHAMP1	14
BP	GO:0043161	proteasome-mediated ubiquitin-dependent protein catabolic process	90/2099	414/18800	3.08794e-10	6.49255e-09	5.40959e-09	CDC27/PSMC4/HSPA5/ERCC8/CUL1/UFD1/ITCH/KEAP1/PCNP/XPO1/HUWE1/AURKA/EDEM2/ANAPC5/CDC23/HSP90AB1/PSMD8/FOXRED2/DESI1/PSMC6/PSMC1/TRPC4AP/GID8/TRIB3/USP14/PSMD10/PSMD7/AXIN1/BFAR/SGTA/FZR1/DMAC2/CUL2/UBE2S/CCDC47/USP5/PSMD14/AUP1/SUMO1/PARK7/UCHL5/CDC20/KIF14/AREL1/PSMF1/CANX/UBE2G1/HSPBP1/UBQLN1/DERL1/PLAA/RNF121/BBS7/CUL4A/DTL/TLK2/EIF3H/ANAPC1/RMND5A/FBXL18/PSMD4/UBQLN4/PSMC2/CCNF/CAMLG/VCP/PSMC3…	90
BP	GO:0070202	regulation of establishment of protein localization to chromosome	11/2099	12/18800	3.53829e-10	7.31494e-09	6.09481e-09	CCT4/TCP1/DKC1/CCT7/WRAP53/CCT6A/TERF1/CCT5/CCT8/CCT3/CCT2	11
BP	GO:1903405	protein localization to nuclear body	11/2099	12/18800	3.53829e-10	7.31494e-09	6.09481e-09	CCT4/TCP1/DKC1/CCT7/WRAP53/CCT6A/MEPCE/CCT5/CCT8/CCT3/CCT2	11
BP	GO:1904816	positive regulation of protein localization to chromosome, telomeric region	11/2099	12/18800	3.53829e-10	7.31494e-09	6.09481e-09	CCT4/TCP1/GNL3L/DKC1/CCT7/WRAP53/CCT6A/CCT5/CCT8/CCT3/CCT2	11
BP	GO:1904867	protein localization to Cajal body	11/2099	12/18800	3.53829e-10	7.31494e-09	6.09481e-09	CCT4/TCP1/DKC1/CCT7/WRAP53/CCT6A/MEPCE/CCT5/CCT8/CCT3/CCT2	11
BP	GO:0098781	ncRNA transcription	25/2099	57/18800	3.81016e-10	7.84416e-09	6.53575e-09	DDX11/TCOF1/SMARCB1/PIH1D1/NPM3/MACROH2A1/NCL/GTF3C2/TAF1B/POLR1G/GTF3C3/GTF3C4/POLR1B/IPPK/SMARCA4/NOL11/CDK7/PWP1/POLR1E/ZC3H8/MEPCE/GTF3C5/NIFK/MARS1/MTOR	25
BP	GO:0062125	regulation of mitochondrial gene expression	17/2099	28/18800	3.91746e-10	8.03161e-09	6.69194e-09	ALKBH1/MTG2/CDK5RAP1/C1QBP/MRPS27/FASTKD2/FASTKD3/TACO1/LRPPRC/MALSU1/RPUSD3/RPUSD4/TRUB2/TRMT10C/SHMT2/MPV17L2/RCC1L	17
BP	GO:0045930	negative regulation of mitotic cell cycle	60/2099	234/18800	4.05431e-10	8.27782e-09	6.89708e-09	ZNF207/BRCA1/MRE11/SPDL1/TRIP13/NLE1/TIPIN/GTSE1/RBL1/NDC80/ORC1/ZW10/CLSPN/CDC6/MSH2/FZR1/EZH2/ANAPC15/FBXO5/TTK/IK/MAD2L2/CENPF/ZWINT/MAD2L1BP/PCID2/CCNB1/RINT1/MDC1/NABP2/TICRR/DTL/FANCD2/DYNC1LI1/CHEK1/RAD17/EME1/BUB1B/DONSON/NAE1/TOPBP1/MAD2L1/RAD21/E2F7/BRD7/PLK1/CDT1/RFWD3/BUB1/CDK1/TRIAP1/MTBP/ZWILCH/GEN1/AURKB/CHEK2/BRCC3/BLM/PRKDC/PINX1	60
BP	GO:0071459	protein localization to chromosome, centromeric region	16/2099	25/18800	4.20385e-10	8.54783e-09	7.12206e-09	SPDL1/NDC80/ZW10/TTK/IK/CENPA/KNL1/BOD1/CDT1/CDK1/MTBP/ZWILCH/HASPIN/AURKB/RCC2/CHAMP1	16
BP	GO:0051170	import into nucleus	47/2099	163/18800	5.04045e-10	1.02069e-08	8.5044e-09	TNPO3/IPO5/ELAVL1/NUP133/TNPO1/IPO11/RBM22/NUP50/NUP188/HSP90AB1/NUP93/TNPO2/KPNB1/NUP88/ZPR1/NUP98/NUP107/TMCO6/NUP155/ECT2/SUMO1/IPO13/FAM53C/TARDBP/CSE1L/NUP153/NUP85/MED1/TRIM28/RAN/NXT1/HNRNPA1/NUP54/HIKESHI/HEATR3/NUP35/NOLC1/SNUPN/CDK1/HDAC3/PRKAG1/KPNA2/IPO9/IPO7/NUP62/PHB2/POM121C	47
BP	GO:0006406	mRNA export from nucleus	26/2099	62/18800	5.65645e-10	1.14076e-08	9.50477e-09	UPF1/NUP160/NSUN2/THOC3/NUP133/POLDIP3/THOC5/RAE1/NUP93/NUP88/SUPT6H/NUP107/SRSF3/NUP155/SMG7/GLE1/ENY2/HNRNPA2B1/DDX39A/NUP85/PCID2/NXT1/NCBP1/POLR2D/ALYREF/SMG5	26
BP	GO:0051053	negative regulation of DNA metabolic process	44/2099	148/18800	6.14038e-10	1.23332e-08	1.0276e-08	POLQ/XRCC1/TIPIN/XRCC5/RIF1/HNRNPC/CDC6/MSH2/DNAJC2/GTPBP4/TIMELESS/FBXO5/GMNN/SUB1/MSH6/MAD2L2/TENT4B/ZRANB3/AUNIP/GNL3L/TRIM28/MEN1/NAT10/HNRNPA1/SMARCAL1/BRCA2/PIF1/PARP1/TERF1/RPS3/CHEK1/RAD17/HNRNPU/DONSON/DFFA/UBQLN4/CDT1/OTUB1/EXOSC10/FANCB/HSF1/PARPBP/BLM/PINX1	44
BP	GO:0070200	establishment of protein localization to telomere	13/2099	17/18800	6.24383e-10	1.24902e-08	1.04068e-08	CCT4/TCP1/DKC1/CCT7/NABP2/BRCA2/WRAP53/CCT6A/TERF1/CCT5/CCT8/CCT3/CCT2	13
BP	GO:0006338	chromatin remodeling	65/2099	266/18800	6.71876e-10	1.3386e-08	1.11533e-08	BAZ1B/SMARCD1/PSME4/MCM2/ACTR6/SART3/HNRNPC/SUPT16H/SMARCB1/YY1/CHD8/TTI1/ACTR5/RBBP7/OIP5/CHRAC1/PIH1D1/ASF1B/GRWD1/NPM3/SMARCD2/SUPT6H/RNF8/MACROH2A1/HDAC1/UCHL5/SET/HELLS/CBX3/HJURP/YEATS4/SMARCA4/NASP/MORC2/ACTL6A/ANP32B/MYC/HMGA1/ANP32E/POLE3/SSRP1/MTA2/SUV39H2/MIS18A/CHAF1B/TAF6L/YEATS2/HMGB2/NUDT5/GATAD2A/CHAF1A/HCFC1/RUVBL1/NPM1/RUVBL2/KDM4D/NAP1L1/MCRS1/CENPP/H2AX/HDAC2/TOP1/CENPW/DAXX/D…	65
BP	GO:0051204	protein insertion into mitochondrial membrane	16/2099	26/18800	9.7931e-10	1.93108e-08	1.60898e-08	AGK/HSP90AA1/TIMM13/TOMM22/SAMM50/TIMM9/PDCD5/TIMM8A/TIMM10/NMT1/TIMM29/TIMM8B/TOMM70/MAIP1/HSPA4/TIMM22	16
BP	GO:0006479	protein methylation	53/2099	199/18800	9.8098e-10	1.93108e-08	1.60898e-08	KDM1A/PAF1/BRCA1/PHF20/RIF1/SMARCB1/SNRPD3/PRMT5/SNW1/SUV39H1/GSPT1/PIH1D1/DOT1L/FBL/EZH2/SUPT6H/NSD2/MACROH2A1/RBBP5/EEF2KMT/PCMT1/ETF1/SNRPB/PRMT1/DNMT1/MEN1/SMYD5/PWP1/KANSL2/CARM1/NTMT1/SUV39H2/RNF20/PAXIP1/DPY30/NSD1/FAM98B/COPRS/HCFC1/BEND3/SUZ12/KMT5A/PRMT3/KDM4D/MCRS1/WDR5/ZNF335/CTR9/PRMT6/NELFE/EHMT2/CSKMT/EEF1AKMT4	53
BP	GO:0008213	protein alkylation	53/2099	199/18800	9.8098e-10	1.93108e-08	1.60898e-08	KDM1A/PAF1/BRCA1/PHF20/RIF1/SMARCB1/SNRPD3/PRMT5/SNW1/SUV39H1/GSPT1/PIH1D1/DOT1L/FBL/EZH2/SUPT6H/NSD2/MACROH2A1/RBBP5/EEF2KMT/PCMT1/ETF1/SNRPB/PRMT1/DNMT1/MEN1/SMYD5/PWP1/KANSL2/CARM1/NTMT1/SUV39H2/RNF20/PAXIP1/DPY30/NSD1/FAM98B/COPRS/HCFC1/BEND3/SUZ12/KMT5A/PRMT3/KDM4D/MCRS1/WDR5/ZNF335/CTR9/PRMT6/NELFE/EHMT2/CSKMT/EEF1AKMT4	53
BP	GO:0070198	protein localization to chromosome, telomeric region	17/2099	30/18800	1.75283e-09	3.4368e-08	2.86354e-08	XRCC5/MACROH2A1/CCT4/TCP1/GNL3L/DKC1/CCT7/NABP2/BRCA2/WRAP53/CCT6A/TERF1/CCT5/CCT8/CCT3/CCT2/PINX1	17
BP	GO:0000154	rRNA modification	19/2099	37/18800	1.81135e-09	3.53751e-08	2.94745e-08	RPUSD1/BUD23/DIMT1/FBL/FTSJ3/GAR1/EMG1/METTL16/NSUN5/DKC1/NAT10/METTL5/NAF1/NHP2/RPUSD3/TFB2M/RPUSD4/RPUSD2/TRMT61B	19
BP	GO:0046390	ribose phosphate biosynthetic process	51/2099	191/18800	1.835e-09	3.56959e-08	2.97418e-08	AK2/SLC25A13/ELOVL5/COASY/ENO1/ACAT1/CAD/DLD/ACOT7/DHODH/GCDH/PDHX/ATP5F1B/UMPS/ATP5PB/PANK2/PAICS/PPAT/ACSS2/ACLY/PDHA1/MYC/ADCY3/ATIC/PRPSAP2/UCK2/PARP1/PRPS1/DLAT/ATP5F1A/ATP5MC3/ADK/SLC35B2/PANK4/GART/ATP5MC1/PRPSAP1/GMPS/TKT/VCP/STOML2/ATP5F1C/HPRT1/CTPS1/IMPDH2/PFAS/UCKL1/UQCC3/HACD2/NME1/ACACA	51
BP	GO:0046112	nucleobase biosynthetic process	13/2099	18/18800	2.01654e-09	3.90734e-08	3.2556e-08	CAD/DHODH/UMPS/PAICS/PPAT/PRPS1/GART/GMPS/HPRT1/CTPS1/SHMT1/SHMT2/MTOR	13
BP	GO:0006606	protein import into nucleus	45/2099	159/18800	2.2477e-09	4.33825e-08	3.61463e-08	TNPO3/IPO5/ELAVL1/NUP133/TNPO1/IPO11/RBM22/NUP50/NUP188/HSP90AB1/NUP93/TNPO2/KPNB1/NUP88/ZPR1/NUP98/NUP107/TMCO6/NUP155/ECT2/SUMO1/IPO13/FAM53C/TARDBP/CSE1L/NUP153/NUP85/MED1/TRIM28/RAN/NXT1/NUP54/HIKESHI/HEATR3/NUP35/NOLC1/SNUPN/CDK1/HDAC3/KPNA2/IPO9/IPO7/NUP62/PHB2/POM121C	45
BP	GO:1901293	nucleoside phosphate biosynthetic process	62/2099	257/18800	2.83758e-09	5.45545e-08	4.54548e-08	AK2/SLC25A13/ELOVL5/KARS1/COASY/ENO1/ACAT1/CAD/DLD/ACOT7/MTHFD1/DHODH/GCDH/GARS1/PDHX/ATP5F1B/UMPS/ATP5PB/PANK2/PAICS/PPAT/DUT/ACSS2/ACLY/PDHA1/MYC/ADCY3/ATIC/PRPSAP2/UCK2/PARP1/PRPS1/DLAT/ATP5F1A/ATP5MC3/ADK/SLC35B2/PANK4/GART/ATP5MC1/FLAD1/PRPSAP1/GMPS/VCP/STOML2/ATP5F1C/HPRT1/RRM1/TK1/DTYMK/CTPS1/RRM2/TYMS/SHMT1/IMPDH2/PFAS/UCKL1/PNP/UQCC3/HACD2/NME1/ACACA	62
BP	GO:0006303	double-strand break repair via nonhomologous end joining	26/2099	66/18800	2.85239e-09	5.46265e-08	4.55148e-08	MRE11/ERCC8/POLQ/XRCC1/XRCC5/RIF1/POLA1/NSD2/PRPF19/RNF8/PSMD14/MAD2L2/DCLRE1B/DEK/AUNIP/SMARCAL1/WRAP53/XRCC4/HMGB2/HMCES/HSF1/KDM4D/HMGB1/XRCC6/DCLRE1A/PRKDC	26
BP	GO:1904869	regulation of protein localization to Cajal body	10/2099	11/18800	2.91998e-09	5.54908e-08	4.6235e-08	CCT4/TCP1/DKC1/CCT7/CCT6A/MEPCE/CCT5/CCT8/CCT3/CCT2	10
BP	GO:1904871	positive regulation of protein localization to Cajal body	10/2099	11/18800	2.91998e-09	5.54908e-08	4.6235e-08	CCT4/TCP1/DKC1/CCT7/CCT6A/MEPCE/CCT5/CCT8/CCT3/CCT2	10
BP	GO:0045739	positive regulation of DNA repair	32/2099	94/18800	3.3446e-09	6.33167e-08	5.27555e-08	BRCA1/DDX11/TMEM161A/XRCC1/RIF1/FUS/MRGBP/FOXM1/RAD51AP1/TIMELESS/RNF8/MAD2L2/YEATS4/TRIM28/PCNA/SLF1/DHX9/ACTL6A/WRAP53/PARP1/RPS3/MMS19/UBE2V2/RUVBL1/UBE2N/FANCB/RUVBL2/BRCC3/KDM4D/H2AX/HMGB1/PRKDC	32
BP	GO:0034508	centromere complex assembly	17/2099	31/18800	3.47673e-09	6.55669e-08	5.46303e-08	CENPI/OIP5/CENPA/CENPF/HELLS/CENPK/HJURP/DLGAP5/NASP/CENPO/CENPE/CENPH/MIS18A/CENPN/CENPX/CENPP/CENPW	17
BP	GO:1903313	positive regulation of mRNA metabolic process	38/2099	124/18800	3.49494e-09	6.56597e-08	5.47077e-08	UPF1/PAF1/THRAP3/YBX1/DAZAP1/EXOSC5/CNOT3/KHSRP/SNW1/EXOSC3/HSPA8/PRPF19/NUP98/NCL/PRDX6/TARDBP/TENT4B/EXOSC9/AGO2/METTL16/EXOSC2/SYNCRIP/DHX9/TRA2B/NCBP1/PNPT1/HNRNPD/NT5C3B/POLR2D/RBMX/CELF1/YTHDF1/HNRNPU/LEO1/NUDT21/POLR2G/HSF1/CNOT7	38
BP	GO:0070897	transcription preinitiation complex assembly	20/2099	42/18800	3.72503e-09	6.97173e-08	5.80885e-08	TAF2/TAF11/SMARCB1/PSMC6/BRF2/PIH1D1/TAF6/UBTF/CAND1/TBP/TAF1B/SMARCA4/TAF4/POLR1E/GTF2A2/TAF5/TAF6L/TAF7/HMGB1/TAF9	20
BP	GO:0043628	ncRNA 3'-end processing	22/2099	50/18800	4.00198e-09	7.46181e-08	6.21718e-08	ELAC2/HSD17B10/EXOSC5/FBL/EXOSC3/ERI3/TENT4B/EXOSC9/EXOSC2/DKC1/TOE1/SSB/INTS14/INTS12/INTS7/POLR3K/INTS1/EXOSC10/RPS21/TRMT10C/EXOSC4/INTS5	22
BP	GO:0009165	nucleotide biosynthetic process	61/2099	255/18800	5.36608e-09	9.9676e-08	8.30501e-08	AK2/SLC25A13/ELOVL5/KARS1/COASY/ENO1/ACAT1/CAD/DLD/ACOT7/MTHFD1/DHODH/GCDH/GARS1/PDHX/ATP5F1B/UMPS/ATP5PB/PANK2/PAICS/PPAT/DUT/ACSS2/ACLY/PDHA1/MYC/ADCY3/ATIC/PRPSAP2/UCK2/PARP1/PRPS1/DLAT/ATP5F1A/ATP5MC3/ADK/SLC35B2/PANK4/GART/ATP5MC1/FLAD1/PRPSAP1/GMPS/VCP/STOML2/ATP5F1C/HPRT1/RRM1/DTYMK/CTPS1/RRM2/TYMS/SHMT1/IMPDH2/PFAS/UCKL1/PNP/UQCC3/HACD2/NME1/ACACA	61
BP	GO:0018205	peptidyl-lysine modification	83/2099	392/18800	5.57185e-09	1.03111e-07	8.59118e-08	KDM1A/NDUFAB1/MED24/BRCA1/PHF20/TAF2/JMJD6/SENP1/RIF1/ATXN7L3/SMARCB1/RANGAP1/DESI1/SNW1/MRGBP/SUV39H1/PIH1D1/DOT1L/PIAS4/TAF6/EZH2/SUPT6H/NSD2/MACROH2A1/SUMO1/PARK7/RBBP5/EEF2KMT/SET/ENY2/NAA50/GTF3C4/UBA2/YEATS4/HAT1/GNL3L/TAF4/TRIM28/DNMT1/MEN1/SMYD5/TAF5L/PWP1/ACTL6A/BRCA2/KANSL2/SAE1/POLE3/TAF5/KAT14/CHEK1/SUV39H2/NSMCE2/PAXIP1/SENP3/TAF6L/DPY30/YEATS2/NSD1/BRD7/HINT1/HCFC1/RUVBL1/BEND3/TAF7…	83
BP	GO:0043488	regulation of mRNA stability	44/2099	158/18800	5.8268e-09	1.07426e-07	8.95075e-08	UPF1/THRAP3/YBX1/ELAVL1/EXOSC5/CNOT3/KHSRP/FUS/HNRNPC/HNRNPM/ZC3H14/APEX1/E2F1/EXOSC3/FXR1/FASTKD2/TARDBP/TENT4B/EXOSC9/AGO2/FASTKD3/PCID2/METTL16/FXR2/EXOSC2/SYNCRIP/DHX9/TBRG4/PNPT1/FASTKD1/HNRNPD/NT5C3B/SERBP1/POLR2D/CELF1/YTHDF1/HNRNPU/LARP1/POLR2G/HNRNPA0/NPM1/RBM10/CNOT7/FASTKD5	44
BP	GO:0000380	alternative mRNA splicing, via spliceosome	28/2099	77/18800	5.93806e-09	1.0907e-07	9.08775e-08	KDM1A/PTBP1/STRAP/THRAP3/HNRNPM/PQBP1/HNRNPL/SRSF9/FXR1/SFPQ/KHDRBS1/SMU1/FXR2/HNRNPA1/DHX9/SRSF1/TRA2B/RBMX/CELF1/HNRNPU/SRSF2/RAVER1/MAGOH/RBM15/PUF60/RBM10/RNPS1/RBM8A	28
BP	GO:0010212	response to ionizing radiation	41/2099	142/18800	6.04928e-09	1.10702e-07	9.22368e-08	KDM1A/BRCA1/HSPA5/ERCC8/RAD51/KARS1/XRCC5/RAD54L/MSH2/EEF1D/BRAT1/RAD51AP1/RNF8/RAD1/ECT2/ELK1/FIGNL1/MEN1/MYC/NABP2/BRCA2/TICRR/INTS7/PARP1/FANCD2/TLK2/XRCC4/PAXIP1/TOPBP1/RFWD3/RHNO1/AEN/CHEK2/HSF1/BRCC3/KDM4D/H2AX/XRCC6/XRCC2/BLM/PRKDC	41
BP	GO:0051972	regulation of telomerase activity	21/2099	47/18800	6.42661e-09	1.17173e-07	9.76286e-08	XRCC5/HSP90AA1/MAPKAPK5/HSP90AB1/PTGES3/CCT4/NEK2/TCP1/HNRNPA2B1/DKC1/MEN1/MYC/HNRNPD/PIF1/WRAP53/NVL/NAF1/TERF1/CCT2/AURKB/PINX1	21
BP	GO:0006999	nuclear pore organization	11/2099	14/18800	8.65974e-09	1.56732e-07	1.30589e-07	NDC1/NUP133/SEH1L/NUP93/NUP98/NUP107/NUP153/NUP54/AHCTF1/NUP205/NUP35	11
BP	GO:1990173	protein localization to nucleoplasm	11/2099	14/18800	8.65974e-09	1.56732e-07	1.30589e-07	CCT4/TCP1/DKC1/CCT7/WRAP53/CCT6A/MEPCE/CCT5/CCT8/CCT3/CCT2	11
BP	GO:0050686	negative regulation of mRNA processing	16/2099	29/18800	9.0021e-09	1.62333e-07	1.35256e-07	PTBP1/U2AF2/ZC3H14/C1QBP/SRSF9/SRSF7/HNRNPA2B1/RBMX/RNF20/HNRNPK/RBM10/SRSF10/SUPT5H/CTR9/NELFE/RNPS1	16
BP	GO:0090502	RNA phosphodiester bond hydrolysis, endonucleolytic	29/2099	83/18800	9.18304e-09	1.64994e-07	1.37473e-07	ELAC2/NOP14/APEX1/POP1/POP4/CPSF3/RCL1/UTP20/AGO2/RPP40/KRI1/DBR1/NOB1/UTP23/RPP30/NOL9/BMS1/TSR1/FEN1/TSEN34/RPS21/POP7/EXO1/RRS1/EDC3/TBL3/NOP9/SND1/BOP1	29
BP	GO:0000184	nuclear-transcribed mRNA catabolic process, nonsense-mediated decay	19/2099	40/18800	9.65752e-09	1.72891e-07	1.44053e-07	UPF1/GSPT1/EIF3E/CASC3/MAGOHB/SMG7/ETF1/UPF3B/NCBP1/EIF4A3/NBAS/MAGOH/SMG8/EXOSC10/HNRNPAB/SMG5/SKIV2L/RNPS1/RBM8A	19
BP	GO:0015980	energy derivation by oxidation of organic compounds	71/2099	321/18800	1.08368e-08	1.93303e-07	1.6106e-07	NDUFAB1/SLC25A13/COX10/MDH1/NDUFS1/CS/MTFR1/NOA1/DLD/FH/MSH2/ACO2/PYGB/IDH3B/GYS1/AKT2/OGDH/CHCHD2/ATP5F1B/PTGES3/COX7A2L/PARK7/ATP5PB/SDHB/DLST/PANK2/TRAP1/PDHA1/MYBBP1A/CCNB1/NDUFB5/MYC/KHK/PNPT1/SDHC/MTFR2/MDH2/NIPSNAP2/NDUFB9/DLAT/ATP5F1A/PFKM/OXA1L/NDUFS2/SUCLG1/NDUFB6/VCP/STOML2/ATP5F1C/GHITM/NDUFV1/UQCRFS1/PRELID1/CDK1/SLC25A33/CYCS/TEFM/PPP1CA/UQCRH/SLC25A22/C2orf69/COX5A/CYC1/SHMT2/NDUFA…	71
BP	GO:0000076	DNA replication checkpoint signaling	12/2099	17/18800	1.31538e-08	2.33787e-07	1.94792e-07	TIPIN/ORC1/CLSPN/CDC45/CDC6/TIMELESS/DNA2/TICRR/RAD17/NAE1/TOPBP1/CDT1	12
BP	GO:0051383	kinetochore organization	14/2099	23/18800	1.37709e-08	2.43878e-07	2.03199e-07	NDC80/SMC4/CENPA/CENPF/CENPK/DLGAP5/SMC2/CENPE/NUF2/CENPH/CENPN/CDT1/CENPX/CENPW	14
BP	GO:0006383	transcription by RNA polymerase III	22/2099	53/18800	1.49441e-08	2.6371e-07	2.19723e-07	BAZ1B/POLR3H/CHD8/BRF2/TBP/POLR3G/GTF3C2/GTF3C3/DEK/GTF3C4/MYBBP1A/POLR3F/RPTOR/ZC3H8/GTF3C5/POLR3K/DDX21/POLR3D/MAF1/POLR3C/MTOR/CRCP	22
BP	GO:0000727	double-strand break repair via break-induced replication	10/2099	12/18800	1.57507e-08	2.76955e-07	2.30759e-07	MCM2/MCM6/CDC45/CDC7/MCM5/MCM4/MCM3/GINS2/GINS4/MCM7	10
BP	GO:0031297	replication fork processing	19/2099	41/18800	1.61155e-08	2.82365e-07	2.35266e-07	DDX11/MRE11/RAD51/EXD2/ZRANB3/PCNA/DNA2/SMARCAL1/BRCA2/MMS22L/EME1/TONSL/RFWD3/CENPX/GEN1/ALYREF/TRAIP/FANCM/BLM	19
BP	GO:0061982	meiosis I cell cycle process	39/2099	136/18800	1.73565e-08	3.03033e-07	2.52488e-07	MRE11/RAD51/NDC1/TRIP13/NDC80/RAD54L/AURKA/CCNB1IP1/CDC25B/CCNE1/RAD51C/RAD51AP1/FBXO5/MSH6/CKS2/SGO1/PSMC3IP/TOP2A/ESPL1/BRIP1/BRCA2/FANCD2/TERF1/EME1/CCNB2/CDC25C/SGO2/CDC25A/PTTG1/RAD21/PLK1/ING2/CENPX/CCNE2/RAD51D/PSMD13/FANCM/EHMT2/BAG6	39
BP	GO:0016571	histone methylation	43/2099	158/18800	1.82432e-08	3.17394e-07	2.64453e-07	KDM1A/PAF1/BRCA1/PHF20/RIF1/SMARCB1/PRMT5/SNW1/SUV39H1/PIH1D1/DOT1L/FBL/EZH2/SUPT6H/NSD2/MACROH2A1/RBBP5/PRMT1/DNMT1/MEN1/SMYD5/PWP1/KANSL2/CARM1/NTMT1/SUV39H2/RNF20/PAXIP1/DPY30/NSD1/COPRS/HCFC1/BEND3/SUZ12/KMT5A/KDM4D/MCRS1/WDR5/ZNF335/CTR9/PRMT6/NELFE/EHMT2	43
BP	GO:0006301	postreplication repair	17/2099	34/18800	2.19969e-08	3.81356e-07	3.17746e-07	POLDIP2/SPRTN/BRCA1/POLD1/RAD18/POLD3/MSH2/POLE2/USP10/POLD2/MAD2L2/PCNA/DTL/VCP/PCLAF/UBE2V2/UBE2N	17
BP	GO:0045132	meiotic chromosome segregation	31/2099	96/18800	2.42904e-08	4.19647e-07	3.4965e-07	MRE11/NCAPH2/NDC1/TRIP13/CCNB1IP1/CCNE1/RAD51C/TTK/SMC4/NCAPH/SGO1/PSMC3IP/TOP2A/ESPL1/BRIP1/SMC2/NUF2/FANCD2/TERF1/EME1/BUB1B/SGO2/PTTG1/RAD21/PLK1/BUB1/CENPX/CCNE2/FANCM/EHMT2/BAG6	31
BP	GO:0070131	positive regulation of mitochondrial translation	11/2099	15/18800	2.91735e-08	5.00507e-07	4.17023e-07	CDK5RAP1/C1QBP/MRPS27/FASTKD2/FASTKD3/RPUSD3/RPUSD4/TRUB2/TRMT10C/MPV17L2/RCC1L	11
BP	GO:1901836	regulation of transcription of nucleolar large rRNA by RNA polymerase I	11/2099	15/18800	2.91735e-08	5.00507e-07	4.17023e-07	DDX11/SMARCB1/PIH1D1/MACROH2A1/NCL/IPPK/SMARCA4/NOL11/PWP1/MARS1/MTOR	11
BP	GO:0046034	ATP metabolic process	62/2099	273/18800	3.27145e-08	5.59316e-07	4.66022e-07	AK2/NDUFAB1/SLC25A13/NDUFS1/ENO1/DLD/MSH2/PGK1/GPI/OGDH/CHCHD2/GIT1/HSPA8/ATP5F1B/GAPDH/TPI1/COX7A2L/PARK7/ATP5PB/FIGNL1/CCNB1/LDHA/NDUFB5/MYC/OLA1/FOXK2/SDHC/PARP1/NIPSNAP2/NDUFB9/ATP5F1A/PFKM/ATP5MC3/NDUFS2/ATP5MC1/NDUFB6/VCP/STOML2/NUDT5/ATP5F1C/GHITM/NDUFV1/UQCRFS1/CDK1/PGAM1/SLC25A33/CYCS/TEFM/UQCRH/C2orf69/BEND3/COX5A/CYC1/PRKAG1/SHMT2/NDUFA12/NDUFA6/NDUFA4/UQCC3/NDUFS3/PARG/EIF6	62
BP	GO:0006605	protein targeting	69/2099	317/18800	3.41812e-08	5.82377e-07	4.85237e-07	M6PR/AGK/MIPEP/HSPA5/USP36/AP3D1/TIMM21/HSP90AA1/HUWE1/TIMM13/TOMM22/MIEF1/SAMM50/TIMM9/SRP54/CHMP4B/UBL4A/SGTA/TIMM44/PDCD5/TIMM50/AKT2/PMPCB/YWHAE/GRPEL1/HSPA8/SSR3/HTRA2/MFN2/TIMM8A/TOMM40/SEC61G/AP3B1/YWHAQ/TIMM17A/TIMM10/ZDHHC4/NUP54/PEX5/KATNB1/SAE1/TIMM29/HAX1/HSPD1/ATG3/SRPRB/GOLGA7/PARD3/TIMM8B/TOMM70/AIFM1/PEX10/CHCHD4/GRPEL2/YWHAZ/PMPCA/YWHAB/YIF1B/SRP68/YWHAG/HSPA4/TOMM20/SRP72/CDK5R1…	69
BP	GO:0009260	ribonucleotide biosynthetic process	47/2099	184/18800	3.53589e-08	5.9949e-07	4.99495e-07	AK2/SLC25A13/ELOVL5/COASY/ENO1/ACAT1/CAD/DLD/ACOT7/DHODH/GCDH/PDHX/ATP5F1B/UMPS/ATP5PB/PANK2/PAICS/PPAT/ACSS2/ACLY/PDHA1/MYC/ADCY3/ATIC/UCK2/PARP1/DLAT/ATP5F1A/ATP5MC3/ADK/SLC35B2/PANK4/GART/ATP5MC1/GMPS/VCP/STOML2/ATP5F1C/HPRT1/CTPS1/IMPDH2/PFAS/UCKL1/UQCC3/HACD2/NME1/ACACA	47
BP	GO:0001522	pseudouridine synthesis	12/2099	18/18800	3.54283e-08	5.9949e-07	4.99495e-07	RPUSD1/PUS7/GAR1/PUS3/DKC1/NAF1/NHP2/RPUSD3/RPUSD4/RPUSD2/TRUB2/PUS1	12
BP	GO:2001022	positive regulation of response to DNA damage stimulus	37/2099	129/18800	3.97771e-08	6.7078e-07	5.58894e-07	BRCA1/DDX11/TMEM161A/XRCC1/RIF1/FUS/MRGBP/PIAS4/FOXM1/RAD51AP1/TIMELESS/RNF8/FXR1/MAD2L2/YEATS4/FXR2/TRIM28/PCNA/SLF1/DHX9/ACTL6A/MYC/WRAP53/PARP1/RPS3/MMS19/PAXIP1/UBE2V2/RUVBL1/UBE2N/FANCB/RUVBL2/BRCC3/KDM4D/H2AX/HMGB1/PRKDC	37
BP	GO:0070646	protein modification by small protein removal	45/2099	174/18800	4.60798e-08	7.74422e-07	6.45249e-07	USP36/USP13/TAF2/SART3/ITCH/SENP1/ATXN7L3/DESI1/USP14/USP10/TAF6/USP42/USP5/PSMD14/PARK7/UCHL5/ENY2/COPS5/STAMBP/TAF4/TAF5L/COPS4/COPS3/COPS7B/TAF5/OTUD6B/SPATA2/SENP3/TAF6L/USP1/VCP/OTUB1/COPS6/USP39/HINT1/GPS1/SF3B5/CDK1/ASXL1/EIF3F/TAF7/SHMT2/BRCC3/SF3B3/TAF9	45
BP	GO:0106074	aminoacyl-tRNA metabolism involved in translational fidelity	10/2099	13/18800	6.13672e-08	1.02093e-06	8.50637e-07	LARS2/IARS2/AARS1/AARS2/DTD1/DTD2/LARS1/TARS2/IARS1/VARS1	10
BP	GO:1900262	regulation of DNA-directed DNA polymerase activity	10/2099	13/18800	6.13672e-08	1.02093e-06	8.50637e-07	RFC2/GINS1/RFC5/GINS2/PCNA/RFC3/DSCC1/GINS4/RFC4/GINS3	10
BP	GO:1900264	positive regulation of DNA-directed DNA polymerase activity	10/2099	13/18800	6.13672e-08	1.02093e-06	8.50637e-07	RFC2/GINS1/RFC5/GINS2/PCNA/RFC3/DSCC1/GINS4/RFC4/GINS3	10
BP	GO:2000779	regulation of double-strand break repair	33/2099	110/18800	6.51932e-08	1.08094e-06	9.00638e-07	KDM1A/DDX11/RAD51/POLQ/RIF1/FUS/MRGBP/NSD2/FOXM1/RAD51AP1/TIMELESS/MAD2L2/DEK/YEATS4/AUNIP/FIGNL1/SLF1/ACTL6A/WRAP53/PARP1/CHEK1/MMS19/UBQLN4/OTUB1/UBE2V2/RUVBL1/UBE2N/FANCB/RUVBL2/HSF1/PARPBP/KDM4D/PRKDC	33
BP	GO:0009124	nucleoside monophosphate biosynthetic process	19/2099	44/18800	6.66325e-08	1.10111e-06	9.17443e-07	CAD/DHODH/UMPS/PAICS/PPAT/DUT/ATIC/UCK2/PRPS1/ADK/GART/GMPS/HPRT1/TK1/TYMS/SHMT1/IMPDH2/PFAS/UCKL1	19
BP	GO:0044774	mitotic DNA integrity checkpoint signaling	28/2099	85/18800	7.06776e-08	1.16406e-06	9.69895e-07	BRCA1/MRE11/TIPIN/GTSE1/ORC1/CLSPN/CDC6/MSH2/FZR1/RINT1/MDC1/TICRR/DTL/FANCD2/CHEK1/RAD17/EME1/DONSON/NAE1/TOPBP1/PLK1/RFWD3/CDK1/TRIAP1/CHEK2/BRCC3/BLM/PRKDC	28
BP	GO:0006354	DNA-templated transcription, elongation	27/2099	81/18800	9.12799e-08	1.49839e-06	1.24845e-06	PAF1/ELOA/SUPT16H/THOC5/NELFCD/HTATSF1/AXIN1/ERCC2/EZH2/SUPT6H/RNF8/ENY2/GTF2F1/PCID2/ADRM1/POLR1E/HNRNPU/ERCC3/WDR43/LEO1/CDK12/TEFM/ALYREF/SUPT5H/CTR9/NELFE/HMGN1	27
BP	GO:0060260	regulation of transcription initiation from RNA polymerase II promoter	20/2099	49/18800	9.44816e-08	1.54581e-06	1.28797e-06	MED24/TAF2/TAF11/PSMC6/TAF6/CAND1/TBP/SUB1/MED1/TAF4/CDK4/GTF2A2/TAF4B/TAF5/PAXIP1/MED30/TAF7/MED14/HMGB1/TAF9	20
BP	GO:0051656	establishment of organelle localization	81/2099	404/18800	1.04479e-07	1.70374e-06	1.41955e-06	PAFAH1B1/SPDL1/LSG1/C12orf4/RIOK2/AP3D1/NDE1/SPAG5/KIF22/NDC80/XPO1/SEH1L/ZW10/NUDC/CDC23/KIF3B/CHMP4B/FAM83D/YKT6/KPNB1/NUP88/C17orf75/PDCD10/TTL/CENPA/STK25/CENPF/KIF14/COPS5/KIF18A/GPSM2/MKKS/DLGAP5/LLGL1/RAN/AP3B1/CCNB1/PSRC1/CDCA8/ESPL1/LTV1/PREB/LRPPRC/BBS7/CENPE/KATNB1/KIF2C/NUF2/BOD1/CDCA5/TERF1/PARD3/ARFGAP2/INCENP/HNRNPU/ATP13A2/MAD2L1/ABCE1/YWHAZ/BORCS5/PLK1/CDT1/MAP4K2/DCTN2/FAM91A1/A…	81
BP	GO:0072522	purine-containing compound biosynthetic process	49/2099	202/18800	1.05278e-07	1.71112e-06	1.4257e-06	AK2/SLC25A13/ELOVL5/COASY/ENO1/ACAT1/DLD/ACOT7/MTHFD1/GCDH/PDHX/ATP5F1B/ATP5PB/AMD1/PANK2/PAICS/PPAT/ACSS2/ACLY/PDHA1/MYC/ADCY3/ATIC/PRPSAP2/PARP1/PRPS1/DLAT/ATP5F1A/ATP5MC3/ADK/SLC35B2/PANK4/GART/ATP5MC1/PRPSAP1/GMPS/VCP/STOML2/ATP5F1C/HPRT1/SHMT1/IMPDH2/PFAS/SHMT2/PNP/UQCC3/HACD2/NME1/ACACA	49
BP	GO:0006119	oxidative phosphorylation	38/2099	139/18800	1.05952e-07	1.71642e-06	1.43012e-06	NDUFAB1/NDUFS1/DLD/MSH2/CHCHD2/ATP5F1B/COX7A2L/PARK7/ATP5PB/CCNB1/NDUFB5/MYC/SDHC/NIPSNAP2/NDUFB9/ATP5F1A/NDUFS2/NDUFB6/VCP/STOML2/ATP5F1C/GHITM/NDUFV1/UQCRFS1/CDK1/SLC25A33/CYCS/TEFM/UQCRH/C2orf69/COX5A/CYC1/SHMT2/NDUFA12/NDUFA6/NDUFA4/UQCC3/NDUFS3	38
BP	GO:0000731	DNA synthesis involved in DNA repair	17/2099	37/18800	1.07835e-07	1.74122e-06	1.45078e-06	POLDIP2/SPRTN/POLD1/POLD3/POLE2/POLA1/USP10/POLD2/MAD2L2/WRNIP1/HROB/PCNA/RFC3/DTL/VCP/PCLAF/POLE	17
BP	GO:0060261	positive regulation of transcription initiation from RNA polymerase II promoter	18/2099	41/18800	1.08384e-07	1.74438e-06	1.45342e-06	MED24/TAF2/TAF11/PSMC6/TAF6/CAND1/TBP/SUB1/MED1/TAF4/GTF2A2/TAF4B/TAF5/PAXIP1/MED30/TAF7/MED14/TAF9	18
BP	GO:0070192	chromosome organization involved in meiotic cell cycle	25/2099	72/18800	1.09888e-07	1.76285e-06	1.46881e-06	NCAPD2/MRE11/NCAPH2/RAD51/NDC1/TRIP13/CCNB1IP1/CCNE1/RAD51C/SMC4/NCAPH/SGO1/PSMC3IP/BRIP1/SMC2/FANCD2/TERF1/NCAPD3/BUB1B/SGO2/RAD21/BUB1/CCNE2/EHMT2/BAG6	25
BP	GO:0006753	nucleoside phosphate metabolic process	94/2099	495/18800	1.49913e-07	2.39715e-06	1.99731e-06	AK2/SLC25A13/ELOVL5/NTHL1/GNAI3/KARS1/COASY/ENO1/ACAT1/UNG/CAD/DLD/ACOT7/MTHFD1/ACOT8/PGK1/DHODH/GPI/GCDH/OGDH/GARS1/GIT1/PDHX/ATP5F1B/GAPDH/TPI1/HMGCR/UMPS/PARK7/ATP5PB/DLST/PANK2/ITPA/PAICS/PPAT/DUT/MBD4/ACSS2/ACLY/PDHA1/RAN/LDHA/NUDT15/MYC/ADCY3/ATIC/TDG/PRPSAP2/FOXK2/NT5C3B/UCK2/PARP1/PRPS1/DLAT/ATP5F1A/PFKM/ATP5MC3/ADK/SLC35B2/PANK4/GART/ATP5MC1/FLAD1/PRPSAP1/NAXE/GMPS/VCP/STOML2/NUDT5/ATP5F…	94
BP	GO:0000966	RNA 5'-end processing	13/2099	23/18800	1.56632e-07	2.4965e-06	2.08009e-06	HSD17B10/NOP14/POP1/POP4/UTP20/RPP40/PNPT1/SSB/RPP30/POP7/TRMT10C/TBL3/NOP9	13
BP	GO:1902369	negative regulation of RNA catabolic process	26/2099	78/18800	1.57267e-07	2.49858e-06	2.08182e-06	NSUN2/THRAP3/YBX1/ELAVL1/FUS/HNRNPC/E2F1/SLIRP/TARDBP/TENT4B/ZCCHC17/METTL16/DKC1/SYNCRIP/DHX9/LRPPRC/HNRNPD/NAF1/NBAS/HNRNPU/LARP1/PHAX/HNRNPA0/RBM10/PKP3/HNRNPAB	26
BP	GO:0007127	meiosis I	36/2099	130/18800	1.60013e-07	2.53405e-06	2.11137e-06	MRE11/RAD51/NDC1/TRIP13/NDC80/RAD54L/AURKA/CCNB1IP1/CDC25B/CCNE1/RAD51C/RAD51AP1/FBXO5/CKS2/SGO1/PSMC3IP/TOP2A/ESPL1/BRIP1/BRCA2/FANCD2/TERF1/EME1/CCNB2/SGO2/PTTG1/RAD21/PLK1/ING2/CENPX/CCNE2/RAD51D/PSMD13/FANCM/EHMT2/BAG6	36
BP	GO:0006520	cellular amino acid metabolic process	62/2099	285/18800	1.70646e-07	2.69381e-06	2.24448e-06	SLC25A13/LARS2/SARS1/ALDH18A1/KARS1/IARS2/HSD17B10/ACAT1/CAD/SEPHS1/AARS1/DLD/MTHFD1/GSS/SMS/EARS2/PYCR3/GCDH/GARS1/BLMH/CARS1/TARS1/RARS1/NIT2/ODC1/FARSB/PARK7/DARS2/DLST/GOT1/AARS2/PPAT/QRSL1/LRRC47/LARS1/NARS1/YARS1/PSAT1/EPRS1/NARS2/ASNSD1/YARS2/TARS2/ENOPH1/FARS2/PSPH/AZIN1/GART/PARS2/GMPS/MARS1/HARS1/CTPS1/SHMT1/PFAS/FARSA/SHMT2/IARS1/VARS1/DHFR/MARS2/GATC	62
BP	GO:1902750	negative regulation of cell cycle G2/M phase transition	23/2099	64/18800	1.71359e-07	2.69644e-06	2.24668e-06	BRCA1/MRE11/ORC1/CLSPN/CDC6/FZR1/MACROH2A1/RINT1/NABP2/TICRR/DTL/CHEK1/RAD17/DONSON/NAE1/TOPBP1/RAD21/PLK1/CDK1/AURKB/BRCC3/BLM/PINX1	23
BP	GO:0010639	negative regulation of organelle organization	73/2099	356/18800	1.76422e-07	2.7673e-06	2.30572e-06	FKBP4/SLC25A5/BAZ1B/ZNF207/BRCA1/MNAT1/SPDL1/PHF23/MPHOSPH9/GDI2/TRIP13/XRCC1/MCM2/NDC80/HUWE1/ZW10/TPX2/HNRNPC/MAPRE1/CHMP4B/PSMD10/ANAPC15/FBXO5/TTK/IK/RAD1/MAD2L2/CENPF/TENT4B/ZWINT/MAD2L1BP/MKKS/PCID2/GNL3L/TOP2A/CCNB1/NAT10/ESPL1/HNRNPA1/CKAP2/PIF1/KATNB1/PARP1/DYNC1LI1/TBC1D7/TERF1/CHEK1/HNRNPU/CYRIB/BUB1B/CCNF/MAD2L1/PTTG1/RAD21/GHITM/PLK1/CDT1/PRELID1/BUB1/TRIAP1/EXOSC10/MTBP/ZWILCH/SMCR8…	73
BP	GO:0006839	mitochondrial transport	45/2099	182/18800	1.91008e-07	2.98662e-06	2.48845e-06	SLC25A13/SLC25A5/AGK/MIPEP/USP36/TIMM21/HSP90AA1/HUWE1/TIMM13/TOMM22/SAMM50/TIMM9/TIMM44/PDCD5/TIMM50/PMPCB/GRPEL1/HTRA2/MFN2/TIMM8A/TOMM40/TIMM17A/TIMM10/ABCB10/NMT1/SAE1/TIMM29/HAX1/HSPD1/TIMM8B/TOMM70/OXA1L/AIFM1/MAIP1/CHCHD4/GRPEL2/VDAC2/PMPCA/HSPA4/NAIF1/TOMM20/TIMM22/UBE2L3/FZD9/TIMM23	45
BP	GO:0061077	chaperone-mediated protein folding	24/2099	70/18800	2.5766e-07	4.01609e-06	3.3462e-06	FKBP4/HSPA5/ST13/DNAJC5/CSNK2A1/PDCD5/HSPA8/PTGES3/HSPA9/CCT4/PDCL3/TCP1/TRAP1/CCT7/UNC45A/CCT6A/CCT5/CCT8/DFFA/CCT3/CCT2/DNAJC7/PPID/HSPA14	24
BP	GO:0009117	nucleotide metabolic process	92/2099	487/18800	2.592e-07	4.02737e-06	3.35561e-06	AK2/SLC25A13/ELOVL5/NTHL1/GNAI3/KARS1/COASY/ENO1/ACAT1/UNG/CAD/DLD/ACOT7/MTHFD1/ACOT8/PGK1/DHODH/GPI/GCDH/OGDH/GARS1/GIT1/PDHX/ATP5F1B/GAPDH/TPI1/HMGCR/UMPS/PARK7/ATP5PB/DLST/PANK2/ITPA/PAICS/PPAT/DUT/MBD4/ACSS2/ACLY/PDHA1/RAN/LDHA/NUDT15/MYC/ADCY3/ATIC/TDG/PRPSAP2/FOXK2/NT5C3B/UCK2/PARP1/PRPS1/DLAT/ATP5F1A/PFKM/ATP5MC3/ADK/SLC35B2/PANK4/GART/ATP5MC1/FLAD1/PRPSAP1/NAXE/GMPS/VCP/STOML2/NUDT5/ATP5F…	92
BP	GO:1902751	positive regulation of cell cycle G2/M phase transition	15/2099	31/18800	2.60539e-07	4.0355e-06	3.36238e-06	CDC7/CDC25B/RAD51C/FBXO5/CCNB1/CDK4/DTL/CDC25C/DBF4B/CDC25A/RRM1/CDK1/ATAD5/RCC2/NPM1	15
BP	GO:0051569	regulation of histone H3-K4 methylation	17/2099	39/18800	2.77751e-07	4.28864e-06	3.5733e-06	KDM1A/BRCA1/PHF20/SNW1/PIH1D1/MACROH2A1/DNMT1/KANSL2/PAXIP1/HCFC1/MCRS1/WDR5/ZNF335/CTR9/PRMT6/NELFE/EHMT2	17
BP	GO:0044818	mitotic G2/M transition checkpoint	19/2099	48/18800	3.51188e-07	5.40568e-06	4.50401e-06	BRCA1/MRE11/ORC1/CLSPN/CDC6/FZR1/RINT1/NABP2/TICRR/DTL/CHEK1/RAD17/DONSON/NAE1/TOPBP1/PLK1/CDK1/BRCC3/BLM	19
BP	GO:0031440	regulation of mRNA 3'-end processing	14/2099	28/18800	3.92542e-07	6.00491e-06	5.00329e-06	PAF1/SNRPA/ZC3H14/CPSF6/NCBP1/CPSF7/RNF20/VIRMA/LEO1/NUDT21/HSF1/SUPT5H/CTR9/NELFE	14
BP	GO:1903322	positive regulation of protein modification by small protein conjugation or removal	37/2099	140/18800	3.92549e-07	6.00491e-06	5.00329e-06	KDM1A/SPRTN/BRCA1/PHF23/HSPA5/SART3/HUWE1/TRIB3/PSMD10/AXIN1/PIAS4/FZR1/AIMP2/UBE2S/CDC20/MASTL/UBA2/HSPBP1/UBQLN1/DERL1/DCUN1D5/FANCI/SAE1/TBC1D7/RNF20/PAXIP1/VCP/PLK1/UBE2V2/CENPX/HDAC3/UBE2C/UBE2N/AMER1/UBE2L3/FANCM/CTR9	37
BP	GO:0034471	ncRNA 5'-end processing	12/2099	21/18800	4.06126e-07	6.17437e-06	5.14449e-06	HSD17B10/NOP14/POP1/POP4/UTP20/RPP40/SSB/RPP30/POP7/TRMT10C/TBL3/NOP9	12
BP	GO:0140747	regulation of ncRNA transcription	12/2099	21/18800	4.06126e-07	6.17437e-06	5.14449e-06	DDX11/SMARCB1/PIH1D1/MACROH2A1/NCL/IPPK/SMARCA4/NOL11/PWP1/MEPCE/MARS1/MTOR	12
BP	GO:0010972	negative regulation of G2/M transition of mitotic cell cycle	22/2099	62/18800	4.0851e-07	6.19156e-06	5.15881e-06	BRCA1/MRE11/ORC1/CLSPN/CDC6/FZR1/RINT1/NABP2/TICRR/DTL/CHEK1/RAD17/DONSON/NAE1/TOPBP1/RAD21/PLK1/CDK1/AURKB/BRCC3/BLM/PINX1	22
BP	GO:0036297	interstrand cross-link repair	15/2099	32/18800	4.39787e-07	6.62496e-06	5.51992e-06	RAD51/NEIL3/RAD51AP1/RNF8/DCLRE1B/HROB/MCM8/FAAP24/FANCD2/VCP/RFWD3/CENPX/RAD51D/FANCM/DCLRE1A	15
BP	GO:0050685	positive regulation of mRNA processing	15/2099	32/18800	4.39787e-07	6.62496e-06	5.51992e-06	PAF1/THRAP3/DAZAP1/SNW1/HSPA8/PRPF19/NUP98/NCL/PRDX6/TRA2B/NCBP1/RBMX/LEO1/NUDT21/HSF1	15
BP	GO:1900363	regulation of mRNA polyadenylation	11/2099	18/18800	4.93399e-07	7.40999e-06	6.17401e-06	SNRPA/ZC3H14/CPSF6/CPSF7/RNF20/VIRMA/NUDT21/HSF1/SUPT5H/CTR9/NELFE	11
BP	GO:0006091	generation of precursor metabolites and energy	92/2099	494/18800	5.00863e-07	7.49928e-06	6.2484e-06	NDUFAB1/SLC25A13/CIAPIN1/COX10/MDH1/NDUFS1/CS/MTFR1/FECH/ENO1/ACAT1/AACS/SLC27A5/NOA1/DLD/FH/MSH2/ACO2/PYGB/IDH3B/PGK1/GYS1/GPI/AKT2/OGDH/CHCHD2/GIT1/ATP5F1B/PTGES3/GAPDH/TPI1/COX7A2L/PARK7/ATP5PB/SDHB/DLST/PANK2/TRAP1/ACSS2/PDHA1/MYBBP1A/CCNB1/LDHA/TACO1/NDUFB5/MYC/KHK/PNPT1/FOXK2/SDHC/MTFR2/MDH2/NIPSNAP2/NDUFB9/DLAT/ATP5F1A/PFKM/OXA1L/NDUFS2/SUCLG1/TKT/NDUFB6/VCP/STOML2/ATP5F1C/GHITM/COX11/NDUF…	92
BP	GO:0051299	centrosome separation	10/2099	15/18800	5.21061e-07	7.73142e-06	6.44182e-06	NDE1/AURKA/RANBP1/KIF3B/NEK2/CEP85/KIF11/CHEK1/CNTROB/NUP62	10
BP	GO:0051315	attachment of mitotic spindle microtubules to kinetochore	10/2099	15/18800	5.21061e-07	7.73142e-06	6.44182e-06	NDC80/SEH1L/CENPE/KIF2C/NUF2/BOD1/HNRNPU/CDT1/AURKB/CHAMP1	10
BP	GO:2000104	negative regulation of DNA-templated DNA replication	10/2099	15/18800	5.21061e-07	7.73142e-06	6.44182e-06	TIPIN/TIMELESS/FBXO5/GMNN/ZRANB3/SMARCAL1/BRCA2/DONSON/CDT1/BLM	10
BP	GO:0000018	regulation of DNA recombination	35/2099	131/18800	6.05485e-07	8.95718e-06	7.46313e-06	KDM1A/MRE11/RAD51/POLQ/RIF1/FUS/MSH2/MRGBP/ERCC2/EXOSC3/SUPT6H/NSD2/RAD51AP1/TIMELESS/MSH6/MAD2L2/ZRANB3/YEATS4/FIGNL1/ACTL6A/WRAP53/PARP1/CHEK1/MMS19/PAXIP1/UBQLN4/RUVBL1/ATAD5/FANCB/KPNA2/RUVBL2/HMCES/ALYREF/PARPBP/BLM	35
BP	GO:0018022	peptidyl-lysine methylation	37/2099	143/18800	6.93185e-07	1.0224e-05	8.51861e-06	KDM1A/BRCA1/PHF20/RIF1/SMARCB1/SNW1/SUV39H1/PIH1D1/DOT1L/EZH2/SUPT6H/NSD2/MACROH2A1/RBBP5/EEF2KMT/DNMT1/MEN1/SMYD5/PWP1/KANSL2/SUV39H2/PAXIP1/DPY30/NSD1/HCFC1/BEND3/KMT5A/KDM4D/MCRS1/WDR5/ZNF335/CTR9/PRMT6/NELFE/EHMT2/CSKMT/EEF1AKMT4	37
BP	GO:1904358	positive regulation of telomere maintenance via telomere lengthening	16/2099	37/18800	7.11458e-07	1.04622e-05	8.71715e-06	XRCC5/MAPKAPK5/CCT4/NEK2/TCP1/HNRNPA2B1/DKC1/HNRNPA1/CCT7/NAF1/CCT6A/CCT5/CCT8/CCT3/CCT2/AURKB	16
BP	GO:0009112	nucleobase metabolic process	15/2099	33/18800	7.23065e-07	1.06014e-05	8.83307e-06	KDM1A/CAD/DHODH/UMPS/PAICS/PPAT/PRPS1/GART/GMPS/HPRT1/CTPS1/TYMS/SHMT1/SHMT2/MTOR	15
BP	GO:1900180	regulation of protein localization to nucleus	35/2099	132/18800	7.36516e-07	1.07666e-05	8.97077e-06	IPO5/POLR1A/RBM22/HSP90AB1/ZPR1/BYSL/ECT2/CCT4/SUMO1/PARK7/TCP1/TARDBP/TRIM28/DKC1/RAN/CCT7/NUP54/NVL/PARP1/CCT6A/MEPCE/MFHAS1/CCT5/CCT8/ATP13A2/CCT3/NOLC1/CCT2/PLK1/CDK1/HDAC3/SUMO3/NF2/MCRS1/PINX1	35
BP	GO:0031330	negative regulation of cellular catabolic process	57/2099	265/18800	7.80011e-07	1.13688e-05	9.47251e-06	POLDIP2/NSUN2/PHF23/THRAP3/USP36/YBX1/ELAVL1/FUS/HNRNPC/HSP90AB1/CSNK2A1/E2F1/CHMP4B/USP14/SGTA/RGP1/EIF4G1/PDCL3/PARK7/UCHL5/SLIRP/TARDBP/TENT4B/ZCCHC17/RPL5/PSMF1/METTL16/DKC1/SYNCRIP/DHX9/LRPPRC/HNRNPD/FOXK2/NAF1/TLK2/EIF3H/NBAS/HNRNPU/LARP1/ATP13A2/DFFA/UBQLN4/CAMLG/PHAX/BAG5/PBK/RPS7/SMCR8/HNRNPA0/RBM10/PKP3/HNRNPAB/DDRGK1/MTOR/EHMT2/BAG6/TAF9	57
BP	GO:0000245	spliceosomal complex assembly	25/2099	79/18800	8.25315e-07	1.19586e-05	9.9639e-06	DDX1/GEMIN2/SRPK1/SF3A1/PRPF6/CRNKL1/PRPF19/SRSF9/SNRPC/SNRPD2/SRSF1/NCBP1/TXNL4A/SNRPG/SNRNP200/CELF1/GEMIN6/SNRPD1/SF1/USP39/DDX23/PUF60/SNRPE/SF3A3/SRSF10	25
BP	GO:0031060	regulation of histone methylation	25/2099	79/18800	8.25315e-07	1.19586e-05	9.9639e-06	KDM1A/PAF1/BRCA1/PHF20/RIF1/SMARCB1/SNW1/SUV39H1/PIH1D1/SUPT6H/MACROH2A1/DNMT1/KANSL2/RNF20/PAXIP1/NSD1/HCFC1/KDM4D/MCRS1/WDR5/ZNF335/CTR9/PRMT6/NELFE/EHMT2	25
BP	GO:0034968	histone lysine methylation	34/2099	127/18800	8.28776e-07	1.19736e-05	9.97643e-06	KDM1A/BRCA1/PHF20/RIF1/SMARCB1/SNW1/SUV39H1/PIH1D1/DOT1L/EZH2/SUPT6H/NSD2/MACROH2A1/RBBP5/DNMT1/MEN1/SMYD5/PWP1/KANSL2/SUV39H2/PAXIP1/DPY30/NSD1/HCFC1/BEND3/KMT5A/KDM4D/MCRS1/WDR5/ZNF335/CTR9/PRMT6/NELFE/EHMT2	34
BP	GO:0009113	purine nucleobase biosynthetic process	8/2099	10/18800	8.71963e-07	1.2488e-05	1.0405e-05	PAICS/PPAT/PRPS1/GART/GMPS/HPRT1/SHMT1/SHMT2	8
BP	GO:0031118	rRNA pseudouridine synthesis	8/2099	10/18800	8.71963e-07	1.2488e-05	1.0405e-05	RPUSD1/GAR1/DKC1/NAF1/NHP2/RPUSD3/RPUSD4/RPUSD2	8
BP	GO:2000234	positive regulation of rRNA processing	8/2099	10/18800	8.71963e-07	1.2488e-05	1.0405e-05	RIOK2/BUD23/DIMT1/WDR75/HEATR1/RIOK1/WDR43/UTP15	8
BP	GO:0006164	purine nucleotide biosynthetic process	45/2099	192/18800	9.6321e-07	1.3755e-05	1.14606e-05	AK2/SLC25A13/ELOVL5/COASY/ENO1/ACAT1/DLD/ACOT7/MTHFD1/GCDH/PDHX/ATP5F1B/ATP5PB/PANK2/PAICS/PPAT/ACSS2/ACLY/PDHA1/MYC/ADCY3/ATIC/PRPSAP2/PARP1/PRPS1/DLAT/ATP5F1A/ATP5MC3/ADK/SLC35B2/PANK4/GART/ATP5MC1/PRPSAP1/GMPS/VCP/STOML2/ATP5F1C/HPRT1/IMPDH2/PFAS/UQCC3/HACD2/NME1/ACACA	45
BP	GO:0007076	mitotic chromosome condensation	11/2099	19/18800	1.0531e-06	1.49954e-05	1.24941e-05	BAZ1B/NCAPD2/NCAPH2/NCAPG/SMC4/NCAPH/SMC2/CDCA5/NCAPD3/PLK1/KMT5A	11
BP	GO:0044843	cell cycle G1/S phase transition	55/2099	255/18800	1.10518e-06	1.56916e-05	1.30742e-05	DBF4/PAF1/MNAT1/CUL1/GTSE1/RBL1/CDC6/CDC7/CDKN3/APEX1/E2F1/FAM83D/CDK16/GSPT1/CCNE1/EZH2/CUL2/ZPR1/PPP2CA/EIF4G1/KIF14/CPSF3/KHDRBS1/STIL/PSME3/NASP/MEN1/CDK7/CDK4/MYC/CUL4A/RPTOR/CCNA2/MEPCE/EIF4E/CENPJ/SASS6/CDC25A/E2F7/BRD7/RRM1/RFWD3/E2F6/TRIAP1/RRM2/MTBP/CCNE2/POLE/RCC1/CHEK2/EIF4EBP1/DDRGK1/TFDP1/PHB2/PRKDC	55
BP	GO:0009156	ribonucleoside monophosphate biosynthetic process	15/2099	34/18800	1.16044e-06	1.63354e-05	1.36107e-05	CAD/DHODH/UMPS/PAICS/PPAT/ATIC/UCK2/PRPS1/ADK/GART/GMPS/HPRT1/IMPDH2/PFAS/UCKL1	15
BP	GO:0032212	positive regulation of telomere maintenance via telomerase	15/2099	34/18800	1.16044e-06	1.63354e-05	1.36107e-05	XRCC5/MAPKAPK5/CCT4/NEK2/TCP1/DKC1/HNRNPA1/CCT7/NAF1/CCT6A/CCT5/CCT8/CCT3/CCT2/AURKB	15
BP	GO:0051973	positive regulation of telomerase activity	15/2099	34/18800	1.16044e-06	1.63354e-05	1.36107e-05	XRCC5/HSP90AA1/MAPKAPK5/HSP90AB1/PTGES3/CCT4/NEK2/TCP1/DKC1/MYC/WRAP53/NVL/NAF1/CCT2/AURKB	15
BP	GO:0045039	protein insertion into mitochondrial inner membrane	9/2099	13/18800	1.24584e-06	1.73889e-05	1.44884e-05	AGK/TIMM13/TIMM9/TIMM8A/TIMM10/TIMM29/TIMM8B/TOMM70/TIMM22	9
BP	GO:0051988	regulation of attachment of spindle microtubules to kinetochore	9/2099	13/18800	1.24584e-06	1.73889e-05	1.44884e-05	SPAG5/ECT2/NEK2/KNSTRN/CCNB1/HNRNPU/RACGAP1/AURKB/RCC2	9
BP	GO:0098789	pre-mRNA cleavage required for polyadenylation	9/2099	13/18800	1.24584e-06	1.73889e-05	1.44884e-05	CPSF1/CSTF2/CPSF6/NCBP1/FIP1L1/CPSF7/CPSF4/CPSF2/NUDT21	9
BP	GO:0080009	mRNA methylation	10/2099	16/18800	1.24971e-06	1.73938e-05	1.44925e-05	NSUN2/TRMT6/PCIF1/CBLL1/METTL8/METTL16/VIRMA/TRMT61A/TRMT61B/TRMT10C	10
BP	GO:2000144	positive regulation of DNA-templated transcription, initiation	18/2099	47/18800	1.26683e-06	1.75826e-05	1.46498e-05	MED24/TAF2/TAF11/PSMC6/TAF6/CAND1/TBP/SUB1/MED1/TAF4/GTF2A2/TAF4B/TAF5/PAXIP1/MED30/TAF7/MED14/TAF9	18
BP	GO:0009152	purine ribonucleotide biosynthetic process	41/2099	170/18800	1.31746e-06	1.81831e-05	1.51502e-05	AK2/SLC25A13/ELOVL5/COASY/ENO1/ACAT1/DLD/ACOT7/GCDH/PDHX/ATP5F1B/ATP5PB/PANK2/PAICS/PPAT/ACSS2/ACLY/PDHA1/MYC/ADCY3/ATIC/PARP1/DLAT/ATP5F1A/ATP5MC3/ADK/SLC35B2/PANK4/GART/ATP5MC1/GMPS/VCP/STOML2/ATP5F1C/HPRT1/IMPDH2/PFAS/UQCC3/HACD2/NME1/ACACA	41
BP	GO:0072331	signal transduction by p53 class mediator	41/2099	170/18800	1.31746e-06	1.81831e-05	1.51502e-05	KDM1A/E2F2/GTSE1/AURKA/MAPKAPK5/TFAP4/PRMT5/SNW1/E2F1/PSMD10/USP10/FOXM1/PAK1IP1/RPL5/MYBBP1A/EIF5A/URB2/MYC/BRCA2/COPS3/CHEK1/PAXIP1/HNRNPK/E2F7/ING2/HINT1/TRIAP1/RPS7/TP53RK/ATAD5/AURKB/RRS1/AEN/CHEK2/KMT5A/RPF2/MTOR/PRMT6/BAG6/BOP1/TAF9	41
BP	GO:0044773	mitotic DNA damage checkpoint signaling	25/2099	81/18800	1.39023e-06	1.9134e-05	1.59425e-05	BRCA1/MRE11/TIPIN/GTSE1/CLSPN/MSH2/FZR1/RINT1/MDC1/TICRR/DTL/FANCD2/CHEK1/RAD17/EME1/DONSON/TOPBP1/PLK1/RFWD3/CDK1/TRIAP1/CHEK2/BRCC3/BLM/PRKDC	25
BP	GO:0090224	regulation of spindle organization	17/2099	43/18800	1.47909e-06	2.03006e-05	1.69144e-05	TACC3/SPAG5/TPX2/RAE1/CHMP4B/FSD1/GPSM2/PSRC1/BORA/HNRNPU/CCSAP/KIF15/PLK1/DRG1/DYNC1H1/DCTN1/NUP62	17
BP	GO:0032206	positive regulation of telomere maintenance	19/2099	52/18800	1.49574e-06	2.04155e-05	1.70102e-05	MRE11/XRCC5/MAPKAPK5/CCT4/NEK2/TCP1/HNRNPA2B1/DKC1/HNRNPA1/CCT7/HNRNPD/NABP2/NAF1/CCT6A/CCT5/CCT8/CCT3/CCT2/AURKB	19
BP	GO:0065002	intracellular protein transmembrane transport	19/2099	52/18800	1.49574e-06	2.04155e-05	1.70102e-05	HSPA5/TIMM21/SRP54/TIMM44/TIMM50/AKT2/GRPEL1/TOMM40/SEC61G/TIMM17A/PEX5/HSPD1/TOMM70/AIFM1/PEX10/CHCHD4/GRPEL2/TOMM20/TIMM23	19
BP	GO:2000142	regulation of DNA-templated transcription, initiation	20/2099	57/18800	1.672e-06	2.27356e-05	1.89433e-05	MED24/TAF2/TAF11/PSMC6/TAF6/CAND1/TBP/SUB1/MED1/TAF4/CDK4/GTF2A2/TAF4B/TAF5/PAXIP1/MED30/TAF7/MED14/HMGB1/TAF9	20
BP	GO:0060236	regulation of mitotic spindle organization	16/2099	39/18800	1.67492e-06	2.27356e-05	1.89433e-05	TACC3/TPX2/RAE1/CHMP4B/FSD1/GPSM2/PSRC1/BORA/HNRNPU/CCSAP/KIF15/PLK1/DRG1/DYNC1H1/DCTN1/NUP62	16
BP	GO:0000027	ribosomal large subunit assembly	13/2099	27/18800	1.78252e-06	2.4064e-05	2.00501e-05	MRTO4/NLE1/RPLP0/BRIX1/FASTKD2/RPL5/TRAF7/RRS1/DDX28/RPF2/RPL23A/MRPL20/BOP1	13
BP	GO:0002183	cytoplasmic translational initiation	13/2099	27/18800	1.78252e-06	2.4064e-05	2.00501e-05	EIF2B3/EIF3I/EIF3D/EIF5/EIF4H/EIF3A/EIF4G1/EIF2S2/EIF2S3/DENR/EIF3M/SLBP/MTOR	13
BP	GO:0009895	negative regulation of catabolic process	65/2099	324/18800	1.81299e-06	2.44087e-05	2.03373e-05	CYP51A1/POLDIP2/NSUN2/PHF23/THRAP3/USP36/YBX1/ELAVL1/FUS/HNRNPC/HSP90AB1/CSNK2A1/E2F1/CHMP4B/USP14/SGTA/RGP1/GIT1/HMGCR/EIF4G1/PDCL3/PARK7/MAD2L2/UCHL5/SLIRP/TARDBP/TENT4B/ZCCHC17/RPL5/PSMF1/METTL16/DKC1/SYNCRIP/DHX9/LRPPRC/HNRNPD/FOXK2/NAF1/TLK2/SNX12/EIF3H/NBAS/HNRNPU/AZIN1/LARP1/ATP13A2/DFFA/UBQLN4/MAD2L1/CAMLG/PHAX/BAG5/PBK/RPS7/SMCR8/HNRNPA0/RBM10/PKP3/SF3B3/HNRNPAB/DDRGK1/MTOR/EHMT2/BAG6/TA…	65
BP	GO:0000002	mitochondrial genome maintenance	14/2099	31/18800	1.87411e-06	2.5163e-05	2.09658e-05	DNAJA3/SSBP1/TWNK/MGME1/DNA2/PIF1/POLG/PARP1/STOML2/RRM1/SLC25A33/TOP3A/LONP1/OPA1	14
BP	GO:0006379	mRNA cleavage	11/2099	20/18800	2.10334e-06	2.80124e-05	2.33399e-05	CPSF1/CSTF2/CPSF6/CPSF3/NCBP1/FIP1L1/CPSF7/CPSF4/CPSF2/NUDT21/CSTF3	11
BP	GO:0008334	histone mRNA metabolic process	11/2099	20/18800	2.10334e-06	2.80124e-05	2.33399e-05	UPF1/MTPAP/CPSF3/TENT4B/NCBP1/SSB/ZNF473/SLBP/CPSF2/EXOSC10/EXOSC4	11
BP	GO:0048025	negative regulation of mRNA splicing, via spliceosome	11/2099	20/18800	2.10334e-06	2.80124e-05	2.33399e-05	PTBP1/U2AF2/C1QBP/SRSF9/SRSF7/HNRNPA2B1/RBMX/HNRNPK/RBM10/SRSF10/RNPS1	11
BP	GO:0010257	NADH dehydrogenase complex assembly	20/2099	58/18800	2.28567e-06	3.02774e-05	2.52271e-05	NDUFAB1/NDUFS1/TIMM21/DMAC2/COA1/FOXRED1/NDUFAF4/NDUFB5/NDUFB11/NDUFB9/OXA1L/NDUFAF6/NDUFS2/NDUFAF2/NDUFB6/ACAD9/NDUFA12/TMEM186/NDUFA6/NDUFS3	20
BP	GO:0032981	mitochondrial respiratory chain complex I assembly	20/2099	58/18800	2.28567e-06	3.02774e-05	2.52271e-05	NDUFAB1/NDUFS1/TIMM21/DMAC2/COA1/FOXRED1/NDUFAF4/NDUFB5/NDUFB11/NDUFB9/OXA1L/NDUFAF6/NDUFS2/NDUFAF2/NDUFB6/ACAD9/NDUFA12/TMEM186/NDUFA6/NDUFS3	20
BP	GO:0031398	positive regulation of protein ubiquitination	32/2099	121/18800	2.30144e-06	3.04048e-05	2.53333e-05	KDM1A/SPRTN/BRCA1/PHF23/HSPA5/HUWE1/TRIB3/PSMD10/AXIN1/FZR1/AIMP2/UBE2S/CDC20/MASTL/HSPBP1/UBQLN1/DERL1/DCUN1D5/FANCI/TBC1D7/RNF20/PAXIP1/PLK1/UBE2V2/CENPX/HDAC3/UBE2C/UBE2N/AMER1/UBE2L3/FANCM/CTR9	32
BP	GO:0071806	protein transmembrane transport	21/2099	63/18800	2.4064e-06	3.17067e-05	2.6418e-05	HSPA5/TIMM21/TOMM22/SRP54/TIMM44/TIMM50/AKT2/GRPEL1/TOMM40/SEC61G/TIMM17A/PEX5/HSPD1/TOMM70/AIFM1/PEX10/CHCHD4/GRPEL2/TOMM20/TIMM22/TIMM23	21
BP	GO:0016578	histone deubiquitination	16/2099	40/18800	2.50295e-06	3.28911e-05	2.74049e-05	USP36/TAF2/SART3/ATXN7L3/TAF6/ENY2/TAF4/TAF5L/TAF5/TAF6L/SF3B5/ASXL1/TAF7/BRCC3/SF3B3/TAF9	16
BP	GO:0019985	translesion synthesis	12/2099	24/18800	2.70711e-06	3.54796e-05	2.95616e-05	POLDIP2/SPRTN/POLD1/POLD3/POLE2/USP10/POLD2/MAD2L2/PCNA/DTL/VCP/PCLAF	12
BP	GO:0070525	tRNA threonylcarbamoyladenosine metabolic process	10/2099	17/18800	2.72996e-06	3.55903e-05	2.96538e-05	HSD17B10/CDK5RAP1/TRMT5/TPRKB/RPUSD4/TRMT61B/TP53RK/TRMT10C/PUS1/LAGE3	10
BP	GO:0071816	tail-anchored membrane protein insertion into ER membrane	10/2099	17/18800	2.72996e-06	3.55903e-05	2.96538e-05	EMC9/UBL4A/SGTA/EMC1/EMC4/EMC8/CAMLG/MMGT1/GET3/BAG6	10
BP	GO:0044743	protein transmembrane import into intracellular organelle	15/2099	36/18800	2.80067e-06	3.64161e-05	3.03419e-05	TIMM21/TIMM44/TIMM50/GRPEL1/TOMM40/TIMM17A/PEX5/HSPD1/TOMM70/AIFM1/PEX10/CHCHD4/GRPEL2/TOMM20/TIMM23	15
BP	GO:0071478	cellular response to radiation	43/2099	187/18800	2.83436e-06	3.67574e-05	3.06263e-05	KDM1A/BRCA1/HSPA5/RAD51/POLD1/TMEM161A/POLD3/XRCC5/YY1/ACTR5/EEF1D/AKT2/RAD51AP1/RAD1/ECT2/ELK1/FIGNL1/PCNA/EIF2S1/NMT1/MYC/BRCA2/INTS7/PARP1/TLK2/CHEK1/CDC25A/DDB1/PBK/TRIAP1/PPID/RHNO1/AURKB/NPM1/RUVBL2/CHEK2/HSF1/BRCC3/KDM4D/H2AX/NOC2L/XRCC6/BLM	43
BP	GO:1900182	positive regulation of protein localization to nucleus	25/2099	84/18800	2.91984e-06	3.77668e-05	3.14673e-05	IPO5/RBM22/HSP90AB1/ZPR1/ECT2/CCT4/PARK7/TCP1/TARDBP/TRIM28/DKC1/RAN/CCT7/PARP1/CCT6A/MEPCE/CCT5/CCT8/CCT3/CCT2/PLK1/CDK1/HDAC3/MCRS1/PINX1	25
BP	GO:0007064	mitotic sister chromatid cohesion	13/2099	28/18800	2.98717e-06	3.83691e-05	3.19691e-05	SMC1A/SMC3/MACROH2A1/CDC20/NAA50/SGO1/SLF1/DSCC1/BOD1/CDCA5/NSMCE2/RAD21/HASPIN	13
BP	GO:0010971	positive regulation of G2/M transition of mitotic cell cycle	13/2099	28/18800	2.98717e-06	3.83691e-05	3.19691e-05	CDC7/CDC25B/RAD51C/FBXO5/CCNB1/CDK4/DTL/CDC25C/DBF4B/CDC25A/RRM1/CDK1/RCC2	13
BP	GO:0008156	negative regulation of DNA replication	14/2099	32/18800	2.9897e-06	3.83691e-05	3.19691e-05	TIPIN/CDC6/GTPBP4/TIMELESS/FBXO5/GMNN/ZRANB3/SMARCAL1/BRCA2/TERF1/RAD17/DONSON/CDT1/BLM	14
BP	GO:0000082	G1/S transition of mitotic cell cycle	49/2099	225/18800	3.13229e-06	3.97902e-05	3.31532e-05	DBF4/MNAT1/CUL1/GTSE1/RBL1/CDC6/CDC7/CDKN3/APEX1/E2F1/CDK16/GSPT1/CCNE1/EZH2/CUL2/ZPR1/PPP2CA/EIF4G1/KIF14/CPSF3/KHDRBS1/STIL/PSME3/NASP/CDK7/CDK4/MYC/CUL4A/RPTOR/MEPCE/EIF4E/CENPJ/SASS6/CDC25A/E2F7/BRD7/RRM1/RFWD3/E2F6/TRIAP1/RRM2/MTBP/CCNE2/POLE/RCC1/CHEK2/EIF4EBP1/TFDP1/PRKDC	49
BP	GO:0006177	GMP biosynthetic process	9/2099	14/18800	3.14069e-06	3.97902e-05	3.31532e-05	PAICS/PPAT/ATIC/ADK/GART/GMPS/HPRT1/IMPDH2/PFAS	9
BP	GO:0007100	mitotic centrosome separation	9/2099	14/18800	3.14069e-06	3.97902e-05	3.31532e-05	NDE1/AURKA/RANBP1/KIF3B/NEK2/CEP85/KIF11/CHEK1/NUP62	9
BP	GO:0051984	positive regulation of chromosome segregation	9/2099	14/18800	3.14069e-06	3.97902e-05	3.31532e-05	RAD18/CDC6/MAD2L1BP/CCNB1/HNRNPU/SMC6/CDT1/AURKB/RCC2	9
BP	GO:0098787	mRNA cleavage involved in mRNA processing	9/2099	14/18800	3.14069e-06	3.97902e-05	3.31532e-05	CPSF1/CSTF2/CPSF6/NCBP1/FIP1L1/CPSF7/CPSF4/CPSF2/NUDT21	9
BP	GO:0009314	response to radiation	81/2099	438/18800	3.15374e-06	3.98533e-05	3.32057e-05	KDM1A/SPRTN/BRCA1/HSPA5/ERCC8/RAD51/POLD1/TMEM161A/KARS1/FECH/SMC1A/TIPIN/POLD3/XRCC5/RAD54L/MSH2/YY1/ACTR5/EEF1D/ERCC2/AKT2/BRAT1/RAD51AP1/RNF8/HMGCR/RAD1/ECT2/MSH6/B4GALT2/ZRANB3/CEP250/ELK1/NPHP4/FIGNL1/PCNA/MEN1/EIF2S1/NMT1/MYC/NABP2/BRCA2/TICRR/COPS3/DTL/INTS7/PARP1/FANCD2/TLK2/CHEK1/XRCC4/PAXIP1/USP1/ERCC3/TOPBP1/CDC25A/PCLAF/DDB1/PBK/RFWD3/FEN1/TRIAP1/PPID/RHNO1/PPP1CA/RIC8A/AURKB/AEN/NPM1…	81
BP	GO:0051298	centrosome duplication	23/2099	74/18800	3.17849e-06	4.00636e-05	3.3381e-05	BRCA1/NDE1/WDR62/NDC80/XPO1/CHMP4B/CEP76/CEP72/STIL/NAT10/BRCA2/PLK4/CENPJ/SASS6/CCNF/SAC3D1/CNTROB/CKAP5/RTTN/GEN1/NPM1/NUP62/RBM14	23
BP	GO:2000781	positive regulation of double-strand break repair	21/2099	64/18800	3.2073e-06	4.03239e-05	3.35978e-05	DDX11/RIF1/FUS/MRGBP/FOXM1/RAD51AP1/TIMELESS/MAD2L2/YEATS4/SLF1/ACTL6A/WRAP53/PARP1/MMS19/UBE2V2/RUVBL1/UBE2N/FANCB/RUVBL2/KDM4D/PRKDC	21
BP	GO:0043543	protein acylation	54/2099	258/18800	3.59237e-06	4.49791e-05	3.74766e-05	MED24/BRCA1/PHF20/TAF2/ATXN7L3/DLD/SMARCB1/MRGBP/PIH1D1/OGDH/TAF6/PARK7/SET/DLST/ENY2/NAA50/GTF3C4/YEATS4/HAT1/TAF4/NAA35/NAT10/TAF5L/ZDHHC4/NMT1/ACTL6A/DSCC1/BRCA2/KANSL2/NAA30/GOLGA7/POLE3/TAF5/KAT14/CHEK1/PAXIP1/TAF6L/YEATS2/NAA15/BRD7/ZDHHC16/ESCO2/HCFC1/NAA20/RUVBL1/BEND3/TAF7/RUVBL2/MCRS1/NOC2L/WDR5/HDAC2/BAG6/TAF9	54
BP	GO:1904029	regulation of cyclin-dependent protein kinase activity	28/2099	101/18800	3.59578e-06	4.49791e-05	3.74766e-05	MNAT1/IPO5/TFAP4/CDC6/HSP90AB1/CDKN3/CDK5RAP1/PSMD10/CCNE1/GTPBP4/BCCIP/CKS2/PKMYT1/MEN1/CCNB1/CDK7/PSRC1/CCNA2/CCNB2/CDC25C/CCNF/CDC25A/PLK1/CKS1B/CCNE2/CDK5R1/BLM/IPO7	28
BP	GO:0030488	tRNA methylation	16/2099	41/18800	3.68069e-06	4.59249e-05	3.82647e-05	NSUN2/METTL1/FTSJ1/HSD17B10/METTL2A/TRMT6/THADA/METTL8/TRMT5/GTPBP3/WDR4/TRMT61A/TRMT61B/TRMT10C/TRMT12/METTL6	16
BP	GO:0000381	regulation of alternative mRNA splicing, via spliceosome	20/2099	60/18800	4.1611e-06	5.17884e-05	4.31501e-05	PTBP1/THRAP3/HNRNPL/FXR1/KHDRBS1/SMU1/FXR2/HNRNPA1/TRA2B/RBMX/CELF1/HNRNPU/SRSF2/RAVER1/MAGOH/RBM15/PUF60/RBM10/RNPS1/RBM8A	20
BP	GO:0061136	regulation of proteasomal protein catabolic process	43/2099	190/18800	4.38753e-06	5.44693e-05	4.53838e-05	PSMC4/USP13/KEAP1/XPO1/AURKA/HSP90AB1/DESI1/PSMC6/PSMC1/TRIB3/USP14/PSMD10/AXIN1/SGTA/FZR1/USP5/PSMD14/SUMO1/PARK7/UCHL5/CDC20/PSMF1/PSME3/HSPBP1/UBQLN1/NUDT15/BBS7/TLK2/EIF3H/UBQLN4/PSMC2/CAMLG/VCP/PSMC3/BAG5/PLK1/PBK/GLMN/RAD23A/SUMO2/DDRGK1/BAG6/TAF9	43
BP	GO:0007143	female meiotic nuclear division	14/2099	33/18800	4.65985e-06	5.77051e-05	4.80799e-05	NCAPH2/TRIP13/NDC80/AURKA/CDC25B/RAD51C/FBXO5/TTK/MASTL/NCAPH/TOP2A/CCNB2/WASHC5/PLK1	14
BP	GO:0019693	ribose phosphate metabolic process	74/2099	394/18800	4.68581e-06	5.78815e-05	4.82269e-05	AK2/SLC25A13/ELOVL5/GNAI3/COASY/ENO1/ACAT1/CAD/DLD/ACOT7/ACOT8/PGK1/DHODH/GPI/GCDH/OGDH/GIT1/PDHX/ATP5F1B/GAPDH/TPI1/HMGCR/UMPS/ATP5PB/DLST/PANK2/ITPA/PAICS/PPAT/ACSS2/ACLY/PDHA1/RAN/LDHA/MYC/ADCY3/ATIC/PRPSAP2/FOXK2/UCK2/PARP1/PRPS1/DLAT/ATP5F1A/PFKM/ATP5MC3/ADK/SLC35B2/PANK4/GART/ATP5MC1/PRPSAP1/GMPS/TKT/VCP/STOML2/NUDT5/ATP5F1C/HPRT1/HINT1/PGAM1/CTPS1/IMPDH2/PFAS/PRKAG1/FITM2/UCKL1/PNP/OPA1/UQ…	74
BP	GO:0006359	regulation of transcription by RNA polymerase III	13/2099	29/18800	4.86104e-06	5.95989e-05	4.96579e-05	BAZ1B/CHD8/BRF2/POLR3G/DEK/MYBBP1A/POLR3F/RPTOR/ZC3H8/DDX21/MAF1/POLR3C/MTOR	13
BP	GO:0035521	monoubiquitinated histone deubiquitination	13/2099	29/18800	4.86104e-06	5.95989e-05	4.96579e-05	TAF2/ATXN7L3/TAF6/ENY2/TAF4/TAF5L/TAF5/TAF6L/SF3B5/ASXL1/TAF7/SF3B3/TAF9	13
BP	GO:0035522	monoubiquitinated histone H2A deubiquitination	13/2099	29/18800	4.86104e-06	5.95989e-05	4.96579e-05	TAF2/ATXN7L3/TAF6/ENY2/TAF4/TAF5L/TAF5/TAF6L/SF3B5/ASXL1/TAF7/SF3B3/TAF9	13
BP	GO:0006473	protein acetylation	47/2099	216/18800	5.05503e-06	6.18241e-05	5.15118e-05	MED24/BRCA1/PHF20/TAF2/ATXN7L3/SMARCB1/MRGBP/PIH1D1/TAF6/PARK7/SET/ENY2/NAA50/GTF3C4/YEATS4/HAT1/TAF4/NAA35/NAT10/TAF5L/ACTL6A/DSCC1/BRCA2/KANSL2/NAA30/POLE3/TAF5/KAT14/CHEK1/PAXIP1/TAF6L/YEATS2/NAA15/BRD7/ESCO2/HCFC1/NAA20/RUVBL1/BEND3/TAF7/RUVBL2/MCRS1/NOC2L/WDR5/HDAC2/BAG6/TAF9	47
BP	GO:0017148	negative regulation of translation	52/2099	248/18800	5.11453e-06	6.23973e-05	5.19894e-05	UPF1/YBX1/EXOSC5/EIF2AK1/CNOT3/KHSRP/PUS7/PCIF1/EIF3E/EXOSC3/GAPDH/FXR1/NCL/PAIP2/TARDBP/TENT4B/EXOSC9/AGO2/METTL16/FXR2/ILF3/EXOSC2/EIF2S1/SYNCRIP/CAPRIN1/DHX9/EPRS1/PNPT1/HNRNPD/EIF4A3/NT5C3B/POLR2D/CNOT9/CELF1/RPS3/YTHDF1/EIF4E/HNRNPU/LARP1/MALSU1/POLR2G/MRPL13/TYMS/SHMT1/CALR/SHMT2/CNOT10/EIF4EBP1/CNOT7/DHFR/EIF6/LSM14A	52
BP	GO:0042176	regulation of protein catabolic process	74/2099	395/18800	5.14879e-06	6.26606e-05	5.22088e-05	CYP51A1/PSMC4/USP13/NRDC/ITCH/KEAP1/HSP90AA1/XPO1/HUWE1/AURKA/HSP90AB1/DESI1/PSMC6/PSMC1/TRIB3/CSNK2A1/FAM83D/USP14/PSMD10/CCDC22/AXIN1/SGTA/FZR1/RGP1/PSMD3/USP5/HMGCR/PSMD14/PDCL3/ODC1/SUMO1/PARK7/MAD2L2/UCHL5/TMEM9/CDC20/AREL1/RPL5/PSMF1/PSME3/HSPBP1/UBQLN1/NUDT15/BBS7/DTL/TLK2/SNX12/EIF3H/AZIN1/ATP13A2/UBQLN4/PSMC2/MAD2L1/CAMLG/VCP/PSMC3/BAG5/PLK1/DDB1/PBK/RPS7/PSMD1/UBXN2A/GLMN/PSMD2/RAD23A/C…	74
BP	GO:0051438	regulation of ubiquitin-protein transferase activity	19/2099	56/18800	5.35852e-06	6.50527e-05	5.42019e-05	TRIB3/AXIN1/FZR1/UBE2S/FBXO5/PARK7/MAD2L2/CDC20/MASTL/RPL5/DCUN1D5/BUB1B/MAD2L1/BAG5/PLK1/RPS7/UBE2C/UBE2N/UBE2L3	19
BP	GO:1903050	regulation of proteolysis involved in cellular protein catabolic process	48/2099	223/18800	5.51593e-06	6.65909e-05	5.54836e-05	PSMC4/USP13/KEAP1/XPO1/AURKA/HSP90AB1/DESI1/PSMC6/PSMC1/TRIB3/CSNK2A1/USP14/PSMD10/CCDC22/AXIN1/SGTA/FZR1/USP5/PSMD14/PDCL3/SUMO1/PARK7/UCHL5/CDC20/RPL5/PSMF1/PSME3/HSPBP1/UBQLN1/NUDT15/BBS7/TLK2/EIF3H/UBQLN4/PSMC2/CAMLG/VCP/PSMC3/BAG5/PLK1/PBK/RPS7/GLMN/RAD23A/SUMO2/DDRGK1/BAG6/TAF9	48
BP	GO:0019081	viral translation	10/2099	18/18800	5.52566e-06	6.65909e-05	5.54836e-05	PTBP1/EIF3L/EIF3D/EIF3B/EIF3A/EIF3G/DHX9/SSB/DENR/EIF3F	10
BP	GO:0031145	anaphase-promoting complex-dependent catabolic process	10/2099	18/18800	5.52566e-06	6.65909e-05	5.54836e-05	CDC27/ANAPC5/CDC23/FZR1/UBE2S/CDC20/ANAPC1/PLK1/UBE2C/ANAPC7	10
BP	GO:0043489	RNA stabilization	21/2099	66/18800	5.57319e-06	6.70003e-05	5.58247e-05	NSUN2/THRAP3/YBX1/ELAVL1/FUS/HNRNPC/E2F1/TARDBP/TENT4B/ZCCHC17/METTL16/DKC1/SYNCRIP/DHX9/HNRNPD/NAF1/HNRNPU/LARP1/PHAX/HNRNPA0/RBM10	21
BP	GO:0000079	regulation of cyclin-dependent protein serine/threonine kinase activity	27/2099	98/18800	6.05933e-06	7.26679e-05	6.05469e-05	MNAT1/IPO5/TFAP4/CDC6/CDKN3/CDK5RAP1/PSMD10/CCNE1/GTPBP4/BCCIP/CKS2/PKMYT1/MEN1/CCNB1/CDK7/PSRC1/CCNA2/CCNB2/CDC25C/CCNF/CDC25A/PLK1/CKS1B/CCNE2/CDK5R1/BLM/IPO7	27
BP	GO:0046822	regulation of nucleocytoplasmic transport	28/2099	104/18800	6.66894e-06	7.97851e-05	6.64769e-05	NSUN2/RIOK2/IPO5/XPO1/RBM22/AAAS/HSP90AB1/RANGAP1/EMD/YWHAE/SUPT6H/ZPR1/CPSF6/ECT2/SUMO1/PARK7/TARDBP/KHDRBS1/NUP153/TRIM28/RAN/DHX9/ANP32B/NUP54/NOLC1/CDK1/HDAC3/PPP1CC	28
BP	GO:0045842	positive regulation of mitotic metaphase/anaphase transition	9/2099	15/18800	7.07015e-06	8.3975e-05	6.9968e-05	CDC27/ANAPC5/CDC23/MAD2L1BP/DLGAP5/ESPL1/NSMCE2/CDT1/ANAPC7	9
BP	GO:1901970	positive regulation of mitotic sister chromatid separation	9/2099	15/18800	7.07015e-06	8.3975e-05	6.9968e-05	CDC27/ANAPC5/CDC23/MAD2L1BP/DLGAP5/ESPL1/NSMCE2/CDT1/ANAPC7	9
BP	GO:1902570	protein localization to nucleolus	9/2099	15/18800	7.07015e-06	8.3975e-05	6.9968e-05	POLR1A/BYSL/UTP25/RAN/NVL/RRS1/MCRS1/RPF2/PINX1	9
BP	GO:0035520	monoubiquitinated protein deubiquitination	14/2099	34/18800	7.10944e-06	8.40377e-05	7.00202e-05	TAF2/ATXN7L3/TAF6/ENY2/TAF4/TAF5L/TAF5/TAF6L/USP1/SF3B5/ASXL1/TAF7/SF3B3/TAF9	14
BP	GO:1901976	regulation of cell cycle checkpoint	14/2099	34/18800	7.10944e-06	8.40377e-05	7.00202e-05	NDC80/WDR76/THOC5/ANAPC15/MAD2L1BP/PCID2/CCNB1/CUL4A/DYNC1LI1/MAD2L1/CDT1/RFWD3/GEN1/CHEK2	14
BP	GO:0051123	RNA polymerase II preinitiation complex assembly	13/2099	30/18800	7.7024e-06	9.00756e-05	7.5051e-05	TAF2/TAF11/PSMC6/TAF6/CAND1/TBP/TAF4/GTF2A2/TAF5/TAF6L/TAF7/HMGB1/TAF9	13
BP	GO:0070979	protein K11-linked ubiquitination	13/2099	30/18800	7.7024e-06	9.00756e-05	7.5051e-05	CDC27/UBE2T/ANAPC5/CDC23/FZR1/UBE2S/AREL1/ANAPC1/RNF26/UBE2C/CDC26/UBE2L3/ANAPC7	13
BP	GO:1903362	regulation of cellular protein catabolic process	53/2099	258/18800	7.77768e-06	9.00756e-05	7.5051e-05	PSMC4/USP13/KEAP1/HSP90AA1/XPO1/AURKA/HSP90AB1/DESI1/PSMC6/PSMC1/TRIB3/CSNK2A1/USP14/PSMD10/CCDC22/AXIN1/SGTA/FZR1/RGP1/USP5/PSMD14/PDCL3/SUMO1/PARK7/UCHL5/CDC20/RPL5/PSMF1/PSME3/HSPBP1/UBQLN1/NUDT15/BBS7/TLK2/EIF3H/ATP13A2/UBQLN4/PSMC2/CAMLG/VCP/PSMC3/BAG5/PLK1/PBK/RPS7/GLMN/RAD23A/AMER1/FAF1/SUMO2/DDRGK1/BAG6/TAF9	53
BP	GO:0000491	small nucleolar ribonucleoprotein complex assembly	8/2099	12/18800	7.79381e-06	9.00756e-05	7.5051e-05	NUFIP1/SNU13/PIH1D1/NAF1/RUVBL1/RUVBL2/ZNHIT3/TAF9	8
BP	GO:0031126	sno(s)RNA 3'-end processing	8/2099	12/18800	7.79381e-06	9.00756e-05	7.5051e-05	EXOSC5/FBL/EXOSC3/TENT4B/EXOSC2/DKC1/EXOSC10/EXOSC4	8
BP	GO:0090646	mitochondrial tRNA processing	8/2099	12/18800	7.79381e-06	9.00756e-05	7.5051e-05	ELAC2/HSD17B10/CDK5RAP1/TRMT5/RPUSD4/TRMT61B/TRMT10C/PUS1	8
BP	GO:1905214	regulation of RNA binding	8/2099	12/18800	7.79381e-06	9.00756e-05	7.5051e-05	GEMIN2/EIF3D/EIF3E/EIF4G1/NCBP1/EIF4A3/CARM1/EIF3C	8
BP	GO:0006312	mitotic recombination	12/2099	26/18800	7.80255e-06	9.00756e-05	7.5051e-05	MRE11/RAD51/XRCC1/MSH2/ERCC2/RAD51C/BRCA2/TPRKB/NSMCE2/SMC6/GEN1/RAD51D	12
BP	GO:0016226	iron-sulfur cluster assembly	12/2099	26/18800	7.80255e-06	9.00756e-05	7.5051e-05	CIAPIN1/GLRX3/HSPA9/ABCB7/CIAO1/MMS19/CIAO2A/NFU1/IBA57/GLRX5/LYRM4/NFS1	12
BP	GO:0031163	metallo-sulfur cluster assembly	12/2099	26/18800	7.80255e-06	9.00756e-05	7.5051e-05	CIAPIN1/GLRX3/HSPA9/ABCB7/CIAO1/MMS19/CIAO2A/NFU1/IBA57/GLRX5/LYRM4/NFS1	12
BP	GO:0031056	regulation of histone modification	40/2099	176/18800	8.3746e-06	9.64543e-05	8.03658e-05	KDM1A/PAF1/BRCA1/PHF20/SART3/RIF1/SMARCB1/SNW1/SUV39H1/PIH1D1/SUPT6H/MACROH2A1/PARK7/SET/DNMT1/KANSL2/NCAPG2/KAT14/CHEK1/RNF20/PAXIP1/YEATS2/NSD1/BRD7/OTUB1/ING2/HCFC1/UBE2N/TAF7/RUVBL2/KDM4D/MCRS1/NOC2L/WDR5/ZNF335/CTR9/PRMT6/NELFE/EHMT2/PARG	40
BP	GO:0006513	protein monoubiquitination	23/2099	78/18800	8.53889e-06	9.81179e-05	8.17518e-05	PAF1/CUL1/RAD18/UBE2T/HUWE1/ATXN7L3/KDM2B/UBE2R2/FANCE/PCGF1/DTL/RNF20/PCGF6/FANCC/LEO1/ZNF598/DDB1/UBE2O/FANCB/FANCA/FANCM/CTR9/UHRF1	23
BP	GO:0016574	histone ubiquitination	17/2099	48/18800	8.62763e-06	9.89074e-05	8.24097e-05	KDM1A/PAF1/HUWE1/ATXN7L3/KDM2B/RNF8/PCGF1/PARK7/RNF20/PCGF6/LEO1/OTUB1/DDB1/UBE2N/SUZ12/CTR9/UHRF1	17
BP	GO:0009141	nucleoside triphosphate metabolic process	29/2099	111/18800	8.72704e-06	9.98156e-05	8.31663e-05	SLC25A13/GNAI3/ENO1/CAD/ATP5F1B/ATP5PB/ITPA/DUT/RAN/NUDT15/MYC/UCK2/PARP1/ATP5F1A/ATP5MC3/ADK/ATP5MC1/VCP/STOML2/ATP5F1C/DTYMK/CTPS1/TYMS/IMPDH2/DCTPP1/UCKL1/OPA1/UQCC3/NME1	29
BP	GO:0009411	response to UV	35/2099	146/18800	8.79466e-06	0.000100357	8.36171e-05	KDM1A/SPRTN/ERCC8/POLD1/TMEM161A/TIPIN/POLD3/MSH2/YY1/ACTR5/ERCC2/MSH6/ZRANB3/PCNA/MEN1/EIF2S1/MYC/BRCA2/DTL/PARP1/CHEK1/USP1/ERCC3/CDC25A/PCLAF/DDB1/PBK/FEN1/TRIAP1/PPID/RHNO1/AURKB/NPM1/RUVBL2/NOC2L	35
BP	GO:0006289	nucleotide-excision repair	19/2099	58/18800	9.5968e-06	0.000109258	9.10335e-05	MNAT1/ERCC8/POLD1/NTHL1/POLD3/ERCC2/RPA3/GTF2H3/RPA1/BRIP1/BRCA2/CUL4A/MMS19/FANCC/ERCC3/DDB1/POLE/RAD23A/GTF2H2C	19
BP	GO:0006368	transcription elongation from RNA polymerase II promoter	20/2099	63/18800	9.62455e-06	0.000109322	9.10868e-05	PAF1/ELOA/SUPT16H/NELFCD/AXIN1/EZH2/SUPT6H/RNF8/ENY2/GTF2F1/PCID2/ADRM1/HNRNPU/ERCC3/WDR43/LEO1/CDK12/SUPT5H/CTR9/NELFE	20
BP	GO:0007095	mitotic G2 DNA damage checkpoint signaling	14/2099	35/18800	1.06348e-05	0.00012052	0.000100417	BRCA1/MRE11/CLSPN/FZR1/RINT1/TICRR/DTL/CHEK1/DONSON/TOPBP1/PLK1/CDK1/BRCC3/BLM	14
BP	GO:2000058	regulation of ubiquitin-dependent protein catabolic process	38/2099	166/18800	1.16873e-05	0.000132144	0.000110102	KEAP1/XPO1/AURKA/HSP90AB1/DESI1/TRIB3/CSNK2A1/USP14/PSMD10/CCDC22/AXIN1/SGTA/FZR1/USP5/PDCL3/SUMO1/PARK7/UCHL5/CDC20/RPL5/HSPBP1/UBQLN1/BBS7/TLK2/EIF3H/UBQLN4/CAMLG/VCP/BAG5/PLK1/PBK/RPS7/GLMN/RAD23A/SUMO2/DDRGK1/BAG6/TAF9	38
BP	GO:0030261	chromosome condensation	17/2099	49/18800	1.18444e-05	0.000133311	0.000111074	BAZ1B/NCAPD2/NCAPH2/NCAPG/SMC4/NCAPH/TOP2A/SMC2/CDCA5/NCAPG2/NCAPD3/AIFM1/PLK1/DFFB/CDK1/BANF1/KMT5A	17
BP	GO:2000059	negative regulation of ubiquitin-dependent protein catabolic process	17/2099	49/18800	1.18444e-05	0.000133311	0.000111074	HSP90AB1/CSNK2A1/USP14/SGTA/PDCL3/PARK7/UCHL5/RPL5/TLK2/EIF3H/CAMLG/BAG5/PBK/RPS7/DDRGK1/BAG6/TAF9	17
BP	GO:0006099	tricarboxylic acid cycle	13/2099	31/18800	1.19117e-05	0.000133763	0.000111452	MDH1/CS/FH/ACO2/IDH3B/OGDH/SDHB/DLST/PDHA1/SDHC/MDH2/DLAT/SUCLG1	13
BP	GO:0097193	intrinsic apoptotic signaling pathway	58/2099	295/18800	1.20714e-05	0.000135249	0.000112689	KDM1A/E2F2/BRCA1/CUL1/TMEM161A/ENO1/DNAJA1/SNW1/TRIB3/E2F1/PIAS4/CUL2/PTPMT1/PDCD10/HTRA2/STK25/MSH6/PARK7/HDAC1/SFPQ/TXNDC12/HELLS/PLAGL2/TRAP1/MYBBP1A/FIGNL1/EIF5A/UBQLN1/MYC/BRCA2/CUL4A/SOD1/PARP1/NONO/RPS3/HYOU1/AIFM1/HNRNPK/MELK/DDIAS/VDAC2/BAG5/ING2/HINT1/TRIAP1/RPS7/ZNF622/ATAD5/AEN/CHEK2/NOC2L/PPIA/PTPN1/OPA1/BAG6/NDUFS3/PRKDC/TAF9	58
BP	GO:0016445	somatic diversification of immunoglobulins	21/2099	69/18800	1.2129e-05	0.000135587	0.000112971	POLQ/TCF3/UNG/RIF1/MSH2/YY1/EXOSC3/SUPT6H/NSD2/RNF8/MSH6/MAD2L2/PMS2/CTNNBL1/HSPD1/XRCC4/PAXIP1/EXO1/ATAD5/HMCES/PRKDC	21
BP	GO:0032042	mitochondrial DNA metabolic process	11/2099	23/18800	1.23001e-05	0.000136572	0.000113792	DNAJA3/SSBP1/TWNK/MGME1/DNA2/POLG/PARP1/STOML2/RRM1/TOP3A/LONP1	11
BP	GO:0045048	protein insertion into ER membrane	11/2099	23/18800	1.23001e-05	0.000136572	0.000113792	EMC9/UBL4A/SGTA/CCDC47/EMC1/EMC4/EMC8/CAMLG/MMGT1/GET3/BAG6	11
BP	GO:0048026	positive regulation of mRNA splicing, via spliceosome	11/2099	23/18800	1.23001e-05	0.000136572	0.000113792	THRAP3/DAZAP1/SNW1/HSPA8/PRPF19/NUP98/NCL/PRDX6/TRA2B/NCBP1/RBMX	11
BP	GO:0022904	respiratory electron transport chain	29/2099	113/18800	1.26783e-05	0.000140456	0.000117028	NDUFAB1/SLC25A13/NDUFS1/DLD/CHCHD2/COX7A2L/PARK7/SDHB/MYBBP1A/CCNB1/NDUFB5/SDHC/NDUFB9/NDUFS2/NDUFB6/GHITM/NDUFV1/UQCRFS1/CDK1/CYCS/UQCRH/SLC25A22/COX5A/CYC1/NDUFA12/NDUFA6/NDUFA4/UQCC3/NDUFS3	29
BP	GO:0018393	internal peptidyl-lysine acetylation	39/2099	173/18800	1.32022e-05	0.000145934	0.000121592	MED24/BRCA1/PHF20/TAF2/ATXN7L3/SMARCB1/MRGBP/PIH1D1/TAF6/PARK7/SET/ENY2/NAA50/GTF3C4/YEATS4/HAT1/TAF4/TAF5L/ACTL6A/BRCA2/KANSL2/POLE3/TAF5/KAT14/CHEK1/PAXIP1/TAF6L/YEATS2/BRD7/HCFC1/RUVBL1/BEND3/TAF7/RUVBL2/MCRS1/NOC2L/WDR5/BAG6/TAF9	39
BP	GO:0016573	histone acetylation	38/2099	167/18800	1.35255e-05	0.00014914	0.000124263	MED24/BRCA1/PHF20/TAF2/ATXN7L3/SMARCB1/MRGBP/PIH1D1/TAF6/PARK7/SET/ENY2/NAA50/GTF3C4/YEATS4/HAT1/TAF4/TAF5L/ACTL6A/BRCA2/KANSL2/POLE3/TAF5/KAT14/CHEK1/PAXIP1/TAF6L/YEATS2/BRD7/HCFC1/RUVBL1/BEND3/TAF7/RUVBL2/MCRS1/NOC2L/WDR5/TAF9	38
BP	GO:0002200	somatic diversification of immune receptors	23/2099	80/18800	1.35527e-05	0.00014914	0.000124263	POLQ/TCF3/UNG/RIF1/MSH2/YY1/EXOSC3/SUPT6H/NSD2/RNF8/MSH6/MAD2L2/PMS2/CTNNBL1/HSPD1/XRCC4/PAXIP1/HMGB2/EXO1/ATAD5/HMCES/HMGB1/PRKDC	23
BP	GO:0032465	regulation of cytokinesis	25/2099	91/18800	1.39579e-05	0.000153258	0.000127694	POLDIP2/AURKA/CDC6/CDC25B/KIF3B/FSD1/GIT1/KIF20A/ECT2/KIF14/CIT/KIF23/KIF20B/BRCA2/PLK4/CALM2/AHCTF1/RACGAP1/ENTR1/E2F7/PLK1/AURKB/PRPF40A/NUP62/MYO19	25
BP	GO:0032434	regulation of proteasomal ubiquitin-dependent protein catabolic process	33/2099	137/18800	1.41055e-05	0.000154535	0.000128759	KEAP1/XPO1/AURKA/HSP90AB1/DESI1/TRIB3/USP14/PSMD10/AXIN1/SGTA/FZR1/USP5/SUMO1/PARK7/UCHL5/CDC20/HSPBP1/UBQLN1/BBS7/TLK2/EIF3H/UBQLN4/CAMLG/VCP/BAG5/PLK1/PBK/GLMN/RAD23A/SUMO2/DDRGK1/BAG6/TAF9	33
BP	GO:0016074	sno(s)RNA metabolic process	9/2099	16/18800	1.45536e-05	0.000158042	0.000131681	EXOSC5/FBL/EXOSC3/TENT4B/EXOSC2/DKC1/NOLC1/EXOSC10/EXOSC4	9
BP	GO:0042407	cristae formation	9/2099	16/18800	1.45536e-05	0.000158042	0.000131681	DNAJC11/SAMM50/CHCHD3/IMMT/AFG3L2/CHCHD6/LETM1/APOO/UQCC3	9
BP	GO:1902101	positive regulation of metaphase/anaphase transition of cell cycle	9/2099	16/18800	1.45536e-05	0.000158042	0.000131681	CDC27/ANAPC5/CDC23/MAD2L1BP/DLGAP5/ESPL1/NSMCE2/CDT1/ANAPC7	9
BP	GO:2000232	regulation of rRNA processing	9/2099	16/18800	1.45536e-05	0.000158042	0.000131681	USP36/RIOK2/BUD23/DIMT1/WDR75/HEATR1/RIOK1/WDR43/UTP15	9
BP	GO:0071479	cellular response to ionizing radiation	22/2099	75/18800	1.46009e-05	0.000158209	0.000131819	KDM1A/BRCA1/HSPA5/RAD51/XRCC5/EEF1D/RAD51AP1/RAD1/ECT2/ELK1/FIGNL1/BRCA2/INTS7/TLK2/RHNO1/CHEK2/HSF1/BRCC3/KDM4D/H2AX/XRCC6/BLM	22
BP	GO:0000910	cytokinesis	39/2099	174/18800	1.5211e-05	0.000164458	0.000137027	POLDIP2/ANLN/AURKA/KIF4A/CDC6/CDC25B/KIF3B/CHMP4B/FSD1/GIT1/RAB35/KIF20A/ECT2/CENPA/KIF14/CIT/STAMBP/ESPL1/CKAP2/DCTN3/KIF23/CEP55/KIF20B/BRCA2/PLK4/CALM2/INCENP/AHCTF1/ALKBH4/RACGAP1/WASHC5/ENTR1/E2F7/PLK1/CNTROB/AURKB/PRPF40A/NUP62/MYO19	39
BP	GO:0010569	regulation of double-strand break repair via homologous recombination	21/2099	70/18800	1.552e-05	0.000167068	0.000139201	KDM1A/RAD51/POLQ/RIF1/FUS/MRGBP/RAD51AP1/TIMELESS/MAD2L2/YEATS4/FIGNL1/ACTL6A/WRAP53/PARP1/CHEK1/MMS19/UBQLN4/RUVBL1/FANCB/RUVBL2/PARPBP	21
BP	GO:0045911	positive regulation of DNA recombination	21/2099	70/18800	1.552e-05	0.000167068	0.000139201	RIF1/FUS/MSH2/MRGBP/ERCC2/EXOSC3/NSD2/RAD51AP1/TIMELESS/MAD2L2/YEATS4/ACTL6A/WRAP53/PARP1/MMS19/PAXIP1/RUVBL1/ATAD5/FANCB/RUVBL2/HMCES	21
BP	GO:0016579	protein deubiquitination	36/2099	156/18800	1.62693e-05	0.000174753	0.000145605	USP36/USP13/TAF2/SART3/ITCH/ATXN7L3/USP14/USP10/TAF6/USP42/USP5/PSMD14/PARK7/UCHL5/ENY2/COPS5/STAMBP/TAF4/TAF5L/TAF5/OTUD6B/SPATA2/TAF6L/USP1/VCP/OTUB1/USP39/SF3B5/CDK1/ASXL1/EIF3F/TAF7/SHMT2/BRCC3/SF3B3/TAF9	36
BP	GO:1901796	regulation of signal transduction by p53 class mediator	27/2099	103/18800	1.64698e-05	0.000176523	0.000147079	KDM1A/AURKA/MAPKAPK5/PRMT5/PSMD10/PAK1IP1/RPL5/EIF5A/URB2/MYC/COPS3/CHEK1/HNRNPK/ING2/TRIAP1/RPS7/TP53RK/ATAD5/AURKB/RRS1/CHEK2/KMT5A/RPF2/MTOR/PRMT6/BOP1/TAF9	27
BP	GO:0042773	ATP synthesis coupled electron transport	25/2099	92/18800	1.71555e-05	0.000183079	0.000152541	NDUFAB1/NDUFS1/DLD/CHCHD2/COX7A2L/PARK7/CCNB1/NDUFB5/SDHC/NDUFB9/NDUFS2/NDUFB6/GHITM/NDUFV1/UQCRFS1/CDK1/CYCS/UQCRH/COX5A/CYC1/NDUFA12/NDUFA6/NDUFA4/UQCC3/NDUFS3	25
BP	GO:0042775	mitochondrial ATP synthesis coupled electron transport	25/2099	92/18800	1.71555e-05	0.000183079	0.000152541	NDUFAB1/NDUFS1/DLD/CHCHD2/COX7A2L/PARK7/CCNB1/NDUFB5/SDHC/NDUFB9/NDUFS2/NDUFB6/GHITM/NDUFV1/UQCRFS1/CDK1/CYCS/UQCRH/COX5A/CYC1/NDUFA12/NDUFA6/NDUFA4/UQCC3/NDUFS3	25
BP	GO:0006475	internal protein amino acid acetylation	39/2099	175/18800	1.74967e-05	0.000186317	0.000155239	MED24/BRCA1/PHF20/TAF2/ATXN7L3/SMARCB1/MRGBP/PIH1D1/TAF6/PARK7/SET/ENY2/NAA50/GTF3C4/YEATS4/HAT1/TAF4/TAF5L/ACTL6A/BRCA2/KANSL2/POLE3/TAF5/KAT14/CHEK1/PAXIP1/TAF6L/YEATS2/BRD7/HCFC1/RUVBL1/BEND3/TAF7/RUVBL2/MCRS1/NOC2L/WDR5/BAG6/TAF9	39
BP	GO:0032479	regulation of type I interferon production	26/2099	98/18800	1.86478e-05	0.000197723	0.000164743	DHX33/POLR3B/UFD1/ITCH/HSP90AA1/YY1/POLA1/PQBP1/GAPDH/POLR3G/POLR3F/DHX9/HSPD1/G3BP1/POLR3A/TOMM70/HMGB2/POLR3D/RNF26/BANF1/NPLOC4/TRAIP/IRAK1/POLR3C/GPATCH3/CHUK	26
BP	GO:0032606	type I interferon production	26/2099	98/18800	1.86478e-05	0.000197723	0.000164743	DHX33/POLR3B/UFD1/ITCH/HSP90AA1/YY1/POLA1/PQBP1/GAPDH/POLR3G/POLR3F/DHX9/HSPD1/G3BP1/POLR3A/TOMM70/HMGB2/POLR3D/RNF26/BANF1/NPLOC4/TRAIP/IRAK1/POLR3C/GPATCH3/CHUK	26
BP	GO:0030150	protein import into mitochondrial matrix	10/2099	20/18800	1.8887e-05	0.000198102	0.000165059	TIMM21/TIMM44/TIMM50/GRPEL1/TOMM40/TIMM17A/TOMM70/GRPEL2/TOMM20/TIMM23	10
BP	GO:0032211	negative regulation of telomere maintenance via telomerase	10/2099	20/18800	1.8887e-05	0.000198102	0.000165059	HNRNPC/TENT4B/GNL3L/NAT10/HNRNPA1/PIF1/TERF1/HNRNPU/EXOSC10/PINX1	10
BP	GO:0046931	pore complex assembly	10/2099	20/18800	1.8887e-05	0.000198102	0.000165059	NDC1/NUP93/NUP98/NUP107/PDZD11/NUP153/AHCTF1/NUP205/CCT8/CCT3	10
BP	GO:0000492	box C/D snoRNP assembly	7/2099	10/18800	1.89241e-05	0.000198102	0.000165059	NUFIP1/SNU13/PIH1D1/RUVBL1/RUVBL2/ZNHIT3/TAF9	7
BP	GO:0006388	tRNA splicing, via endonucleolytic cleavage and ligation	7/2099	10/18800	1.89241e-05	0.000198102	0.000165059	DDX1/RTRAF/RTCB/TSEN34/CLP1/TSEN54/TSEN15	7
BP	GO:0033314	mitotic DNA replication checkpoint signaling	7/2099	10/18800	1.89241e-05	0.000198102	0.000165059	ORC1/CLSPN/CDC6/TICRR/RAD17/NAE1/TOPBP1	7
BP	GO:0051568	histone H3-K4 methylation	21/2099	71/18800	1.97407e-05	0.000206213	0.000171817	KDM1A/BRCA1/PHF20/SNW1/PIH1D1/MACROH2A1/RBBP5/DNMT1/MEN1/KANSL2/PAXIP1/DPY30/HCFC1/BEND3/MCRS1/WDR5/ZNF335/CTR9/PRMT6/NELFE/EHMT2	21
BP	GO:0031647	regulation of protein stability	58/2099	300/18800	2.02617e-05	0.000211209	0.000175979	ZNF207/USP36/USP13/ATP1B3/HSP90AA1/NDC80/AURKA/HSP90AB1/UBL4A/GTPBP4/HSPA8/PTGES3/GAPDH/PDCD10/CCT4/PDCL3/SUMO1/PARK7/UTP25/TCP1/TARDBP/RPL5/MCM8/NCLN/GNL3L/QRSL1/CDK7/CCT7/DERL1/APTX/HSPD1/CCT6A/GOLGA7/CCT5/CCT8/B4GALT5/LSS/TMEM183A/CCT3/NAA15/CAMLG/BAG5/CCT2/PLK1/HDAC3/RPS7/HCFC1/CALR/RAD23A/CHEK2/NF2/DDRGK1/BAG6/PHB2/DDOST/PRKDC/PINX1/TAF9	58
BP	GO:1904666	regulation of ubiquitin protein ligase activity	11/2099	24/18800	2.04172e-05	0.000212382	0.000176957	FZR1/UBE2S/FBXO5/MAD2L2/CDC20/MASTL/RPL5/MAD2L1/PLK1/RPS7/UBE2C	11
BP	GO:0033120	positive regulation of RNA splicing	14/2099	37/18800	2.25563e-05	0.00023414	0.000195085	THRAP3/U2AF2/DAZAP1/RBM22/SNW1/ZPR1/HSPA8/PRPF19/NUP98/NCL/PRDX6/TRA2B/NCBP1/RBMX	14
BP	GO:2000113	negative regulation of cellular macromolecule biosynthetic process	54/2099	275/18800	2.46289e-05	0.000255119	0.000212565	UPF1/YBX1/EXOSC5/EIF2AK1/CNOT3/KHSRP/PUS7/PCIF1/ACOT8/EIF3E/EXOSC3/GAPDH/FXR1/NCL/PAIP2/TARDBP/TENT4B/EXOSC9/AGO2/METTL16/FXR2/ILF3/EXOSC2/EIF2S1/SYNCRIP/CAPRIN1/DHX9/EPRS1/PNPT1/HNRNPD/EIF4A3/NT5C3B/POLR2D/CNOT9/CELF1/RPS3/YTHDF1/EIF4E/HNRNPU/LARP1/MALSU1/POLR2G/MRPL13/TYMS/SHMT1/CALR/SHMT2/CNOT10/EIF4EBP1/CNOT7/DHFR/EIF6/LSM14A/AATF	54
BP	GO:0018394	peptidyl-lysine acetylation	40/2099	184/18800	2.53346e-05	0.000261879	0.000218198	MED24/BRCA1/PHF20/TAF2/ATXN7L3/SMARCB1/MRGBP/PIH1D1/TAF6/PARK7/SET/ENY2/NAA50/GTF3C4/YEATS4/HAT1/TAF4/TAF5L/ACTL6A/BRCA2/KANSL2/POLE3/TAF5/KAT14/CHEK1/PAXIP1/TAF6L/YEATS2/BRD7/HCFC1/RUVBL1/BEND3/TAF7/RUVBL2/MCRS1/NOC2L/WDR5/HDAC2/BAG6/TAF9	40
BP	GO:0090503	RNA phosphodiester bond hydrolysis, exonucleolytic	15/2099	42/18800	2.58809e-05	0.000266968	0.000222438	ANGEL1/EXOSC5/EXD2/XRN2/EXOSC3/ERI3/CPSF3/EXOSC9/EXOSC2/TOE1/PNPT1/ISG20L2/EXOSC10/EXOSC4/CNOT7	15
BP	GO:0006415	translational termination	9/2099	17/18800	2.78551e-05	0.000284953	0.000237423	UPF1/OGFOD1/GSPT1/GLE1/ETF1/EIF5A/ABCE1/GFM2/MRPL58	9
BP	GO:0090231	regulation of spindle checkpoint	9/2099	17/18800	2.78551e-05	0.000284953	0.000237423	NDC80/ANAPC15/MAD2L1BP/PCID2/CCNB1/DYNC1LI1/MAD2L1/CDT1/GEN1	9
BP	GO:0090266	regulation of mitotic cell cycle spindle assembly checkpoint	9/2099	17/18800	2.78551e-05	0.000284953	0.000237423	NDC80/ANAPC15/MAD2L1BP/PCID2/CCNB1/DYNC1LI1/MAD2L1/CDT1/GEN1	9
BP	GO:1903504	regulation of mitotic spindle checkpoint	9/2099	17/18800	2.78551e-05	0.000284953	0.000237423	NDC80/ANAPC15/MAD2L1BP/PCID2/CCNB1/DYNC1LI1/MAD2L1/CDT1/GEN1	9
BP	GO:0009123	nucleoside monophosphate metabolic process	22/2099	78/18800	2.87846e-05	0.000293727	0.000244733	AK2/CAD/DHODH/UMPS/PAICS/PPAT/DUT/ATIC/UCK2/PRPS1/ADK/GART/GMPS/HPRT1/TK1/DTYMK/TYMS/SHMT1/IMPDH2/PFAS/UCKL1/PNP	22
BP	GO:0006220	pyrimidine nucleotide metabolic process	17/2099	52/18800	2.88317e-05	0.000293727	0.000244733	NTHL1/UNG/CAD/DHODH/UMPS/DUT/MBD4/TDG/UCK2/PRPS1/DTYMK/CTPS1/TYMS/SHMT1/DCTPP1/UCKL1/NME1	17
BP	GO:0007063	regulation of sister chromatid cohesion	10/2099	21/18800	3.24476e-05	0.000329207	0.000274295	DDX11/MACROH2A1/SFPQ/SLF1/ESPL1/CDCA5/NSMCE2/RAD21/FEN1/BUB1	10
BP	GO:0032986	protein-DNA complex disassembly	10/2099	21/18800	3.24476e-05	0.000329207	0.000274295	SMARCD1/SUPT16H/SMARCB1/GRWD1/SMARCD2/SET/SMARCA4/MYC/HMGA1/SSRP1	10
BP	GO:0033119	negative regulation of RNA splicing	11/2099	25/18800	3.27849e-05	0.000331947	0.000276578	PTBP1/U2AF2/C1QBP/SRSF9/SRSF7/HNRNPA2B1/RBMX/HNRNPK/RBM10/SRSF10/RNPS1	11
BP	GO:0034661	ncRNA catabolic process	15/2099	43/18800	3.56664e-05	0.000360384	0.000300272	ELAC2/NSUN2/MTREX/EXOSC5/POP1/DDX49/EXOSC3/TENT4B/EXOSC9/EXOSC2/MRPL44/PNPT1/EXOSC10/EXOSC4/SND1	15
BP	GO:0006264	mitochondrial DNA replication	8/2099	14/18800	3.84437e-05	0.000386078	0.00032168	DNAJA3/SSBP1/TWNK/MGME1/DNA2/POLG/STOML2/RRM1	8
BP	GO:0006287	base-excision repair, gap-filling	8/2099	14/18800	3.84437e-05	0.000386078	0.00032168	POLD1/APEX1/LIG1/PCNA/POLG/FEN1/POLE/PARG	8
BP	GO:0043144	sno(s)RNA processing	8/2099	14/18800	3.84437e-05	0.000386078	0.00032168	EXOSC5/FBL/EXOSC3/TENT4B/EXOSC2/DKC1/EXOSC10/EXOSC4	8
BP	GO:0009259	ribonucleotide metabolic process	69/2099	384/18800	4.30108e-05	0.000431067	0.000359165	AK2/SLC25A13/ELOVL5/GNAI3/COASY/ENO1/ACAT1/CAD/DLD/ACOT7/ACOT8/PGK1/DHODH/GPI/GCDH/OGDH/GIT1/PDHX/ATP5F1B/GAPDH/TPI1/HMGCR/UMPS/ATP5PB/DLST/PANK2/ITPA/PAICS/PPAT/ACSS2/ACLY/PDHA1/RAN/LDHA/MYC/ADCY3/ATIC/FOXK2/UCK2/PARP1/DLAT/ATP5F1A/PFKM/ATP5MC3/ADK/SLC35B2/PANK4/GART/ATP5MC1/GMPS/VCP/STOML2/ATP5F1C/HPRT1/HINT1/PGAM1/CTPS1/IMPDH2/PFAS/PRKAG1/FITM2/UCKL1/PNP/OPA1/UQCC3/HACD2/NME1/EIF6/ACACA	69
BP	GO:0016073	snRNA metabolic process	19/2099	64/18800	4.57636e-05	0.000457729	0.00038138	MTREX/EXOSC5/EXOSC3/EXOSC9/METTL16/EXOSC2/DKC1/TOE1/CDK7/INTS14/INTS12/INTS7/ZC3H8/NHP2/MEPCE/INTS1/EXOSC10/EXOSC4/INTS5	19
BP	GO:0000394	RNA splicing, via endonucleolytic cleavage and ligation	7/2099	11/18800	4.69982e-05	0.00046724	0.000389304	DDX1/RTRAF/RTCB/TSEN34/CLP1/TSEN54/TSEN15	7
BP	GO:0031055	chromatin remodeling at centromere	7/2099	11/18800	4.69982e-05	0.00046724	0.000389304	OIP5/HELLS/HJURP/NASP/MIS18A/CENPP/CENPW	7
BP	GO:0075522	IRES-dependent viral translational initiation	7/2099	11/18800	4.69982e-05	0.00046724	0.000389304	PTBP1/EIF3D/EIF3B/EIF3A/SSB/DENR/EIF3F	7
BP	GO:0051382	kinetochore assembly	9/2099	18/18800	5.01846e-05	0.000496918	0.000414032	CENPA/CENPF/CENPK/DLGAP5/CENPE/CENPH/CENPN/CENPX/CENPW	9
BP	GO:1905820	positive regulation of chromosome separation	9/2099	18/18800	5.01846e-05	0.000496918	0.000414032	CDC27/ANAPC5/CDC23/MAD2L1BP/DLGAP5/ESPL1/NSMCE2/CDT1/ANAPC7	9
BP	GO:0043486	histone exchange	10/2099	22/18800	5.35389e-05	0.00052702	0.000439113	PSME4/ACTR6/OIP5/RNF8/HJURP/NASP/ANP32E/MIS18A/CENPP/CENPW	10
BP	GO:0002562	somatic diversification of immune receptors via germline recombination within a single locus	20/2099	70/18800	5.35446e-05	0.00052702	0.000439113	TCF3/UNG/RIF1/MSH2/YY1/EXOSC3/SUPT6H/NSD2/RNF8/MSH6/MAD2L2/HSPD1/XRCC4/PAXIP1/HMGB2/EXO1/ATAD5/HMCES/HMGB1/PRKDC	20
BP	GO:0016444	somatic cell DNA recombination	20/2099	70/18800	5.35446e-05	0.00052702	0.000439113	TCF3/UNG/RIF1/MSH2/YY1/EXOSC3/SUPT6H/NSD2/RNF8/MSH6/MAD2L2/HSPD1/XRCC4/PAXIP1/HMGB2/EXO1/ATAD5/HMCES/HMGB1/PRKDC	20
BP	GO:0040001	establishment of mitotic spindle localization	13/2099	35/18800	5.54815e-05	0.000544998	0.000454092	PAFAH1B1/SPDL1/NDE1/NDC80/ZW10/KPNB1/CENPA/GPSM2/ESPL1/MAD2L1/PLK1/SAPCD2/DCTN1	13
BP	GO:2001242	regulation of intrinsic apoptotic signaling pathway	37/2099	171/18800	5.5644e-05	0.00054551	0.000454519	KDM1A/TMEM161A/ENO1/DNAJA1/PIAS4/PTPMT1/HTRA2/PARK7/HDAC1/SFPQ/TXNDC12/HELLS/PLAGL2/TRAP1/FIGNL1/EIF5A/UBQLN1/MYC/SOD1/PARP1/NONO/RPS3/HYOU1/HNRNPK/DDIAS/VDAC2/BAG5/ING2/TRIAP1/RPS7/ATAD5/NOC2L/PPIA/PTPN1/OPA1/NDUFS3/TAF9	37
BP	GO:0072521	purine-containing compound metabolic process	73/2099	416/18800	5.82123e-05	0.000569558	0.000474556	AK2/KDM1A/SLC25A13/ELOVL5/GNAI3/COASY/ENO1/ACAT1/DLD/ACOT7/MTHFD1/ACOT8/PGK1/GPI/GCDH/OGDH/NUDT1/GIT1/PDHX/ATP5F1B/GAPDH/TPI1/HMGCR/ATP5PB/DLST/AMD1/PANK2/ITPA/PAICS/PPAT/ACSS2/ACLY/PDHA1/RAN/LDHA/NUDT15/MYC/ADCY3/ATIC/PRPSAP2/FOXK2/PARP1/PRPS1/DLAT/ATP5F1A/PFKM/ATP5MC3/ADK/SLC35B2/PANK4/GART/ATP5MC1/PRPSAP1/GMPS/VCP/STOML2/ATP5F1C/HPRT1/HINT1/PGAM1/SHMT1/IMPDH2/PFAS/PRKAG1/SHMT2/FITM2/PNP/OPA1/U…	73
BP	GO:0034728	nucleosome organization	35/2099	159/18800	6.03405e-05	0.000589214	0.000490933	SMARCD1/PSME4/MCM2/ACTR6/SART3/SUPT16H/SMARCB1/OIP5/CHRAC1/ASF1B/GRWD1/SMARCD2/SUPT6H/RNF8/MACROH2A1/SET/HJURP/SMARCA4/NASP/ANP32B/HMGA1/ANP32E/POLE3/SSRP1/MIS18A/CHAF1B/HMGB2/CHAF1A/NPM1/NAP1L1/CENPP/H2AX/CENPW/DAXX/DNAJC9	35
BP	GO:0016447	somatic recombination of immunoglobulin gene segments	18/2099	60/18800	6.18061e-05	0.000602335	0.000501866	TCF3/UNG/RIF1/MSH2/YY1/EXOSC3/SUPT6H/NSD2/RNF8/MSH6/MAD2L2/HSPD1/XRCC4/PAXIP1/EXO1/ATAD5/HMCES/PRKDC	18
BP	GO:0045740	positive regulation of DNA replication	14/2099	40/18800	6.20252e-05	0.00060328	0.000502653	DBF4/CDC7/SSBP1/ATF1/PCNA/DHX9/DNA2/DBF4B/STOML2/E2F7/CDT1/CDK1/ATAD5/FAF1	14
BP	GO:2001021	negative regulation of response to DNA damage stimulus	22/2099	82/18800	6.64581e-05	0.000645126	0.00053752	KDM1A/POLQ/TMEM161A/XRCC1/RIF1/THOC5/PSMD10/FBXO5/MAD2L2/AUNIP/RPS3/UBQLN4/DDIAS/OTUB1/ING2/TRIAP1/ATAD5/FANCB/CHEK2/HSF1/PARPBP/TAF9	22
BP	GO:0000281	mitotic cytokinesis	20/2099	71/18800	6.68011e-05	0.000647185	0.000539234	POLDIP2/ANLN/KIF4A/CHMP4B/RAB35/KIF20A/ECT2/CENPA/CIT/STAMBP/ESPL1/CKAP2/KIF23/CEP55/KIF20B/INCENP/RACGAP1/PLK1/CNTROB/NUP62	20
BP	GO:0031109	microtubule polymerization or depolymerization	29/2099	123/18800	6.9173e-05	0.000668853	0.000557289	FKBP4/ZNF207/KIF2A/NDE1/TPX2/MAPRE1/GIT1/FBXO5/KIF18A/TUBG1/PSRC1/CKAP2/HAUS2/TUBGCP4/NEDD1/KATNB1/KIF2C/RPS3/CENPJ/CCSAP/SKA1/SKA3/CKAP5/CDK5R1/DRG1/KIF18B/KIF24/DCTN1/MZT1	29
BP	GO:1902373	negative regulation of mRNA catabolic process	19/2099	66/18800	7.29601e-05	0.000702721	0.000585507	THRAP3/YBX1/ELAVL1/FUS/HNRNPC/E2F1/TARDBP/TENT4B/METTL16/SYNCRIP/DHX9/HNRNPD/NBAS/HNRNPU/LARP1/HNRNPA0/RBM10/PKP3/HNRNPAB	19
BP	GO:1902808	positive regulation of cell cycle G1/S phase transition	19/2099	66/18800	7.29601e-05	0.000702721	0.000585507	PAF1/CDC6/APEX1/FAM83D/EZH2/EIF4G1/CPSF3/STIL/CUL4A/RPTOR/MEPCE/CENPJ/SASS6/RRM1/RRM2/MTBP/DDRGK1/TFDP1/PHB2	19
BP	GO:0000212	meiotic spindle organization	8/2099	15/18800	7.42993e-05	0.000711459	0.000592787	ASPM/NDC80/AURKA/FBXO5/TUBG1/ESPL1/CCNB2/WASHC5	8
BP	GO:0000722	telomere maintenance via recombination	8/2099	15/18800	7.42993e-05	0.000711459	0.000592787	RAD51/XRCC1/RAD51C/BRCA2/TPRKB/NSMCE2/SMC6/RAD51D	8
BP	GO:0071025	RNA surveillance	8/2099	15/18800	7.42993e-05	0.000711459	0.000592787	EXOSC5/EXOSC3/EXOSC9/PCID2/EXOSC2/SUPV3L1/EXOSC10/EXOSC4	8
BP	GO:0050779	RNA destabilization	24/2099	94/18800	7.52292e-05	0.00071897	0.000599046	UPF1/YBX1/EXOSC5/CNOT3/KHSRP/EXOSC3/TARDBP/TENT4B/EXOSC9/AGO2/METTL16/EXOSC2/SYNCRIP/DHX9/PNPT1/HNRNPD/NT5C3B/POLR2D/CELF1/YTHDF1/HNRNPU/ZC3H18/POLR2G/CNOT7	24
BP	GO:0051571	positive regulation of histone H3-K4 methylation	11/2099	27/18800	7.75648e-05	0.000737532	0.000614512	BRCA1/PHF20/SNW1/DNMT1/KANSL2/PAXIP1/HCFC1/MCRS1/WDR5/CTR9/NELFE	11
BP	GO:1904357	negative regulation of telomere maintenance via telomere lengthening	11/2099	27/18800	7.75648e-05	0.000737532	0.000614512	HNRNPC/TENT4B/GNL3L/NAT10/HNRNPA1/PIF1/PARP1/TERF1/HNRNPU/EXOSC10/PINX1	11
BP	GO:0017004	cytochrome complex assembly	13/2099	36/18800	7.80118e-05	0.000737532	0.000614512	HCCS/COX10/TIMM21/UQCC1/COA1/FASTKD3/TACO1/OXA1L/UQCRFS1/SLC25A33/COA4/UQCC3/C12orf73	13
BP	GO:0032435	negative regulation of proteasomal ubiquitin-dependent protein catabolic process	13/2099	36/18800	7.80118e-05	0.000737532	0.000614512	HSP90AB1/USP14/SGTA/PARK7/UCHL5/TLK2/EIF3H/CAMLG/BAG5/PBK/DDRGK1/BAG6/TAF9	13
BP	GO:0042789	mRNA transcription by RNA polymerase II	13/2099	36/18800	7.80118e-05	0.000737532	0.000614512	TAF2/TAF11/TAF6/SUPT6H/TBP/MED1/TAF4/AP3B1/NCBP1/TAF4B/TAF5/TAF7/TAF9	13
BP	GO:0019080	viral gene expression	25/2099	100/18800	7.80671e-05	0.000737532	0.000614512	PTBP1/TAF11/EDEM2/TFAP4/SMARCB1/EIF3L/EIF3D/SNW1/EIF3B/EIF3A/HDAC1/TARDBP/ZNF639/PRMT1/CANX/SMARCA4/EIF3G/DHX9/SSB/TARBP2/DENR/RRP1B/MGAT4B/PSMC3/EIF3F	25
BP	GO:0010332	response to gamma radiation	17/2099	56/18800	8.32889e-05	0.000785363	0.000654365	KDM1A/HSPA5/RAD51/XRCC5/ELK1/MEN1/MYC/BRCA2/PARP1/FANCD2/TLK2/CHEK2/HSF1/H2AX/XRCC6/XRCC2/PRKDC	17
BP	GO:0009299	mRNA transcription	14/2099	41/18800	8.4572e-05	0.000795944	0.00066318	TAF2/TAF11/TAF6/SUPT6H/TBP/MED1/TAF4/AP3B1/NCBP1/TAF4B/TAF5/TAF7/HSF1/TAF9	14
BP	GO:0031061	negative regulation of histone methylation	10/2099	23/18800	8.5261e-05	0.000800902	0.000667312	KDM1A/BRCA1/SMARCB1/PIH1D1/SUPT6H/MACROH2A1/DNMT1/KDM4D/WDR5/PRMT6	10
BP	GO:0000291	nuclear-transcribed mRNA catabolic process, exonucleolytic	9/2099	19/18800	8.59051e-05	0.000802376	0.00066854	EXOSC5/EXOSC3/EXOSC9/EXOSC2/NT5C3B/POLR2G/EXOSC4/CNOT7/SKIV2L	9
BP	GO:0006144	purine nucleobase metabolic process	9/2099	19/18800	8.59051e-05	0.000802376	0.00066854	KDM1A/PAICS/PPAT/PRPS1/GART/GMPS/HPRT1/SHMT1/SHMT2	9
BP	GO:0006337	nucleosome disassembly	9/2099	19/18800	8.59051e-05	0.000802376	0.00066854	SMARCD1/SUPT16H/SMARCB1/GRWD1/SMARCD2/SET/SMARCA4/HMGA1/SSRP1	9
BP	GO:0009199	ribonucleoside triphosphate metabolic process	23/2099	89/18800	8.62015e-05	0.000803626	0.000669581	SLC25A13/GNAI3/ENO1/CAD/ATP5F1B/ATP5PB/ITPA/RAN/MYC/UCK2/PARP1/ATP5F1A/ATP5MC3/ATP5MC1/VCP/STOML2/ATP5F1C/CTPS1/IMPDH2/UCKL1/OPA1/UQCC3/NME1	23
BP	GO:0010638	positive regulation of organelle organization	82/2099	487/18800	9.22211e-05	0.000858126	0.00071499	CDC27/SLC25A5/RALA/NCAPD2/DDX11/MRE11/SPAG5/XRCC5/AURKA/MAPKAPK5/ANAPC5/CDC23/MIEF1/MAPRE1/PDCD5/AKT2/SSBP1/GIT1/NCAPG/CAMKK2/RAD51AP1/MACROH2A1/SMC4/HTRA2/CCT4/WRAP73/PARK7/SFPQ/NEK2/TCP1/NCAPH/GPSM2/HNRNPA2B1/STIL/MAD2L1BP/DLGAP5/TRIM28/DNMT1/DKC1/SLF1/MORC2/PSRC1/ESPL1/HNRNPA1/CCT7/NMT1/SMC2/HNRNPD/NABP2/KATNB1/PLK4/HAX1/NAF1/G3BP1/CCT6A/RPS3/CCT5/CENPJ/CCT8/NSMCE2/SASS6/CCT3/RAD21/STOML2/ENTR…	82
BP	GO:0001824	blastocyst development	27/2099	113/18800	9.52371e-05	0.000884524	0.000736985	PSMC4/NLE1/PALB2/CNOT3/SMARCB1/CCNB1IP1/GINS1/ASF1B/SUPT6H/ZPR1/BYSL/SF3B6/MFN2/NEK2/EMG1/NASP/WDR74/TTLL4/ACTL6A/BRCA2/RPL7L1/NCAPG2/GINS4/CHEK1/RRM2/RRP7A/CTR9	27
BP	GO:0006221	pyrimidine nucleotide biosynthetic process	12/2099	32/18800	9.60889e-05	0.00088743	0.000739407	CAD/DHODH/UMPS/DUT/UCK2/PRPS1/DTYMK/CTPS1/TYMS/SHMT1/UCKL1/NME1	12
BP	GO:0045070	positive regulation of viral genome replication	12/2099	32/18800	9.60889e-05	0.00088743	0.000739407	SRPK1/VAPB/STAU1/TOP2A/TARBP2/LARP1/DDB1/PPID/PPIH/RAD23A/PPIA/CNOT7	12
BP	GO:0071168	protein localization to chromatin	12/2099	32/18800	9.60889e-05	0.00088743	0.000739407	MSH2/PIH1D1/EZH2/MACROH2A1/MCM8/CDCA5/LRWD1/RAD21/VCP/PLK1/ESCO2/RUVBL2	12
BP	GO:0031397	negative regulation of protein ubiquitination	22/2099	84/18800	9.83176e-05	0.000906319	0.000755145	U2AF2/DNAJA1/GTPBP4/FBXO5/PARK7/MAD2L2/CDC20/RPL5/GNL3L/PRR7/PLAA/RPS3/BUB1B/MAD2L1/CAMLG/BAG5/OTUB1/RPS7/GLMN/PRMT3/PPIA/PINX1	22
BP	GO:0034770	histone H4-K20 methylation	7/2099	12/18800	0.000101884	0.00093745	0.000781083	BRCA1/NSD2/SMYD5/PWP1/NSD1/BEND3/KMT5A	7
BP	GO:0061157	mRNA destabilization	23/2099	90/18800	0.000103715	0.000952516	0.000793637	UPF1/YBX1/EXOSC5/CNOT3/KHSRP/EXOSC3/TARDBP/TENT4B/EXOSC9/AGO2/METTL16/EXOSC2/SYNCRIP/DHX9/PNPT1/HNRNPD/NT5C3B/POLR2D/CELF1/YTHDF1/HNRNPU/POLR2G/CNOT7	23
BP	GO:0034249	negative regulation of cellular amide metabolic process	52/2099	276/18800	0.000106301	0.000974091	0.000811613	UPF1/YBX1/EXOSC5/EIF2AK1/CNOT3/KHSRP/PUS7/PCIF1/EIF3E/EXOSC3/GAPDH/FXR1/NCL/PAIP2/TARDBP/TENT4B/EXOSC9/AGO2/METTL16/FXR2/ILF3/EXOSC2/EIF2S1/SYNCRIP/CAPRIN1/DHX9/EPRS1/PNPT1/HNRNPD/EIF4A3/NT5C3B/POLR2D/CNOT9/CELF1/RPS3/YTHDF1/EIF4E/HNRNPU/LARP1/MALSU1/POLR2G/MRPL13/TYMS/SHMT1/CALR/SHMT2/CNOT10/EIF4EBP1/CNOT7/DHFR/EIF6/LSM14A	52
BP	GO:0032784	regulation of DNA-templated transcription, elongation	17/2099	57/18800	0.000106458	0.000974091	0.000811613	SUPT16H/THOC5/NELFCD/HTATSF1/AXIN1/EZH2/SUPT6H/RNF8/GTF2F1/HNRNPU/WDR43/LEO1/CDK12/ALYREF/SUPT5H/NELFE/HMGN1	17
BP	GO:0072528	pyrimidine-containing compound biosynthetic process	13/2099	37/18800	0.00010805	0.000985011	0.000820712	CAD/DHODH/UMPS/DUT/UCK2/PRPS1/DTYMK/CTPS1/TYMS/SHMT1/UCKL1/MTOR/NME1	13
BP	GO:2000279	negative regulation of DNA biosynthetic process	13/2099	37/18800	0.00010805	0.000985011	0.000820712	HNRNPC/DNAJC2/TENT4B/GNL3L/MEN1/NAT10/HNRNPA1/PIF1/TERF1/CHEK1/HNRNPU/EXOSC10/PINX1	13
BP	GO:2001243	negative regulation of intrinsic apoptotic signaling pathway	25/2099	102/18800	0.000110181	0.00100259	0.000835357	KDM1A/TMEM161A/ENO1/DNAJA1/HTRA2/PARK7/HDAC1/TXNDC12/HELLS/TRAP1/FIGNL1/NONO/HYOU1/DDIAS/VDAC2/BAG5/ING2/TRIAP1/ATAD5/NOC2L/PPIA/PTPN1/OPA1/NDUFS3/TAF9	25
BP	GO:0046605	regulation of centrosome cycle	16/2099	52/18800	0.000111929	0.00101662	0.000847051	BRCA1/WDR62/XPO1/AURKA/CHMP4B/CEP76/STIL/NAT10/PLK4/CENPJ/SASS6/CCNF/GEN1/NPM1/NUP62/RBM14	16
BP	GO:0006760	folic acid-containing compound metabolic process	11/2099	28/18800	0.000114915	0.00104182	0.000868048	MTHFD2/MTHFD1/MTHFD1L/GGH/ATIC/GART/SLC19A1/TYMS/SHMT1/SHMT2/DHFR	11
BP	GO:0009142	nucleoside triphosphate biosynthetic process	22/2099	85/18800	0.00011884	0.00107543	0.000896051	SLC25A13/ENO1/CAD/ATP5F1B/ATP5PB/MYC/UCK2/PARP1/ATP5F1A/ATP5MC3/ADK/ATP5MC1/VCP/STOML2/ATP5F1C/DTYMK/CTPS1/TYMS/IMPDH2/UCKL1/UQCC3/NME1	22
BP	GO:0009408	response to heat	26/2099	109/18800	0.000131088	0.0011841	0.000986596	EIF2B3/HSP90AA1/DNAJA1/HSP90AB1/RBBP7/DNAJA3/DNAJC2/YWHAE/EIF2B1/EIF2B4/HTRA2/SUMO1/EIF2B2/EIF2S1/SOD1/POLR2D/EIF2B5/HIKESHI/CLPB/VCP/DNAJC7/IRAK1/HSF1/HDAC2/MTOR/DAXX	26
BP	GO:0006266	DNA ligation	8/2099	16/18800	0.000134045	0.00120421	0.00100335	RAD51/XRCC1/LIG1/TOP2A/APTX/XRCC4/HMGB1/XRCC6	8
BP	GO:0009130	pyrimidine nucleoside monophosphate biosynthetic process	8/2099	16/18800	0.000134045	0.00120421	0.00100335	CAD/DHODH/UMPS/DUT/UCK2/TYMS/SHMT1/UCKL1	8
BP	GO:0099116	tRNA 5'-end processing	8/2099	16/18800	0.000134045	0.00120421	0.00100335	HSD17B10/POP1/POP4/RPP40/SSB/RPP30/POP7/TRMT10C	8
BP	GO:0032481	positive regulation of type I interferon production	17/2099	58/18800	0.000135091	0.0012114	0.00100934	DHX33/POLR3B/HSP90AA1/PQBP1/GAPDH/POLR3G/POLR3F/DHX9/HSPD1/G3BP1/POLR3A/TOMM70/HMGB2/POLR3D/IRAK1/POLR3C/CHUK	17
BP	GO:0009168	purine ribonucleoside monophosphate biosynthetic process	9/2099	20/18800	0.000140738	0.00125748	0.00104773	PAICS/PPAT/ATIC/ADK/GART/GMPS/HPRT1/IMPDH2/PFAS	9
BP	GO:0046653	tetrahydrofolate metabolic process	9/2099	20/18800	0.000140738	0.00125748	0.00104773	MTHFD2/MTHFD1/MTHFD1L/ATIC/GART/TYMS/SHMT1/SHMT2/DHFR	9
BP	GO:0072698	protein localization to microtubule cytoskeleton	16/2099	53/18800	0.000143871	0.00128315	0.00106912	NUDCD3/SPAG5/AURKA/MAPRE1/FAM83D/TTK/CEP72/WRAP73/STIL/CEP250/DIAPH1/KIF20B/HNRNPU/DCTN2/CHAMP1/NUP62	16
BP	GO:0009394	2'-deoxyribonucleotide metabolic process	14/2099	43/18800	0.000151694	0.00135049	0.00112523	NTHL1/UNG/DUT/MBD4/NUDT15/TDG/ADK/RRM1/DTYMK/RRM2/TYMS/SHMT1/DCTPP1/PNP	14
BP	GO:0009161	ribonucleoside monophosphate metabolic process	17/2099	59/18800	0.000170239	0.00151171	0.00125956	AK2/CAD/DHODH/UMPS/PAICS/PPAT/ATIC/UCK2/PRPS1/ADK/GART/GMPS/HPRT1/IMPDH2/PFAS/UCKL1/PNP	17
BP	GO:0006163	purine nucleotide metabolic process	68/2099	394/18800	0.000170415	0.00151171	0.00125956	AK2/SLC25A13/ELOVL5/GNAI3/COASY/ENO1/ACAT1/DLD/ACOT7/MTHFD1/ACOT8/PGK1/GPI/GCDH/OGDH/GIT1/PDHX/ATP5F1B/GAPDH/TPI1/HMGCR/ATP5PB/DLST/PANK2/ITPA/PAICS/PPAT/ACSS2/ACLY/PDHA1/RAN/LDHA/NUDT15/MYC/ADCY3/ATIC/PRPSAP2/FOXK2/PARP1/PRPS1/DLAT/ATP5F1A/PFKM/ATP5MC3/ADK/SLC35B2/PANK4/GART/ATP5MC1/PRPSAP1/GMPS/VCP/STOML2/ATP5F1C/HPRT1/HINT1/PGAM1/IMPDH2/PFAS/PRKAG1/FITM2/PNP/OPA1/UQCC3/HACD2/NME1/EIF6/ACACA	68
BP	GO:0031503	protein-containing complex localization	33/2099	155/18800	0.000188802	0.00167181	0.00139296	FKBP4/LSG1/RIOK2/NDC1/AP3D1/XPO1/SEH1L/BIRC5/IFT52/KIF3B/TTC26/NUP88/CEP72/SFPQ/SSX2IP/RAN/LTV1/TERF1/HNRNPU/IFT122/ABCE1/MIOS/WASHC5/RAB8A/GPHN/HASPIN/RRS1/RCC2/NPM1/NOP9/SDAD1/MZT1/EIF6	33
BP	GO:0045143	homologous chromosome segregation	18/2099	65/18800	0.000192985	0.00170274	0.00141873	MRE11/NDC1/TRIP13/CCNB1IP1/CCNE1/SGO1/PSMC3IP/ESPL1/BRIP1/FANCD2/TERF1/SGO2/PTTG1/RAD21/PLK1/CCNE2/EHMT2/BAG6	18
BP	GO:1903051	negative regulation of proteolysis involved in cellular protein catabolic process	18/2099	65/18800	0.000192985	0.00170274	0.00141873	HSP90AB1/CSNK2A1/USP14/SGTA/PDCL3/PARK7/UCHL5/RPL5/PSMF1/TLK2/EIF3H/CAMLG/BAG5/PBK/RPS7/DDRGK1/BAG6/TAF9	18
BP	GO:0072527	pyrimidine-containing compound metabolic process	21/2099	82/18800	0.00019749	0.00173939	0.00144926	NTHL1/UNG/CAD/ERH/DHODH/UMPS/SLC25A19/DUT/MBD4/TDG/UCK2/PRPS1/TK1/DTYMK/CTPS1/TYMS/SHMT1/DCTPP1/UCKL1/MTOR/NME1	21
BP	GO:0001833	inner cell mass cell proliferation	7/2099	13/18800	0.000199434	0.00174407	0.00145316	PALB2/GINS1/ZPR1/BRCA2/NCAPG2/GINS4/CHEK1	7
BP	GO:0016078	tRNA catabolic process	7/2099	13/18800	0.000199434	0.00174407	0.00145316	ELAC2/NSUN2/POP1/EXOSC3/EXOSC9/EXOSC2/EXOSC10	7
BP	GO:0071027	nuclear RNA surveillance	7/2099	13/18800	0.000199434	0.00174407	0.00145316	EXOSC5/EXOSC3/EXOSC9/PCID2/EXOSC2/EXOSC10/EXOSC4	7
BP	GO:0071028	nuclear mRNA surveillance	7/2099	13/18800	0.000199434	0.00174407	0.00145316	EXOSC5/EXOSC3/EXOSC9/PCID2/EXOSC2/EXOSC10/EXOSC4	7
BP	GO:0009262	deoxyribonucleotide metabolic process	14/2099	44/18800	0.000199821	0.00174438	0.00145342	NTHL1/UNG/DUT/MBD4/NUDT15/TDG/ADK/RRM1/DTYMK/RRM2/TYMS/SHMT1/DCTPP1/PNP	14
BP	GO:0061014	positive regulation of mRNA catabolic process	23/2099	94/18800	0.000209591	0.00182644	0.00152179	UPF1/YBX1/EXOSC5/CNOT3/KHSRP/EXOSC3/TARDBP/TENT4B/EXOSC9/AGO2/METTL16/EXOSC2/SYNCRIP/DHX9/PNPT1/HNRNPD/NT5C3B/POLR2D/CELF1/YTHDF1/HNRNPU/POLR2G/CNOT7	23
BP	GO:0061640	cytoskeleton-dependent cytokinesis	24/2099	100/18800	0.000211672	0.00184132	0.00153419	POLDIP2/ANLN/KIF4A/CHMP4B/RAB35/KIF20A/ECT2/CENPA/CIT/STAMBP/ESPL1/CKAP2/DCTN3/KIF23/CEP55/KIF20B/INCENP/ALKBH4/RACGAP1/WASHC5/PLK1/CNTROB/AURKB/NUP62	24
BP	GO:0032886	regulation of microtubule-based process	47/2099	249/18800	0.000212815	0.00184731	0.00153918	FKBP4/PAFAH1B1/BRCA1/TACC3/CFAP20/WDR62/SPAG5/XPO1/AURKA/TPX2/RAE1/MAPRE1/CHMP4B/CEP76/FSD1/GIT1/KIF18A/GPSM2/STIL/MKKS/DIAPH1/PSRC1/NAT10/CKAP2/BORA/KATNB1/PLK4/RPS3/CENPJ/HNRNPU/CCSAP/SKA1/SASS6/CCNF/KIF15/SKA3/BORCS5/PLK1/CKAP5/CDK5R1/GEN1/NPM1/DRG1/DYNC1H1/DCTN1/NUP62/RBM14	47
BP	GO:0046824	positive regulation of nucleocytoplasmic transport	17/2099	60/18800	0.000213108	0.00184731	0.00153918	RIOK2/IPO5/RBM22/HSP90AB1/EMD/YWHAE/ZPR1/CPSF6/ECT2/TARDBP/KHDRBS1/TRIM28/RAN/DHX9/ANP32B/CDK1/HDAC3	17
BP	GO:0032069	regulation of nuclease activity	9/2099	21/18800	0.000221956	0.00192064	0.00160028	DDX11/PCNA/TERF1/RPS3/DFFA/HMGB2/ABCE1/NPM1/HMGB1	9
BP	GO:1903363	negative regulation of cellular protein catabolic process	20/2099	77/18800	0.000226287	0.0019547	0.00162865	HSP90AB1/CSNK2A1/USP14/SGTA/RGP1/PDCL3/PARK7/UCHL5/RPL5/PSMF1/TLK2/EIF3H/ATP13A2/CAMLG/BAG5/PBK/RPS7/DDRGK1/BAG6/TAF9	20
BP	GO:0031573	mitotic intra-S DNA damage checkpoint signaling	8/2099	17/18800	0.000228436	0.00196981	0.00164125	MRE11/TIPIN/MSH2/MDC1/FANCD2/RAD17/EME1/CHEK2	8
BP	GO:0051653	spindle localization	16/2099	55/18800	0.00023221	0.00199886	0.00166545	PAFAH1B1/SPDL1/ASPM/NDE1/NDC80/ZW10/KPNB1/CENPA/GPSM2/LLGL1/ESPL1/MAD2L1/PLK1/SAPCD2/DYNC1H1/DCTN1	16
BP	GO:0000132	establishment of mitotic spindle orientation	11/2099	30/18800	0.0002366	0.00203312	0.00169399	PAFAH1B1/SPDL1/NDE1/NDC80/ZW10/CENPA/GPSM2/MAD2L1/PLK1/SAPCD2/DCTN1	11
BP	GO:0034605	cellular response to heat	18/2099	66/18800	0.000237994	0.00204154	0.00170101	HSP90AA1/HSP90AB1/RBBP7/DNAJC2/YWHAE/HTRA2/SUMO1/EIF2S1/POLR2D/HIKESHI/CLPB/VCP/DNAJC7/IRAK1/HSF1/HDAC2/MTOR/DAXX	18
BP	GO:0043648	dicarboxylic acid metabolic process	23/2099	95/18800	0.000247749	0.00212154	0.00176767	MDH1/ALDH18A1/MTHFD2/L2HGDH/FH/MTHFD1/IDH3B/ACOT8/OGDH/NIT2/SDHB/DLST/GOT1/MTHFD1L/ACLY/GRHPR/ATIC/MDH2/SLC19A1/SHMT1/SHMT2/SDHAF3/DHFR	23
BP	GO:0031062	positive regulation of histone methylation	15/2099	50/18800	0.000248736	0.00212263	0.00176858	PAF1/BRCA1/PHF20/RIF1/SNW1/SUV39H1/DNMT1/KANSL2/RNF20/PAXIP1/HCFC1/MCRS1/WDR5/CTR9/NELFE	15
BP	GO:0051293	establishment of spindle localization	15/2099	50/18800	0.000248736	0.00212263	0.00176858	PAFAH1B1/SPDL1/NDE1/NDC80/ZW10/KPNB1/CENPA/GPSM2/LLGL1/ESPL1/MAD2L1/PLK1/SAPCD2/DYNC1H1/DCTN1	15
BP	GO:0043966	histone H3 acetylation	19/2099	72/18800	0.000257862	0.00219462	0.00182856	BRCA1/TAF2/ATXN7L3/SMARCB1/PIH1D1/TAF6/ENY2/TAF4/TAF5L/BRCA2/POLE3/TAF5/KAT14/CHEK1/TAF6L/YEATS2/TAF7/WDR5/TAF9	19
BP	GO:0032205	negative regulation of telomere maintenance	12/2099	35/18800	0.00025806	0.00219462	0.00182856	XRCC1/HNRNPC/TENT4B/GNL3L/NAT10/HNRNPA1/PIF1/PARP1/TERF1/HNRNPU/EXOSC10/PINX1	12
BP	GO:0008631	intrinsic apoptotic signaling pathway in response to oxidative stress	14/2099	45/18800	0.000260538	0.00220809	0.00183978	PDCD10/HTRA2/STK25/PARK7/SFPQ/TRAP1/UBQLN1/SOD1/PARP1/NONO/MELK/BAG5/ZNF622/PPIA	14
BP	GO:0019692	deoxyribose phosphate metabolic process	14/2099	45/18800	0.000260538	0.00220809	0.00183978	NTHL1/UNG/DUT/MBD4/NUDT15/TDG/ADK/RRM1/DTYMK/RRM2/TYMS/SHMT1/DCTPP1/PNP	14
BP	GO:0000338	protein deneddylation	6/2099	10/18800	0.00027096	0.00228077	0.00190034	COPS5/COPS4/COPS3/COPS7B/COPS6/GPS1	6
BP	GO:0031125	rRNA 3'-end processing	6/2099	10/18800	0.00027096	0.00228077	0.00190034	EXOSC3/ERI3/EXOSC9/EXOSC2/EXOSC10/RPS21	6
BP	GO:0032070	regulation of deoxyribonuclease activity	6/2099	10/18800	0.00027096	0.00228077	0.00190034	DDX11/PCNA/RPS3/DFFA/NPM1/HMGB1	6
BP	GO:0035999	tetrahydrofolate interconversion	6/2099	10/18800	0.00027096	0.00228077	0.00190034	MTHFD2/MTHFD1/MTHFD1L/TYMS/SHMT1/SHMT2	6
BP	GO:0031167	rRNA methylation	10/2099	26/18800	0.000288899	0.00242764	0.00202271	BUD23/DIMT1/FBL/FTSJ3/EMG1/METTL16/NSUN5/METTL5/TFB2M/TRMT61B	10
BP	GO:0009150	purine ribonucleotide metabolic process	63/2099	366/18800	0.000312271	0.00261958	0.00218263	AK2/SLC25A13/ELOVL5/GNAI3/COASY/ENO1/ACAT1/DLD/ACOT7/ACOT8/PGK1/GPI/GCDH/OGDH/GIT1/PDHX/ATP5F1B/GAPDH/TPI1/HMGCR/ATP5PB/DLST/PANK2/ITPA/PAICS/PPAT/ACSS2/ACLY/PDHA1/RAN/LDHA/MYC/ADCY3/ATIC/FOXK2/PARP1/DLAT/ATP5F1A/PFKM/ATP5MC3/ADK/SLC35B2/PANK4/GART/ATP5MC1/GMPS/VCP/STOML2/ATP5F1C/HPRT1/HINT1/PGAM1/IMPDH2/PFAS/PRKAG1/FITM2/PNP/OPA1/UQCC3/HACD2/NME1/EIF6/ACACA	63
BP	GO:0034472	snRNA 3'-end processing	11/2099	31/18800	0.000329984	0.00276348	0.00230253	EXOSC5/EXOSC3/EXOSC9/EXOSC2/TOE1/INTS14/INTS12/INTS7/INTS1/EXOSC4/INTS5	11
BP	GO:0009127	purine nucleoside monophosphate biosynthetic process	9/2099	22/18800	0.000338552	0.00282565	0.00235434	PAICS/PPAT/ATIC/ADK/GART/GMPS/HPRT1/IMPDH2/PFAS	9
BP	GO:0051444	negative regulation of ubiquitin-protein transferase activity	9/2099	22/18800	0.000338552	0.00282565	0.00235434	FBXO5/PARK7/MAD2L2/CDC20/RPL5/BUB1B/MAD2L1/BAG5/RPS7	9
BP	GO:0051294	establishment of spindle orientation	12/2099	36/18800	0.000348084	0.00290031	0.00241654	PAFAH1B1/SPDL1/NDE1/NDC80/ZW10/CENPA/GPSM2/LLGL1/MAD2L1/PLK1/SAPCD2/DCTN1	12
BP	GO:0006167	AMP biosynthetic process	7/2099	14/18800	0.000360424	0.00299303	0.00249379	PAICS/PPAT/ATIC/ADK/GART/HPRT1/PFAS	7
BP	GO:2000105	positive regulation of DNA-templated DNA replication	7/2099	14/18800	0.000360424	0.00299303	0.00249379	DBF4/CDC7/SSBP1/DBF4B/STOML2/E2F7/CDT1	7
BP	GO:0007131	reciprocal meiotic recombination	16/2099	57/18800	0.000364098	0.00300335	0.00250239	MRE11/RAD51/TRIP13/RAD54L/CCNB1IP1/RAD51C/RAD51AP1/PSMC3IP/TOP2A/BRIP1/FANCD2/EME1/RAD21/CENPX/RAD51D/FANCM	16
BP	GO:0044380	protein localization to cytoskeleton	16/2099	57/18800	0.000364098	0.00300335	0.00250239	NUDCD3/SPAG5/AURKA/MAPRE1/FAM83D/TTK/CEP72/WRAP73/STIL/CEP250/DIAPH1/KIF20B/HNRNPU/DCTN2/CHAMP1/NUP62	16
BP	GO:0048255	mRNA stabilization	16/2099	57/18800	0.000364098	0.00300335	0.00250239	THRAP3/YBX1/ELAVL1/FUS/HNRNPC/E2F1/TARDBP/TENT4B/METTL16/SYNCRIP/DHX9/HNRNPD/HNRNPU/LARP1/HNRNPA0/RBM10	16
BP	GO:0140527	reciprocal homologous recombination	16/2099	57/18800	0.000364098	0.00300335	0.00250239	MRE11/RAD51/TRIP13/RAD54L/CCNB1IP1/RAD51C/RAD51AP1/PSMC3IP/TOP2A/BRIP1/FANCD2/EME1/RAD21/CENPX/RAD51D/FANCM	16
BP	GO:0045945	positive regulation of transcription by RNA polymerase III	8/2099	18/18800	0.000371037	0.00305549	0.00254583	BAZ1B/CHD8/DEK/MYBBP1A/RPTOR/ZC3H8/DDX21/MTOR	8
BP	GO:0009201	ribonucleoside triphosphate biosynthetic process	19/2099	74/18800	0.000377157	0.00310072	0.00258352	SLC25A13/ENO1/CAD/ATP5F1B/ATP5PB/MYC/UCK2/PARP1/ATP5F1A/ATP5MC3/ATP5MC1/VCP/STOML2/ATP5F1C/CTPS1/IMPDH2/UCKL1/UQCC3/NME1	19
BP	GO:0010824	regulation of centrosome duplication	14/2099	47/18800	0.000430453	0.00353301	0.0029437	BRCA1/XPO1/CHMP4B/CEP76/STIL/NAT10/PLK4/CENPJ/SASS6/CCNF/GEN1/NPM1/NUP62/RBM14	14
BP	GO:0006611	protein export from nucleus	16/2099	58/18800	0.000451339	0.00369555	0.00307913	XPO1/RBM22/RANGAP1/DESI1/EMD/YWHAE/HSPA9/PARK7/CSE1L/XPO5/XPO7/RAN/NXT1/ANP32B/XPO6/CALR	16
BP	GO:0010165	response to X-ray	11/2099	32/18800	0.000452501	0.00369555	0.00307913	ERCC8/RAD51/KARS1/XRCC5/MSH2/BRCA2/XRCC4/BRCC3/XRCC6/XRCC2/BLM	11
BP	GO:0051443	positive regulation of ubiquitin-protein transferase activity	11/2099	32/18800	0.000452501	0.00369555	0.00307913	TRIB3/AXIN1/FZR1/UBE2S/CDC20/MASTL/DCUN1D5/PLK1/UBE2C/UBE2N/UBE2L3	11
BP	GO:0007099	centriole replication	13/2099	42/18800	0.000453616	0.00369854	0.00308162	BRCA1/WDR62/CEP76/CEP72/STIL/PLK4/CENPJ/SASS6/CNTROB/RTTN/NPM1/NUP62/RBM14	13
BP	GO:1905168	positive regulation of double-strand break repair via homologous recombination	12/2099	37/18800	0.0004633	0.00377128	0.00314223	FUS/MRGBP/RAD51AP1/TIMELESS/YEATS4/ACTL6A/WRAP53/PARP1/MMS19/RUVBL1/FANCB/RUVBL2	12
BP	GO:0009144	purine nucleoside triphosphate metabolic process	21/2099	87/18800	0.000472348	0.0038386	0.00319832	SLC25A13/GNAI3/ENO1/ATP5F1B/ATP5PB/ITPA/RAN/NUDT15/MYC/PARP1/ATP5F1A/ATP5MC3/ADK/ATP5MC1/VCP/STOML2/ATP5F1C/IMPDH2/OPA1/UQCC3/NME1	21
BP	GO:2001234	negative regulation of apoptotic signaling pathway	43/2099	230/18800	0.000476455	0.00386562	0.00322084	KDM1A/SLC25A5/MAPK8IP2/BRCA1/TMEM161A/GNAI3/NLE1/ENO1/DNAJA1/ZC3HC1/CSNK2A1/PSMD10/MAZ/PIH1D1/HTRA2/PARK7/HDAC1/TXNDC12/HELLS/TRAP1/PSME3/FIGNL1/NONO/HYOU1/HMGB2/DDIAS/VDAC2/GHITM/BAG5/PRDX2/ING2/PRELID1/TRIAP1/PELI3/ATAD5/FZD9/NOC2L/PPIA/PTPN1/OPA1/NDUFS3/TAF9/AATF	43
BP	GO:0042177	negative regulation of protein catabolic process	27/2099	124/18800	0.000479698	0.00388555	0.00323744	CYP51A1/HSP90AB1/CSNK2A1/USP14/SGTA/RGP1/HMGCR/PDCL3/PARK7/MAD2L2/UCHL5/RPL5/PSMF1/TLK2/SNX12/EIF3H/AZIN1/ATP13A2/MAD2L1/CAMLG/BAG5/PBK/RPS7/SF3B3/DDRGK1/BAG6/TAF9	27
BP	GO:0046599	regulation of centriole replication	9/2099	23/18800	0.000501383	0.00404793	0.00337273	BRCA1/CEP76/STIL/PLK4/CENPJ/SASS6/NPM1/NUP62/RBM14	9
BP	GO:0051131	chaperone-mediated protein complex assembly	9/2099	23/18800	0.000501383	0.00404793	0.00337273	HSP90AA1/HSP90AB1/PTGES3/MKKS/HSPD1/CCT2/HSPA4/PSMG1/LONP1	9
BP	GO:0090150	establishment of protein localization to membrane	47/2099	259/18800	0.000534396	0.00428735	0.00357222	AGK/HSPA5/HSP90AA1/TIMM13/TOMM22/MIEF1/SAMM50/TIMM9/SRP54/EMC9/CHMP4B/UBL4A/SGTA/PDCD5/AKT2/CCDC47/SSR3/TIMM8A/EMC1/EMC4/EMC8/SEC61G/AP3B1/TIMM10/ZDHHC4/NMT1/PEX5/TIMM29/ATG3/GOLGA7/PARD3/TIMM8B/TOMM70/OXA1L/MAIP1/CAMLG/RAB8A/YIF1B/SRP68/MMGT1/HSPA4/SRP72/CDK5R1/TIMM22/GET3/SYS1/BAG6	47
BP	GO:0006188	IMP biosynthetic process	6/2099	11/18800	0.000539715	0.00428735	0.00357222	PAICS/PPAT/ATIC/GART/HPRT1/PFAS	6
BP	GO:0006449	regulation of translational termination	6/2099	11/18800	0.000539715	0.00428735	0.00357222	UPF1/OGFOD1/GSPT1/GLE1/ETF1/EIF5A	6
BP	GO:0007135	meiosis II	6/2099	11/18800	0.000539715	0.00428735	0.00357222	RAD51C/MASTL/SGO1/BUB1B/SGO2/BUB1	6
BP	GO:0034427	nuclear-transcribed mRNA catabolic process, exonucleolytic, 3'-5'	6/2099	11/18800	0.000539715	0.00428735	0.00357222	EXOSC5/EXOSC3/EXOSC9/EXOSC2/EXOSC4/SKIV2L	6
BP	GO:0060623	regulation of chromosome condensation	6/2099	11/18800	0.000539715	0.00428735	0.00357222	BAZ1B/NCAPD2/NCAPG/SMC4/NCAPH/SMC2	6
BP	GO:0061983	meiosis II cell cycle process	6/2099	11/18800	0.000539715	0.00428735	0.00357222	RAD51C/MASTL/SGO1/BUB1B/SGO2/BUB1	6
BP	GO:0071044	histone mRNA catabolic process	6/2099	11/18800	0.000539715	0.00428735	0.00357222	UPF1/MTPAP/TENT4B/SSB/EXOSC10/EXOSC4	6
BP	GO:1904668	positive regulation of ubiquitin protein ligase activity	6/2099	11/18800	0.000539715	0.00428735	0.00357222	FZR1/UBE2S/CDC20/MASTL/PLK1/UBE2C	6
BP	GO:2000622	regulation of nuclear-transcribed mRNA catabolic process, nonsense-mediated decay	6/2099	11/18800	0.000539715	0.00428735	0.00357222	CASC3/EIF4A3/NBAS/MAGOH/HNRNPAB/RBM8A	6
BP	GO:0035825	homologous recombination	16/2099	59/18800	0.000555934	0.00440376	0.00366922	MRE11/RAD51/TRIP13/RAD54L/CCNB1IP1/RAD51C/RAD51AP1/PSMC3IP/TOP2A/BRIP1/FANCD2/EME1/RAD21/CENPX/RAD51D/FANCM	16
BP	GO:0034644	cellular response to UV	21/2099	88/18800	0.000556152	0.00440376	0.00366922	KDM1A/POLD1/TMEM161A/POLD3/YY1/ACTR5/PCNA/EIF2S1/MYC/PARP1/CHEK1/CDC25A/DDB1/PBK/TRIAP1/PPID/RHNO1/AURKB/NPM1/RUVBL2/NOC2L	21
BP	GO:0050821	protein stabilization	37/2099	191/18800	0.000573462	0.00453356	0.00377736	ZNF207/USP36/USP13/ATP1B3/HSP90AA1/HSP90AB1/GTPBP4/PTGES3/GAPDH/PDCD10/CCT4/PDCL3/SUMO1/PARK7/TCP1/RPL5/MCM8/NCLN/CDK7/CCT7/HSPD1/CCT6A/GOLGA7/CCT5/CCT8/CCT3/NAA15/CAMLG/BAG5/CCT2/RPS7/HCFC1/CALR/CHEK2/BAG6/PHB2/TAF9	37
BP	GO:0000729	DNA double-strand break processing	8/2099	19/18800	0.000578406	0.00456534	0.00380384	MRE11/EXD2/RNF138/BRIP1/DNA2/UBE2V2/UBE2N/BLM	8
BP	GO:0032388	positive regulation of intracellular transport	38/2099	198/18800	0.000587607	0.00463057	0.00385819	EIPR1/USP36/RIOK2/IPO5/SPAG5/RBM22/HUWE1/EDEM2/HSP90AB1/MIEF1/TM9SF4/EMD/ZFAND1/PDCD5/AKT2/YWHAE/ZPR1/CPSF6/PDCD10/ECT2/HTRA2/TARDBP/KHDRBS1/ERGIC3/TRIM28/RAN/DHX9/NMT1/ANP32B/KIF20B/SAE1/PCNT/BORCS5/CDK1/HDAC3/CDK5R1/UBE2L3/DYNC1H1	38
BP	GO:0031497	chromatin assembly	39/2099	205/18800	0.000599755	0.00471877	0.00393168	KDM1A/MCM2/SART3/RIF1/HIRA/SUV39H1/AXIN1/OIP5/CHRAC1/ASF1B/GRWD1/EZH2/MACROH2A1/HDAC1/SET/HELLS/CBX3/HJURP/HAT1/TRIM28/DNMT1/NASP/MORC2/ANP32B/POLE3/MIS18A/CHAF1B/HMGB2/CHAF1A/BEND3/NPM1/NAP1L1/CENPP/H2AX/NOC2L/CTR9/CENPW/DAXX/DNAJC9	39
BP	GO:0006620	post-translational protein targeting to endoplasmic reticulum membrane	7/2099	15/18800	0.000610783	0.00477589	0.00397927	HSPA5/CHMP4B/UBL4A/SGTA/SEC61G/GET3/BAG6	7
BP	GO:0007000	nucleolus organization	7/2099	15/18800	0.000610783	0.00477589	0.00397927	DDX11/USP36/SUV39H1/POLR1B/EMG1/NOLC1/BEND3	7
BP	GO:0051290	protein heterotetramerization	7/2099	15/18800	0.000610783	0.00477589	0.00397927	CPSF6/FARSB/CPSF7/NUDT21/RRM1/RRM2/FARSA	7
BP	GO:0006298	mismatch repair	11/2099	33/18800	0.000610881	0.00477589	0.00397927	POLD3/MSH2/LIG1/RPA3/MSH6/PMS2/RPA1/PCNA/TDG/EXO1/HMGB1	11
BP	GO:0033866	nucleoside bisphosphate biosynthetic process	16/2099	60/18800	0.000680599	0.00529581	0.00441247	ELOVL5/COASY/ACAT1/DLD/ACOT7/GCDH/PDHX/PANK2/ACSS2/ACLY/PDHA1/DLAT/SLC35B2/PANK4/HACD2/ACACA	16
BP	GO:0034030	ribonucleoside bisphosphate biosynthetic process	16/2099	60/18800	0.000680599	0.00529581	0.00441247	ELOVL5/COASY/ACAT1/DLD/ACOT7/GCDH/PDHX/PANK2/ACSS2/ACLY/PDHA1/DLAT/SLC35B2/PANK4/HACD2/ACACA	16
BP	GO:0034033	purine nucleoside bisphosphate biosynthetic process	16/2099	60/18800	0.000680599	0.00529581	0.00441247	ELOVL5/COASY/ACAT1/DLD/ACOT7/GCDH/PDHX/PANK2/ACSS2/ACLY/PDHA1/DLAT/SLC35B2/PANK4/HACD2/ACACA	16
BP	GO:0051302	regulation of cell division	36/2099	186/18800	0.000686713	0.00533498	0.00444511	POLDIP2/YBX1/ASPM/RBL1/AURKA/ORC6/CDC6/CDC25B/KIF3B/FSD1/GIT1/KIF20A/ECT2/KIF14/CIT/SMYD5/MYC/KIF23/KIF20B/BRCA2/PLK4/CALM2/KAT14/AHCTF1/RACGAP1/YEATS2/ENTR1/E2F7/PLK1/AURKB/KIF18B/WDR5/PRPF40A/BLM/NUP62/MYO19	36
BP	GO:1903321	negative regulation of protein modification by small protein conjugation or removal	22/2099	96/18800	0.000750391	0.00582054	0.00484968	U2AF2/DNAJA1/GTPBP4/FBXO5/PARK7/MAD2L2/CDC20/RPL5/GNL3L/PRR7/PLAA/RPS3/BUB1B/MAD2L1/CAMLG/BAG5/OTUB1/RPS7/GLMN/PRMT3/PPIA/PINX1	22
BP	GO:0006414	translational elongation	15/2099	55/18800	0.00076801	0.00594254	0.00495133	AARS1/ALKBH1/EEF1D/HBS1L/EEF1B2/DPH5/EEFSEC/EIF5A/DPH2/MRPL44/EIF4A3/EEF2/ZNF598/GFM1/TUFM	15
BP	GO:0019646	aerobic electron transport chain	20/2099	84/18800	0.000768525	0.00594254	0.00495133	NDUFAB1/NDUFS1/DLD/COX7A2L/PARK7/NDUFB5/SDHC/NDUFB9/NDUFS2/NDUFB6/NDUFV1/UQCRFS1/CYCS/UQCRH/COX5A/CYC1/NDUFA6/NDUFA4/UQCC3/NDUFS3	20
BP	GO:0010390	histone monoubiquitination	10/2099	29/18800	0.000795979	0.00613562	0.0051122	PAF1/ATXN7L3/KDM2B/PCGF1/RNF20/PCGF6/LEO1/DDB1/CTR9/UHRF1	10
BP	GO:1902175	regulation of oxidative stress-induced intrinsic apoptotic signaling pathway	10/2099	29/18800	0.000795979	0.00613562	0.0051122	HTRA2/PARK7/SFPQ/TRAP1/UBQLN1/SOD1/PARP1/NONO/BAG5/PPIA	10
BP	GO:0040029	regulation of gene expression, epigenetic	29/2099	141/18800	0.000810026	0.00623417	0.00519431	KDM1A/UPF1/BRCA1/SMARCD1/RIF1/SUV39H1/AXIN1/EZH2/MACROH2A1/HDAC1/HELLS/CBX3/TRIM28/DNMT1/MORC2/SMYD5/TDG/POLE3/CHEK1/HNRNPU/RBM15/RFWD3/EXOSC10/EIF1/GLMN/BEND3/SUZ12/ZNF335/CTR9	29
BP	GO:1904589	regulation of protein import	16/2099	61/18800	0.000828342	0.00636522	0.0053035	IPO5/RBM22/HSP90AB1/PDCD5/ZPR1/HSPA8/ECT2/SUMO1/TARDBP/TRIM28/RAN/NUP54/TOMM70/NOLC1/CDK1/HDAC3	16
BP	GO:0031058	positive regulation of histone modification	23/2099	103/18800	0.000844543	0.00647964	0.00539884	KDM1A/PAF1/BRCA1/PHF20/SART3/RIF1/SMARCB1/SNW1/SUV39H1/PIH1D1/DNMT1/KANSL2/RNF20/PAXIP1/BRD7/ING2/HCFC1/UBE2N/RUVBL2/MCRS1/WDR5/CTR9/NELFE	23
BP	GO:0031057	negative regulation of histone modification	14/2099	50/18800	0.000857154	0.00655604	0.00546249	KDM1A/BRCA1/SMARCB1/PIH1D1/SUPT6H/MACROH2A1/SET/DNMT1/OTUB1/TAF7/KDM4D/NOC2L/WDR5/PRMT6	14
BP	GO:1901799	negative regulation of proteasomal protein catabolic process	14/2099	50/18800	0.000857154	0.00655604	0.00546249	HSP90AB1/USP14/SGTA/PARK7/UCHL5/PSMF1/TLK2/EIF3H/CAMLG/BAG5/PBK/DDRGK1/BAG6/TAF9	14
BP	GO:1901800	positive regulation of proteasomal protein catabolic process	25/2099	116/18800	0.000892768	0.00681404	0.00567746	PSMC4/USP13/KEAP1/AURKA/PSMC6/PSMC1/TRIB3/PSMD10/AXIN1/SGTA/FZR1/USP5/SUMO1/CDC20/HSPBP1/UBQLN1/BBS7/PSMC2/VCP/PSMC3/PLK1/RAD23A/SUMO2/DDRGK1/BAG6	25
BP	GO:0043967	histone H4 acetylation	18/2099	73/18800	0.000893644	0.00681404	0.00567746	BRCA1/PHF20/SMARCB1/MRGBP/PIH1D1/NAA50/YEATS4/HAT1/ACTL6A/BRCA2/KANSL2/HCFC1/RUVBL1/BEND3/TAF7/RUVBL2/MCRS1/WDR5	18
BP	GO:0033182	regulation of histone ubiquitination	6/2099	12/18800	0.000977545	0.00733734	0.00611347	KDM1A/PARK7/RNF20/OTUB1/UBE2N/CTR9	6
BP	GO:0043248	proteasome assembly	6/2099	12/18800	0.000977545	0.00733734	0.00611347	PSMD10/PSMD11/ADRM1/POMP/OTUD6B/PSMG1	6
BP	GO:0044771	meiotic cell cycle phase transition	6/2099	12/18800	0.000977545	0.00733734	0.00611347	NDC80/CDC25B/TTK/CCNB2/CDC25C/CDC25A	6
BP	GO:0046831	regulation of RNA export from nucleus	6/2099	12/18800	0.000977545	0.00733734	0.00611347	NSUN2/SUPT6H/CPSF6/KHDRBS1/NUP153/DHX9	6
BP	GO:0051573	negative regulation of histone H3-K9 methylation	6/2099	12/18800	0.000977545	0.00733734	0.00611347	KDM1A/BRCA1/SMARCB1/PIH1D1/DNMT1/KDM4D	6
BP	GO:0070601	centromeric sister chromatid cohesion	6/2099	12/18800	0.000977545	0.00733734	0.00611347	NAA50/SGO1/BOD1/BUB1B/SGO2/BUB1	6
BP	GO:1900152	negative regulation of nuclear-transcribed mRNA catabolic process, deadenylation-dependent decay	6/2099	12/18800	0.000977545	0.00733734	0.00611347	YBX1/TENT4B/SYNCRIP/DHX9/HNRNPD/HNRNPU	6
BP	GO:0009200	deoxyribonucleoside triphosphate metabolic process	7/2099	16/18800	0.000981578	0.00733734	0.00611347	ITPA/DUT/NUDT15/ADK/DTYMK/TYMS/DCTPP1	7
BP	GO:0009263	deoxyribonucleotide biosynthetic process	7/2099	16/18800	0.000981578	0.00733734	0.00611347	DUT/ADK/RRM1/DTYMK/RRM2/TYMS/SHMT1	7
BP	GO:0009265	2'-deoxyribonucleotide biosynthetic process	7/2099	16/18800	0.000981578	0.00733734	0.00611347	DUT/ADK/RRM1/DTYMK/RRM2/TYMS/SHMT1	7
BP	GO:0046385	deoxyribose phosphate biosynthetic process	7/2099	16/18800	0.000981578	0.00733734	0.00611347	DUT/ADK/RRM1/DTYMK/RRM2/TYMS/SHMT1	7
BP	GO:0070071	proton-transporting two-sector ATPase complex assembly	7/2099	16/18800	0.000981578	0.00733734	0.00611347	TM9SF4/TMEM9/ATPAF1/OXA1L/VMA21/TMEM70/TMEM199	7
BP	GO:0097428	protein maturation by iron-sulfur cluster transfer	7/2099	16/18800	0.000981578	0.00733734	0.00611347	GLRX3/CIAO1/MMS19/CIAO2A/NFU1/GLRX5/YAE1	7
BP	GO:0000244	spliceosomal tri-snRNP complex assembly	9/2099	25/18800	0.00101904	0.00758296	0.00631813	DDX20/SART3/PRPF6/PRPF31/PRPF19/AAR2/PRPF8/SRSF10/LSM2	9
BP	GO:0009147	pyrimidine nucleoside triphosphate metabolic process	9/2099	25/18800	0.00101904	0.00758296	0.00631813	CAD/DUT/UCK2/DTYMK/CTPS1/TYMS/DCTPP1/UCKL1/NME1	9
BP	GO:0009219	pyrimidine deoxyribonucleotide metabolic process	9/2099	25/18800	0.00101904	0.00758296	0.00631813	NTHL1/UNG/DUT/MBD4/TDG/DTYMK/TYMS/SHMT1/DCTPP1	9
BP	GO:0042558	pteridine-containing compound metabolic process	11/2099	35/18800	0.00106711	0.00792873	0.00660622	MTHFD2/MTHFD1/MTHFD1L/GGH/ATIC/GART/SLC19A1/TYMS/SHMT1/SHMT2/DHFR	11
BP	GO:0032386	regulation of intracellular transport	56/2099	332/18800	0.00107068	0.00794331	0.00661837	EIPR1/NSUN2/USP36/RIOK2/IPO5/SPAG5/XPO1/RBM22/HUWE1/EDEM2/AAAS/HSP90AB1/MIEF1/RANGAP1/TM9SF4/EMD/ZFAND1/PDCD5/AKT2/YWHAE/SUPT6H/ZPR1/CPSF6/PDCD10/ECT2/HTRA2/SUMO1/PARK7/TARDBP/KHDRBS1/NUP153/ERGIC3/TRIM28/RAN/RINT1/DHX9/NMT1/ANP32B/PREB/KIF20B/NUP54/SAE1/HAX1/SNX12/ATP13A2/PCNT/BORCS5/NOLC1/MAP2K1/CDK1/HDAC3/CDK5R1/UBE2L3/PPP1CC/PTPN1/DYNC1H1	56
BP	GO:0071480	cellular response to gamma radiation	10/2099	30/18800	0.00107567	0.00796834	0.00663922	KDM1A/HSPA5/RAD51/XRCC5/ELK1/TLK2/CHEK2/HSF1/H2AX/XRCC6	10
BP	GO:0051099	positive regulation of binding	33/2099	171/18800	0.00118083	0.00872803	0.00727219	POLDIP2/KDM1A/DDX11/HSP90AB1/EIF3D/TRIB3/MAPRE1/EIF3E/ERCC2/GMNN/PPP2CA/EIF4G1/PARK7/TRIM28/RAN/MEN1/EIF2S1/DHX9/NCBP1/DERL1/MYC/NVL/PARP1/CALM2/HMGB2/CDT1/EIF3C/HSF1/KDM4D/HMGB1/DDRGK1/NME1/PINX1	33
BP	GO:0098534	centriole assembly	13/2099	46/18800	0.00118175	0.00872803	0.00727219	BRCA1/WDR62/CEP76/CEP72/STIL/PLK4/CENPJ/SASS6/CNTROB/RTTN/NPM1/NUP62/RBM14	13
BP	GO:0000288	nuclear-transcribed mRNA catabolic process, deadenylation-dependent decay	16/2099	63/18800	0.00120667	0.00889872	0.00741442	YBX1/EXOSC5/CNOT3/EXOSC3/TENT4B/EXOSC9/AGO2/EXOSC2/SYNCRIP/DHX9/HNRNPD/NT5C3B/POLR2D/HNRNPU/POLR2G/CNOT7	16
BP	GO:0001832	blastocyst growth	8/2099	21/18800	0.00126909	0.00930355	0.00775172	PALB2/GINS1/ZPR1/BRCA2/NCAPG2/GINS4/CHEK1/CTR9	8
BP	GO:0006353	DNA-templated transcription, termination	8/2099	21/18800	0.00126909	0.00930355	0.00775172	XRN2/PRMT5/MAZ/TTF2/MTERF1/DHX9/SSU72/POLR3K	8
BP	GO:0007549	dosage compensation	8/2099	21/18800	0.00126909	0.00930355	0.00775172	UPF1/BRCA1/MACROH2A1/HNRNPU/RBM15/EXOSC10/EIF1/SUZ12	8
BP	GO:0016075	rRNA catabolic process	8/2099	21/18800	0.00126909	0.00930355	0.00775172	EXOSC5/DDX49/EXOSC3/EXOSC9/EXOSC2/MRPL44/EXOSC10/EXOSC4	8
BP	GO:0034243	regulation of transcription elongation from RNA polymerase II promoter	12/2099	41/18800	0.00129356	0.00946888	0.00788947	SUPT16H/NELFCD/AXIN1/EZH2/SUPT6H/RNF8/GTF2F1/HNRNPU/WDR43/LEO1/CDK12/NELFE	12
BP	GO:0002204	somatic recombination of immunoglobulin genes involved in immune response	14/2099	52/18800	0.00130584	0.00951646	0.00792911	UNG/RIF1/MSH2/EXOSC3/SUPT6H/NSD2/RNF8/MSH6/MAD2L2/HSPD1/PAXIP1/EXO1/ATAD5/HMCES	14
BP	GO:0002208	somatic diversification of immunoglobulins involved in immune response	14/2099	52/18800	0.00130584	0.00951646	0.00792911	UNG/RIF1/MSH2/EXOSC3/SUPT6H/NSD2/RNF8/MSH6/MAD2L2/HSPD1/PAXIP1/EXO1/ATAD5/HMCES	14
BP	GO:0045190	isotype switching	14/2099	52/18800	0.00130584	0.00951646	0.00792911	UNG/RIF1/MSH2/EXOSC3/SUPT6H/NSD2/RNF8/MSH6/MAD2L2/HSPD1/PAXIP1/EXO1/ATAD5/HMCES	14
BP	GO:0006304	DNA modification	25/2099	119/18800	0.00131173	0.00954531	0.00795315	BRCA1/NTHL1/UNG/EXOSC5/PRMT5/ALKBH1/APEX1/EZH2/EXOSC3/NEIL3/HELLS/MBD4/PARP2/TRIM28/DNMT1/MYC/TDG/PARP1/MTA2/MIS18A/ALKBH4/GATAD2A/BEND3/EXOSC4/EHMT2	25
BP	GO:0007020	microtubule nucleation	11/2099	36/18800	0.00138349	0.0100379	0.00836357	NDE1/TPX2/GIT1/TUBG1/HAUS2/TUBGCP4/NEDD1/CENPJ/CKAP5/DCTN1/MZT1	11
BP	GO:0016180	snRNA processing	11/2099	36/18800	0.00138349	0.0100379	0.00836357	EXOSC5/EXOSC3/EXOSC9/EXOSC2/TOE1/INTS14/INTS12/INTS7/INTS1/EXOSC4/INTS5	11
BP	GO:0046037	GMP metabolic process	9/2099	26/18800	0.00140559	0.0101833	0.00848473	PAICS/PPAT/ATIC/ADK/GART/GMPS/HPRT1/IMPDH2/PFAS	9
BP	GO:0006506	GPI anchor biosynthetic process	10/2099	31/18800	0.00143076	0.0103505	0.00862401	DPM1/PIGS/PIGH/PIGU/PIGT/PGAP2/PIGX/PIGO/GPAA1/PIGW	10
BP	GO:0009205	purine ribonucleoside triphosphate metabolic process	19/2099	82/18800	0.00145482	0.0105092	0.00875625	SLC25A13/GNAI3/ENO1/ATP5F1B/ATP5PB/ITPA/RAN/MYC/PARP1/ATP5F1A/ATP5MC3/ATP5MC1/VCP/STOML2/ATP5F1C/IMPDH2/OPA1/UQCC3/NME1	19
BP	GO:0043923	positive regulation by host of viral transcription	7/2099	17/18800	0.00150878	0.0108672	0.00905452	TAF11/TFAP4/SMARCB1/SNW1/ZNF639/SMARCA4/RRP1B	7
BP	GO:0060382	regulation of DNA strand elongation	7/2099	17/18800	0.00150878	0.0108672	0.00905452	YY1/ACTR5/UCHL5/ACTL6A/RUVBL1/RUVBL2/MCRS1	7
BP	GO:0031331	positive regulation of cellular catabolic process	71/2099	449/18800	0.00156646	0.0112571	0.00937941	UPF1/SLC25A5/PSMC4/USP13/GNAI3/YBX1/EXOSC5/NRDC/ITCH/KEAP1/HSP90AA1/AURKA/CNOT3/KHSRP/PSMC6/PSMC1/TRIB3/PSMD10/CCDC22/AXIN1/SGTA/AKT2/FZR1/EXOSC3/CAMKK2/USP5/SUMO1/PARK7/CDC20/TARDBP/TENT4B/EXOSC9/AGO2/METTL16/EXOSC2/HSPBP1/UBQLN1/SYNCRIP/DHX9/MYC/PNPT1/HNRNPD/BBS7/TRIM65/NT5C3B/POLR2D/MTDH/CELF1/YTHDF1/HNRNPU/LARP1/SUPV3L1/ZC3H18/PSMC2/VCP/PSMC3/PLK1/POLR2G/SMCR8/RAD23A/AMER1/FAF1/HSF1/SUMO2/HMG…	71
BP	GO:0022900	electron transport chain	32/2099	167/18800	0.00156747	0.0112571	0.00937941	NDUFAB1/SLC25A13/CIAPIN1/NDUFS1/DLD/IDH3B/CHCHD2/COX7A2L/PARK7/SDHB/MYBBP1A/CCNB1/NDUFB5/SDHC/NDUFB9/NDUFS2/NDUFB6/GHITM/COX11/NDUFV1/UQCRFS1/CDK1/CYCS/UQCRH/SLC25A22/COX5A/CYC1/NDUFA12/NDUFA6/NDUFA4/UQCC3/NDUFS3	32
BP	GO:1900087	positive regulation of G1/S transition of mitotic cell cycle	14/2099	53/18800	0.00159508	0.0114387	0.00953076	CDC6/APEX1/EIF4G1/CPSF3/STIL/CUL4A/RPTOR/MEPCE/CENPJ/SASS6/RRM1/RRM2/MTBP/TFDP1	14
BP	GO:0032467	positive regulation of cytokinesis	12/2099	42/18800	0.00162954	0.0116521	0.00970849	POLDIP2/CDC6/CDC25B/KIF3B/ECT2/KIF14/CIT/KIF23/KIF20B/RACGAP1/AURKB/NUP62	12
BP	GO:1904591	positive regulation of protein import	12/2099	42/18800	0.00162954	0.0116521	0.00970849	IPO5/RBM22/HSP90AB1/PDCD5/ZPR1/ECT2/TARDBP/TRIM28/RAN/TOMM70/CDK1/HDAC3	12
BP	GO:0000209	protein polyubiquitination	43/2099	244/18800	0.00163545	0.0116578	0.00971325	CDC27/UBE3C/BRCA1/ERCC8/CUL1/UBE2T/ITCH/HUWE1/ANAPC5/CDC23/AXIN1/BFAR/FZR1/UBE2R2/UBE2S/BLMH/PRPF19/RNF8/AREL1/RNF114/UBE2D2/DCAF15/UBE2G1/PLAA/DTL/ANAPC1/RMND5A/RNF20/RUSC1/OTUB1/RNF187/UBE2V2/THOP1/RNF26/PELI3/UBE2C/UBE2O/CDC26/UBE2N/UBOX5/UBE2L3/PPIA/ANAPC7	43
BP	GO:0001682	tRNA 5'-leader removal	6/2099	13/18800	0.0016445	0.0116578	0.00971325	POP1/POP4/RPP40/SSB/RPP30/POP7	6
BP	GO:0006361	transcription initiation from RNA polymerase I promoter	6/2099	13/18800	0.0016445	0.0116578	0.00971325	SMARCB1/PIH1D1/UBTF/TAF1B/SMARCA4/POLR1E	6
BP	GO:0007144	female meiosis I	6/2099	13/18800	0.0016445	0.0116578	0.00971325	TRIP13/NDC80/AURKA/CDC25B/FBXO5/CCNB2	6
BP	GO:0034982	mitochondrial protein processing	6/2099	13/18800	0.0016445	0.0116578	0.00971325	MIPEP/PMPCB/YME1L1/AFG3L2/STOML2/PMPCA	6
BP	GO:0043928	exonucleolytic catabolism of deadenylated mRNA	6/2099	13/18800	0.0016445	0.0116578	0.00971325	EXOSC5/EXOSC3/EXOSC9/EXOSC2/NT5C3B/CNOT7	6
BP	GO:0009129	pyrimidine nucleoside monophosphate metabolic process	8/2099	22/18800	0.00180083	0.0127477	0.0106214	CAD/DHODH/UMPS/DUT/UCK2/TYMS/SHMT1/UCKL1	8
BP	GO:0006505	GPI anchor metabolic process	10/2099	32/18800	0.00187542	0.0132378	0.0110297	DPM1/PIGS/PIGH/PIGU/PIGT/PGAP2/PIGX/PIGO/GPAA1/PIGW	10
BP	GO:0051642	centrosome localization	10/2099	32/18800	0.00187542	0.0132378	0.0110297	PAFAH1B1/INTS13/ASPM/NDE1/AURKA/TBCCD1/GPSM2/DLGAP5/PARD3/MAD2L1	10
BP	GO:0051291	protein heterooligomerization	9/2099	27/18800	0.00190178	0.0134047	0.0111688	CPSF6/FARSB/CPSF7/NUDT21/RRM1/RRM2/FARSA/TMEM120B/ZNF777	9
BP	GO:0032984	protein-containing complex disassembly	42/2099	239/18800	0.00194273	0.0136739	0.0113931	UPF1/VTA1/PHF23/SMARCD1/DHX8/TBC1D25/KIF2A/OGFOD1/TPX2/SUPT16H/SMARCB1/CHMP4B/GSPT1/ZFAND1/GRWD1/SMARCD2/HSPA8/SET/GLE1/ETF1/KIF18A/SMARCA4/EIF5A/UBQLN1/CKAP2/MYC/HMGA1/VPS33A/KATNB1/KIF2C/SSRP1/CCSAP/UBQLN4/ABCE1/GFM2/VCP/MRPL58/PPP1CA/CKAP5/SMCR8/KIF18B/KIF24	42
BP	GO:0046785	microtubule polymerization	19/2099	84/18800	0.00196307	0.0137973	0.0114959	FKBP4/ZNF207/NDE1/TPX2/MAPRE1/GIT1/FBXO5/TUBG1/PSRC1/HAUS2/TUBGCP4/NEDD1/RPS3/CENPJ/CKAP5/CDK5R1/DRG1/DCTN1/MZT1	19
BP	GO:0001825	blastocyst formation	12/2099	43/18800	0.00203409	0.014266	0.0118864	NLE1/CNOT3/CCNB1IP1/SUPT6H/BYSL/SF3B6/MFN2/WDR74/ACTL6A/RPL7L1/RRP7A/CTR9	12
BP	GO:0090316	positive regulation of intracellular protein transport	30/2099	156/18800	0.00203553	0.014266	0.0118864	USP36/IPO5/RBM22/HUWE1/EDEM2/HSP90AB1/MIEF1/TM9SF4/EMD/ZFAND1/PDCD5/AKT2/YWHAE/ZPR1/PDCD10/ECT2/HTRA2/TARDBP/ERGIC3/TRIM28/RAN/NMT1/ANP32B/KIF20B/SAE1/PCNT/CDK1/HDAC3/CDK5R1/UBE2L3	30
BP	GO:0001701	in utero embryonic development	62/2099	387/18800	0.00219286	0.0153469	0.0127871	PSMC4/NSUN2/YBX1/NLE1/KEAP1/PALB2/CNOT3/MSH2/SMARCB1/RTCB/ALKBH1/CCNB1IP1/CHD8/GINS1/HM13/DHX35/AXIN1/RPGRIP1L/ERCC2/ASF1B/GPI/B9D1/SUPT6H/ZPR1/BYSL/SF3B6/MFN2/NEK2/STIL/MED1/EIF2S2/PRMT1/EMG1/TRIM28/NASP/WDR74/CCNB1/TTLL4/NMT1/ACTL6A/MYC/BRCA2/CUL4A/COPS3/PLK4/BTF3/RPL7L1/PSPH/NCAPG2/NSDHL/GINS4/CHEK1/CCNB2/DNAAF2/E2F7/MAP2K1/RRM2/RIC8A/RRP7A/XRCC2/ZNF335/CTR9	62
BP	GO:0002097	tRNA wobble base modification	7/2099	18/18800	0.0022328	0.0154947	0.0129102	ELP1/TRMU/ALKBH1/MOCS3/GTPBP3/CTU2/KTI12	7
BP	GO:0006085	acetyl-CoA biosynthetic process	7/2099	18/18800	0.0022328	0.0154947	0.0129102	ACAT1/DLD/PDHX/ACSS2/ACLY/PDHA1/DLAT	7
BP	GO:0006851	mitochondrial calcium ion transmembrane transport	7/2099	18/18800	0.0022328	0.0154947	0.0129102	MCUR1/PMPCB/AFG3L2/MAIP1/STOML2/LETM1/VDAC1	7
BP	GO:0007096	regulation of exit from mitosis	7/2099	18/18800	0.0022328	0.0154947	0.0129102	ANLN/ZW10/CDC23/MAD2L1BP/CDCA5/UBE2C/PHB2	7
BP	GO:0015936	coenzyme A metabolic process	7/2099	18/18800	0.0022328	0.0154947	0.0129102	COASY/ACAT1/ACOT7/HMGCR/PANK2/ACLY/PANK4	7
BP	GO:0046040	IMP metabolic process	7/2099	18/18800	0.0022328	0.0154947	0.0129102	PAICS/PPAT/ATIC/GART/HPRT1/PFAS/PNP	7
BP	GO:0072332	intrinsic apoptotic signaling pathway by p53 class mediator	18/2099	79/18800	0.002338	0.016202	0.0134995	KDM1A/E2F2/SNW1/E2F1/MYBBP1A/EIF5A/MYC/BRCA2/HNRNPK/ING2/HINT1/TRIAP1/RPS7/ATAD5/AEN/CHEK2/BAG6/TAF9	18
BP	GO:0048524	positive regulation of viral process	15/2099	61/18800	0.0023942	0.0165683	0.0138047	TYRO3/SRPK1/VAPB/STAU1/TOP2A/DHX9/TARBP2/LARP1/DDB1/PPID/PPIH/RAD23A/KPNA2/PPIA/CNOT7	15
BP	GO:0061842	microtubule organizing center localization	10/2099	33/18800	0.00242522	0.0167594	0.013964	PAFAH1B1/INTS13/ASPM/NDE1/AURKA/TBCCD1/GPSM2/DLGAP5/PARD3/MAD2L1	10
BP	GO:0010457	centriole-centriole cohesion	6/2099	14/18800	0.00260755	0.0179943	0.0149929	NEK2/CEP250/SGO1/ODF2/RTTN/DCTN1	6
BP	GO:0030433	ubiquitin-dependent ERAD pathway	19/2099	86/18800	0.00261342	0.0180097	0.0150056	HSPA5/UFD1/EDEM2/FOXRED2/PSMC6/USP14/SGTA/CCDC47/AUP1/CANX/UBQLN1/DERL1/RNF121/VCP/HSP90B1/CALR/NPLOC4/FAF1/BAG6	19
BP	GO:0009157	deoxyribonucleoside monophosphate biosynthetic process	5/2099	10/18800	0.00268256	0.0183074	0.0152537	DUT/ADK/TK1/TYMS/SHMT1	5
BP	GO:0009396	folic acid-containing compound biosynthetic process	5/2099	10/18800	0.00268256	0.0183074	0.0152537	MTHFD1/MTHFD1L/ATIC/GART/DHFR	5
BP	GO:0031442	positive regulation of mRNA 3'-end processing	5/2099	10/18800	0.00268256	0.0183074	0.0152537	PAF1/NCBP1/LEO1/NUDT21/HSF1	5
BP	GO:0035247	peptidyl-arginine omega-N-methylation	5/2099	10/18800	0.00268256	0.0183074	0.0152537	PRMT5/PRMT1/CARM1/PRMT3/PRMT6	5
BP	GO:0045050	protein insertion into ER membrane by stop-transfer membrane-anchor sequence	5/2099	10/18800	0.00268256	0.0183074	0.0152537	EMC9/EMC1/EMC4/EMC8/MMGT1	5
BP	GO:0045144	meiotic sister chromatid segregation	5/2099	10/18800	0.00268256	0.0183074	0.0152537	RAD51C/SGO1/BUB1B/SGO2/BUB1	5
BP	GO:0051177	meiotic sister chromatid cohesion	5/2099	10/18800	0.00268256	0.0183074	0.0152537	RAD51C/SGO1/BUB1B/SGO2/BUB1	5
BP	GO:0070507	regulation of microtubule cytoskeleton organization	29/2099	152/18800	0.00270339	0.018424	0.0153509	FKBP4/PAFAH1B1/TACC3/SPAG5/TPX2/RAE1/MAPRE1/CHMP4B/FSD1/GIT1/KIF18A/GPSM2/PSRC1/CKAP2/BORA/KATNB1/RPS3/HNRNPU/CCSAP/SKA1/KIF15/SKA3/PLK1/CKAP5/CDK5R1/DRG1/DYNC1H1/DCTN1/NUP62	29
BP	GO:0032506	cytokinetic process	11/2099	39/18800	0.00281877	0.0191576	0.0159621	ANLN/CHMP4B/KIF20A/ECT2/CEP55/KIF20B/ALKBH4/RACGAP1/CNTROB/AURKB/NUP62	11
BP	GO:0051567	histone H3-K9 methylation	11/2099	39/18800	0.00281877	0.0191576	0.0159621	KDM1A/BRCA1/RIF1/SMARCB1/SUV39H1/PIH1D1/DNMT1/SUV39H2/BEND3/KDM4D/EHMT2	11
BP	GO:0022411	cellular component disassembly	71/2099	460/18800	0.00293411	0.019914	0.0165924	UPF1/SLC25A5/PAFAH1B1/VTA1/PHF23/USP36/SMARCD1/DHX8/TBC1D25/KIF2A/MTIF2/HUWE1/OGFOD1/TPX2/SUPT16H/SMARCB1/VRK1/CHMP4B/GSPT1/ZFAND1/GRWD1/SMARCD2/HSPA8/CAMKK2/HTRA2/PARK7/MFN2/SET/GLE1/ETF1/KIF18A/SMARCA4/TOP2A/ARFIP2/EIF5A/UBQLN1/CKAP2/CTSV/MYC/HMGA1/VPS33A/DENR/KATNB1/KIF2C/HAX1/ATG3/CISD2/SSRP1/CCSAP/AIFM1/WIPI2/ATP13A2/DFFA/UBQLN4/ABCE1/GFM2/VCP/PLK1/MRPL58/DFFB/CDK1/PPP1CA/CKAP5/SMCR8/HSF1/KI…	71
BP	GO:2001233	regulation of apoptotic signaling pathway	59/2099	370/18800	0.00307073	0.0208127	0.0173412	KDM1A/SLC25A5/MAPK8IP2/BRCA1/TMEM161A/GNAI3/NLE1/ENO1/DNAJA1/ZC3HC1/CSNK2A1/PSMD10/MAZ/PIH1D1/PIAS4/PTPMT1/HTRA2/PARK7/HDAC1/SFPQ/TXNDC12/HELLS/PLAGL2/BCL2L12/TRAP1/PSME3/TRAF7/FIGNL1/EIF5A/UBQLN1/MYC/SOD1/PARP1/NONO/RPS3/HYOU1/HMGB2/HNRNPK/DDIAS/VDAC2/GHITM/BAG5/PRDX2/ING2/PRELID1/TRIAP1/RPS7/PPP1CA/PELI3/ATAD5/FAF1/FZD9/NOC2L/PPIA/PTPN1/OPA1/NDUFS3/TAF9/AATF	59
BP	GO:0045047	protein targeting to ER	12/2099	45/18800	0.00308972	0.0208772	0.0173949	HSPA5/SRP54/CHMP4B/UBL4A/SGTA/SSR3/SEC61G/SRPRB/SRP68/SRP72/GET3/BAG6	12
BP	GO:0034724	DNA replication-independent chromatin organization	10/2099	34/18800	0.00309704	0.0208772	0.0173949	SUPT16H/HIRA/OIP5/ASF1B/HJURP/HAT1/NASP/MIS18A/CENPP/CENPW	10
BP	GO:1905508	protein localization to microtubule organizing center	10/2099	34/18800	0.00309704	0.0208772	0.0173949	NUDCD3/SPAG5/AURKA/MAPRE1/CEP72/WRAP73/STIL/CEP250/DCTN2/NUP62	10
BP	GO:1902806	regulation of cell cycle G1/S phase transition	34/2099	188/18800	0.00309714	0.0208772	0.0173949	PAF1/MNAT1/GTSE1/RBL1/CDC6/APEX1/E2F1/FAM83D/EZH2/PPP2CA/EIF4G1/KIF14/CPSF3/STIL/PSME3/MEN1/CDK7/CUL4A/RPTOR/MEPCE/CENPJ/SASS6/E2F7/BRD7/RRM1/RFWD3/TRIAP1/RRM2/MTBP/CHEK2/DDRGK1/TFDP1/PHB2/PRKDC	34
BP	GO:0000028	ribosomal small subunit assembly	7/2099	19/18800	0.00319786	0.02141	0.0178388	XRCC5/RPS5/MRPS7/ERAL1/MRPS11/RRP7A/PRKDC	7
BP	GO:0009048	dosage compensation by inactivation of X chromosome	7/2099	19/18800	0.00319786	0.02141	0.0178388	UPF1/BRCA1/HNRNPU/RBM15/EXOSC10/EIF1/SUZ12	7
BP	GO:0009148	pyrimidine nucleoside triphosphate biosynthetic process	7/2099	19/18800	0.00319786	0.02141	0.0178388	CAD/UCK2/DTYMK/CTPS1/TYMS/UCKL1/NME1	7
BP	GO:0032785	negative regulation of DNA-templated transcription, elongation	7/2099	19/18800	0.00319786	0.02141	0.0178388	NELFCD/AXIN1/EZH2/RNF8/HNRNPU/SUPT5H/NELFE	7
BP	GO:0045947	negative regulation of translational initiation	7/2099	19/18800	0.00319786	0.02141	0.0178388	EIF2AK1/EIF3E/PAIP2/AGO2/EIF2S1/LARP1/EIF4EBP1	7
BP	GO:0033157	regulation of intracellular protein transport	39/2099	224/18800	0.00325361	0.0217538	0.0181253	USP36/IPO5/XPO1/RBM22/HUWE1/EDEM2/HSP90AB1/MIEF1/RANGAP1/TM9SF4/EMD/ZFAND1/PDCD5/AKT2/YWHAE/ZPR1/PDCD10/ECT2/HTRA2/SUMO1/PARK7/TARDBP/ERGIC3/TRIM28/RAN/NMT1/ANP32B/KIF20B/NUP54/SAE1/HAX1/ATP13A2/PCNT/NOLC1/CDK1/HDAC3/CDK5R1/UBE2L3/PTPN1	39
BP	GO:0090169	regulation of spindle assembly	9/2099	29/18800	0.00330797	0.0220364	0.0183607	SPAG5/CHMP4B/GPSM2/HNRNPU/CCSAP/KIF15/PLK1/DRG1/DYNC1H1	9
BP	GO:2001032	regulation of double-strand break repair via nonhomologous end joining	9/2099	29/18800	0.00330797	0.0220364	0.0183607	RIF1/NSD2/MAD2L2/DEK/AUNIP/WRAP53/HSF1/KDM4D/PRKDC	9
BP	GO:0009145	purine nucleoside triphosphate biosynthetic process	16/2099	69/18800	0.00330925	0.0220364	0.0183607	SLC25A13/ENO1/ATP5F1B/ATP5PB/MYC/PARP1/ATP5F1A/ATP5MC3/ADK/ATP5MC1/VCP/STOML2/ATP5F1C/IMPDH2/UQCC3/NME1	16
BP	GO:0006998	nuclear envelope organization	14/2099	57/18800	0.00333561	0.022182	0.0184821	PAFAH1B1/VRK1/CHMP4B/EMD/NUP93/LMNB1/NUP155/TARDBP/PLK1/NEMP1/UBXN2A/BANF1/RCC1/DCTN1	14
BP	GO:0042026	protein refolding	8/2099	24/18800	0.00337917	0.0224415	0.0186983	HSPA5/HSP90AA1/DNAJA1/HSPA8/HSPA9/HSPD1/BAG5/HSPA14	8
BP	GO:1903052	positive regulation of proteolysis involved in cellular protein catabolic process	26/2099	134/18800	0.0034376	0.0227989	0.0189961	PSMC4/USP13/KEAP1/AURKA/PSMC6/PSMC1/TRIB3/PSMD10/CCDC22/AXIN1/SGTA/FZR1/USP5/SUMO1/CDC20/HSPBP1/UBQLN1/BBS7/PSMC2/VCP/PSMC3/PLK1/RAD23A/SUMO2/DDRGK1/BAG6	26
BP	GO:0000266	mitochondrial fission	11/2099	40/18800	0.00350222	0.0231653	0.0193013	RALA/COX10/MTFR1/AURKA/MIEF1/AP3B1/MTFR2/CYRIB/OPA1/PGAM5/MYO19	11
BP	GO:0016233	telomere capping	11/2099	40/18800	0.00350222	0.0231653	0.0193013	MRE11/XRCC1/MAPKAPK5/NEK2/DCLRE1B/HNRNPD/NABP2/TERF1/AURKB/DCLRE1A/PRKDC	11
BP	GO:0051101	regulation of DNA binding	24/2099	121/18800	0.00359553	0.0237507	0.0197891	KDM1A/TFAP4/E2F1/ERCC2/DOT1L/SUMO1/PARK7/MAD2L2/NEK2/HJURP/TRIM28/MYC/PARP1/CALM2/HMGB2/NSD1/CDT1/SUMO3/HMGB1/HDAC2/DDRGK1/CPNE1/NME1/PINX1	24
BP	GO:0051098	regulation of binding	58/2099	366/18800	0.0038002	0.0250691	0.0208876	POLDIP2/KDM1A/DDX11/AURKA/TFAP4/GEMIN2/HSP90AB1/EIF3D/ADNP/TRIB3/MAPRE1/E2F1/EIF3E/ERCC2/DOT1L/GTPBP4/GMNN/PPP2CA/EIF4G1/SUMO1/PARK7/MAD2L2/NEK2/HJURP/GTF2F1/SYMPK/GNL3L/TRIM28/RAN/MEN1/EIF2S1/DHX9/NCBP1/DERL1/MYC/TDG/EIF4A3/CARM1/NVL/PARP1/CALM2/MEPCE/HMGB2/NSD1/PLK1/CDT1/PPP1CA/AURKB/EIF3C/SUMO3/HSF1/KDM4D/HMGB1/HDAC2/DDRGK1/CPNE1/NME1/PINX1	58
BP	GO:0001325	formation of extrachromosomal circular DNA	6/2099	15/18800	0.00393873	0.0256407	0.0213638	XRCC5/DNA2/SMARCAL1/TERF1/EXO1/BLM	6
BP	GO:0002098	tRNA wobble uridine modification	6/2099	15/18800	0.00393873	0.0256407	0.0213638	ELP1/TRMU/MOCS3/GTPBP3/CTU2/KTI12	6
BP	GO:0006206	pyrimidine nucleobase metabolic process	6/2099	15/18800	0.00393873	0.0256407	0.0213638	CAD/DHODH/UMPS/CTPS1/TYMS/MTOR	6
BP	GO:0016446	somatic hypermutation of immunoglobulin genes	6/2099	15/18800	0.00393873	0.0256407	0.0213638	POLQ/UNG/MSH2/MSH6/PMS2/EXO1	6
BP	GO:0032239	regulation of nucleobase-containing compound transport	6/2099	15/18800	0.00393873	0.0256407	0.0213638	NSUN2/SUPT6H/CPSF6/KHDRBS1/NUP153/DHX9	6
BP	GO:0048308	organelle inheritance	6/2099	15/18800	0.00393873	0.0256407	0.0213638	VRK1/PDCD10/STK25/YWHAZ/MAP2K1/CDK1	6
BP	GO:0048313	Golgi inheritance	6/2099	15/18800	0.00393873	0.0256407	0.0213638	VRK1/PDCD10/STK25/YWHAZ/MAP2K1/CDK1	6
BP	GO:0090656	t-circle formation	6/2099	15/18800	0.00393873	0.0256407	0.0213638	XRCC5/DNA2/SMARCAL1/TERF1/EXO1/BLM	6
BP	GO:0090737	telomere maintenance via telomere trimming	6/2099	15/18800	0.00393873	0.0256407	0.0213638	XRCC5/DNA2/SMARCAL1/TERF1/EXO1/BLM	6
BP	GO:2000767	positive regulation of cytoplasmic translation	6/2099	15/18800	0.00393873	0.0256407	0.0213638	YBX1/SYNCRIP/DHX9/HNRNPD/HNRNPU/CNBP	6
BP	GO:0010458	exit from mitosis	9/2099	30/18800	0.00426466	0.0276532	0.0230406	ANLN/ZW10/CDC23/CHMP4B/UBE2S/MAD2L1BP/CDCA5/UBE2C/PHB2	9
BP	GO:0032786	positive regulation of DNA-templated transcription, elongation	9/2099	30/18800	0.00426466	0.0276532	0.0230406	SUPT16H/THOC5/SUPT6H/GTF2F1/LEO1/CDK12/ALYREF/SUPT5H/HMGN1	9
BP	GO:0045948	positive regulation of translational initiation	9/2099	30/18800	0.00426466	0.0276532	0.0230406	KHDRBS1/POLR2D/EIF2B5/YTHDF1/CDC123/LARP1/POLR2G/RPS6KB2/MTOR	9
BP	GO:0006458	'de novo' protein folding	11/2099	41/18800	0.00431206	0.0279239	0.0232662	HSPA5/ST13/DNAJC2/HSPA8/PTGES3/HSPA9/HSPD1/CHCHD4/CCT2/DNAJC7/HSPA14	11
BP	GO:1903364	positive regulation of cellular protein catabolic process	29/2099	157/18800	0.0043944	0.0284198	0.0236794	PSMC4/USP13/KEAP1/HSP90AA1/AURKA/PSMC6/PSMC1/TRIB3/PSMD10/CCDC22/AXIN1/SGTA/FZR1/USP5/SUMO1/CDC20/HSPBP1/UBQLN1/BBS7/PSMC2/VCP/PSMC3/PLK1/RAD23A/AMER1/FAF1/SUMO2/DDRGK1/BAG6	29
BP	GO:0043984	histone H4-K16 acetylation	7/2099	20/18800	0.00445122	0.0285611	0.0237971	BRCA1/PHF20/PIH1D1/KANSL2/HCFC1/MCRS1/WDR5	7
BP	GO:1901659	glycosyl compound biosynthetic process	7/2099	20/18800	0.00445122	0.0285611	0.0237971	AMD1/ADK/HPRT1/DTYMK/UCKL1/PNP/TYW1	7
BP	GO:0001731	formation of translation preinitiation complex	5/2099	11/18800	0.00446827	0.0285611	0.0237971	EIF5/EIF4H/EIF2S2/EIF2S3/DENR	5
BP	GO:0006122	mitochondrial electron transport, ubiquinol to cytochrome c	5/2099	11/18800	0.00446827	0.0285611	0.0237971	UQCRFS1/CYCS/UQCRH/CYC1/UQCC3	5
BP	GO:0006222	UMP biosynthetic process	5/2099	11/18800	0.00446827	0.0285611	0.0237971	CAD/DHODH/UMPS/UCK2/UCKL1	5
BP	GO:0009174	pyrimidine ribonucleoside monophosphate biosynthetic process	5/2099	11/18800	0.00446827	0.0285611	0.0237971	CAD/DHODH/UMPS/UCK2/UCKL1	5
BP	GO:0015937	coenzyme A biosynthetic process	5/2099	11/18800	0.00446827	0.0285611	0.0237971	COASY/ACAT1/ACOT7/PANK2/PANK4	5
BP	GO:0035246	peptidyl-arginine N-methylation	5/2099	11/18800	0.00446827	0.0285611	0.0237971	PRMT5/PRMT1/CARM1/PRMT3/PRMT6	5
BP	GO:1901978	positive regulation of cell cycle checkpoint	5/2099	11/18800	0.00446827	0.0285611	0.0237971	NDC80/PCID2/DYNC1LI1/MAD2L1/GEN1	5
BP	GO:0046033	AMP metabolic process	8/2099	25/18800	0.00448982	0.0285879	0.0238195	AK2/PAICS/PPAT/ATIC/ADK/GART/HPRT1/PFAS	8
BP	GO:0051307	meiotic chromosome separation	8/2099	25/18800	0.00448982	0.0285879	0.0238195	NCAPH2/TTK/NCAPH/TOP2A/ESPL1/EME1/CENPX/FANCM	8
BP	GO:0051570	regulation of histone H3-K9 methylation	8/2099	25/18800	0.00448982	0.0285879	0.0238195	KDM1A/BRCA1/RIF1/SMARCB1/PIH1D1/DNMT1/KDM4D/EHMT2	8
BP	GO:0045738	negative regulation of DNA repair	10/2099	36/18800	0.00488037	0.0310346	0.0258581	POLQ/RIF1/MAD2L2/AUNIP/RPS3/UBQLN4/OTUB1/FANCB/HSF1/PARPBP	10
BP	GO:0009167	purine ribonucleoside monophosphate metabolic process	11/2099	42/18800	0.00526393	0.033345	0.027783	AK2/PAICS/PPAT/ATIC/ADK/GART/GMPS/HPRT1/IMPDH2/PFAS/PNP	11
BP	GO:0045292	mRNA cis splicing, via spliceosome	11/2099	42/18800	0.00526393	0.033345	0.027783	CLNS1A/WBP11/RBM22/SF3A1/SNRPC/SRSF1/NCBP1/SNRNP200/DDX23/SART1/PRPF40A	11
BP	GO:0071763	nuclear membrane organization	11/2099	42/18800	0.00526393	0.033345	0.027783	PAFAH1B1/VRK1/CHMP4B/EMD/TARDBP/PLK1/NEMP1/UBXN2A/BANF1/RCC1/DCTN1	11
BP	GO:0006783	heme biosynthetic process	9/2099	31/18800	0.00542399	0.0343149	0.0285912	COX10/SLC25A39/FECH/CPOX/SRRD/ABCB7/ABCB10/IBA57/HMBS	9
BP	GO:0002566	somatic diversification of immune receptors via somatic mutation	6/2099	16/18800	0.00571303	0.0359593	0.0299613	POLQ/UNG/MSH2/MSH6/PMS2/EXO1	6
BP	GO:0009163	nucleoside biosynthetic process	6/2099	16/18800	0.00571303	0.0359593	0.0299613	AMD1/ADK/HPRT1/DTYMK/UCKL1/PNP	6
BP	GO:0018216	peptidyl-arginine methylation	6/2099	16/18800	0.00571303	0.0359593	0.0299613	PRMT5/PRMT1/CARM1/COPRS/PRMT3/PRMT6	6
BP	GO:0034404	nucleobase-containing small molecule biosynthetic process	6/2099	16/18800	0.00571303	0.0359593	0.0299613	AMD1/ADK/HPRT1/DTYMK/UCKL1/PNP	6
BP	GO:2000045	regulation of G1/S transition of mitotic cell cycle	29/2099	160/18800	0.00578325	0.036355	0.030291	MNAT1/GTSE1/RBL1/CDC6/APEX1/E2F1/EZH2/PPP2CA/EIF4G1/KIF14/CPSF3/STIL/PSME3/CDK7/CUL4A/RPTOR/MEPCE/CENPJ/SASS6/E2F7/BRD7/RRM1/RFWD3/TRIAP1/RRM2/MTBP/CHEK2/TFDP1/PRKDC	29
BP	GO:1900151	regulation of nuclear-transcribed mRNA catabolic process, deadenylation-dependent decay	8/2099	26/18800	0.00586059	0.0367944	0.0306571	YBX1/TENT4B/AGO2/SYNCRIP/DHX9/HNRNPD/HNRNPU/CNOT7	8
BP	GO:0043462	regulation of ATP-dependent activity	16/2099	73/18800	0.00594566	0.0372811	0.0310626	MNAT1/ATP1B3/MCM2/DNAJB11/MSH2/AHSA1/SSBP1/THADA/SUMO1/MSH6/DHX9/HNRNPU/OXA1L/VMA21/DNAJC9/UHRF1	16
BP	GO:0009070	serine family amino acid biosynthetic process	7/2099	21/18800	0.00604228	0.0378389	0.0315274	SEPHS1/MTHFD1/PSAT1/PSPH/SHMT1/SHMT2/DHFR	7
BP	GO:0042771	intrinsic apoptotic signaling pathway in response to DNA damage by p53 class mediator	11/2099	43/18800	0.00637418	0.0398669	0.0332171	KDM1A/SNW1/BRCA2/HNRNPK/ING2/TRIAP1/ATAD5/AEN/CHEK2/BAG6/TAF9	11
BP	GO:0072599	establishment of protein localization to endoplasmic reticulum	12/2099	49/18800	0.00651444	0.0406926	0.0339051	HSPA5/SRP54/CHMP4B/UBL4A/SGTA/SSR3/SEC61G/SRPRB/SRP68/SRP72/GET3/BAG6	12
BP	GO:0071539	protein localization to centrosome	9/2099	32/18800	0.00681256	0.0424475	0.0353673	NUDCD3/SPAG5/AURKA/MAPRE1/CEP72/STIL/CEP250/DCTN2/NUP62	9
BP	GO:1902253	regulation of intrinsic apoptotic signaling pathway by p53 class mediator	9/2099	32/18800	0.00681256	0.0424475	0.0353673	KDM1A/EIF5A/MYC/HNRNPK/ING2/TRIAP1/RPS7/ATAD5/TAF9	9
BP	GO:0010821	regulation of mitochondrion organization	27/2099	148/18800	0.00691951	0.0428362	0.0356911	SLC25A5/RALA/USP36/HUWE1/AURKA/MIEF1/PSMD10/PDCD5/SSBP1/MTCH2/CAMKK2/HTRA2/PARK7/NMT1/HAX1/CYRIB/ATP13A2/STOML2/GHITM/PRELID1/TRIAP1/FZD9/OPA1/PRMT6/VDAC1/PGAM5/MYO19	27
BP	GO:0000012	single strand break repair	5/2099	12/18800	0.00696164	0.0428362	0.0356911	TDP1/ERCC8/XRCC1/APTX/PARP1	5
BP	GO:0006285	base-excision repair, AP site formation	5/2099	12/18800	0.00696164	0.0428362	0.0356911	NTHL1/UNG/NEIL3/MBD4/TDG	5
BP	GO:0033523	histone H2B ubiquitination	5/2099	12/18800	0.00696164	0.0428362	0.0356911	PAF1/RNF8/RNF20/LEO1/CTR9	5
BP	GO:0034969	histone arginine methylation	5/2099	12/18800	0.00696164	0.0428362	0.0356911	PRMT5/PRMT1/CARM1/COPRS/PRMT6	5
BP	GO:0051095	regulation of helicase activity	5/2099	12/18800	0.00696164	0.0428362	0.0356911	MNAT1/MCM2/MSH2/SSBP1/MSH6	5
BP	GO:0051255	spindle midzone assembly	5/2099	12/18800	0.00696164	0.0428362	0.0356911	KIF4A/KIF23/INCENP/RACGAP1/AURKB	5
BP	GO:0071712	ER-associated misfolded protein catabolic process	5/2099	12/18800	0.00696164	0.0428362	0.0356911	UFD1/AUP1/DERL1/VCP/BAG6	5
BP	GO:0072711	cellular response to hydroxyurea	5/2099	12/18800	0.00696164	0.0428362	0.0356911	DDX11/RTF2/RAD51/TIMELESS/BLM	5
BP	GO:1904667	negative regulation of ubiquitin protein ligase activity	5/2099	12/18800	0.00696164	0.0428362	0.0356911	FBXO5/MAD2L2/RPL5/MAD2L1/RPS7	5
BP	GO:0009206	purine ribonucleoside triphosphate biosynthetic process	15/2099	68/18800	0.00714328	0.0438992	0.0365768	SLC25A13/ENO1/ATP5F1B/ATP5PB/MYC/PARP1/ATP5F1A/ATP5MC3/ATP5MC1/VCP/STOML2/ATP5F1C/IMPDH2/UQCC3/NME1	15
BP	GO:0071482	cellular response to light stimulus	23/2099	121/18800	0.00735358	0.0450795	0.0375602	KDM1A/POLD1/TMEM161A/POLD3/YY1/ACTR5/AKT2/PCNA/EIF2S1/NMT1/MYC/PARP1/CHEK1/CDC25A/DDB1/PBK/TRIAP1/PPID/RHNO1/AURKB/NPM1/RUVBL2/NOC2L	23
BP	GO:1903008	organelle disassembly	23/2099	121/18800	0.00735358	0.0450795	0.0375602	SLC25A5/USP36/MTIF2/HUWE1/VRK1/ZFAND1/CAMKK2/HTRA2/PARK7/MFN2/ARFIP2/DENR/HAX1/ATG3/CISD2/WIPI2/ATP13A2/GFM2/VCP/CDK1/DDRGK1/VDAC1/PHB2	23
BP	GO:1902229	regulation of intrinsic apoptotic signaling pathway in response to DNA damage	10/2099	38/18800	0.0073829	0.0452031	0.0376632	KDM1A/TMEM161A/PIAS4/RPS3/HNRNPK/DDIAS/ING2/TRIAP1/ATAD5/TAF9	10
BP	GO:0006515	protein quality control for misfolded or incompletely synthesized proteins	8/2099	27/18800	0.00752747	0.0460312	0.0383532	UFD1/AUP1/CLPP/YME1L1/DERL1/VCP/LONP1/BAG6	8
BP	GO:0008630	intrinsic apoptotic signaling pathway in response to DNA damage	20/2099	101/18800	0.00757297	0.0462522	0.0385373	KDM1A/BRCA1/TMEM161A/SNW1/E2F1/PIAS4/HTRA2/MSH6/BRCA2/RPS3/HNRNPK/DDIAS/ING2/TRIAP1/ATAD5/AEN/CHEK2/BAG6/PRKDC/TAF9	20
BP	GO:0009126	purine nucleoside monophosphate metabolic process	11/2099	44/18800	0.00765983	0.0466674	0.0388833	AK2/PAICS/PPAT/ATIC/ADK/GART/GMPS/HPRT1/IMPDH2/PFAS/PNP	11
BP	GO:0045840	positive regulation of mitotic nuclear division	11/2099	44/18800	0.00765983	0.0466674	0.0388833	CDC27/AURKA/ANAPC5/CDC23/MAD2L1BP/DLGAP5/ESPL1/NSMCE2/CDT1/ANAPC7/NUP62	11
BP	GO:0061647	histone H3-K9 modification	12/2099	50/18800	0.00772016	0.046977	0.0391412	KDM1A/BRCA1/RIF1/SMARCB1/SUV39H1/PIH1D1/DNMT1/CHEK1/SUV39H2/BEND3/KDM4D/EHMT2	12
BP	GO:0007029	endoplasmic reticulum organization	18/2099	88/18800	0.00779829	0.047394	0.0394887	TMEM38B/EMC9/UBL4A/SGTA/CCDC47/BNIP1/ATL2/VAPB/EMC1/EMC4/EMC8/SMPD4/PEX5/CAMLG/MMGT1/JAGN1/GET3/BAG6	18
BP	GO:0006390	mitochondrial transcription	6/2099	17/18800	0.00800625	0.0484197	0.0403433	TWNK/TFAM/MTERF1/TFB2M/SLC25A33/TEFM	6
BP	GO:0036124	histone H3-K9 trimethylation	6/2099	17/18800	0.00800625	0.0484197	0.0403433	SMARCB1/SUV39H1/PIH1D1/SUV39H2/BEND3/KDM4D	6
BP	GO:1902165	regulation of intrinsic apoptotic signaling pathway in response to DNA damage by p53 class mediator	6/2099	17/18800	0.00800625	0.0484197	0.0403433	KDM1A/HNRNPK/ING2/TRIAP1/ATAD5/TAF9	6
BP	GO:2001267	regulation of cysteine-type endopeptidase activity involved in apoptotic signaling pathway	6/2099	17/18800	0.00800625	0.0484197	0.0403433	NLE1/TFAP4/PIH1D1/HTRA2/PARK7/PRR7	6
BP	GO:1901292	nucleoside phosphate catabolic process	17/2099	82/18800	0.00833424	0.0503417	0.0419447	NTHL1/ACAT1/UNG/ACOT7/ITPA/DUT/MBD4/NUDT15/TDG/VCP/NUDT5/HPRT1/HINT1/DCTPP1/FITM2/ENTPD6/PNP	17
BP	GO:0006084	acetyl-CoA metabolic process	9/2099	33/18800	0.00845782	0.0509635	0.0424628	ACAT1/DLD/PDHX/DLST/ACSS2/ACLY/PDHA1/DLAT/ACACA	9
BP	GO:0006336	DNA replication-independent chromatin assembly	9/2099	33/18800	0.00845782	0.0509635	0.0424628	HIRA/OIP5/ASF1B/HJURP/HAT1/NASP/MIS18A/CENPP/CENPW	9
BP	GO:0006767	water-soluble vitamin metabolic process	14/2099	63/18800	0.00858453	0.051664	0.0430465	MTHFD2/SLC25A19/PANK2/MMACHC/PSAT1/MMAB/FLAD1/CD320/MMADHC/SLC19A1/SHMT1/SHMT2/SLC52A2/DHFR	14
BP	GO:0036503	ERAD pathway	21/2099	109/18800	0.00868449	0.052202	0.0434947	HSPA5/USP13/UFD1/EDEM2/FOXRED2/PSMC6/HM13/USP14/SGTA/CCDC47/AUP1/CANX/UBQLN1/DERL1/RNF121/VCP/HSP90B1/CALR/NPLOC4/FAF1/BAG6	21
BP	GO:0006754	ATP biosynthetic process	13/2099	57/18800	0.00889224	0.0532564	0.0443732	SLC25A13/ENO1/ATP5F1B/ATP5PB/MYC/PARP1/ATP5F1A/ATP5MC3/ATP5MC1/VCP/STOML2/ATP5F1C/UQCC3	13
BP	GO:0042306	regulation of protein import into nucleus	13/2099	57/18800	0.00889224	0.0532564	0.0443732	IPO5/RBM22/HSP90AB1/ZPR1/ECT2/SUMO1/TARDBP/TRIM28/RAN/NUP54/NOLC1/CDK1/HDAC3	13
BP	GO:0070534	protein K63-linked ubiquitination	13/2099	57/18800	0.00889224	0.0532564	0.0443732	UBE2T/ITCH/BFAR/UBE2S/PRPF19/RNF8/UBE2G1/PLAA/OTUB1/UBE2V2/PELI3/UBE2O/UBE2N	13
BP	GO:0032728	positive regulation of interferon-beta production	10/2099	39/18800	0.00895673	0.053513	0.044587	POLR3B/HSP90AA1/POLR3G/POLR3F/DHX9/POLR3A/TOMM70/HMGB2/POLR3D/POLR3C	10
BP	GO:0042307	positive regulation of protein import into nucleus	10/2099	39/18800	0.00895673	0.053513	0.044587	IPO5/RBM22/HSP90AB1/ZPR1/ECT2/TARDBP/TRIM28/RAN/CDK1/HDAC3	10
BP	GO:0009132	nucleoside diphosphate metabolic process	24/2099	130/18800	0.00904338	0.0539654	0.044964	AK2/ENO1/CAD/PGK1/DHODH/GPI/OGDH/GIT1/GAPDH/TPI1/UMPS/LDHA/MYC/FOXK2/PFKM/NUDT5/RRM1/DTYMK/PGAM1/RRM2/PRKAG1/ENTPD6/NME1/EIF6	24
BP	GO:0006120	mitochondrial electron transport, NADH to ubiquinone	12/2099	51/18800	0.0090939	0.054071	0.0450519	NDUFAB1/NDUFS1/DLD/PARK7/NDUFB5/NDUFB9/NDUFS2/NDUFB6/NDUFV1/NDUFA6/NDUFA4/NDUFS3	12
BP	GO:0019083	viral transcription	12/2099	51/18800	0.0090939	0.054071	0.0450519	TAF11/TFAP4/SMARCB1/SNW1/HDAC1/TARDBP/ZNF639/SMARCA4/DHX9/TARBP2/RRP1B/PSMC3	12
BP	GO:0051445	regulation of meiotic cell cycle	12/2099	51/18800	0.0090939	0.054071	0.0450519	ASPM/TRIP13/CDC25B/FZR1/RAD51AP1/FBXO5/TTK/RAD1/CDC20/CDC25C/CDC25A/CALR	12
BP	GO:0016572	histone phosphorylation	11/2099	45/18800	0.0091384	0.0540752	0.0450555	BAZ1B/VRK2/AURKA/VRK1/MACROH2A1/CCNA2/INCENP/CHEK1/CDK1/HASPIN/AURKB	11
BP	GO:0032781	positive regulation of ATP-dependent activity	11/2099	45/18800	0.0091384	0.0540752	0.0450555	ATP1B3/DNAJB11/MSH2/AHSA1/SSBP1/SUMO1/MSH6/DHX9/HNRNPU/DNAJC9/UHRF1	11
BP	GO:0035384	thioester biosynthetic process	11/2099	45/18800	0.0091384	0.0540752	0.0450555	ELOVL5/ACAT1/DLD/GCDH/PDHX/ACSS2/ACLY/PDHA1/DLAT/HACD2/ACACA	11
BP	GO:0071616	acyl-CoA biosynthetic process	11/2099	45/18800	0.0091384	0.0540752	0.0450555	ELOVL5/ACAT1/DLD/GCDH/PDHX/ACSS2/ACLY/PDHA1/DLAT/HACD2/ACACA	11
BP	GO:0045830	positive regulation of isotype switching	8/2099	28/18800	0.0095271	0.0563079	0.0469157	RIF1/MSH2/EXOSC3/NSD2/MAD2L2/PAXIP1/ATAD5/HMCES	8
BP	GO:0009116	nucleoside metabolic process	14/2099	64/18800	0.00988754	0.0583684	0.0486325	ERH/NUDT1/UMPS/AMD1/PPAT/ATIC/PRPSAP2/PRPS1/ADK/HPRT1/TK1/DTYMK/UCKL1/PNP	14
BP	GO:0009133	nucleoside diphosphate biosynthetic process	5/2099	13/18800	0.0102849	0.0603533	0.0502864	AK2/CAD/DHODH/UMPS/DTYMK	5
BP	GO:0018206	peptidyl-methionine modification	5/2099	13/18800	0.0102849	0.0603533	0.0502864	METAP2/NAA35/NAA30/NAA15/NAA20	5
BP	GO:0033262	regulation of nuclear cell cycle DNA replication	5/2099	13/18800	0.0102849	0.0603533	0.0502864	DBF4/TIPIN/CDC7/DBF4B/CDT1	5
BP	GO:0043247	telomere maintenance in response to DNA damage	5/2099	13/18800	0.0102849	0.0603533	0.0502864	XRCC1/RIF1/APEX1/DCLRE1B/DCLRE1A	5
BP	GO:0072710	response to hydroxyurea	5/2099	13/18800	0.0102849	0.0603533	0.0502864	DDX11/RTF2/RAD51/TIMELESS/BLM	5
BP	GO:2000780	negative regulation of double-strand break repair	9/2099	34/18800	0.0103877	0.0608845	0.0507289	POLQ/RIF1/MAD2L2/AUNIP/UBQLN4/OTUB1/FANCB/HSF1/PARPBP	9
BP	GO:0009220	pyrimidine ribonucleotide biosynthetic process	7/2099	23/18800	0.01044	0.0610463	0.0508638	CAD/DHODH/UMPS/UCK2/CTPS1/UCKL1/NME1	7
BP	GO:1901984	negative regulation of protein acetylation	7/2099	23/18800	0.01044	0.0610463	0.0508638	BRCA1/PIH1D1/PARK7/SET/TAF7/NOC2L/HDAC2	7
BP	GO:0006488	dolichol-linked oligosaccharide biosynthetic process	6/2099	18/18800	0.010893	0.0633203	0.0527584	ALG1/MPDU1/ALG8/RFT1/DPAGT1/ALG3	6
BP	GO:0033151	V(D)J recombination	6/2099	18/18800	0.010893	0.0633203	0.0527584	TCF3/YY1/XRCC4/HMGB2/HMGB1/PRKDC	6
BP	GO:0034244	negative regulation of transcription elongation from RNA polymerase II promoter	6/2099	18/18800	0.010893	0.0633203	0.0527584	NELFCD/AXIN1/EZH2/RNF8/HNRNPU/NELFE	6
BP	GO:0042772	DNA damage response, signal transduction resulting in transcription	6/2099	18/18800	0.010893	0.0633203	0.0527584	TFAP4/FOXM1/MAD2L2/BRCA2/COPS3/CHEK2	6
BP	GO:0051782	negative regulation of cell division	6/2099	18/18800	0.010893	0.0633203	0.0527584	ASPM/ORC6/MYC/E2F7/AURKB/BLM	6
BP	GO:0009185	ribonucleoside diphosphate metabolic process	21/2099	112/18800	0.0117862	0.068432	0.0570175	AK2/ENO1/CAD/PGK1/DHODH/GPI/OGDH/GIT1/GAPDH/TPI1/UMPS/LDHA/MYC/FOXK2/PFKM/NUDT5/RRM1/PGAM1/RRM2/PRKAG1/EIF6	21
BP	GO:0009264	deoxyribonucleotide catabolic process	8/2099	29/18800	0.0118963	0.0688285	0.057348	NTHL1/UNG/DUT/MBD4/NUDT15/TDG/DCTPP1/PNP	8
BP	GO:0030970	retrograde protein transport, ER to cytosol	8/2099	29/18800	0.0118963	0.0688285	0.057348	UFD1/EDEM2/HM13/AUP1/DERL1/VCP/HSP90B1/NPLOC4	8
BP	GO:1903513	endoplasmic reticulum to cytosol transport	8/2099	29/18800	0.0118963	0.0688285	0.057348	UFD1/EDEM2/HM13/AUP1/DERL1/VCP/HSP90B1/NPLOC4	8
BP	GO:0006334	nucleosome assembly	23/2099	126/18800	0.0119282	0.0689324	0.0574345	MCM2/SART3/OIP5/CHRAC1/ASF1B/GRWD1/MACROH2A1/SET/HJURP/NASP/ANP32B/POLE3/MIS18A/CHAF1B/HMGB2/CHAF1A/NPM1/NAP1L1/CENPP/H2AX/CENPW/DAXX/DNAJC9	23
BP	GO:0009166	nucleotide catabolic process	15/2099	72/18800	0.0121752	0.0702778	0.0585555	NTHL1/ACAT1/UNG/ACOT7/ITPA/DUT/MBD4/NUDT15/TDG/VCP/HPRT1/HINT1/DCTPP1/FITM2/PNP	15
BP	GO:0032436	positive regulation of proteasomal ubiquitin-dependent protein catabolic process	18/2099	92/18800	0.0123386	0.0711375	0.0592718	KEAP1/AURKA/TRIB3/PSMD10/AXIN1/SGTA/FZR1/USP5/SUMO1/CDC20/HSPBP1/UBQLN1/BBS7/VCP/PLK1/RAD23A/SUMO2/DDRGK1	18
BP	GO:0007129	homologous chromosome pairing at meiosis	12/2099	53/18800	0.0124049	0.0714364	0.0595208	MRE11/NDC1/TRIP13/CCNB1IP1/CCNE1/PSMC3IP/BRIP1/FANCD2/RAD21/CCNE2/EHMT2/BAG6	12
BP	GO:0006779	porphyrin-containing compound biosynthetic process	9/2099	35/18800	0.0126303	0.0724813	0.0603914	COX10/SLC25A39/FECH/CPOX/SRRD/ABCB7/ABCB10/IBA57/HMBS	9
BP	GO:0033014	tetrapyrrole biosynthetic process	9/2099	35/18800	0.0126303	0.0724813	0.0603914	COX10/SLC25A39/FECH/CPOX/SRRD/ABCB7/ABCB10/IBA57/HMBS	9
BP	GO:1904031	positive regulation of cyclin-dependent protein kinase activity	9/2099	35/18800	0.0126303	0.0724813	0.0603914	MNAT1/CDC6/HSP90AB1/PSMD10/CKS2/CCNB1/PSRC1/CKS1B/CDK5R1	9
BP	GO:1990830	cellular response to leukemia inhibitory factor	19/2099	99/18800	0.0126464	0.0724892	0.060398	SLC25A5/XRCC5/RIF1/PMM1/MYBL2/RPS16/POLR1F/SRSF3/PDCD10/NCL/SRSF7/CACYBP/SRM/HELLS/MRPL15/HNRNPU/NUP35/UBXN2A/SHMT1	19
BP	GO:0006090	pyruvate metabolic process	20/2099	106/18800	0.0128617	0.0736382	0.0613554	ENO1/DLD/PGK1/GPI/OGDH/GIT1/PDHX/GAPDH/TPI1/PDHA1/LDHA/MYC/FOXK2/DLAT/PFKM/PGAM1/PC/PRKAG1/VDAC1/EIF6	20
BP	GO:0033013	tetrapyrrole metabolic process	14/2099	66/18800	0.012955	0.0740866	0.061729	COX10/SLC25A39/FECH/CPOX/EIF2AK1/SRRD/ABCB7/MMACHC/ABCB10/MMAB/CD320/MMADHC/IBA57/HMBS	14
BP	GO:0043467	regulation of generation of precursor metabolites and energy	24/2099	134/18800	0.013029	0.0744232	0.0620094	NOA1/AKT2/CHCHD2/GIT1/COX7A2L/PARK7/TRAP1/CCNB1/TACO1/MYC/KHK/PNPT1/VCP/GHITM/PRELID1/CDK1/PGAM1/SLC25A33/PPP1CA/PRKAG1/SHMT2/NDUFA4/PHB2/EIF6	24
BP	GO:0006541	glutamine metabolic process	7/2099	24/18800	0.0133474	0.0759788	0.0633055	CAD/NIT2/PPAT/ASNSD1/GMPS/CTPS1/PFAS	7
BP	GO:0035561	regulation of chromatin binding	7/2099	24/18800	0.0133474	0.0759788	0.0633055	KDM1A/DDX11/GMNN/TDG/MEPCE/CDT1/KDM4D	7
BP	GO:0070935	3'-UTR-mediated mRNA stabilization	7/2099	24/18800	0.0133474	0.0759788	0.0633055	ELAVL1/HNRNPC/TARDBP/TENT4B/METTL16/HNRNPA0/RBM10	7
BP	GO:0051259	protein complex oligomerization	39/2099	244/18800	0.0135316	0.0769387	0.0641053	POLQ/ELAVL1/JMJD6/HSD17B10/FUS/SSBP1/TWNK/ASIC1/CPSF6/ECT2/FARSB/ATL2/PRMT1/YME1L1/PNPT1/RBMX/SIGMAR1/CPSF7/OXA1L/WDCP/STOML2/HPRT1/NUDT21/RRM1/TK1/KCTD5/LETM1/TRMT61B/RRM2/TMEM70/SHMT1/BEND3/FARSA/SHMT2/TMEM120B/ZNF777/BLM/OPA1/ACACA	39
BP	GO:1990823	response to leukemia inhibitory factor	19/2099	100/18800	0.0140259	0.0796572	0.0663704	SLC25A5/XRCC5/RIF1/PMM1/MYBL2/RPS16/POLR1F/SRSF3/PDCD10/NCL/SRSF7/CACYBP/SRM/HELLS/MRPL15/HNRNPU/NUP35/UBXN2A/SHMT1	19
BP	GO:0045814	negative regulation of gene expression, epigenetic	16/2099	80/18800	0.0144358	0.0815665	0.0679612	KDM1A/RIF1/SUV39H1/AXIN1/EZH2/MACROH2A1/HDAC1/HELLS/CBX3/TRIM28/DNMT1/MORC2/SMYD5/POLE3/BEND3/CTR9	16
BP	GO:0006490	oligosaccharide-lipid intermediate biosynthetic process	6/2099	19/18800	0.0144446	0.0815665	0.0679612	ALG1/MPDU1/ALG8/RFT1/DPAGT1/ALG3	6
BP	GO:0009223	pyrimidine deoxyribonucleotide catabolic process	6/2099	19/18800	0.0144446	0.0815665	0.0679612	NTHL1/UNG/DUT/MBD4/TDG/DCTPP1	6
BP	GO:2000042	negative regulation of double-strand break repair via homologous recombination	6/2099	19/18800	0.0144446	0.0815665	0.0679612	POLQ/RIF1/MAD2L2/UBQLN4/FANCB/PARPBP	6
BP	GO:2000757	negative regulation of peptidyl-lysine acetylation	6/2099	19/18800	0.0144446	0.0815665	0.0679612	BRCA1/PIH1D1/SET/TAF7/NOC2L/HDAC2	6
BP	GO:0006596	polyamine biosynthetic process	5/2099	14/18800	0.01455	0.0816024	0.0679911	SMS/ODC1/SRM/AMD1/AZIN1	5
BP	GO:0035563	positive regulation of chromatin binding	5/2099	14/18800	0.01455	0.0816024	0.0679911	KDM1A/DDX11/GMNN/CDT1/KDM4D	5
BP	GO:0043922	negative regulation by host of viral transcription	5/2099	14/18800	0.01455	0.0816024	0.0679911	TFAP4/HDAC1/TARDBP/ZNF639/PSMC3	5
BP	GO:0098760	response to interleukin-7	5/2099	14/18800	0.01455	0.0816024	0.0679911	YBX1/ATP5F1B/ATIC/HDGF/STIP1	5
BP	GO:0098761	cellular response to interleukin-7	5/2099	14/18800	0.01455	0.0816024	0.0679911	YBX1/ATP5F1B/ATIC/HDGF/STIP1	5
BP	GO:1903894	regulation of IRE1-mediated unfolded protein response	5/2099	14/18800	0.01455	0.0816024	0.0679911	HSPA5/BFAR/COPS5/PTPN1/DDRGK1	5
BP	GO:0006734	NADH metabolic process	8/2099	30/18800	0.0146714	0.082004	0.0683257	MDH1/ENO1/IDH3B/OGDH/FOXK2/MDH2/PFKM/VCP	8
BP	GO:0031365	N-terminal protein amino acid modification	8/2099	30/18800	0.0146714	0.082004	0.0683257	METAP2/NAA50/NAA35/NMT1/NAA30/NTMT1/NAA15/NAA20	8
BP	GO:0046386	deoxyribose phosphate catabolic process	8/2099	30/18800	0.0146714	0.082004	0.0683257	NTHL1/UNG/DUT/MBD4/NUDT15/TDG/DCTPP1/PNP	8
BP	GO:0034599	cellular response to oxidative stress	44/2099	284/18800	0.0154776	0.0864122	0.0719987	VRK2/TMEM161A/KEAP1/APEX1/BRF2/CHCHD2/EZH2/CAMKK2/PDCD10/ECT2/HTRA2/STK25/PARK7/SFPQ/PRDX1/STAU1/TRAP1/PCNA/OSER1/EIF2S1/UBQLN1/PNPT1/SOD1/PARP1/FANCD2/NONO/SIGMAR1/RPS3/AIFM1/FANCC/ATP13A2/TBC1D24/MELK/BAG5/PRDX2/CDK1/ZNF622/HSF1/PPIA/LONP1/HDAC2/VKORC1L1/CHUK/DHFR	44
BP	GO:1902115	regulation of organelle assembly	33/2099	202/18800	0.016154	0.090087	0.0750605	BRCA1/PHF23/MPHOSPH9/GDI2/SPAG5/VDAC3/CHMP4B/CEP76/WRAP73/GPSM2/STIL/ODF2/PLK4/ATG3/G3BP1/TBC1D7/CENPJ/HNRNPU/CCSAP/SASS6/KIF15/ENTR1/PLK1/CNTROB/RAB1B/SMCR8/NPM1/DRG1/KIF24/DYNC1H1/EHMT2/NUP62/RBM14	33
BP	GO:1904951	positive regulation of establishment of protein localization	47/2099	309/18800	0.0173403	0.0965936	0.0804818	USP36/IPO5/AACS/RBM22/HUWE1/EDEM2/HSP90AB1/MIEF1/TM9SF4/EMD/ZFAND1/PDCD5/AKT2/YWHAE/ZPR1/PDCD10/ECT2/HTRA2/CCT4/TCP1/TARDBP/ERGIC3/TRIM28/DKC1/RAN/CCT7/NMT1/ANP32B/KIF20B/WRAP53/SAE1/CCT6A/CCT5/CENPJ/PFKM/TOMM70/CCT8/ATP13A2/PCNT/CCT3/CCT2/CDK1/PPID/HDAC3/CDK5R1/UBE2L3/PPIA	47
BP	GO:0016032	viral process	61/2099	418/18800	0.017464	0.0971731	0.0809647	VTA1/PTBP1/TAF11/PVR/ITCH/EDEM2/TFAP4/TYRO3/SRPK1/HSP90AB1/SMARCB1/EIF3L/EIF3D/SNW1/CHMP4B/HTATSF1/EIF3B/EIF3A/HSPA8/HDAC1/TARDBP/ZNF639/VAPB/STAU1/NUP153/DEK/PRMT1/CANX/SMARCA4/ILF3/TRIM28/EIF3G/TOP2A/RAN/MORC2/DHX9/SSB/TARBP2/DENR/LARP1/RRP1B/MGAT4B/VCP/PSMC3/DDB1/SLC3A2/CDK1/PPID/PPIH/HCFC1/PC/RAB1B/BANF1/EIF3F/RAD23A/RCC1/KPNA2/SLC52A2/PPIA/CNOT7/TRIM59	61
BP	GO:0045737	positive regulation of cyclin-dependent protein serine/threonine kinase activity	8/2099	31/18800	0.0178879	0.0993082	0.0827436	MNAT1/CDC6/PSMD10/CKS2/CCNB1/PSRC1/CKS1B/CDK5R1	8
BP	GO:0140718	facultative heterochromatin assembly	8/2099	31/18800	0.0178879	0.0993082	0.0827436	KDM1A/SUV39H1/HDAC1/HELLS/TRIM28/DNMT1/MORC2/BEND3	8
CC	GO:0098687	chromosomal region	170/2178	366/19594	2.0284e-66	1.36511e-63	8.75414e-64	KDM1A/UPF1/PAFAH1B1/ZNF207/NCAPD2/MRE11/NUP160/SPDL1/RAD51/THOC3/POLD1/NUP133/SMC1A/NDE1/XRCC1/MCM2/NUP37/MCM6/SPAG5/XRCC5/KIF22/RIF1/NDC80/XPO1/SEH1L/ORC1/ZW10/DYNLL1/BIRC5/TOX4/MSH2/CENPM/THOC5/MCM5/RANGAP1/APEX1/CHMP4B/SUV39H1/RBBP7/CENPI/OIP5/MCM4/DOT1L/EZH2/SMC3/CBX1/GAR1/NCAPG/NUP98/PTGES3/RAD51AP1/NUP107/MCM3/RNF8/TTK/PPP2CA/MACROH2A1/SMC4/CENPA/NEK2/CENPF/STAG1/DCLRE1B/HELLS/CENPL/KIF18A/…	170
CC	GO:0005759	mitochondrial matrix	173/2178	473/19594	3.05273e-49	1.02724e-46	6.58747e-47	POLDIP2/NDUFAB1/SLC25A5/ELAC2/LARS2/NDUFS1/MIPEP/MRPS10/RAD51/MRPS35/CS/KARS1/MTHFD2/FECH/IARS2/COASY/HSD17B10/ACAT1/EXD2/MRPL22/HADHA/DIMT1/MRPS33/DLD/FH/MRPS18A/MCAT/ACO2/MTG2/IDH3B/EARS2/DNAJA3/TIMM44/MRPL4/GCDH/OGDH/SSBP1/GARS1/NUDT1/MRPL32/TWNK/TFAM/C1QBP/LRRC59/GRPEL1/PDHX/ATP5F1B/MRPL51/MRPL18/MRPS30/HSPA9/MRPS27/PCCB/MRPL3/MRPL19/MRPL37/PARK7/ATP5PB/DARS2/FASTKD2/DLST/MTHFD1L/MRPS14/MRPS2…	173
CC	GO:0030684	preribosome	64/2178	78/19594	8.00709e-48	1.79626e-45	1.1519e-45	LAS1L/UTP18/MRTO4/NOP58/RIOK2/WDR3/RRP15/XRCC5/NOP14/PES1/SNU13/NOP56/FBL/FTSJ3/UTP6/BYSL/RRP9/NOL10/RPF1/EBNA1BP2/UTP25/HEATR1/FCF1/UTP20/RRP36/RIOK1/EMG1/KRI1/NGDN/FBXW9/UTP3/NIP7/WDR74/WDR36/LTV1/IMP4/WDR12/UTP4/NOB1/UTP23/PDCD11/SRFBP1/UTP14A/RRP1B/RRP1/NSA2/DCAF13/NOL6/BMS1/TSR1/RSL1D1/RPS7/ZNF622/RRS1/UTP11/TBL3/NOC4L/NOC2L/RRP7A/NOP9/WDR46/EIF6/PRKDC/BOP1	64
CC	GO:0005743	mitochondrial inner membrane	170/2178	491/19594	1.20898e-44	2.03412e-42	1.30443e-42	NDUFAB1/SLC25A13/HCCS/SLC25A5/AGK/COX10/DNAJC11/SLC25A39/NDUFS1/MRPS10/MCUR1/ALDH18A1/MRPS35/FECH/TIMM21/SLC25A3/CPOX/MRPL22/NOA1/HADHA/L2HGDH/MRPS33/MRPS18A/TIMM13/SAMM50/TIMM9/UQCC1/MTG2/SLC25A15/DHODH/TIMM44/TIMM50/MRPL4/PMPCB/CHCHD3/MRPL32/COA1/SLC25A11/GRPEL1/MTCH2/FOXRED1/PTPMT1/ATP5F1B/MRPL51/MRPL18/MRPS30/HSPA9/MRPS27/TIMMDC1/MRPL3/MRPL19/COX7A2L/MRPL37/ATP5PB/SDHB/MRPS14/MRPS2/NDUFAF4/MR…	170
CC	GO:0005819	spindle	149/2178	402/19594	2.89907e-43	3.90215e-41	2.50235e-41	POLDIP2/CDC27/SLC25A5/PAFAH1B1/ZNF207/DDX11/TACC3/NSUN2/SPDL1/ASPM/KIF2A/SMC1A/HMMR/NDE1/WDR62/SPAG5/KIF22/RIF1/AGBL5/ZW10/RTRAF/AURKA/TPX2/DYNLL1/ANAPC5/BIRC5/NUDC/KIF4A/CDC6/AAAS/CDC7/TTLL12/RANGAP1/CEP128/VRK1/RAE1/CDC25B/KIF3B/MAPRE1/CHMP4B/FAM83D/EMD/PYCR3/ERCC2/BCCIP/SMC3/GIT1/CBX1/PRPF19/FBXO5/TTK/KIF20A/IK/PPP2CA/TBCCD1/ECT2/TTL/WRAP73/MAD2L2/TMEM9/CDC20/NEK2/CENPF/STAG1/KIF14/CEP89/KIF18…	149
CC	GO:0000775	chromosome, centromeric region	107/2178	227/19594	9.43383e-43	1.05816e-40	6.78574e-41	PAFAH1B1/ZNF207/NCAPD2/NUP160/SPDL1/NUP133/SMC1A/NDE1/NUP37/SPAG5/KIF22/NDC80/XPO1/SEH1L/ZW10/DYNLL1/BIRC5/CENPM/RANGAP1/CHMP4B/SUV39H1/CENPI/OIP5/EZH2/SMC3/CBX1/NCAPG/NUP98/NUP107/TTK/PPP2CA/MACROH2A1/SMC4/CENPA/NEK2/CENPF/STAG1/HELLS/CENPL/KIF18A/CBX3/ZWINT/CENPK/HJURP/NUP85/KNSTRN/NGDN/MIS18BP1/SGO1/DNMT1/TOP2A/CCNB1/CDCA8/DSCC1/DCTN3/KNL1/CENPO/CENPE/KIF2C/NUF2/DYNC1LI1/BOD1/CDCA5/INCENP/DSN1…	107
CC	GO:0005681	spliceosomal complex	98/2178	194/19594	1.36607e-42	1.31338e-40	8.42239e-41	UPF1/MTREX/SNRNP40/U2AF2/YBX1/DHX8/GPKOW/CLNS1A/SNRPA/WBP11/RBM22/SF3B2/HNRNPC/GEMIN2/CWF19L1/CDC5L/HNRNPM/SF3A1/SNRPD3/SNU13/PHF5A/SNW1/PRPF6/CRNKL1/DHX35/HTATSF1/PRPF31/SUGP1/BUD31/RBM28/LSM5/CASC3/EFTUD2/FRG1/DHX15/HSPA8/PRPF19/MAGOHB/IK/NCL/SF3B6/BCAS2/TTF2/PPP1R8/SMNDC1/HNRNPA2B1/SMU1/SNRPC/SNRPD2/SNRPB/SNRPB2/HNRNPR/RALY/LSM4/AAR2/SNRPA1/CTNNBL1/PRPF38A/SYNCRIP/HNRNPA1/SRSF1/TRA2B/PRPF4/PPI…	98
CC	GO:0098798	mitochondrial protein-containing complex	119/2178	281/19594	1.63351e-41	1.37419e-39	8.81237e-40	NDUFAB1/SLC25A5/AGK/DNAJC11/NDUFS1/MRPS10/MRPS35/HSD17B10/TIMM21/MRPL22/HADHA/MRPS33/DLD/MRPS18A/TIMM13/TOMM22/SAMM50/TIMM9/IDH3B/TIMM50/MRPL4/CHCHD3/MRPL32/GRPEL1/FOXRED1/PDHX/ATP5F1B/MRPL51/MRPL18/MRPS30/HSPA9/MRPS27/MRPL3/MRPL19/COX7A2L/MRPL37/ATP5PB/SDHB/MRPS14/MRPS2/MRPS7/MRPS26/TIMM8A/MRPS12/TOMM40/PDHA1/IMMT/MRPL35/DAP3/TIMM17A/TIMM10/MRPL44/MRPS9/NDUFB5/MRPL47/MRPL15/PNPT1/POLG/AFG3L2/TIM…	119
CC	GO:0000793	condensed chromosome	112/2178	255/19594	5.58961e-41	4.17979e-39	2.6804e-39	PAFAH1B1/BAZ1B/ZNF207/NCAPD2/BRCA1/NUP160/SPDL1/RAD51/NUP133/SMC1A/NDE1/NUP37/SPAG5/KIF22/RIF1/NDC80/XPO1/SEH1L/ZW10/DYNLL1/BIRC5/CENPM/RANGAP1/CCNB1IP1/CHMP4B/SUV39H1/CENPI/SMC3/NCAPG/NUP98/NUP107/TTK/RAD1/MACROH2A1/CENPA/NEK2/CENPF/STAG1/KIF18A/CBX3/ZWINT/CENPK/HJURP/NUP85/KNSTRN/SGO1/TUBG1/PSMC3IP/TOP2A/CCNB1/SMC2/DCTN3/KNL1/CENPO/LRPPRC/CENPE/BRCA2/KIF2C/NUF2/FANCD2/DYNC1LI1/BOD1/MKI67/INCENP…	112
CC	GO:0000779	condensed chromosome, centromeric region	80/2178	156/19594	1.3819e-35	9.30022e-34	5.96401e-34	PAFAH1B1/ZNF207/NCAPD2/NUP160/SPDL1/NUP133/SMC1A/NDE1/NUP37/SPAG5/KIF22/NDC80/XPO1/SEH1L/ZW10/DYNLL1/BIRC5/CENPM/RANGAP1/CHMP4B/CENPI/NCAPG/NUP98/NUP107/TTK/CENPA/NEK2/CENPF/KIF18A/CBX3/ZWINT/CENPK/HJURP/NUP85/KNSTRN/SGO1/CCNB1/DCTN3/KNL1/CENPO/CENPE/KIF2C/NUF2/DYNC1LI1/BOD1/INCENP/DSN1/NCAPD3/CENPU/GPATCH11/SPC25/CENPH/HNRNPU/AHCTF1/SKA1/BUB1B/LRWD1/SPC24/SGO2/MAD2L1/SKA3/CENPN/PLK1/CDT1/BUB1/CE…	80
CC	GO:0000776	kinetochore	76/2178	146/19594	1.88559e-34	1.15364e-32	7.398e-33	PAFAH1B1/ZNF207/NUP160/SPDL1/NUP133/SMC1A/NDE1/NUP37/SPAG5/KIF22/NDC80/XPO1/SEH1L/ZW10/DYNLL1/BIRC5/CENPM/RANGAP1/CHMP4B/CENPI/NUP98/NUP107/TTK/CENPA/NEK2/CENPF/KIF18A/ZWINT/CENPK/HJURP/NUP85/KNSTRN/SGO1/CCNB1/DCTN3/KNL1/CENPO/CENPE/KIF2C/NUF2/DYNC1LI1/BOD1/INCENP/DSN1/CENPU/GPATCH11/SPC25/CENPH/HNRNPU/AHCTF1/SKA1/BUB1B/LRWD1/SPC24/SGO2/MAD2L1/SKA3/CENPN/PLK1/CDT1/BUB1/CENPX/NUDCD2/MTBP/ZWILCH/DC…	76
CC	GO:0000228	nuclear chromosome	93/2178	228/19594	4.02795e-31	2.25901e-29	1.44865e-29	BAZ1B/NCAPD2/BRCA1/RAD51/POLD1/MCM10/SMC1A/MCM2/ACTR6/TIPIN/MCM6/POLD3/NUFIP1/ORC1/BIRC5/ORC6/CDC45/SMARCB1/MCM5/POLE2/YY1/CCNB1IP1/BRMS1L/GINS1/CSNK2A1/ACTR5/POLA1/SUV39H1/CHRAC1/MCM4/RPA3/POLD2/SMC3/TIMELESS/CPSF6/MCM3/IK/RAD1/MACROH2A1/HDAC1/UCHL5/NEK2/ZRANB3/EXOSC9/GINS2/TUBG1/PSMC3IP/TOP2A/RPA1/FIGNL1/PCNA/ORC3/DHX9/ACTL6A/SAP130/SMC2/LRPPRC/SMARCAL1/SINHCAF/BRCA2/ANP32E/PRIM2/MMS22L/GINS4/P…	93
CC	GO:0000313	organellar ribosome	52/2178	81/19594	4.36306e-30	2.09739e-28	1.345e-28	MRPS10/MRPS35/MRPL22/MRPS33/MRPS18A/MTG2/MRPL4/MRPL32/MRPL51/MRPL18/MRPS30/MRPS27/MRPL3/MRPL19/MRPL37/MRPS14/MRPS2/MRPS7/MRPS26/MRPS12/MRPL35/DAP3/MRPL44/MRPS9/MRPL47/MRPL15/MRPL9/MRPS5/MRPS28/MRPL49/MRPL39/MRPL17/MRPL10/MRPL16/MRPL58/MRPL36/MRPL13/MRPL52/MRPL11/MRPS22/MRPL48/MRPL14/MRPS11/MRPS16/MRPL30/MRPL21/MRPS18B/MRPS17/MRPL20/MRPL33/MPV17L2/MRPL45	52
CC	GO:0005761	mitochondrial ribosome	52/2178	81/19594	4.36306e-30	2.09739e-28	1.345e-28	MRPS10/MRPS35/MRPL22/MRPS33/MRPS18A/MTG2/MRPL4/MRPL32/MRPL51/MRPL18/MRPS30/MRPS27/MRPL3/MRPL19/MRPL37/MRPS14/MRPS2/MRPS7/MRPS26/MRPS12/MRPL35/DAP3/MRPL44/MRPS9/MRPL47/MRPL15/MRPL9/MRPS5/MRPS28/MRPL49/MRPL39/MRPL17/MRPL10/MRPL16/MRPL58/MRPL36/MRPL13/MRPL52/MRPL11/MRPS22/MRPL48/MRPL14/MRPS11/MRPS16/MRPL30/MRPL21/MRPS18B/MRPS17/MRPL20/MRPL33/MPV17L2/MRPL45	52
CC	GO:0005840	ribosome	90/2178	229/19594	1.03163e-28	4.6286e-27	2.96821e-27	RPL26L1/MRPS10/MRPS35/MRPL22/RPS5/GCN1/RPLP0/MRPS33/MRPS18A/APEX1/MTG2/RPS16/MRPL4/MRPL32/MRPL51/MRPL18/RPS12/MRPS30/MRPS27/MRPL3/MRPL19/MRPL37/MRPS14/ZCCHC17/MRPS2/RPL5/MRPS7/MRPS26/CANX/MRPS12/FXR2/RPL27/MRPL35/DAP3/DHX9/MRPL44/MRPS9/MRPL47/MRPL15/RSL24D1/PNPT1/MRPL9/RPS27A/MRPS5/EIF2A/BTF3/RPL7L1/MRPS28/RPL7/EIF3H/RPS3/MRPL49/MRPL39/LARP1/MRPL17/MRPL10/RPL8/MRPL16/MRPL58/SRP68/SF1/MRPL1/MRPL36…	90
CC	GO:0071013	catalytic step 2 spliceosome	53/2178	88/19594	1.24565e-28	5.23952e-27	3.35998e-27	MTREX/SNRNP40/DHX8/RBM22/SF3B2/HNRNPC/CDC5L/HNRNPM/SF3A1/SNRPD3/SNW1/PRPF6/CRNKL1/DHX35/BUD31/EFTUD2/FRG1/PRPF19/MAGOHB/SF3B6/BCAS2/HNRNPA2B1/SNRPD2/SNRPB/SNRPB2/HNRNPR/RALY/SNRPA1/SYNCRIP/HNRNPA1/SRSF1/PPIL1/SNRPF/EIF4A3/SNRPG/SNRNP200/RBMX/CWC27/HNRNPU/MAGOH/HNRNPK/SNRPD1/HNRNPA3/PRPF8/DDX23/SART1/SNRPE/DDX41/SF3A3/ALYREF/SF3B3/LSM2/RBM8A	53
CC	GO:0005684	U2-type spliceosomal complex	54/2178	92/19594	2.36915e-28	9.37907e-27	6.01457e-27	SNRNP40/U2AF2/DHX8/RBM22/SF3B2/CDC5L/SF3A1/SNRPD3/SNU13/PHF5A/SNW1/PRPF6/CRNKL1/HTATSF1/PRPF31/BUD31/LSM5/CASC3/EFTUD2/PRPF19/MAGOHB/IK/SF3B6/BCAS2/SMU1/SNRPC/SNRPD2/SNRPB/SNRPB2/LSM4/SNRPA1/PRPF38A/PRPF4/PPIL1/BUD13/SNRPF/MFAP1/EIF4A3/TXNL4A/SNRPG/SNRNP200/ZMAT2/CWC27/SNRPD1/SF3B5/PRPF8/SART1/SNRPE/SF3A3/SF3B3/PRPF40A/LSM2/DHX16/RBM8A	54
CC	GO:0044391	ribosomal subunit	77/2178	178/19594	5.42593e-28	2.02869e-26	1.30095e-26	RPL26L1/MRPS10/MRPS35/MRPL22/RPS5/RPLP0/MRPS33/MRPS18A/RPS16/MRPL4/MRPL32/MRPL51/MRPL18/RPS12/MRPS30/MRPS27/MRPL3/MRPL19/MRPL37/MRPS14/ZCCHC17/MRPS2/RPL5/MRPS7/MRPS26/MRPS12/FXR2/RPL27/MRPL35/DAP3/MRPL44/MRPS9/MRPL47/MRPL15/MRPL9/RPS27A/MRPS5/EIF2A/RPL7L1/MRPS28/RPL7/RPS3/MRPL49/MRPL39/MRPL17/MRPL10/RPL8/MRPL16/MRPL58/MRPL1/MRPL36/RPS21/RPS7/MRPL13/MRPL52/MRPL11/MRPS22/MRPL48/MRPL14/MRPS11/MRPS16…	77
CC	GO:0000781	chromosome, telomeric region	71/2178	166/19594	1.50639e-25	5.3358e-24	3.42172e-24	KDM1A/UPF1/MRE11/RAD51/THOC3/POLD1/XRCC1/MCM2/MCM6/XRCC5/RIF1/ORC1/TOX4/MSH2/THOC5/MCM5/APEX1/RBBP7/MCM4/DOT1L/EZH2/CBX1/GAR1/PTGES3/RAD51AP1/MCM3/RNF8/MACROH2A1/DCLRE1B/CBX3/HNRNPA2B1/WRNIP1/HAT1/RPA1/PCNA/MEN1/ORC3/NAT10/DNA2/SSB/NABP2/BRCA2/PIF1/WRAP53/PARP1/NHP2/TERF1/MTA2/CHEK1/RAD17/NSMCE2/RECQL4/LRWD1/DPY30/SMC6/ORC5/MCM7/DDB1/FEN1/CDK1/PPP1CA/ALYREF/CHEK2/RAD51D/PPP1CC/H2AX/XRCC6/HDAC2/BL…	71
CC	GO:0032040	small-subunit processome	32/2178	39/19594	1.68521e-24	5.67074e-23	3.63651e-23	UTP18/NOP58/WDR3/XRCC5/NOP14/SNU13/NOP56/FBL/UTP6/RRP9/NOL10/UTP25/HEATR1/FCF1/UTP20/EMG1/NGDN/UTP3/WDR36/IMP4/UTP4/UTP23/PDCD11/UTP14A/DCAF13/NOL6/RPS7/UTP11/TBL3/NOC4L/WDR46/PRKDC	32
CC	GO:0072686	mitotic spindle	68/2178	160/19594	2.48546e-24	7.96531e-23	5.10797e-23	POLDIP2/CDC27/TACC3/ASPM/SMC1A/WDR62/SPAG5/KIF22/AGBL5/RTRAF/AURKA/TPX2/DYNLL1/NUDC/CDC6/AAAS/CDC7/RANGAP1/RAE1/MAPRE1/FAM83D/PYCR3/BCCIP/SMC3/GIT1/IK/ECT2/WRAP73/TMEM9/STAG1/KIF18A/GPSM2/KNSTRN/HAUS8/TUBG1/DIAPH1/ESPL1/KIF23/HAUS2/KIF11/KIF20B/CENPE/HAUS6/RPS3/HAUS1/HNRNPU/CCSAP/SKA1/RACGAP1/SMC6/MAD2L1/SKA3/TAF1D/PLK1/CKAP2L/CDK1/NUDCD2/HDAC3/AURKB/RCC2/HSF1/KIF18B/KATNA1/DCTN1/NUP62/KIFC1/HAUS…	68
CC	GO:0000922	spindle pole	70/2178	169/19594	3.30378e-24	1.01065e-22	6.48109e-23	DDX11/TACC3/SPDL1/ASPM/KIF2A/SMC1A/NDE1/WDR62/SPAG5/ZW10/AURKA/TPX2/CDC6/AAAS/CEP128/RAE1/CDC25B/FAM83D/EMD/BCCIP/SMC3/GIT1/IK/PPP2CA/TBCCD1/CDC20/NEK2/CENPF/STAG1/CEP89/GPSM2/DLGAP5/AUNIP/KNSTRN/SGO1/CEP85/HAUS8/TUBG1/CCNB1/PSRC1/CKAP2/ODF2/TUBGCP4/KIF11/KIF20B/NEDD1/KATNB1/PLK4/CALM2/DYNC1LI1/BOD1/HAUS1/HNRNPU/SMC6/TOPBP1/POC1A/MAD2L1/RAD21/PLK1/CKAP2L/NUDCD2/CKAP5/AURKB/NPM1/HSF1/BRCC3/KATNA1/…	70
CC	GO:0071005	U2-type precatalytic spliceosome	36/2178	50/19594	6.73822e-24	1.97166e-22	1.26438e-22	SF3B2/SF3A1/SNRPD3/SNU13/PHF5A/PRPF6/PRPF31/LSM5/EFTUD2/MAGOHB/IK/SMU1/SNRPD2/SNRPB/SNRPB2/LSM4/SNRPA1/PRPF38A/PRPF4/BUD13/SNRPF/MFAP1/TXNL4A/SNRPG/SNRNP200/ZMAT2/CWC27/SNRPD1/SF3B5/PRPF8/SART1/SNRPE/SF3A3/SF3B3/LSM2/DHX16	36
CC	GO:0071011	precatalytic spliceosome	37/2178	53/19594	9.3192e-24	2.61326e-22	1.67582e-22	SF3B2/SF3A1/SNRPD3/SNU13/PHF5A/PRPF6/PRPF31/LSM5/EFTUD2/MAGOHB/IK/SF3B6/SMU1/SNRPD2/SNRPB/SNRPB2/LSM4/SNRPA1/PRPF38A/PRPF4/BUD13/SNRPF/MFAP1/TXNL4A/SNRPG/SNRNP200/ZMAT2/CWC27/SNRPD1/SF3B5/PRPF8/SART1/SNRPE/SF3A3/SF3B3/LSM2/DHX16	37
CC	GO:0061695	transferase complex, transferring phosphorus-containing groups	89/2178	259/19594	1.52489e-23	4.105e-22	2.63244e-22	LAS1L/PAF1/POLR3B/MNAT1/POLD1/TAF2/TAF11/POLR1A/POLD3/XRCC5/POLR2E/POLR2F/POLR3H/POLE2/RPRD1B/POLA1/CHRAC1/ERCC2/CCNE1/POLR1F/TAF6/POLD2/BCCIP/GTF2H3/MCM3/TBP/POLR3G/MAD2L2/POLR1G/ATG101/CKS2/POLR1B/GTF2F1/TAF4/PCNA/POLR3F/CCNB1/CDK7/CDK4/TAF5L/POLR1E/GTF2A2/POLG/PRPSAP2/TAF4B/CALM2/POLR2D/CCNA2/PRIM2/PRPS1/POLE3/PARD3/POLR3A/TAF5/PFKM/GTF2E1/MMS19/CCNB2/PRPSAP1/POLR3K/CCNF/TAF6L/ERCC3/POLR2H/LEO…	89
CC	GO:0034708	methyltransferase complex	49/2178	92/19594	2.89767e-23	7.50051e-22	4.8099e-22	LAS1L/PHF20/METTL1/HSD17B10/CLNS1A/TRMT6/SNRPD3/PRMT5/ERH/CHD8/RBBP7/PRPF31/CBLL1/TAF6/EZH2/RBBP5/RIOK1/SNRPD2/SNRPB/PRMT1/TAF4/MEN1/TEX10/SNRPF/PELP1/SNRPG/BOD1/PAXIP1/WDR4/SENP3/RBM15/DPY30/VIRMA/TRMT61A/SNRPD1/E2F6/TRMT61B/HCFC1/TRMT10C/RUVBL1/SUZ12/TAF7/SNRPE/RUVBL2/MCRS1/WDR5/HDAC2/NCOA6/TAF9	49
CC	GO:0055029	nuclear DNA-directed RNA polymerase complex	50/2178	100/19594	4.26887e-22	1.06406e-20	6.82354e-21	PAF1/POLR3B/MNAT1/TAF2/TAF11/POLR1A/POLR2E/POLR2F/POLR3H/RPRD1B/POLA1/ERCC2/POLR1F/TAF6/GTF2H3/MCM3/TBP/POLR3G/POLR1G/POLR1B/GTF2F1/TAF4/POLR3F/CDK7/TAF5L/POLR1E/GTF2A2/TAF4B/POLR2D/PRIM2/POLR3A/TAF5/GTF2E1/MMS19/POLR3K/TAF6L/ERCC3/POLR2H/LEO1/POLR2G/POLR3D/TAF7/GTF2H2C/POLR3C/TCEA1/GTF2E2/PRIM1/CTR9/CRCP/TAF9	50
CC	GO:0000428	DNA-directed RNA polymerase complex	50/2178	101/19594	7.55167e-22	1.8151e-20	1.16398e-20	PAF1/POLR3B/MNAT1/TAF2/TAF11/POLR1A/POLR2E/POLR2F/POLR3H/RPRD1B/POLA1/ERCC2/POLR1F/TAF6/GTF2H3/MCM3/TBP/POLR3G/POLR1G/POLR1B/GTF2F1/TAF4/POLR3F/CDK7/TAF5L/POLR1E/GTF2A2/TAF4B/POLR2D/PRIM2/POLR3A/TAF5/GTF2E1/MMS19/POLR3K/TAF6L/ERCC3/POLR2H/LEO1/POLR2G/POLR3D/TAF7/GTF2H2C/POLR3C/TCEA1/GTF2E2/PRIM1/CTR9/CRCP/TAF9	50
CC	GO:0005657	replication fork	37/2178	60/19594	6.67355e-21	1.51175e-19	9.69451e-20	BAZ1B/MRE11/RTF2/RFC2/POLD1/MCM10/RAD18/TIPIN/POLD3/POLA1/RPA3/POLD2/RAD51C/RFC5/TIMELESS/MCM3/ZRANB3/DNMT1/RPA1/PCNA/RFC3/SMARCAL1/PIF1/PRIM2/MMS22L/CHEK1/DONSON/TONSL/RFC4/HMCES/RAD51D/H2AX/XRCC2/BLM/PRIM1/WDHD1/UHRF1	37
CC	GO:0030880	RNA polymerase complex	50/2178	105/19594	6.73886e-21	1.51175e-19	9.69451e-20	PAF1/POLR3B/MNAT1/TAF2/TAF11/POLR1A/POLR2E/POLR2F/POLR3H/RPRD1B/POLA1/ERCC2/POLR1F/TAF6/GTF2H3/MCM3/TBP/POLR3G/POLR1G/POLR1B/GTF2F1/TAF4/POLR3F/CDK7/TAF5L/POLR1E/GTF2A2/TAF4B/POLR2D/PRIM2/POLR3A/TAF5/GTF2E1/MMS19/POLR3K/TAF6L/ERCC3/POLR2H/LEO1/POLR2G/POLR3D/TAF7/GTF2H2C/POLR3C/TCEA1/GTF2E2/PRIM1/CTR9/CRCP/TAF9	50
CC	GO:0000502	proteasome complex	36/2178	59/19594	3.76141e-20	8.16591e-19	5.2366e-19	PSMB1/UBE3C/PSMC4/PSMA4/PSME4/PSMD8/PSMC6/PSMA3/PSMC1/PSMB5/PSMA7/USP14/PSMD10/PSMD7/PSMD3/PSMD11/PSMD14/UCHL5/PSMF1/PSMB2/ADRM1/PSME3/UBQLN1/PSMB7/PSMB6/PSMA5/PSMD4/PSMB4/PSMC2/VCP/PSMC3/PSMD1/PSMD2/RAD23A/PSMD13/PSMD12	36
CC	GO:1905369	endopeptidase complex	41/2178	79/19594	3.84215e-19	8.08052e-18	5.18184e-18	PSMB1/UBE3C/PSMC4/PSMA4/PSME4/PIGS/PSMD8/PSMC6/PSMA3/PSMC1/PSMB5/PSMA7/PIGU/USP14/PSMD10/PSMD7/PSMD3/PSMD11/PSMD14/HTRA2/UCHL5/PIGT/PSMF1/PSMB2/ADRM1/PSME3/UBQLN1/PSMB7/PSMB6/PSMA5/PSMD4/PSMB4/PSMC2/VCP/PSMC3/PSMD1/PSMD2/RAD23A/PSMD13/PSMD12/GPAA1	41
CC	GO:0005635	nuclear envelope	122/2178	479/19594	4.43205e-19	9.03869e-18	5.7963e-18	PAFAH1B1/UTP18/PHF20/VRK2/NUP160/RRP12/NDC1/TNPO3/IPO5/WDR3/YBX1/NUP133/ENO1/NUP37/SENP1/RIF1/XPO1/SEH1L/IPO11/SEPHS1/TXLNG/ZC3HC1/TYRO3/NUP50/AAAS/TMEM38B/NUP188/ITPR3/RANBP1/RTCB/RANGAP1/RAE1/CHMP4B/POLA1/EMD/NUP93/FZR1/DNAJC2/NUDT1/GTPBP4/CASC3/KPNB1/NUP88/MLX/LRRC59/NUP98/NUP107/GAPDH/LMNB1/NUP155/BNIP1/SUMO1/CACYBP/CENPF/GTF3C3/GLE1/MRPS14/ENY2/TMPO/CBX3/CSE1L/MAD2L1BP/NUP153/NUP85/PCID2/YEA…	122
CC	GO:1905368	peptidase complex	49/2178	111/19594	9.2361e-19	1.82821e-17	1.17238e-17	PSMB1/UBE3C/PSMC4/PSMA4/PSME4/PIGS/ATXN7L3/PSMD8/PSMC6/PSMA3/PSMC1/PSMB5/PSMA7/PIGU/USP14/PSMD10/PSMD7/TAF6/PSMD3/PSMD11/PSMD14/HTRA2/UCHL5/ENY2/PIGT/PSMF1/PSMB2/ADRM1/PSME3/UBQLN1/TAF5L/PSMB7/AFG3L2/PSMB6/PSMA5/PSMD4/PSMB4/PSMC2/TAF6L/VCP/PSMC3/SEC11C/PSMD1/PSMD2/RAD23A/PSMD13/PSMD12/GPAA1/TAF9	49
CC	GO:0000315	organellar large ribosomal subunit	33/2178	54/19594	1.29523e-18	2.42137e-17	1.55277e-17	MRPL22/MRPS18A/MRPL4/MRPL32/MRPL51/MRPL18/MRPS30/MRPL3/MRPL19/MRPL37/MRPL35/MRPL44/MRPL47/MRPL15/MRPL9/MRPL49/MRPL39/MRPL17/MRPL10/MRPL16/MRPL58/MRPL36/MRPL13/MRPL52/MRPL11/MRPL48/MRPL14/MRPL30/MRPL21/MRPL20/MRPL33/MPV17L2/MRPL45	33
CC	GO:0005762	mitochondrial large ribosomal subunit	33/2178	54/19594	1.29523e-18	2.42137e-17	1.55277e-17	MRPL22/MRPS18A/MRPL4/MRPL32/MRPL51/MRPL18/MRPS30/MRPL3/MRPL19/MRPL37/MRPL35/MRPL44/MRPL47/MRPL15/MRPL9/MRPL49/MRPL39/MRPL17/MRPL10/MRPL16/MRPL58/MRPL36/MRPL13/MRPL52/MRPL11/MRPL48/MRPL14/MRPL30/MRPL21/MRPL20/MRPL33/MPV17L2/MRPL45	33
CC	GO:0015934	large ribosomal subunit	49/2178	112/19594	1.46676e-18	2.66791e-17	1.71087e-17	RPL26L1/MRPL22/RPLP0/MRPS18A/MRPL4/MRPL32/MRPL51/MRPL18/MRPS30/MRPL3/MRPL19/MRPL37/ZCCHC17/RPL5/FXR2/RPL27/MRPL35/MRPL44/MRPL47/MRPL15/MRPL9/RPL7L1/RPL7/MRPL49/MRPL39/MRPL17/MRPL10/RPL8/MRPL16/MRPL58/MRPL1/MRPL36/MRPL13/MRPL52/MRPL11/MRPL48/MRPL14/RPL35A/MRPL30/MRPL21/RPL23A/RPL10A/UBA52/RPL41/MRPL20/MRPL33/MPV17L2/RPL17/MRPL45	49
CC	GO:0120114	Sm-like protein family complex	48/2178	111/19594	5.89174e-18	1.04346e-16	6.69145e-17	STRAP/SNRNP40/DDX20/CLNS1A/SNRPA/GEMIN5/SF3B2/GEMIN2/SF3A1/SNRPD3/SNU13/PHF5A/PRPF6/HTATSF1/PRPF31/LSM5/EFTUD2/SF3B6/SNRPC/SNRPD2/SNRPB/SNRPB2/LSM4/AAR2/SNRPA1/PRPF4/TGS1/SNRPF/TXNL4B/TXNL4A/SNRPG/SNRNP200/ZMAT2/MEPCE/GEMIN6/SNRPD1/USP39/SF3B5/PPIH/PRPF8/DDX23/SART1/GEMIN4/SNRPE/SF3A3/SF3B3/PRPF40A/LSM2	48
CC	GO:0009295	nucleoid	29/2178	44/19594	7.77322e-18	1.30784e-16	8.38689e-17	POLDIP2/SLC25A5/ELAC2/HSD17B10/HADHA/SSBP1/TWNK/TFAM/LRRC59/ATP5F1B/HSPA9/FASTKD2/MTERF1/LRPPRC/DNA2/POLG/SUPV3L1/TFB2M/VDAC2/TEFM/TRMT10C/TUFM/SHMT2/DDX28/TOP1MT/LONP1/ATAD3A/VDAC1/FASTKD5	29
CC	GO:0042645	mitochondrial nucleoid	29/2178	44/19594	7.77322e-18	1.30784e-16	8.38689e-17	POLDIP2/SLC25A5/ELAC2/HSD17B10/HADHA/SSBP1/TWNK/TFAM/LRRC59/ATP5F1B/HSPA9/FASTKD2/MTERF1/LRPPRC/DNA2/POLG/SUPV3L1/TFB2M/VDAC2/TEFM/TRMT10C/TUFM/SHMT2/DDX28/TOP1MT/LONP1/ATAD3A/VDAC1/FASTKD5	29
CC	GO:0030686	90S preribosome	23/2178	29/19594	2.49881e-17	4.1017e-16	2.63032e-16	UTP18/WDR3/NOP14/PES1/UTP6/HEATR1/UTP20/RRP36/KRI1/WDR36/IMP4/WDR12/UTP4/SRFBP1/NOL6/BMS1/RSL1D1/TBL3/NOC4L/NOC2L/RRP7A/NOP9/BOP1	23
CC	GO:0030532	small nuclear ribonucleoprotein complex	42/2178	100/19594	2.43379e-15	3.89985e-14	2.50088e-14	SNRNP40/SNRPA/SF3B2/SF3A1/SNRPD3/SNU13/PHF5A/PRPF6/HTATSF1/PRPF31/LSM5/EFTUD2/SF3B6/SNRPC/SNRPD2/SNRPB/SNRPB2/LSM4/AAR2/SNRPA1/PRPF4/TGS1/SNRPF/TXNL4B/TXNL4A/SNRPG/SNRNP200/ZMAT2/MEPCE/SNRPD1/USP39/SF3B5/PPIH/PRPF8/DDX23/SART1/GEMIN4/SNRPE/SF3A3/SF3B3/PRPF40A/LSM2	42
CC	GO:0030687	preribosome, large subunit precursor	19/2178	23/19594	3.95678e-15	6.19283e-14	3.97131e-14	LAS1L/MRTO4/RRP15/PES1/FTSJ3/RPF1/EBNA1BP2/FBXW9/NIP7/WDR74/WDR12/RRP1B/RRP1/NSA2/ZNF622/RRS1/NOC2L/EIF6/BOP1	19
CC	GO:0097525	spliceosomal snRNP complex	39/2178	90/19594	6.84303e-15	1.04667e-13	6.71206e-14	SNRNP40/SNRPA/SF3B2/SF3A1/SNRPD3/SNU13/PHF5A/PRPF6/HTATSF1/PRPF31/LSM5/EFTUD2/SF3B6/SNRPC/SNRPD2/SNRPB/SNRPB2/LSM4/AAR2/SNRPA1/PRPF4/SNRPF/TXNL4B/TXNL4A/SNRPG/SNRNP200/ZMAT2/SNRPD1/USP39/SF3B5/PPIH/PRPF8/DDX23/SART1/SNRPE/SF3A3/SF3B3/PRPF40A/LSM2	39
CC	GO:0005758	mitochondrial intermembrane space	37/2178	83/19594	1.11701e-14	1.67055e-13	1.07129e-13	AK2/CIAPIN1/AGK/NDUFS1/CPOX/TIMM13/TIMM9/PRELID3B/CHCHD2/HTRA2/PARK7/CEP89/NLN/PANK2/TRAP1/TIMM8A/IMMT/TIMM10/PNPT1/SOD1/TIMM29/HAX1/TIMM8B/AIFM1/CDC25C/CLPB/COA7/CHCHD4/STOML2/PRELID1/TRIAP1/THOP1/CYCS/COA4/SDHAF3/OPA1/TIMM23	37
CC	GO:0016607	nuclear speck	100/2178	411/19594	1.77884e-14	2.60252e-13	1.66894e-13	DNAJC11/SPRTN/MTREX/THOC3/THRAP3/USP36/SNRNP40/U2AF2/PSME4/SART3/KIF22/SF3B2/RBM27/SRPK1/CDC5L/SF3A1/POLDIP3/PHF5A/SNW1/ZC3H14/APEX1/SRP54/PRPF6/CRNKL1/PQBP1/OIP5/TIMM50/PRPF31/CBLL1/CASC3/EFTUD2/DHX15/PRPF19/CPSF6/SRSF9/SRSF3/IK/SMC4/SRSF7/SUMO1/SFPQ/BCAS2/PPP1R8/YLPM1/SMNDC1/SMU1/DDX39A/SNRPB2/MBD4/SNRPA1/NXT1/TOE1/POMP/TAF5L/SRSF1/SAP130/PRPF4/ASCC1/COPS4/UNC45A/EIF4A3/PRCC/POLR2D/DDX46/NCAPG2…	100
CC	GO:0031970	organelle envelope lumen	39/2178	93/19594	2.55422e-14	3.65742e-13	2.34542e-13	AK2/CIAPIN1/AGK/NDUFS1/CPOX/TIMM13/TIMM9/PRELID3B/CHCHD2/HTRA2/CACYBP/PARK7/CEP89/NLN/PANK2/TRAP1/TIMM8A/IMMT/TIMM10/PNPT1/SOD1/TIMM29/HAX1/TIMM8B/AIFM1/CDC25C/CLPB/COA7/CHCHD4/STOML2/PRELID1/TRIAP1/THOP1/CYCS/COA4/TUBB/SDHAF3/OPA1/TIMM23	39
CC	GO:0071007	U2-type catalytic step 2 spliceosome	21/2178	30/19594	4.45413e-14	6.24507e-13	4.00481e-13	SNRNP40/DHX8/RBM22/CDC5L/SNRPD3/SNW1/CRNKL1/BUD31/EFTUD2/PRPF19/BCAS2/SNRPD2/SNRPB/SNRPB2/SNRPA1/PPIL1/SNRPF/SNRPG/SNRPD1/PRPF8/SNRPE	21
CC	GO:0031965	nuclear membrane	79/2178	300/19594	1.24631e-13	1.71177e-12	1.09771e-12	PAFAH1B1/UTP18/PHF20/RRP12/NDC1/WDR3/YBX1/NUP133/ENO1/SENP1/RIF1/XPO1/SEPHS1/TXLNG/ZC3HC1/NUP50/AAAS/TMEM38B/ITPR3/RANGAP1/EMD/NUP93/FZR1/DNAJC2/NUDT1/GTPBP4/CASC3/KPNB1/MLX/NUP98/NUP107/GAPDH/LMNB1/NUP155/SUMO1/GTF3C3/GLE1/MRPS14/CBX3/MAD2L1BP/NUP153/NUP85/YEATS4/CDK4/TEX2/BRIP1/TRA2B/SMPD4/LRPPRC/NUP54/TXNL4A/DTL/HAX1/MTDH/SIGMAR1/EI24/DHX37/TMEM18/AHCTF1/NUP205/RBM15/NUP35/INTS1/QSOX2/NEMP1/DH…	79
CC	GO:0005643	nuclear pore	38/2178	93/19594	1.4825e-13	1.99544e-12	1.27963e-12	NUP160/NDC1/IPO5/NUP133/NUP37/SEH1L/AAAS/NUP188/RANBP1/RANGAP1/RAE1/CHMP4B/NUP93/KPNB1/NUP88/NUP98/NUP107/NUP155/SUMO1/GLE1/ENY2/NUP153/NUP85/PCID2/XPO7/RAN/EIF5A/NXT1/NUP54/CETN3/NUP205/NUP35/MAD2L1/SNUPN/XPOT/IPO7/NUP62/POM121C	38
CC	GO:0000314	organellar small ribosomal subunit	19/2178	26/19594	2.10975e-13	2.7305e-12	1.751e-12	MRPS10/MRPS35/MRPS33/MRPS18A/MRPS27/MRPS14/MRPS2/MRPS7/MRPS26/MRPS12/DAP3/MRPS9/MRPS5/MRPS28/MRPS22/MRPS11/MRPS16/MRPS18B/MRPS17	19
CC	GO:0005763	mitochondrial small ribosomal subunit	19/2178	26/19594	2.10975e-13	2.7305e-12	1.751e-12	MRPS10/MRPS35/MRPS33/MRPS18A/MRPS27/MRPS14/MRPS2/MRPS7/MRPS26/MRPS12/DAP3/MRPS9/MRPS5/MRPS28/MRPS22/MRPS11/MRPS16/MRPS18B/MRPS17	19
CC	GO:0046540	U4/U6 x U5 tri-snRNP complex	24/2178	41/19594	2.57353e-13	3.2679e-12	2.09562e-12	SNRPD3/SNU13/PRPF6/PRPF31/LSM5/EFTUD2/SNRPD2/SNRPB/LSM4/PRPF4/SNRPF/TXNL4B/TXNL4A/SNRPG/SNRNP200/ZMAT2/SNRPD1/USP39/PPIH/PRPF8/DDX23/SART1/SNRPE/LSM2	24
CC	GO:0005838	proteasome regulatory particle	16/2178	19/19594	3.60603e-13	4.49418e-12	2.88201e-12	PSMC4/PSMD8/PSMC6/PSMC1/PSMD7/PSMD3/PSMD11/PSMD14/ADRM1/PSMD4/PSMC2/PSMC3/PSMD1/PSMD2/PSMD13/PSMD12	16
CC	GO:0035770	ribonucleoprotein granule	71/2178	261/19594	3.93542e-13	4.81553e-12	3.08808e-12	UPF1/NSUN2/PSMA4/YBX1/ELAVL1/DDX1/OGFOD1/CNOT3/RPLP0/POLDIP3/PQBP1/GABPB1/ZFAND1/HNRNPL/CASC3/KPNB1/FXR1/EIF4G1/NCL/SUMO1/FASTKD2/TARDBP/PMS2/AGO2/STAU1/FASTKD3/SYMPK/SNRPB2/FXR2/LSM4/EIF2S1/CAPRIN1/TAF5L/DHX9/TBRG4/UBAP2/FASTKD1/RPTOR/UBAP2L/HAX1/SNRPG/POLR2D/CNOT9/G3BP1/CELF1/YTHDF1/EIF4E/HNRNPU/LARP1/RPUSD3/PSMC2/LARP4/HENMT1/HNRNPK/VCP/RPUSD4/PSMC3/TRUB2/POLR2G/HNRNPA3/EDC3/DDX28/HSF1/TUBB/HN…	71
CC	GO:0097526	spliceosomal tri-snRNP complex	24/2178	42/19594	5.37206e-13	6.45607e-12	4.14012e-12	SNRPD3/SNU13/PRPF6/PRPF31/LSM5/EFTUD2/SNRPD2/SNRPB/LSM4/PRPF4/SNRPF/TXNL4B/TXNL4A/SNRPG/SNRNP200/ZMAT2/SNRPD1/USP39/PPIH/PRPF8/DDX23/SART1/SNRPE/LSM2	24
CC	GO:0005852	eukaryotic translation initiation factor 3 complex	14/2178	15/19594	5.69811e-13	6.61177e-12	4.23997e-12	EIF3I/EIF3L/EIF3D/EIF3J/EIF3E/EIF3B/EIF3A/COPS5/EIF3G/EIF3H/EIF3M/EIF3F/EIF3K/EIF3C	14
CC	GO:0033290	eukaryotic 48S preinitiation complex	14/2178	15/19594	5.69811e-13	6.61177e-12	4.23997e-12	EIF3I/EIF3L/EIF3D/EIF3J/EIF3E/EIF3B/EIF3A/EIF3G/EIF2S1/EIF3H/EIF3M/EIF3F/EIF3K/EIF3C	14
CC	GO:0034399	nuclear periphery	44/2178	127/19594	1.75929e-12	1.99222e-11	1.27757e-11	ERCC8/SMC1A/NUFIP1/CAD/KIF4A/SRPK1/HNRNPM/PHF5A/SNW1/YY1/POLA1/SUV39H1/NUP93/PIAS4/SMC3/NUP98/NUP107/LMNB1/SFPQ/EBNA1BP2/CENPF/STAG1/HNRNPA2B1/NUP153/YEATS4/HAT1/PCNA/MORC2/MEN1/NONO/HNRNPU/AHCTF1/NUP205/PAXIP1/RAD21/RUVBL1/RUVBL2/XPOT/PRPF40A/BLM/CENPW/PHB2/EIF6/UHRF1	44
CC	GO:0043596	nuclear replication fork	19/2178	28/19594	1.77613e-12	1.99222e-11	1.27757e-11	BAZ1B/POLD1/MCM10/TIPIN/POLD3/POLA1/RPA3/POLD2/TIMELESS/MCM3/ZRANB3/RPA1/PCNA/SMARCAL1/PRIM2/MMS22L/TONSL/PRIM1/WDHD1	19
CC	GO:0071339	MLL1 complex	20/2178	31/19594	1.9202e-12	2.11851e-11	1.35855e-11	LAS1L/PHF20/CHD8/PRPF31/TAF6/RBBP5/TAF4/MEN1/TEX10/PELP1/SENP3/DPY30/E2F6/HCFC1/RUVBL1/TAF7/RUVBL2/MCRS1/WDR5/TAF9	20
CC	GO:0070993	translation preinitiation complex	15/2178	18/19594	2.75211e-12	2.98737e-11	1.91573e-11	EIF3I/EIF3L/EIF3D/EIF3J/EIF3E/EIF3B/EIF3A/EIF3G/EIF2S1/EIF3H/EIF3M/EIF1/EIF3F/EIF3K/EIF3C	15
CC	GO:0022624	proteasome accessory complex	17/2178	23/19594	2.97967e-12	3.18304e-11	2.04121e-11	PSMC4/PSMD8/PSMC6/PSMC1/PSMD7/PSMD3/PSMD11/PSMD14/ADRM1/PSME3/PSMD4/PSMC2/PSMC3/PSMD1/PSMD2/PSMD13/PSMD12	17
CC	GO:0031261	DNA replication preinitiation complex	12/2178	12/19594	3.46335e-12	3.64193e-11	2.33548e-11	MCM2/MCM6/CDC45/MCM5/GINS1/MCM4/MCM3/GINS2/ORC3/GINS4/MCM7/GINS3	12
CC	GO:0044665	MLL1/2 complex	20/2178	32/19594	4.58425e-12	4.73064e-11	3.03365e-11	LAS1L/PHF20/CHD8/PRPF31/TAF6/RBBP5/TAF4/MEN1/TEX10/PELP1/SENP3/DPY30/E2F6/HCFC1/RUVBL1/TAF7/RUVBL2/MCRS1/WDR5/TAF9	20
CC	GO:0016591	RNA polymerase II, holoenzyme	32/2178	76/19594	4.63926e-12	4.73064e-11	3.03365e-11	PAF1/MNAT1/TAF2/TAF11/POLR2E/POLR2F/RPRD1B/ERCC2/TAF6/GTF2H3/TBP/GTF2F1/TAF4/CDK7/TAF5L/GTF2A2/TAF4B/POLR2D/TAF5/GTF2E1/MMS19/TAF6L/ERCC3/POLR2H/LEO1/POLR2G/TAF7/GTF2H2C/TCEA1/GTF2E2/CTR9/TAF9	32
CC	GO:0015935	small ribosomal subunit	30/2178	69/19594	7.96751e-12	8.00319e-11	5.13226e-11	MRPS10/MRPS35/RPS5/MRPS33/MRPS18A/RPS16/RPS12/MRPS27/MRPS14/MRPS2/MRPS7/MRPS26/MRPS12/DAP3/MRPS9/RPS27A/MRPS5/EIF2A/MRPS28/RPS3/RPS21/RPS7/MRPS22/MRPS11/MRPS16/RPS4X/MRPS18B/RPS29/UBA52/MRPS17	30
CC	GO:0035097	histone methyltransferase complex	28/2178	62/19594	1.28641e-11	1.27316e-10	8.1645e-11	LAS1L/PHF20/PRMT5/CHD8/RBBP7/PRPF31/TAF6/EZH2/RBBP5/TAF4/MEN1/TEX10/PELP1/BOD1/PAXIP1/SENP3/DPY30/E2F6/HCFC1/RUVBL1/SUZ12/TAF7/RUVBL2/MCRS1/WDR5/HDAC2/NCOA6/TAF9	28
CC	GO:0016282	eukaryotic 43S preinitiation complex	14/2178	17/19594	2.07805e-11	2.02685e-10	1.29977e-10	EIF3I/EIF3L/EIF3D/EIF3J/EIF3E/EIF3B/EIF3A/EIF3G/EIF3H/EIF3M/EIF1/EIF3F/EIF3K/EIF3C	14
CC	GO:0101031	chaperone complex	20/2178	34/19594	2.26535e-11	2.17797e-10	1.39668e-10	PPP5C/DNAJB11/HSP90AB1/HSPA8/PTGES3/CCT4/TCP1/CCT7/CCT6A/CCT5/CCT8/CCT3/DNAAF2/CCT2/STIP1/RUVBL1/RUVBL2/PSMG1/HSF1/DNAJC9	20
CC	GO:0071162	CMG complex	11/2178	11/19594	3.1298e-11	2.9667e-10	1.90248e-10	MCM2/MCM6/CDC45/MCM5/GINS1/MCM4/MCM3/GINS2/GINS4/MCM7/GINS3	11
CC	GO:0031305	integral component of mitochondrial inner membrane	26/2178	56/19594	3.18735e-11	2.97929e-10	1.91054e-10	AGK/DNAJC11/MCUR1/SLC25A3/L2HGDH/SAMM50/CHCHD3/COA1/HSPA9/SLC25A19/IMMT/TIMM17A/AFG3L2/TMEM177/OXA1L/CHCHD6/CCDC51/SFXN1/GHITM/COX11/COQ2/MTX1/SFXN4/APOO/UQCC3/TIMM23	26
CC	GO:0030688	preribosome, small subunit precursor	13/2178	15/19594	3.23907e-11	2.98615e-10	1.91495e-10	RIOK2/NOP14/FTSJ3/BYSL/UTP20/RIOK1/LTV1/NOB1/RRP1B/RRP1/TSR1/NOC4L/NOP9	13
CC	GO:0031304	intrinsic component of mitochondrial inner membrane	26/2178	57/19594	5.24247e-11	4.76781e-10	3.05748e-10	AGK/DNAJC11/MCUR1/SLC25A3/L2HGDH/SAMM50/CHCHD3/COA1/HSPA9/SLC25A19/IMMT/TIMM17A/AFG3L2/TMEM177/OXA1L/CHCHD6/CCDC51/SFXN1/GHITM/COX11/COQ2/MTX1/SFXN4/APOO/UQCC3/TIMM23	26
CC	GO:0030496	midbody	56/2178	203/19594	6.52609e-11	5.85535e-10	3.7549e-10	POLDIP2/RALA/CCDC124/ANLN/DDX11/HSPA5/GNAI3/ASPM/SPAG5/KEAP1/AGBL5/AURKA/BIRC5/NUDC/KIF4A/TTLL12/ERH/KIF3B/CHMP4B/RNF8/KIF20A/ECT2/TXNDC9/NEK2/CENPF/KIF14/CIT/RAN/PSRC1/CDCA8/NAT10/URB2/DCTN3/KIF23/CEP55/KIF20B/CENPE/KATNB1/INCENP/HNRNPU/SAFB/ALKBH4/RACGAP1/ENTR1/HSP90B1/PLK1/RAB8A/MPLKIP/CDK1/SHCBP1/AURKB/RCC2/PPP1CC/KATNA1/CHAMP1/NUP62	56
CC	GO:0098800	inner mitochondrial membrane protein complex	47/2178	155/19594	6.61228e-11	5.85535e-10	3.7549e-10	NDUFAB1/AGK/DNAJC11/NDUFS1/TIMM21/SAMM50/TIMM9/TIMM50/CHCHD3/GRPEL1/FOXRED1/ATP5F1B/HSPA9/COX7A2L/ATP5PB/SDHB/IMMT/TIMM17A/TIMM10/NDUFB5/AFG3L2/TIMM29/SDHC/NDUFB11/NDUFB9/ATP5F1A/ATP5MC3/NDUFS2/ATP5MC1/CHCHD6/GRPEL2/NDUFB6/ATP5F1C/NDUFV1/UQCRFS1/MTX1/UQCRH/TIMM22/COX5A/CYC1/NDUFA12/APOO/NDUFA6/NDUFA4/NDUFS3/PHB2/TIMM23	47
CC	GO:0090734	site of DNA damage	35/2178	97/19594	8.81675e-11	7.70607e-10	4.94172e-10	ELOA/MRE11/RAD51/RAD18/XRCC5/RIF1/EXD2/WDR76/RPA3/CBX1/PRPF19/TIMELESS/RNF8/MAD2L2/CBX3/HROB/AUNIP/PARP2/RPA1/SLF1/RNF138/SMARCAL1/NABP2/WRAP53/PARP1/XRCC4/UBQLN4/SMC6/VCP/DDB1/RFWD3/ESCO2/TRAIP/KDM4D/H2AX	35
CC	GO:0001650	fibrillar center	43/2178	140/19594	2.69473e-10	2.32507e-09	1.49101e-09	DDX11/NOP58/TCOF1/NUFIP1/ORC6/TIMM13/SMARCB1/EIF3L/POLR2F/RAE1/NOP56/EEF1D/TIMM44/FBL/UBTF/GAR1/POLR1G/HEATR1/SNRPB2/DKC1/THAP1/CDK7/IMP4/POLR1E/UTP4/TAF4B/URB1/DDX46/NONO/TERF1/MTDH/DSN1/SPATA2/WDR43/UTP15/NOLC1/LEO1/APEX2/UBE2N/CCDC137/TOP1/DCLRE1A/ACACA	43
CC	GO:0042575	DNA polymerase complex	14/2178	19/19594	2.85926e-10	2.4358e-09	1.56202e-09	POLD1/POLD3/POLE2/POLA1/CHRAC1/POLD2/MCM3/MAD2L2/POLG/PRIM2/POLE3/POLE/PRIM1/CRCP	14
CC	GO:0034709	methylosome	11/2178	12/19594	3.3748e-10	2.83905e-09	1.82061e-09	CLNS1A/SNRPD3/PRMT5/ERH/SNRPD2/SNRPB/PRMT1/SNRPF/SNRPG/SNRPD1/SNRPE	11
CC	GO:0005697	telomerase holoenzyme complex	15/2178	22/19594	3.7175e-10	3.08874e-09	1.98073e-09	HNRNPC/SNRPD3/GAR1/PTGES3/SMG7/SNRPB/GNL3L/DKC1/NAT10/WRAP53/NVL/NHP2/HNRNPU/SNRPE/SMG5	15
CC	GO:0005686	U2 snRNP	16/2178	25/19594	3.9411e-10	3.23459e-09	2.07426e-09	SF3B2/SF3A1/SNRPD3/PHF5A/HTATSF1/SF3B6/SNRPD2/SNRPB/SNRPB2/SNRPA1/SNRPG/SNRPD1/SF3B5/SNRPE/SF3A3/SF3B3	16
CC	GO:0098573	intrinsic component of mitochondrial membrane	32/2178	90/19594	8.62053e-10	6.9899e-09	4.48246e-09	AGK/DNAJC11/MCUR1/SLC25A3/L2HGDH/SAMM50/CHCHD3/COA1/HSPA9/MFN2/SLC25A19/TOMM40/IMMT/TIMM17A/ABCB10/AFG3L2/TMEM177/TOMM70/OXA1L/CHCHD6/CCDC51/SFXN1/GHITM/COX11/COQ2/MTX1/TOMM20/TMEM70/SFXN4/APOO/UQCC3/TIMM23	32
CC	GO:0140534	endoplasmic reticulum protein-containing complex	39/2178	125/19594	1.08519e-09	8.69448e-09	5.57556e-09	HSPA5/UFD1/ZW10/PIGS/GANAB/DNAJB11/PIGH/EMC9/HM13/PIGU/AUP1/RPN2/PIGT/EMC1/EMC4/PRKCSH/EMC8/SEC61G/STT3A/RINT1/DERL1/PDIA6/SRPRB/HYOU1/ABCB9/NBAS/RPN1/RP9/CAMLG/VCP/SEC11C/HSP90B1/MMGT1/CALR/NPLOC4/FAF1/GPAA1/GET3/DDOST	39
CC	GO:0005669	transcription factor TFIID complex	18/2178	33/19594	1.2525e-09	9.91685e-09	6.35944e-09	TAF2/TAF11/ERCC2/TAF6/GTF2H3/TBP/GTF2F1/TAF4/GTF2A2/TAF4B/TAF5/GTF2E1/TAF6L/ERCC3/TAF7/TCEA1/GTF2E2/TAF9	18
CC	GO:0000792	heterochromatin	27/2178	69/19594	1.54102e-09	1.20594e-08	7.73339e-09	WDR76/SUV39H1/EZH2/CBX1/MACROH2A1/CENPA/HDAC1/HELLS/TCP1/CBX3/TRIM28/DNMT1/UBA1/MORC2/HMGA1/INCENP/NCAPD3/EME1/RRP1B/LRWD1/H2AZ1/ESCO2/BEND3/SUZ12/HSF1/KDM4D/UHRF1	27
CC	GO:0005876	spindle microtubule	30/2178	83/19594	1.83237e-09	1.41745e-08	9.08979e-09	PAFAH1B1/KIF2A/ZW10/AURKA/BIRC5/KIF4A/KIF3B/MAPRE1/CHMP4B/TTL/KIF18A/HAUS8/TUBG1/PSRC1/HAUS2/KIF11/CENPE/CALM2/BOD1/HAUS6/HAUS1/HNRNPU/CCSAP/SKA1/SKA3/PLK1/CDK1/AURKB/KIF18B/HAUS5	30
CC	GO:0034719	SMN-Sm protein complex	13/2178	18/19594	1.91079e-09	1.46132e-08	9.37111e-09	STRAP/DDX20/GEMIN5/GEMIN2/SNRPD3/SNRPD2/SNRPB/SNRPF/SNRPG/GEMIN6/SNRPD1/GEMIN4/SNRPE	13
CC	GO:0032592	integral component of mitochondrial membrane	31/2178	88/19594	2.04656e-09	1.54757e-08	9.9242e-09	AGK/DNAJC11/MCUR1/SLC25A3/L2HGDH/SAMM50/CHCHD3/COA1/HSPA9/SLC25A19/TOMM40/IMMT/TIMM17A/ABCB10/AFG3L2/TMEM177/TOMM70/OXA1L/CHCHD6/CCDC51/SFXN1/GHITM/COX11/COQ2/MTX1/TOMM20/TMEM70/SFXN4/APOO/UQCC3/TIMM23	31
CC	GO:0016363	nuclear matrix	35/2178	109/19594	3.27965e-09	2.45245e-08	1.5727e-08	ERCC8/SMC1A/NUFIP1/CAD/KIF4A/SRPK1/HNRNPM/PHF5A/SNW1/YY1/POLA1/PIAS4/SMC3/LMNB1/SFPQ/CENPF/STAG1/HNRNPA2B1/YEATS4/HAT1/MORC2/MEN1/NONO/HNRNPU/AHCTF1/PAXIP1/RAD21/RUVBL1/RUVBL2/XPOT/PRPF40A/BLM/CENPW/PHB2/UHRF1	35
CC	GO:0005874	microtubule	90/2178	435/19594	3.4732e-09	2.56864e-08	1.64721e-08	FKBP4/PAFAH1B1/ZNF207/KIF1B/ASPM/KIF2A/CFAP20/NDE1/GTSE1/SPAG5/KIF22/ZW10/AURKA/TPX2/DYNLL1/BIRC5/NUDC/KIF4A/KIF3B/MAPRE1/CHMP4B/EMD/RPGRIP1L/FSD1/EIF3A/TUBD1/KIF20A/TTL/CCT4/NEK2/KIF14/TCP1/KIF18A/TUBA1B/KNSTRN/HAUS8/TUBG1/PSRC1/CCT7/TTLL4/CKAP2/ODF2/KIF23/HAUS2/TUBGCP4/LRPPRC/KIF11/KIF20B/CENPE/KATNB1/KIF2C/CALM2/DYNC1LI1/SRPRB/BOD1/CCT6A/HAUS6/INCENP/CCT5/CENPJ/HAUS1/HNRNPU/CCSAP/SKA1/CCT8/PCN…	90
CC	GO:0005849	mRNA cleavage factor complex	13/2178	19/19594	5.43134e-09	3.97314e-08	2.54788e-08	CPSF1/CSTF1/CSTF2/CPSF6/CPSF3/SYMPK/FIP1L1/CPSF7/SSU72/CPSF4/CPSF2/NUDT21/CLP1	13
CC	GO:0097431	mitotic spindle pole	18/2178	36/19594	7.88271e-09	5.70437e-08	3.65808e-08	ASPM/SMC1A/SPAG5/AURKA/RAE1/FAM83D/BCCIP/SMC3/GIT1/IK/STAG1/GPSM2/KIF20B/SMC6/PLK1/AURKB/HSF1/KATNA1	18
CC	GO:0015030	Cajal body	28/2178	79/19594	1.04457e-08	7.47866e-08	4.79589e-08	LSG1/NOP58/SART3/XPO1/OIP5/FBL/PRPF31/EFTUD2/GAR1/FRG1/ZPR1/SMNDC1/HNRNPA2B1/SNRPC/DKC1/TOE1/PRPF4/TGS1/WRAP53/ZNF473/ZC3H8/DDX46/NHP2/PHAX/NOLC1/SART1/GEMIN4/EWSR1	28
CC	GO:0005682	U5 snRNP	14/2178	23/19594	1.30189e-08	9.2229e-08	5.91443e-08	SNRNP40/SNRPD3/PRPF6/SNRPD2/SNRPB/AAR2/TXNL4B/TXNL4A/SNRPG/SNRNP200/SNRPD1/PRPF8/DDX23/SNRPE	14
CC	GO:0005732	sno(s)RNA-containing ribonucleoprotein complex	16/2178	30/19594	1.62457e-08	1.13889e-07	7.30344e-08	NOP58/SNRNP40/SNU13/NOP56/POP1/POP4/FBL/GAR1/RRP9/RPP40/DKC1/NAF1/NHP2/RPP30/NOLC1/POP7	16
CC	GO:0005847	mRNA cleavage and polyadenylation specificity factor complex	11/2178	15/19594	2.78655e-08	1.91362e-07	1.22716e-07	CPSF1/CSTF2/CPSF6/CPSF3/SYMPK/FIP1L1/CPSF7/SSU72/CPSF4/CPSF2/NUDT21	11
CC	GO:0030894	replisome	11/2178	15/19594	2.78655e-08	1.91362e-07	1.22716e-07	POLD1/POLD3/POLA1/RPA3/POLD2/MCM3/RPA1/PCNA/PRIM2/DONSON/PRIM1	11
CC	GO:0036464	cytoplasmic ribonucleoprotein granule	57/2178	243/19594	3.05586e-08	2.07737e-07	1.33217e-07	UPF1/NSUN2/PSMA4/YBX1/ELAVL1/DDX1/OGFOD1/CNOT3/RPLP0/POLDIP3/PQBP1/GABPB1/ZFAND1/CASC3/KPNB1/FXR1/EIF4G1/NCL/TARDBP/PMS2/AGO2/STAU1/SNRPB2/FXR2/LSM4/EIF2S1/CAPRIN1/TAF5L/DHX9/UBAP2/RPTOR/UBAP2L/HAX1/SNRPG/POLR2D/CNOT9/G3BP1/CELF1/YTHDF1/EIF4E/HNRNPU/LARP1/PSMC2/LARP4/HENMT1/HNRNPK/VCP/PSMC3/POLR2G/EDC3/TUBB/HNRNPAB/RPS4X/CNOT7/TOP1/LSM2/LSM14A	57
CC	GO:0005666	RNA polymerase III complex	12/2178	18/19594	3.3729e-08	2.26996e-07	1.45567e-07	POLR3B/POLR2E/POLR2F/POLR3H/POLR3G/POLR3F/POLR3A/POLR3K/POLR2H/POLR3D/POLR3C/CRCP	12
CC	GO:1904949	ATPase complex	29/2178	88/19594	3.73754e-08	2.49046e-07	1.59707e-07	BAZ1B/DPF1/SMARCD1/ACTR6/SMARCB1/HMGXB4/YY1/CSNK2A1/ACTR5/RBBP7/CHRAC1/SMARCD2/HDAC1/UCHL5/DEK/SMARCA4/MYBBP1A/DPF2/ACTL6A/ANP32E/POLE3/MTA2/VCP/DDX21/GATAD2A/RUVBL1/RUVBL2/MCRS1/HDAC2	29
CC	GO:0005814	centriole	40/2178	147/19594	5.06878e-08	3.3444e-07	2.14469e-07	MPHOSPH9/KIF2A/CFAP20/WDR62/AURKA/CEP128/IFT52/CEP76/BCCIP/TUBD1/WRAP73/GLE1/CEP89/STIL/CEP250/TUBG1/TOP2A/RAN/CEP20/ODF2/CEP55/NEDD1/PLK4/CEP78/CENPJ/POC5/CETN3/CCSAP/SASS6/PCNT/TEDC2/CCNF/POC1A/PLK1/RAB8A/CNTROB/RTTN/KIF24/HYLS1/DCTN1	40
CC	GO:0005689	U12-type spliceosomal complex	15/2178	29/19594	7.8918e-08	5.15649e-07	3.30673e-07	YBX1/SF3B2/SNRPD3/PHF5A/DHX15/SF3B6/SNRPD2/SNRPB/SNRPF/SNRPG/SNRNP25/SNRPD1/SF3B5/SNRPE/SF3B3	15
CC	GO:0070603	SWI/SNF superfamily-type complex	28/2178	86/19594	8.56215e-08	5.5407e-07	3.55312e-07	BAZ1B/DPF1/SMARCD1/ACTR6/SMARCB1/HMGXB4/YY1/CSNK2A1/ACTR5/RBBP7/CHRAC1/SMARCD2/HDAC1/UCHL5/DEK/SMARCA4/MYBBP1A/DPF2/ACTL6A/ANP32E/POLE3/MTA2/DDX21/GATAD2A/RUVBL1/RUVBL2/MCRS1/HDAC2	28
CC	GO:1904813	ficolin-1-rich granule lumen	35/2178	124/19594	1.27896e-07	8.19755e-07	5.2569e-07	PSMB1/HSP90AA1/HUWE1/HSP90AB1/PSMD7/GPI/PDAP1/PSMD3/KPNB1/PSMD11/HSPA8/LTA4H/CAND1/PSMD14/PRDX4/ACLY/PSMB7/PSMA5/ILF2/CCT8/PSMC2/VCP/PSMC3/EEF2/CANT1/PGAM1/PSMD2/KCMF1/IMPDH2/PSMD13/HMGB1/PPIA/XRCC6/PSMD12/PNP	35
CC	GO:1902554	serine/threonine protein kinase complex	30/2178	99/19594	1.81696e-07	1.1536e-06	7.39774e-07	MNAT1/XRCC5/ERCC2/CCNE1/BCCIP/GTF2H3/ATG101/CKS2/PCNA/CCNB1/CDK7/CDK4/CALM2/CCNA2/PARD3/MMS19/CCNB2/CCNF/ERCC3/CDK12/CDK1/CKS1B/CCNE2/CDK5R1/SMCR8/GTF2H2C/XRCC6/CHUK/PRKDC/CCNQ	30
CC	GO:0005844	polysome	23/2178	65/19594	2.19605e-07	1.38126e-06	8.85766e-07	GCN1/FXR1/EIF4G1/AGO2/FXR2/EIF2S1/DHX9/PNPT1/BTF3/EIF3H/RPS3/LARP1/VBP1/RPL8/EEF2/RPS21/CALR/DRG1/MCRS1/RPS4X/RPL10A/RPS29/RPL41	23
CC	GO:0005667	transcription regulator complex	91/2178	483/19594	2.84175e-07	1.77083e-06	1.13559e-06	KDM1A/E2F2/MED24/MNAT1/DEPDC1/TAF2/DDX20/TAF11/TCF3/RBL1/GEMIN5/RCOR1/TFAP4/YY1/APEX1/ADNP/CSNK2A1/E2F1/RBBP7/BRF2/ERCC2/MED26/TAF6/GTF2H3/GMNN/TBP/SUB1/GTF3C2/TAF1B/CEBPZ/HDAC1/SFPQ/POLR1G/GTF3C3/CBX3/ATF1/GTF3C4/GTF2F1/MED1/TAF4/TRIM28/MEN1/MED6/CDK7/CDK4/TAF5L/MYC/HMGA1/ASCC1/GTF2A2/TAF4B/HDGF/TAF1A/HAX1/PARP1/NONO/MED22/GTF3C5/TAF5/MTA2/GTF2E1/MMS19/MED19/TAF6L/ERCC3/NAA15/MED30/E2F7/TAF1D/GA…	91
CC	GO:1990391	DNA repair complex	18/2178	44/19594	3.72061e-07	2.29722e-06	1.47315e-06	KDM1A/BRCA1/ERCC8/POLD1/XRCC1/XRCC5/PALB2/RCOR1/MSH2/MSH6/PMS2/BRCA2/FANCI/FANCD2/XRCC4/ERCC3/XRCC6/PRKDC	18
CC	GO:0005680	anaphase-promoting complex	12/2178	21/19594	3.87203e-07	2.34764e-06	1.50548e-06	CDC27/ANAPC5/CDC23/FZR1/UBE2S/ANAPC15/CDC20/ANAPC1/BUB1B/UBE2C/CDC26/ANAPC7	12
CC	GO:0005742	mitochondrial outer membrane translocase complex	12/2178	21/19594	3.87203e-07	2.34764e-06	1.50548e-06	DNAJC11/TOMM22/SAMM50/CHCHD3/HSPA9/TOMM40/IMMT/TOMM70/CHCHD6/MTX1/TOMM20/APOO	12
CC	GO:0000940	outer kinetochore	9/2178	12/19594	4.10017e-07	2.46376e-06	1.57995e-06	SPDL1/NDC80/CENPF/CCNB1/BOD1/SKA1/BUB1B/SKA3/PLK1	9
CC	GO:0051233	spindle midzone	16/2178	36/19594	4.24525e-07	2.52837e-06	1.62138e-06	RIF1/AURKA/CDC6/MAPRE1/KIF14/KIF18A/CDCA8/KIF20B/CENPE/INCENP/HNRNPU/RACGAP1/PLK1/AURKB/RCC2/KIF18B	16
CC	GO:0000152	nuclear ubiquitin ligase complex	18/2178	45/19594	5.55829e-07	3.28134e-06	2.10425e-06	CDC27/BRCA1/RAD51/ANAPC5/CDC23/FZR1/UBE2S/ANAPC15/PCGF1/CDC20/BRCA2/ANAPC1/PCGF6/BUB1B/UBE2C/CDC26/BRCC3/ANAPC7	18
CC	GO:1902911	protein kinase complex	32/2178	115/19594	6.19544e-07	3.62568e-06	2.32506e-06	LAS1L/MNAT1/XRCC5/ERCC2/CCNE1/BCCIP/GTF2H3/ATG101/CKS2/PCNA/CCNB1/CDK7/CDK4/CALM2/CCNA2/PARD3/MMS19/CCNB2/CCNF/ERCC3/CDK12/CDK1/CKS1B/CCNE2/CDK5R1/SMCR8/PRKAG1/GTF2H2C/XRCC6/CHUK/PRKDC/CCNQ	32
CC	GO:0098799	outer mitochondrial membrane protein complex	12/2178	22/19594	7.65394e-07	4.44061e-06	2.84765e-06	DNAJC11/TOMM22/SAMM50/CHCHD3/HSPA9/TOMM40/IMMT/TOMM70/CHCHD6/MTX1/TOMM20/APOO	12
CC	GO:1902555	endoribonuclease complex	15/2178	34/19594	1.09775e-06	6.3144e-06	4.04927e-06	LAS1L/HSD17B10/POP1/POP4/AGO2/RPP40/DHX9/TARBP2/RPP30/TSEN34/POP7/CLP1/TRMT10C/TSEN54/TSN	15
CC	GO:0043601	nuclear replisome	9/2178	13/19594	1.20017e-06	6.84504e-06	4.38956e-06	POLD1/POLD3/POLA1/RPA3/POLD2/MCM3/RPA1/PRIM2/PRIM1	9
CC	GO:0031301	integral component of organelle membrane	74/2178	382/19594	1.23773e-06	6.99991e-06	4.48888e-06	AGK/DNAJC11/ELOVL5/HSPA5/MCUR1/SLC25A3/SLC27A5/PIGS/L2HGDH/SAMM50/SLC25A17/EMC9/HM13/PIGU/BFAR/CHCHD3/COA1/TBL2/CCDC47/HSPA9/BNIP1/AUP1/UBIAD1/SLC35B1/PIGT/SLC25A19/ERGIC3/CANX/EMC1/EMC4/TOMM40/EMC8/IMMT/TIMM17A/ABCB10/DERL1/PREB/AFG3L2/TEX261/TMEM177/EBP/ABCB9/TOMM70/OXA1L/SLC35B2/ATP13A2/CHCHD6/CCDC51/SFXN1/CAMLG/QSOX2/GHITM/COX11/YIF1B/MMGT1/DPAGT1/DHCR7/COQ2/MTX1/RCE1/TOMM20/TMEM70/SLC35A4/CA…	74
CC	GO:0031248	protein acetyltransferase complex	28/2178	97/19594	1.37495e-06	7.64747e-06	4.90414e-06	PHF20/TAF2/ATXN7L3/MRGBP/TAF6/ENY2/NAA50/YEATS4/TAF4/NAA35/TAF5L/ACTL6A/KANSL2/NAA30/POLE3/TAF5/KAT14/TAF6L/YEATS2/NAA15/HCFC1/NAA20/RUVBL1/TAF7/RUVBL2/MCRS1/WDR5/TAF9	28
CC	GO:1902493	acetyltransferase complex	28/2178	97/19594	1.37495e-06	7.64747e-06	4.90414e-06	PHF20/TAF2/ATXN7L3/MRGBP/TAF6/ENY2/NAA50/YEATS4/TAF4/NAA35/TAF5L/ACTL6A/KANSL2/NAA30/POLE3/TAF5/KAT14/TAF6L/YEATS2/NAA15/HCFC1/NAA20/RUVBL1/TAF7/RUVBL2/MCRS1/WDR5/TAF9	28
CC	GO:0005721	pericentric heterochromatin	12/2178	23/19594	1.43807e-06	7.93295e-06	5.08722e-06	EZH2/CBX1/MACROH2A1/CENPA/HELLS/CBX3/DNMT1/INCENP/NCAPD3/LRWD1/ESCO2/KDM4D	12
CC	GO:0031300	intrinsic component of organelle membrane	78/2178	412/19594	1.63212e-06	8.93023e-06	5.72674e-06	AGK/DNAJC11/ELOVL5/HSPA5/MCUR1/SLC25A3/SLC27A5/PIGS/L2HGDH/SAMM50/SLC25A17/EMC9/DNAJC5/HM13/PIGU/BFAR/CHCHD3/COA1/TBL2/CCDC47/RAB35/HSPA9/BNIP1/AUP1/MFN2/UBIAD1/SLC35B1/PIGT/SLC25A19/ERGIC3/CANX/EMC1/EMC4/TOMM40/EMC8/IMMT/TIMM17A/ABCB10/DERL1/PREB/AFG3L2/TEX261/TMEM177/EBP/GOLGA7/ABCB9/TOMM70/OXA1L/SLC35B2/ATP13A2/CHCHD6/CCDC51/SFXN1/CAMLG/QSOX2/GHITM/COX11/YIF1B/MMGT1/DPAGT1/DHCR7/COQ2/MTX1/RCE1…	78
CC	GO:0005839	proteasome core complex	11/2178	20/19594	2.01384e-06	1.093e-05	7.00912e-06	PSMB1/PSMA4/PSMA3/PSMB5/PSMA7/PSMF1/PSMB2/PSMB7/PSMB6/PSMA5/PSMB4	11
CC	GO:0035861	site of double-strand break	23/2178	73/19594	2.27308e-06	1.22383e-05	7.84812e-06	MRE11/RAD51/RAD18/RIF1/RPA3/PRPF19/TIMELESS/RNF8/MAD2L2/SLF1/RNF138/SMARCAL1/NABP2/WRAP53/PARP1/XRCC4/SMC6/VCP/DDB1/RFWD3/ESCO2/KDM4D/H2AX	23
CC	GO:0005832	chaperonin-containing T-complex	8/2178	11/19594	2.78679e-06	1.47678e-05	9.47023e-06	CCT4/TCP1/CCT7/CCT6A/CCT5/CCT8/CCT3/CCT2	8
CC	GO:0017101	aminoacyl-tRNA synthetase multienzyme complex	8/2178	11/19594	2.78679e-06	1.47678e-05	9.47023e-06	KARS1/AIMP2/RARS1/LARS1/EPRS1/AIMP1/MARS1/IARS1	8
CC	GO:0010494	cytoplasmic stress granule	24/2178	79/19594	2.84707e-06	1.49693e-05	9.59948e-06	YBX1/ELAVL1/DDX1/OGFOD1/PQBP1/ZFAND1/CASC3/KPNB1/EIF4G1/TARDBP/STAU1/EIF2S1/CAPRIN1/RPTOR/UBAP2L/G3BP1/CELF1/YTHDF1/EIF4E/LARP1/LARP4/HNRNPK/VCP/LSM14A	24
CC	GO:0000794	condensed nuclear chromosome	23/2178	74/19594	2.95384e-06	1.54103e-05	9.88229e-06	BRCA1/RAD51/SMC1A/CCNB1IP1/SUV39H1/SMC3/RAD1/NEK2/TUBG1/PSMC3IP/LRPPRC/BRCA2/INCENP/CHEK1/NIFK/TOPBP1/RAD21/NOL6/PLK1/RRS1/RCC1/H2AX/BLM	23
CC	GO:0032993	protein-DNA complex	48/2178	220/19594	3.3152e-06	1.71625e-05	1.10059e-05	POLD1/WDR18/MCM2/MCM6/POLD3/XRCC5/CDC45/MCM5/GINS1/MRGBP/POLA1/BRF2/MCM4/H2AZ2/RPA3/POLD2/GTF2H3/MCM3/TBP/MACROH2A1/CENPA/YEATS4/GINS2/RPA1/PCNA/SLF1/ORC3/ACTL6A/PARP1/PRIM2/GINS4/TERF1/GTF2E1/DONSON/ERCC3/POLR2H/H2AZ1/MCM7/RUVBL1/SUZ12/NPM1/GINS3/RUVBL2/H2AX/XRCC6/PRIM1/TOP1/PRKDC	48
CC	GO:0090575	RNA polymerase II transcription regulator complex	49/2178	230/19594	5.32295e-06	2.73462e-05	1.75365e-05	E2F2/MED24/MNAT1/TAF2/TAF11/TCF3/GEMIN5/ADNP/E2F1/ERCC2/MED26/TAF6/GTF2H3/TBP/CEBPZ/SFPQ/CBX3/ATF1/GTF2F1/MED1/TAF4/TRIM28/MED6/CDK7/TAF5L/MYC/HMGA1/GTF2A2/TAF4B/NONO/MED22/TAF5/GTF2E1/MMS19/MED19/TAF6L/ERCC3/MED30/E2F7/ING2/E2F6/TAF7/MED14/GTF2H2C/TCEA1/GTF2E2/HNRNPAB/TFDP1/TAF9	49
CC	GO:0000791	euchromatin	20/2178	62/19594	6.86968e-06	3.5025e-05	2.24607e-05	PAF1/TCF3/EXOSC5/ALKBH1/EXOSC3/SUPT6H/TBP/CBX3/TRIM28/PELP1/ZC3H8/RBMX/RRP1B/H2AZ1/EXOSC10/EXOSC4/RUVBL2/HSF1/CTR9/UHRF1	20
CC	GO:0071006	U2-type catalytic step 1 spliceosome	8/2178	12/19594	7.54033e-06	3.78705e-05	2.42854e-05	RBM22/CASC3/PRPF19/MAGOHB/EIF4A3/SNRNP200/PRPF8/RBM8A	8
CC	GO:0071012	catalytic step 1 spliceosome	8/2178	12/19594	7.54033e-06	3.78705e-05	2.42854e-05	RBM22/CASC3/PRPF19/MAGOHB/EIF4A3/SNRNP200/PRPF8/RBM8A	8
CC	GO:0005875	microtubule associated complex	37/2178	160/19594	1.07991e-05	5.38354e-05	3.45234e-05	PAFAH1B1/NUDCD3/KIF1B/KIF2A/NDE1/KIF22/AURKA/DYNLL1/BIRC5/KIF3B/KIF20A/KIF14/KIF18A/STAU1/HAUS8/CDCA8/DCTN3/KIF23/HAUS2/KIF11/KIF20B/KATNB1/KIF2C/DYNC1LI1/HAUS6/INCENP/HAUS1/LRP8/KIF15/KLC2/DCTN2/AURKB/KIF18B/DYNC1H1/DCTN1/KIFC1/HAUS5	37
CC	GO:0000307	cyclin-dependent protein kinase holoenzyme complex	17/2178	49/19594	1.11809e-05	5.49252e-05	3.52222e-05	MNAT1/CCNE1/BCCIP/CKS2/PCNA/CCNB1/CDK7/CDK4/CCNA2/CCNB2/CCNF/CDK12/CDK1/CKS1B/CCNE2/CDK5R1/CCNQ	17
CC	GO:0005871	kinesin complex	17/2178	49/19594	1.11809e-05	5.49252e-05	3.52222e-05	PAFAH1B1/KIF1B/KIF2A/NDE1/KIF22/KIF3B/KIF20A/KIF14/KIF18A/KIF23/KIF11/KIF20B/KIF2C/KIF15/KLC2/KIF18B/KIFC1	17
CC	GO:0022626	cytosolic ribosome	27/2178	102/19594	1.25593e-05	6.12496e-05	3.92779e-05	RPL26L1/RPS5/RPLP0/RPS16/RPS12/ZCCHC17/RPL5/FXR2/RPL27/RPS27A/EIF2A/RPL7L1/RPL7/RPS3/RPL8/MRPL1/RPS21/RPS7/MRPS11/RPL35A/RPS4X/RPL23A/RPL10A/RPS29/UBA52/RPL41/RPL17	27
CC	GO:0070461	SAGA-type complex	14/2178	36/19594	1.48595e-05	7.19457e-05	4.61371e-05	TAF2/ATXN7L3/TAF6/ENY2/TAF4/TAF5L/POLE3/TAF5/KAT14/TAF6L/YEATS2/TAF7/WDR5/TAF9	14
CC	GO:0031968	organelle outer membrane	48/2178	232/19594	1.50486e-05	7.23407e-05	4.63904e-05	AGK/DNAJC11/COASY/ENO1/VDAC3/EXD2/STARD7/ITPR3/TOMM22/MIEF1/SAMM50/EMD/ARMC1/CHCHD3/MTCH2/HSPA9/MFN2/MSTO1/TOMM40/RTN4IP1/IMMT/SMPD4/LRPPRC/HAX1/RPS27A/CISD2/NIPSNAP2/SIGMAR1/QTRT2/TOMM70/ATP5MC3/AGPAT5/MTERF3/CHCHD6/VDAC2/DHCR7/MTX1/TOMM20/APOO/BRI3BP/PPP1CC/MTOR/OPA1/VDAC1/PHB2/UBA52/PGAM5/MYO19	48
CC	GO:0001401	SAM complex	8/2178	13/19594	1.76846e-05	8.26509e-05	5.3002e-05	DNAJC11/SAMM50/CHCHD3/HSPA9/IMMT/CHCHD6/MTX1/APOO	8
CC	GO:0005687	U4 snRNP	8/2178	13/19594	1.76846e-05	8.26509e-05	5.3002e-05	SNRPD3/PRPF31/SNRPD2/SNRPB/SNRPF/SNRPG/SNRPD1/SNRPE	8
CC	GO:0005736	RNA polymerase I complex	8/2178	13/19594	1.76846e-05	8.26509e-05	5.3002e-05	POLR1A/POLR2E/POLR2F/POLR1F/POLR1G/POLR1B/POLR1E/POLR2H	8
CC	GO:0140275	MIB complex	8/2178	13/19594	1.76846e-05	8.26509e-05	5.3002e-05	DNAJC11/SAMM50/CHCHD3/HSPA9/IMMT/CHCHD6/MTX1/APOO	8
CC	GO:0035145	exon-exon junction complex	7/2178	10/19594	1.83789e-05	8.53033e-05	5.4703e-05	UPF1/CASC3/MAGOHB/UPF3B/EIF4A3/MAGOH/RBM8A	7
CC	GO:0019867	outer membrane	48/2178	234/19594	1.90557e-05	8.78391e-05	5.63291e-05	AGK/DNAJC11/COASY/ENO1/VDAC3/EXD2/STARD7/ITPR3/TOMM22/MIEF1/SAMM50/EMD/ARMC1/CHCHD3/MTCH2/HSPA9/MFN2/MSTO1/TOMM40/RTN4IP1/IMMT/SMPD4/LRPPRC/HAX1/RPS27A/CISD2/NIPSNAP2/SIGMAR1/QTRT2/TOMM70/ATP5MC3/AGPAT5/MTERF3/CHCHD6/VDAC2/DHCR7/MTX1/TOMM20/APOO/BRI3BP/PPP1CC/MTOR/OPA1/VDAC1/PHB2/UBA52/PGAM5/MYO19	48
CC	GO:0070822	Sin3-type complex	8/2178	14/19594	3.7228e-05	0.000170439	0.000109298	BRMS1L/CSNK2A1/HDAC1/SAP130/SINHCAF/ING2/BRMS1/HDAC2	8
CC	GO:0000151	ubiquitin ligase complex	57/2178	302/19594	4.29547e-05	0.000195328	0.000125259	CDC27/MED24/BRCA1/ERCC8/RAD51/CUL1/RAD18/KEAP1/ANAPC5/CDC23/TRPC4AP/GID8/FZR1/DMAC2/CBLL1/CUL2/UBE2S/ANAPC15/CAND1/RNF8/PCGF1/AUP1/CACYBP/CDC20/DCAF4/CKS2/UBE2D2/TRAF7/DCAF15/DERL1/DCUN1D5/BRCA2/CUL4A/DTL/ATG3/ANAPC1/RMND5A/ELOC/FBXL18/RNF20/PCGF6/BUB1B/CCNF/TMEM183A/MED30/DCAF13/KCTD5/DDB1/CKS1B/FBXO45/GLMN/UBE2C/CDC26/UBE2N/BRCC3/UBE2L3/ANAPC7	57
CC	GO:0000123	histone acetyltransferase complex	23/2178	87/19594	5.5042e-05	0.000248613	0.000159429	PHF20/TAF2/ATXN7L3/MRGBP/TAF6/ENY2/YEATS4/TAF4/TAF5L/ACTL6A/KANSL2/POLE3/TAF5/KAT14/TAF6L/YEATS2/HCFC1/RUVBL1/TAF7/RUVBL2/MCRS1/WDR5/TAF9	23
CC	GO:0000118	histone deacetylase complex	20/2178	72/19594	7.80247e-05	0.000350071	0.000224492	ACTR6/RCOR1/BRMS1L/CSNK2A1/DNTTIP1/RBBP7/HDAC1/SAP130/SINHCAF/ANP32E/MTA2/TAF6L/GATAD2A/ING2/HINT1/HDAC3/BRMS1/RUVBL1/RUVBL2/HDAC2	20
CC	GO:0000974	Prp19 complex	7/2178	12/19594	9.90395e-05	0.000438511	0.000281206	RBM22/CDC5L/CRNKL1/HSPA8/PRPF19/BCAS2/CTNNBL1	7
CC	GO:0044615	nuclear pore nuclear basket	7/2178	12/19594	9.90395e-05	0.000438511	0.000281206	NUP98/ENY2/NUP153/PCID2/CETN3/NUP35/MAD2L1	7
CC	GO:1990204	oxidoreductase complex	28/2178	120/19594	0.000103048	0.000453276	0.000290675	NDUFAB1/NDUFS1/DLD/IDH3B/OGDH/FOXRED1/PDHX/SDHB/DLST/PDHA1/LDHA/NDUFB5/SDHC/NDUFB11/NDUFB9/DLAT/NDUFS2/NDUFB6/RRM1/NDUFV1/UQCRFS1/RRM2/UQCRH/CYC1/NDUFA12/NDUFA6/NDUFA4/NDUFS3	28
CC	GO:0030176	integral component of endoplasmic reticulum membrane	35/2178	164/19594	0.000107146	0.00046824	0.000300271	ELOVL5/HSPA5/SLC27A5/PIGS/EMC9/HM13/PIGU/BFAR/TBL2/CCDC47/BNIP1/AUP1/SLC35B1/PIGT/ERGIC3/CANX/EMC1/EMC4/EMC8/DERL1/PREB/TEX261/EBP/ABCB9/SLC35B2/CAMLG/MMGT1/DPAGT1/DHCR7/RCE1/CALR/FITM2/GPAA1/SLC35B4/HACD2	35
CC	GO:0101002	ficolin-1-rich granule	38/2178	185/19594	0.00013037	0.000566056	0.000362998	PSMB1/HSP90AA1/HUWE1/DYNLL1/HSP90AB1/PSMD7/GPI/PDAP1/PSMD3/KPNB1/PSMD11/HSPA8/LTA4H/CAND1/PSMD14/PRDX4/ACLY/DIAPH1/PSMB7/PSMA5/ILF2/DYNC1LI1/CCT8/PSMC2/VCP/PSMC3/EEF2/CANT1/PGAM1/PSMD2/KCMF1/IMPDH2/PSMD13/HMGB1/PPIA/XRCC6/PSMD12/PNP	38
CC	GO:0005741	mitochondrial outer membrane	41/2178	205/19594	0.000134004	0.000578107	0.000370726	AGK/DNAJC11/COASY/VDAC3/EXD2/STARD7/TOMM22/MIEF1/SAMM50/ARMC1/CHCHD3/MTCH2/HSPA9/MFN2/MSTO1/TOMM40/RTN4IP1/IMMT/HAX1/RPS27A/CISD2/NIPSNAP2/QTRT2/TOMM70/ATP5MC3/AGPAT5/MTERF3/CHCHD6/VDAC2/MTX1/TOMM20/APOO/BRI3BP/PPP1CC/MTOR/OPA1/VDAC1/PHB2/UBA52/PGAM5/MYO19	41
CC	GO:1905354	exoribonuclease complex	9/2178	20/19594	0.000136024	0.000583085	0.000373919	LAS1L/EXOSC5/EXOSC3/EXOSC9/EXOSC2/PNPT1/SUPV3L1/EXOSC10/EXOSC4	9
CC	GO:0008023	transcription elongation factor complex	15/2178	48/19594	0.000142742	0.000608008	0.000389901	PAF1/ELOA/NUFIP1/SUPT16H/NELFCD/SUPT6H/TTF2/ZC3H8/SSRP1/ELOC/LEO1/CDK12/SUPT5H/CTR9/NELFE	15
CC	GO:0045171	intercellular bridge	20/2178	75/19594	0.000144797	0.000612885	0.000393028	NCAPH2/AGBL5/TPX2/CDC6/CDC7/PCIF1/FAM83D/PYCR3/RAB35/KIF20A/TMEM9/DNAJC8/AAMP/CDCA8/CEP55/KIF20B/SNRNP25/NUDCD2/DCTN1/SRA1	20
CC	GO:0000177	cytoplasmic exosome (RNase complex)	7/2178	13/19594	0.000193954	0.00079592	0.000510404	EXOSC5/EXOSC3/EXOSC9/EXOSC2/PNPT1/SUPV3L1/EXOSC4	7
CC	GO:0005675	transcription factor TFIIH holo complex	7/2178	13/19594	0.000193954	0.00079592	0.000510404	MNAT1/ERCC2/GTF2H3/CDK7/MMS19/ERCC3/GTF2H2C	7
CC	GO:0043240	Fanconi anaemia nuclear complex	7/2178	13/19594	0.000193954	0.00079592	0.000510404	FANCE/FAAP24/FANCC/CENPX/FANCB/FANCA/FANCM	7
CC	GO:0045120	pronucleus	7/2178	13/19594	0.000193954	0.00079592	0.000510404	RIF1/AURKA/EZH2/CBX1/TBP/CENPF/CCNA2	7
CC	GO:1990498	mitotic spindle microtubule	7/2178	13/19594	0.000193954	0.00079592	0.000510404	HAUS8/TUBG1/HAUS2/HAUS6/HAUS1/HNRNPU/HAUS5	7
CC	GO:0032797	SMN complex	6/2178	10/19594	0.000264406	0.00107846	0.000691589	STRAP/DDX20/GEMIN5/GEMIN2/GEMIN6/GEMIN4	6
CC	GO:0031227	intrinsic component of endoplasmic reticulum membrane	35/2178	172/19594	0.000284077	0.00115171	0.000738565	ELOVL5/HSPA5/SLC27A5/PIGS/EMC9/HM13/PIGU/BFAR/TBL2/CCDC47/BNIP1/AUP1/SLC35B1/PIGT/ERGIC3/CANX/EMC1/EMC4/EMC8/DERL1/PREB/TEX261/EBP/ABCB9/SLC35B2/CAMLG/MMGT1/DPAGT1/DHCR7/RCE1/CALR/FITM2/GPAA1/SLC35B4/HACD2	35
CC	GO:0042470	melanosome	25/2178	109/19594	0.000313517	0.00125593	0.0008054	HSPA5/ATP1B3/HSP90AA1/GANAB/HSP90AB1/DNAJC5/AHCY/YWHAE/HSPA8/RAB35/CCT4/PRDX1/CANX/RAN/GGH/PDIA6/ATP1A1/RPN1/YWHAZ/HSP90B1/YWHAB/SLC3A2/FASN/NAP1L1/SND1	25
CC	GO:0048770	pigment granule	25/2178	109/19594	0.000313517	0.00125593	0.0008054	HSPA5/ATP1B3/HSP90AA1/GANAB/HSP90AB1/DNAJC5/AHCY/YWHAE/HSPA8/RAB35/CCT4/PRDX1/CANX/RAN/GGH/PDIA6/ATP1A1/RPN1/YWHAZ/HSP90B1/YWHAB/SLC3A2/FASN/NAP1L1/SND1	25
CC	GO:0005744	TIM23 mitochondrial import inner membrane translocase complex	7/2178	14/19594	0.000350679	0.0013642	0.000874831	TIMM21/TIMM50/GRPEL1/TIMM17A/TIMM10/GRPEL2/TIMM23	7
CC	GO:0030677	ribonuclease P complex	7/2178	14/19594	0.000350679	0.0013642	0.000874831	HSD17B10/POP1/POP4/RPP40/RPP30/POP7/TRMT10C	7
CC	GO:0031616	spindle pole centrosome	7/2178	14/19594	0.000350679	0.0013642	0.000874831	NDE1/AURKA/EMD/TBCCD1/DLGAP5/AURKB/NPM1	7
CC	GO:0033276	transcription factor TFTC complex	7/2178	14/19594	0.000350679	0.0013642	0.000874831	TAF2/TAF6/TAF4/TAF5L/TAF5/TAF7/TAF9	7
CC	GO:1990023	mitotic spindle midzone	7/2178	14/19594	0.000350679	0.0013642	0.000874831	KIF18A/KIF20B/CENPE/HNRNPU/AURKB/RCC2/KIF18B	7
CC	GO:0031461	cullin-RING ubiquitin ligase complex	35/2178	175/19594	0.000399569	0.00154546	0.000991067	CDC27/ERCC8/CUL1/KEAP1/ANAPC5/CDC23/TRPC4AP/FZR1/DMAC2/CUL2/UBE2S/ANAPC15/CAND1/CACYBP/CDC20/DCAF4/CKS2/DCAF15/CUL4A/DTL/ANAPC1/ELOC/FBXL18/BUB1B/CCNF/TMEM183A/DCAF13/KCTD5/DDB1/CKS1B/FBXO45/GLMN/UBE2C/CDC26/ANAPC7	35
CC	GO:0022625	cytosolic large ribosomal subunit	16/2178	58/19594	0.000429853	0.00165309	0.00106009	RPL26L1/RPLP0/ZCCHC17/RPL5/FXR2/RPL27/RPL7L1/RPL7/RPL8/MRPL1/RPL35A/RPL23A/RPL10A/UBA52/RPL41/RPL17	16
CC	GO:0019774	proteasome core complex, beta-subunit complex	6/2178	11/19594	0.000526896	0.00199214	0.00127751	PSMB1/PSMB5/PSMB2/PSMB7/PSMB6/PSMB4	6
CC	GO:0031074	nucleocytoplasmic transport complex	6/2178	11/19594	0.000526896	0.00199214	0.00127751	KPNB1/XPO5/RAN/MYBBP1A/SNUPN/KPNA2	6
CC	GO:0031464	Cul4A-RING E3 ubiquitin ligase complex	6/2178	11/19594	0.000526896	0.00199214	0.00127751	ERCC8/TRPC4AP/CUL4A/DTL/DDB1/GLMN	6
CC	GO:0000178	exosome (RNase complex)	8/2178	19/19594	0.000561404	0.00209903	0.00134606	EXOSC5/EXOSC3/EXOSC9/EXOSC2/PNPT1/SUPV3L1/EXOSC10/EXOSC4	8
CC	GO:0032806	carboxy-terminal domain protein kinase complex	8/2178	19/19594	0.000561404	0.00209903	0.00134606	MNAT1/ERCC2/GTF2H3/CDK7/MMS19/ERCC3/CDK12/GTF2H2C	8
CC	GO:0005685	U1 snRNP	11/2178	33/19594	0.00058847	0.00218807	0.00140316	SNRPA/SNRPD3/SNRPC/SNRPD2/SNRPB/SNRPB2/SNRPF/SNRPG/SNRPD1/SNRPE/PRPF40A	11
CC	GO:0031011	Ino80 complex	7/2178	15/19594	0.000594538	0.00219849	0.00140984	YY1/ACTR5/UCHL5/ACTL6A/RUVBL1/RUVBL2/MCRS1	7
CC	GO:0032154	cleavage furrow	15/2178	55/19594	0.000733783	0.00269856	0.00173052	RALA/NDE1/FSD1/KIF20A/ECT2/MASTL/CIT/STAMBP/MEN1/DCTN3/CEP55/PLK4/RACGAP1/PPP1CC/NF2	15
CC	GO:0000176	nuclear exosome (RNase complex)	6/2178	12/19594	0.000954752	0.00343609	0.00220348	EXOSC5/EXOSC3/EXOSC9/EXOSC2/EXOSC10/EXOSC4	6
CC	GO:0000439	transcription factor TFIIH core complex	6/2178	12/19594	0.000954752	0.00343609	0.00220348	MNAT1/ERCC2/GTF2H3/CDK7/ERCC3/GTF2H2C	6
CC	GO:0097504	Gemini of coiled bodies	6/2178	12/19594	0.000954752	0.00343609	0.00220348	DDX20/GEMIN5/GEMIN2/ZPR1/GEMIN6/GEMIN4	6
CC	GO:1990062	RPAP3/R2TP/prefoldin-like complex	6/2178	12/19594	0.000954752	0.00343609	0.00220348	RPAP3/PDRG1/POLR2E/PIH1D1/RUVBL1/RUVBL2	6
CC	GO:0044815	DNA packaging complex	37/2178	198/19594	0.00106176	0.00380088	0.00243741	NCAPD2/DPF1/NCAPH2/SMARCD1/SMC1A/XRCC5/NDC80/SMARCB1/MRGBP/H2AZ2/SMC3/SMARCD2/NCAPG/MACROH2A1/SMC4/CENPA/STAG1/NCAPH/YEATS4/SMARCA4/SLF1/DPF2/ACTL6A/SMC2/NUF2/NCAPG2/TERF1/NCAPD3/SPC25/SPC24/SGO2/H2AZ1/RAD21/RUVBL1/RUVBL2/H2AX/XRCC6	37
CC	GO:0097346	INO80-type complex	9/2178	26/19594	0.00136226	0.00485081	0.00311071	ACTR6/YY1/ACTR5/UCHL5/ACTL6A/ANP32E/RUVBL1/RUVBL2/MCRS1	9
CC	GO:0042788	polysomal ribosome	10/2178	31/19594	0.0013834	0.00490014	0.00314234	DHX9/PNPT1/BTF3/EIF3H/LARP1/RPL8/RPS21/RPL10A/RPS29/RPL41	10
CC	GO:0070469	respirasome	22/2178	101/19594	0.00144394	0.00508782	0.0032627	NDUFAB1/NDUFS1/FOXRED1/COX7A2L/SDHB/NDUFB5/SDHC/NDUFB11/NDUFB9/NDUFS2/NDUFB6/NDUFV1/UQCRFS1/CYCS/UQCRH/C2orf69/COX5A/CYC1/NDUFA12/NDUFA6/NDUFA4/NDUFS3	22
CC	GO:0036064	ciliary basal body	31/2178	161/19594	0.00158498	0.00555568	0.00356273	CFAP20/CDC45/IFT52/MAPRE1/RPGRIP1L/TTC26/B9D1/WRAP73/SSX2IP/CENPF/GLE1/MKKS/CEP250/TUBG1/NPHP4/CEP20/TTLL4/BBS7/NEDD1/TBC1D7/CEP78/CENPJ/CETN3/CCSAP/PSMB4/CFAP157/IFT122/POC1A/ENTR1/RAB8A/RTTN	31
CC	GO:0000800	lateral element	6/2178	13/19594	0.00160687	0.00560321	0.00359321	BRCA1/RAD51/SMC3/BRCA2/INCENP/BLM	6
CC	GO:0022627	cytosolic small ribosomal subunit	12/2178	43/19594	0.00195947	0.00679754	0.0043591	RPS5/RPS16/RPS12/RPS27A/EIF2A/RPS3/RPS21/RPS7/MRPS11/RPS4X/RPS29/UBA52	12
CC	GO:0098803	respiratory chain complex	20/2178	91/19594	0.00207497	0.0071613	0.00459237	NDUFAB1/NDUFS1/FOXRED1/COX7A2L/SDHB/NDUFB5/SDHC/NDUFB11/NDUFB9/NDUFS2/NDUFB6/NDUFV1/UQCRFS1/UQCRH/COX5A/CYC1/NDUFA12/NDUFA6/NDUFA4/NDUFS3	20
CC	GO:0005747	mitochondrial respiratory chain complex I	13/2178	49/19594	0.00213286	0.00724956	0.00464897	NDUFAB1/NDUFS1/FOXRED1/NDUFB5/NDUFB11/NDUFB9/NDUFS2/NDUFB6/NDUFV1/NDUFA12/NDUFA6/NDUFA4/NDUFS3	13
CC	GO:0030964	NADH dehydrogenase complex	13/2178	49/19594	0.00213286	0.00724956	0.00464897	NDUFAB1/NDUFS1/FOXRED1/NDUFB5/NDUFB11/NDUFB9/NDUFS2/NDUFB6/NDUFV1/NDUFA12/NDUFA6/NDUFA4/NDUFS3	13
CC	GO:0045271	respiratory chain complex I	13/2178	49/19594	0.00213286	0.00724956	0.00464897	NDUFAB1/NDUFS1/FOXRED1/NDUFB5/NDUFB11/NDUFB9/NDUFS2/NDUFB6/NDUFV1/NDUFA12/NDUFA6/NDUFA4/NDUFS3	13
CC	GO:0032153	cell division site	17/2178	73/19594	0.00227878	0.00770664	0.00494209	RALA/ANLN/NDE1/FSD1/KIF20A/ECT2/MASTL/CIT/STAMBP/MEN1/DCTN3/TUBGCP4/CEP55/PLK4/RACGAP1/PPP1CC/NF2	17
CC	GO:0016605	PML body	22/2178	105/19594	0.00243292	0.00818676	0.00524998	MRE11/RAD51/HIRA/EIF3E/PIAS4/SUMO1/PARK7/THAP1/RPA1/TDG/NSMCE2/SMC6/TOPBP1/RFWD3/TOP3A/CHEK2/SUMO3/HSF1/SUMO2/BLM/MTOR/DAXX	22
CC	GO:0016581	NuRD complex	6/2178	14/19594	0.00254901	0.00845064	0.0054192	CSNK2A1/RBBP7/HDAC1/MTA2/GATAD2A/HDAC2	6
CC	GO:0090545	CHD-type complex	6/2178	14/19594	0.00254901	0.00845064	0.0054192	CSNK2A1/RBBP7/HDAC1/MTA2/GATAD2A/HDAC2	6
CC	GO:0098554	cytoplasmic side of endoplasmic reticulum membrane	6/2178	14/19594	0.00254901	0.00845064	0.0054192	DNAJA1/HM13/THADA/RPL27/PTPN1/RPS29	6
CC	GO:0000172	ribonuclease MRP complex	5/2178	10/19594	0.00263007	0.00850981	0.00545714	POP1/POP4/RPP40/RPP30/POP7	5
CC	GO:0030681	multimeric ribonuclease P complex	5/2178	10/19594	0.00263007	0.00850981	0.00545714	POP1/POP4/RPP40/RPP30/POP7	5
CC	GO:0031414	N-terminal protein acetyltransferase complex	5/2178	10/19594	0.00263007	0.00850981	0.00545714	NAA50/NAA35/NAA30/NAA15/NAA20	5
CC	GO:0072546	EMC complex	5/2178	10/19594	0.00263007	0.00850981	0.00545714	EMC9/EMC1/EMC4/EMC8/MMGT1	5
CC	GO:0097550	transcription preinitiation complex	5/2178	10/19594	0.00263007	0.00850981	0.00545714	BRF2/GTF2H3/TBP/GTF2E1/ERCC3	5
CC	GO:0000932	P-body	20/2178	93/19594	0.00272153	0.00876358	0.00561988	UPF1/PSMA4/CNOT3/AGO2/LSM4/CAPRIN1/UBAP2/HAX1/POLR2D/CNOT9/YTHDF1/EIF4E/PSMC2/PSMC3/POLR2G/EDC3/CNOT7/TOP1/LSM2/LSM14A	20
CC	GO:0005746	mitochondrial respirasome	20/2178	94/19594	0.00310344	0.00994578	0.00637799	NDUFAB1/NDUFS1/FOXRED1/COX7A2L/SDHB/NDUFB5/SDHC/NDUFB11/NDUFB9/NDUFS2/NDUFB6/NDUFV1/UQCRFS1/UQCRH/COX5A/CYC1/NDUFA12/NDUFA6/NDUFA4/NDUFS3	20
CC	GO:1902562	H4 histone acetyltransferase complex	11/2178	40/19594	0.0033846	0.0107954	0.00692286	PHF20/MRGBP/YEATS4/ACTL6A/KANSL2/YEATS2/HCFC1/RUVBL1/RUVBL2/MCRS1/WDR5	11
CC	GO:0008180	COP9 signalosome	6/2178	15/19594	0.00385198	0.0121708	0.00780486	COPS5/COPS4/COPS3/COPS7B/COPS6/GPS1	6
CC	GO:0010369	chromocenter	6/2178	15/19594	0.00385198	0.0121708	0.00780486	OIP5/CBX1/CDCA8/INCENP/ESCO2/AURKB	6
CC	GO:0000803	sex chromosome	9/2178	30/19594	0.0041407	0.0130219	0.00835065	SMARCB1/MACROH2A1/SUMO1/PLK4/HNRNPU/SMC6/ESCO2/SUZ12/H2AX	9
CC	GO:0120293	dynein axonemal particle	7/2178	20/19594	0.00434252	0.0134071	0.00859769	WDR18/HSP90AB1/DNAAF5/DNAAF2/STIP1/RUVBL1/RUVBL2	7
CC	GO:0000235	astral microtubule	5/2178	11/19594	0.00438272	0.0134071	0.00859769	PAFAH1B1/MAPRE1/KIF18A/CCSAP/KIF18B	5
CC	GO:0005818	aster	5/2178	11/19594	0.00438272	0.0134071	0.00859769	PAFAH1B1/MAPRE1/KIF18A/CCSAP/KIF18B	5
CC	GO:0016580	Sin3 complex	5/2178	11/19594	0.00438272	0.0134071	0.00859769	CSNK2A1/HDAC1/SINHCAF/ING2/HDAC2	5
CC	GO:0034663	endoplasmic reticulum chaperone complex	5/2178	11/19594	0.00438272	0.0134071	0.00859769	HSPA5/DNAJB11/PDIA6/HYOU1/HSP90B1	5
CC	GO:0044545	NSL complex	5/2178	11/19594	0.00438272	0.0134071	0.00859769	PHF20/KANSL2/HCFC1/MCRS1/WDR5	5
CC	GO:0045239	tricarboxylic acid cycle enzyme complex	6/2178	16/19594	0.00558963	0.0170218	0.0109157	DLD/FH/IDH3B/OGDH/DLST/SUCLG1	6
CC	GO:0070847	core mediator complex	8/2178	26/19594	0.00570628	0.0172988	0.0110933	MED24/MED26/MED1/MED6/MED22/MED19/MED30/MED14	8
CC	GO:0016234	inclusion body	16/2178	74/19594	0.00654189	0.019743	0.0126607	DVL2/POLD1/RAD18/KEAP1/XRN2/HSP90AB1/RANGAP1/PSMC6/GYS1/NUP98/NUP153/SLF1/UBQLN1/URB2/BAG5/EEF2	16
CC	GO:1990124	messenger ribonucleoprotein complex	5/2178	12/19594	0.00683127	0.0205243	0.0131618	YBX1/HNRNPA3/PKP3/HNRNPAB/LSM14A	5
CC	GO:0071004	U2-type prespliceosome	6/2178	17/19594	0.00783672	0.0233368	0.0149653	U2AF2/SF3A1/SNRPC/SNRPB/SNRPG/PRPF40A	6
CC	GO:0071010	prespliceosome	6/2178	17/19594	0.00783672	0.0233368	0.0149653	U2AF2/SF3A1/SNRPC/SNRPB/SNRPG/PRPF40A	6
CC	GO:0005677	chromatin silencing complex	5/2178	13/19594	0.0100965	0.0296935	0.0190417	YY1/SUV39H1/EZH2/CBX3/SUZ12	5
CC	GO:0031010	ISWI-type complex	5/2178	13/19594	0.0100965	0.0296935	0.0190417	BAZ1B/HMGXB4/RBBP7/CHRAC1/POLE3	5
CC	GO:0031519	PcG protein complex	9/2178	34/19594	0.0101037	0.0296935	0.0190417	YY1/RBBP7/EZH2/PCGF1/UBAP2L/PCGF6/ASXL1/SUZ12/HDAC2	9
CC	GO:0035371	microtubule plus-end	7/2178	23/19594	0.0101985	0.0298416	0.0191367	SPAG5/MAPRE1/KNSTRN/KIF2C/CKAP5/KIF18B/DCTN1	7
CC	GO:0016592	mediator complex	10/2178	40/19594	0.0104606	0.0304762	0.0195437	MED24/THRAP3/MED26/MED1/MED6/CDK4/MED22/MED19/MED30/MED14	10
CC	GO:0030867	rough endoplasmic reticulum membrane	7/2178	24/19594	0.0130443	0.0378396	0.0242656	CCDC47/UBA1/RPL27/SEC61G/SRPRB/RP9/RPS29	7
CC	GO:0034451	centriolar satellite	20/2178	107/19594	0.0135917	0.0392585	0.0251756	TACC3/WDR62/SPAG5/KEAP1/CEP72/SSX2IP/DLST/UPF3B/DLGAP5/KNSTRN/CEP20/CEP55/HAUS6/CENPU/SASS6/PCNT/TAF1D/PLK1/NUDT21/RAD23A	20
CC	GO:0001741	XY body	5/2178	14/19594	0.0142896	0.0405776	0.0260215	SMARCB1/SUMO1/PLK4/ESCO2/H2AX	5
CC	GO:0008278	cohesin complex	5/2178	14/19594	0.0142896	0.0405776	0.0260215	SMC1A/SMC3/STAG1/SGO2/RAD21	5
CC	GO:0044666	MLL3/4 complex	5/2178	14/19594	0.0142896	0.0405776	0.0260215	RBBP5/PAXIP1/DPY30/WDR5/NCOA6	5
CC	GO:0072687	meiotic spindle	5/2178	14/19594	0.0142896	0.0405776	0.0260215	ASPM/AURKA/FBXO5/BORA/INCENP	5
CC	GO:0080008	Cul4-RING E3 ubiquitin ligase complex	9/2178	36/19594	0.0148108	0.0418809	0.0268572	ERCC8/TRPC4AP/DCAF4/DCAF15/CUL4A/DTL/DCAF13/DDB1/GLMN	9
CC	GO:0005652	nuclear lamina	4/2178	10/19594	0.0184184	0.0512215	0.0328471	SUV39H1/LMNB1/PCNA/EIF6	4
CC	GO:0019908	nuclear cyclin-dependent protein kinase holoenzyme complex	4/2178	10/19594	0.0184184	0.0512215	0.0328471	MNAT1/BCCIP/CDK7/CDK12	4
CC	GO:0072588	box H/ACA RNP complex	4/2178	10/19594	0.0184184	0.0512215	0.0328471	GAR1/DKC1/NHP2/NOLC1	4
CC	GO:0120103	centriolar subdistal appendage	4/2178	10/19594	0.0184184	0.0512215	0.0328471	KIF2A/CEP128/ODF2/DCTN1	4
CC	GO:0005665	RNA polymerase II, core complex	5/2178	15/19594	0.0195084	0.0535884	0.034365	POLR2E/POLR2F/POLR2D/POLR2H/POLR2G	5
CC	GO:0048188	Set1C/COMPASS complex	5/2178	15/19594	0.0195084	0.0535884	0.034365	RBBP5/BOD1/DPY30/HCFC1/WDR5	5
CC	GO:0071565	nBAF complex	5/2178	15/19594	0.0195084	0.0535884	0.034365	DPF1/SMARCD1/SMARCB1/SMARCA4/DPF2	5
CC	GO:0000124	SAGA complex	6/2178	21/19594	0.0233372	0.0633304	0.0406123	ATXN7L3/TAF6/ENY2/TAF5L/TAF6L/TAF9	6
CC	GO:0005753	mitochondrial proton-transporting ATP synthase complex	6/2178	21/19594	0.0233372	0.0633304	0.0406123	ATP5F1B/ATP5PB/ATP5F1A/ATP5MC3/ATP5MC1/ATP5F1C	6
CC	GO:0043073	germ cell nucleus	6/2178	21/19594	0.0233372	0.0633304	0.0406123	TRIP13/AURKA/TCFL5/RAN/TOPBP1/H2AX	6
CC	GO:1990752	microtubule end	8/2178	33/19594	0.0251767	0.0680479	0.0436375	ASPM/SPAG5/MAPRE1/KNSTRN/KIF2C/CKAP5/KIF18B/DCTN1	8
CC	GO:0000930	gamma-tubulin complex	5/2178	16/19594	0.0258351	0.0692711	0.0444219	BRCA1/TUBG1/TUBGCP4/CENPJ/MZT1	5
CC	GO:0001673	male germ cell nucleus	5/2178	16/19594	0.0258351	0.0692711	0.0444219	TRIP13/TCFL5/RAN/TOPBP1/H2AX	5
CC	GO:0000109	nucleotide-excision repair complex	4/2178	11/19594	0.0264388	0.0703294	0.0451005	ERCC8/POLD1/XRCC1/ERCC3	4
CC	GO:0038201	TOR complex	4/2178	11/19594	0.0264388	0.0703294	0.0451005	TTI1/RPTOR/MLST8/MTOR	4
CC	GO:0045259	proton-transporting ATP synthase complex	6/2178	22/19594	0.0291514	0.0772399	0.0495321	ATP5F1B/ATP5PB/ATP5F1A/ATP5MC3/ATP5MC1/ATP5F1C	6
CC	GO:0000795	synaptonemal complex	9/2178	41/19594	0.0333322	0.0876273	0.0561933	BRCA1/RAD51/CCNB1IP1/SMC3/BRCA2/INCENP/RAD21/PLK1/BLM	9
CC	GO:0099086	synaptonemal structure	9/2178	41/19594	0.0333322	0.0876273	0.0561933	BRCA1/RAD51/CCNB1IP1/SMC3/BRCA2/INCENP/RAD21/PLK1/BLM	9
CC	GO:0120111	neuron projection cytoplasm	16/2178	89/19594	0.0352897	0.0924124	0.0592619	PAFAH1B1/KIF1B/AP3D1/KIF4A/RANGAP1/ZC3H14/KIF3B/PQBP1/SFPQ/CANX/AP3B1/SOD1/HNRNPU/DYNC1H1/HNRNPAB/OPA1	16
CC	GO:0005640	nuclear outer membrane	7/2178	29/19594	0.0360378	0.0938126	0.0601598	ENO1/ITPR3/EMD/SMPD4/LRPPRC/SIGMAR1/DHCR7	7
CC	GO:0042405	nuclear inclusion body	4/2178	12/19594	0.0362426	0.0938126	0.0601598	RAD18/NUP98/NUP153/SLF1	4
CC	GO:0071564	npBAF complex	4/2178	12/19594	0.0362426	0.0938126	0.0601598	SMARCD1/SMARCB1/SMARCA4/ACTL6A	4
MF	GO:0140098	catalytic activity, acting on RNA	160/2157	388/18410	1.06356e-50	9.55076e-48	7.36655e-48	UPF1/DHX33/ELAC2/LARS2/POLR3B/ANGEL1/SARS1/NSUN2/METTL1/MTREX/DDX20/KARS1/DHX8/IARS2/FTSJ1/POLR1A/JMJD6/BUD23/EXOSC5/DDX1/EXD2/DIMT1/METTL2A/DDX18/XRN2/DDX24/AARS1/POLR2E/POLR2F/RTCB/POLR3H/TRMU/ALKBH1/APEX1/PCIF1/DHX35/EARS2/RPAP1/POP1/POP4/FBL/DDX49/POLR1F/GARS1/EXOSC3/DDX50/FTSJ3/DHX15/PUS3/CARS1/DDX55/POLR3G/TARS1/RARS1/FARSB/ERI3/DARS2/PPP1R8/POLR1G/CPSF3/RCL1/DDX54/DDX39A/METTL8/EXOSC9/AGO2…	160
MF	GO:0016887	ATP hydrolysis activity	128/2157	325/18410	3.83474e-38	1.7218e-35	1.32803e-35	UPF1/DHX33/PSMC4/DDX11/MTREX/HSPA5/RFC2/KIF1B/DDX20/DHX8/KIF2A/TRIP13/SMC1A/MCM2/MCM6/KIF22/DDX1/HSP90AA1/ORC1/RAD54L/DDX18/DDX24/MSH2/HSP90AB1/MCM5/PSMC6/PSMC1/CHD8/KIF3B/DHX35/MCM4/ERCC2/DDX49/DDX50/TWNK/SMC3/DHX15/HSPA8/DDX55/RFC5/MCM3/KIF20A/HSPA9/SMC4/CCT4/KIF14/TCP1/KIF18A/PMS2/DDX54/DDX39A/DDX27/WRNIP1/DDX31/MKKS/MCM8/TRAP1/SMARCA4/FIGNL1/MORC2/CCT7/ABCB10/DHX9/DDX56/BRIP1/YME1L1/SMC2/KIF2…	128
MF	GO:0043021	ribonucleoprotein complex binding	78/2157	150/18410	1.05478e-33	3.1573e-31	2.43524e-31	DHX33/STRAP/HSPA5/UNG/SNRPA/ITCH/GEMIN5/MTIF2/GCN1/PES1/PRMT5/SRP54/PRPF6/PQBP1/NOMO3/NOMO1/TIMM50/PRPF31/DNAJC2/EZH2/EIF4H/C1QBP/CCDC47/CPSF6/MRPS27/RPN2/ETF1/XPO5/SNRPB/SNRPB2/NCLN/PTCD3/EEFSEC/SEC61G/EIF5A/ERAL1/EIF2S1/DHX9/TACO1/DERL1/OLA1/WDR12/EIF4A3/SERBP1/NVL/SNRPG/EIF2A/YTHDF1/HNRNPU/OXA1L/LARP1/MALSU1/MAIP1/NAA15/ABCE1/NOLC1/SNRPD1/EEF2/SRP68/ZNF598/LETM1/PPIH/PPP1CA/EIF1/SRP72/CKAP5/EI…	78
MF	GO:0140097	catalytic activity, acting on DNA	94/2157	222/18410	3.29885e-31	7.40592e-29	5.71222e-29	UPF1/DDX11/MRE11/TDP1/RFC2/RAD51/POLQ/POLD1/NTHL1/XRCC1/MCM2/MCM6/UNG/POLD3/XRCC5/DDX1/EXD2/RAD54L/MSH2/MCM5/POLE2/ALKBH1/APEX1/CHD8/POLA1/CHRAC1/MCM4/ERCC2/LIG1/TWNK/SMC3/RAD51C/NEIL3/PTGES3/RFC5/MCM3/RAD1/MSH6/TTF2/DCLRE1B/TENT4B/ZRANB3/WRNIP1/MGME1/MCM8/SMARCA4/MBD4/DNMT1/DKC1/TOP2A/PCNA/RFC3/CDK7/DHX9/BRIP1/DSCC1/APTX/DNA2/SMARCAL1/TDG/PIF1/POLG/G3BP1/TERF1/TATDN1/POLE3/RPS3/RAD17/SUPV3L1/REC…	94
MF	GO:0003697	single-stranded DNA binding	63/2157	120/18410	8.94631e-28	1.60676e-25	1.2393e-25	SPRTN/DDX11/TDP1/RAD51/MCM10/YBX1/RAD18/MCM2/MCM6/WBP11/RAD54L/CDC45/MSH2/MCM5/POLA1/MCM4/SSBP1/RPA3/TWNK/NEIL3/RAD51AP1/MCM3/SUB1/SMC4/ZRANB3/PMS2/HNRNPA2B1/HROB/MCM8/RPA1/RNF138/HNRNPA1/DHX9/SMC2/APTX/LRPPRC/SMARCAL1/NABP2/BRCA2/HSPD1/PURB/TERF1/REXO4/HNRNPU/RECQL4/NUP35/SMC6/POLR2H/HMGB2/MCM7/POLR2G/CNBP/TOP3A/RAD23A/HMCES/HSF1/RAD51D/POLR3C/HMGB1/LONP1/BLM/TOP1/TSN	63
MF	GO:0004386	helicase activity	72/2157	155/18410	3.14683e-27	4.70976e-25	3.63266e-25	UPF1/DHX33/DDX11/MRE11/MTREX/RFC2/RAD51/POLQ/DDX20/DHX8/MCM2/MCM6/XRCC5/DDX1/RAD54L/DDX18/DDX24/MCM5/CHD8/DHX35/MCM4/ERCC2/DDX49/DDX50/TWNK/DHX15/DDX55/RFC5/MCM3/TTF2/HELLS/DDX54/DDX39A/DDX27/WRNIP1/DDX31/MCM8/SMARCA4/RFC3/DHX9/DDX56/BRIP1/DSCC1/DNA2/SMARCAL1/PIF1/EIF4A3/SNRNP200/DDX46/G3BP1/DHX37/SUPV3L1/RECQL4/ERCC3/DHX57/RFC4/DDX21/MCM7/DDX23/RUVBL1/DDX10/DDX28/RUVBL2/DDX41/DDX51/ERCC6L/FANCM/…	72
MF	GO:0140101	catalytic activity, acting on a tRNA	61/2157	125/18410	1.04247e-24	1.33733e-22	1.03149e-22	ELAC2/LARS2/SARS1/NSUN2/METTL1/KARS1/IARS2/FTSJ1/METTL2A/AARS1/TRMU/ALKBH1/EARS2/POP1/POP4/GARS1/PUS3/CARS1/TARS1/RARS1/FARSB/DARS2/METTL8/AARS2/RPP40/DTD1/TRMT5/DTD2/QRSL1/LRRC47/LARS1/NARS1/YARS1/EPRS1/NARS2/YARS2/PTRH2/DUS3L/TARS2/FARS2/RPP30/QTRT2/WDR4/PARS2/TRMT61A/MARS1/MRPL58/HARS1/TSEN34/TRMT61B/POP7/TRMT10C/PUS1/FARSA/TRMT12/IARS1/TYW1/VARS1/METTL6/MARS2/GATC	61
MF	GO:0090079	translation regulator activity, nucleic acid binding	54/2157	108/18410	1.13399e-22	1.23015e-20	9.48822e-21	EIF2B3/EIF3I/MTIF2/GCN1/EIF3L/EIF3D/EIF5/GSPT1/EIF3J/EIF3E/EEF1D/EIF3B/EIF4H/EIF3A/EIF2B1/HBS1L/EIF4G1/EEF1B2/EIF2B4/EIF2B2/ETF1/PAIP2/COPS5/AGO2/EIF2S2/EIF2S3/EIF3G/EEFSEC/EIF5A/EIF2S1/DENR/EIF2A/EIF2B5/EIF3H/EIF3M/CELF1/EIF4E/LARP1/EEF2/MRPL58/GFM1/EIF1AX/EIF1/EIF1AD/EIF3F/TYMS/SHMT1/TUFM/EIF3K/SHMT2/EIF3C/ABCF1/DHFR/EIF6	54
MF	GO:0008135	translation factor activity, RNA binding	47/2157	84/18410	1.23289e-22	1.23015e-20	9.48822e-21	EIF2B3/EIF3I/MTIF2/GCN1/EIF3L/EIF3D/EIF5/GSPT1/EIF3J/EIF3E/EEF1D/EIF3B/EIF4H/EIF3A/EIF2B1/HBS1L/EIF4G1/EEF1B2/EIF2B4/EIF2B2/ETF1/COPS5/AGO2/EIF2S2/EIF2S3/EIF3G/EEFSEC/EIF5A/EIF2S1/DENR/EIF2A/EIF2B5/EIF3H/EIF3M/EIF4E/EEF2/MRPL58/GFM1/EIF1AX/EIF1/EIF1AD/EIF3F/TUFM/EIF3K/EIF3C/ABCF1/EIF6	47
MF	GO:0008094	ATP-dependent activity, acting on DNA	51/2157	103/18410	3.04005e-21	2.72997e-19	2.10564e-19	UPF1/DDX11/MRE11/RFC2/RAD51/POLQ/MCM2/MCM6/XRCC5/DDX1/RAD54L/MSH2/MCM5/CHD8/MCM4/ERCC2/TWNK/SMC3/RAD51C/RFC5/MCM3/MSH6/TTF2/WRNIP1/MCM8/SMARCA4/TOP2A/RFC3/CDK7/DHX9/BRIP1/DSCC1/DNA2/SMARCAL1/PIF1/G3BP1/RAD17/SUPV3L1/RECQL4/ERCC3/RFC4/MCM7/RUVBL1/ATAD5/RUVBL2/RAD51D/ERCC6L/FANCM/XRCC6/XRCC2/BLM	51
MF	GO:0003743	translation initiation factor activity	34/2157	51/18410	3.38609e-20	2.76428e-18	2.13211e-18	EIF2B3/EIF3I/MTIF2/EIF3L/EIF3D/EIF5/EIF3J/EIF3E/EIF3B/EIF4H/EIF3A/EIF2B1/EIF4G1/EIF2B4/EIF2B2/COPS5/AGO2/EIF2S2/EIF2S3/EIF3G/EIF2S1/DENR/EIF2A/EIF2B5/EIF3H/EIF3M/EIF4E/EIF1AX/EIF1/EIF1AD/EIF3F/EIF3K/EIF3C/EIF6	34
MF	GO:0000049	tRNA binding	40/2157	72/18410	2.57417e-19	1.92633e-17	1.48579e-17	SARS1/NSUN2/METTL1/KARS1/IARS2/ELP1/HSD17B10/AARS1/TRMU/ALKBH1/EARS2/CARS1/MRPS27/TARS1/RARS1/DARS2/XPO5/AARS2/DTD1/DTD2/EIF2S3/EEFSEC/YARS1/NAT10/SSB/YARS2/EIF2A/FARS2/AIMP1/RPUSD4/MARS1/ELP5/TRMT10C/CTU2/PUS1/FARSA/RPL35A/XPOT/IARS1/YRDC	40
MF	GO:0003735	structural constituent of ribosome	67/2157	181/18410	7.9734e-19	5.50778e-17	4.24818e-17	RPL26L1/MRPS35/MRPL22/RPS5/RPLP0/MRPS33/MRPS18A/RPS16/MRPL4/MRPL32/MRPL51/MRPL18/RPS12/MRPS30/MRPL3/MRPL19/MRPL37/MRPS14/MRPS2/RPL5/MRPS7/MRPS12/RPL27/MRPL35/DAP3/MRPL44/MRPS9/MRPL47/MRPL15/RSL24D1/MRPL9/RPS27A/MRPS5/RPL7L1/RPL7/RPS3/MRPL49/MRPL17/MRPL10/RPL8/MRPL16/MRPL1/MRPL36/RPS21/RPS7/MRPL13/MRPL52/MRPL11/MRPS22/MRPL14/MRPS23/MRPS11/MRPS16/RPL35A/MRPL30/MRPL21/RPS4X/RPL23A/RPL10A/MRPS18B/RPS…	67
MF	GO:0004812	aminoacyl-tRNA ligase activity	29/2157	41/18410	1.59192e-18	9.5303e-17	7.35076e-17	LARS2/SARS1/KARS1/IARS2/AARS1/EARS2/GARS1/CARS1/TARS1/RARS1/FARSB/DARS2/AARS2/LRRC47/LARS1/NARS1/YARS1/EPRS1/NARS2/YARS2/TARS2/FARS2/PARS2/MARS1/HARS1/FARSA/IARS1/VARS1/MARS2	29
MF	GO:0016875	ligase activity, forming carbon-oxygen bonds	29/2157	41/18410	1.59192e-18	9.5303e-17	7.35076e-17	LARS2/SARS1/KARS1/IARS2/AARS1/EARS2/GARS1/CARS1/TARS1/RARS1/FARSB/DARS2/AARS2/LRRC47/LARS1/NARS1/YARS1/EPRS1/NARS2/YARS2/TARS2/FARS2/PARS2/MARS1/HARS1/FARSA/IARS1/VARS1/MARS2	29
MF	GO:0016874	ligase activity	62/2157	165/18410	6.75191e-18	3.60599e-16	2.78132e-16	LARS2/SARS1/KARS1/IARS2/ITCH/AACS/SLC27A5/CAD/AARS1/RTCB/MTHFD1/GSS/EARS2/LIG1/GARS1/CARS1/ATP5F1B/TARS1/RARS1/PCCB/TTL/FARSB/ATP5PB/DARS2/MTHFD1L/MOCS3/AARS2/UBA2/PAICS/QRSL1/LRRC47/UBA1/ACSS2/LARS1/NARS1/YARS1/TTLL4/EPRS1/NARS2/ASNSD1/YARS2/SAE1/TARS2/FARS2/ATP5F1A/GART/NAE1/PARS2/SUCLG1/GMPS/ATP5F1C/MARS1/HARS1/CTPS1/PC/PFAS/FARSA/IARS1/VARS1/MARS2/GATC/ACACA	62
MF	GO:0030515	snoRNA binding	25/2157	32/18410	6.82648e-18	3.60599e-16	2.78132e-16	NOP58/WDR3/XRCC5/NUFIP1/NOP14/SNU13/NOP56/NUDT1/UTP6/GAR1/BYSL/RRP9/UTP25/HEATR1/DKC1/IMP4/NHP2/DHX37/NUDT5/DDX21/BMS1/NOLC1/TSR1/TBL3/PRKDC	25
MF	GO:0008186	ATP-dependent activity, acting on RNA	39/2157	79/18410	1.62485e-16	8.1062e-15	6.25235e-15	UPF1/DHX33/DDX11/MTREX/DDX20/DHX8/DDX1/DDX18/DDX24/DHX35/DDX49/DDX50/DHX15/DDX55/DDX54/DDX39A/DDX27/DDX31/DHX9/DDX56/BRIP1/PIF1/EIF4A3/SNRNP200/DDX46/G3BP1/DHX37/SUPV3L1/DHX57/DDX21/DDX23/DDX10/DDX28/DDX41/DDX51/FANCM/SKIV2L/DHX16/DDX52	39
MF	GO:0003678	DNA helicase activity	37/2157	72/18410	1.77898e-16	8.40804e-15	6.48516e-15	UPF1/DDX11/MRE11/RFC2/RAD51/POLQ/MCM2/MCM6/XRCC5/RAD54L/MCM5/CHD8/MCM4/ERCC2/TWNK/RFC5/MCM3/WRNIP1/MCM8/RFC3/DHX9/BRIP1/DSCC1/DNA2/PIF1/G3BP1/SUPV3L1/RECQL4/ERCC3/RFC4/MCM7/RUVBL1/RUVBL2/ERCC6L/FANCM/XRCC6/BLM	37
MF	GO:0003684	damaged DNA binding	35/2157	68/18410	1.09072e-15	4.89735e-14	3.77735e-14	BRCA1/POLQ/POLD1/NTHL1/RAD18/XRCC1/UNG/XRCC5/MSH2/APEX1/ERCC2/RPA3/NEIL3/RAD1/MSH6/DCLRE1B/AUNIP/RPA1/PCNA/APTX/TDG/RPS3/RECQL4/SMC6/ERCC3/HMGB2/DDB1/FEN1/RAD23A/KDM4D/H2AX/HMGB1/XRCC6/BLM/DCLRE1A	35
MF	GO:0019843	rRNA binding	34/2157	66/18410	2.70091e-15	1.15496e-13	8.90826e-14	RPS5/KDM2B/RPLP0/MRPS18A/MRPL18/MRPS27/BRIX1/RPF1/UTP25/FASTKD2/RPL5/MRPS7/EMG1/PTCD3/ERAL1/TACO1/IMP4/UTP23/RPS3/RPL8/RPUSD4/DDX21/MRPL16/MRPL11/RRS1/MRPS11/DDX28/RPF2/RPS4X/RPL23A/FASTKD5/MRPS17/MRPL20/RCC1L	34
MF	GO:0003724	RNA helicase activity	37/2157	77/18410	2.94685e-15	1.20285e-13	9.27763e-14	UPF1/DHX33/MTREX/DDX20/DHX8/DDX1/DDX18/DDX24/DHX35/DDX49/DDX50/DHX15/DDX55/DDX54/DDX39A/DDX27/DDX31/DHX9/DDX56/BRIP1/EIF4A3/SNRNP200/DDX46/G3BP1/DHX37/SUPV3L1/DHX57/DDX21/DDX23/DDX10/DDX28/DDX41/DDX51/FANCM/SKIV2L/DHX16/DDX52	37
MF	GO:0043022	ribosome binding	35/2157	70/18410	3.49044e-15	1.36279e-13	1.05113e-13	HSPA5/GEMIN5/GCN1/NOMO3/NOMO1/DNAJC2/C1QBP/CCDC47/MRPS27/RPN2/ETF1/NCLN/SEC61G/EIF5A/EIF2S1/TACO1/OLA1/SERBP1/EIF2A/YTHDF1/OXA1L/MAIP1/NAA15/EEF2/SRP68/ZNF598/LETM1/SRP72/EIF3K/EIF3C/NOMO2/PRMT3/MTOR/BAG6/EIF6	35
MF	GO:0004518	nuclease activity	64/2157	204/18410	4.75149e-14	1.77785e-12	1.37126e-12	LAS1L/ELAC2/ANGEL1/MRE11/TDP1/POLD1/NTHL1/XRCC1/EXOSC5/DDX1/EXD2/XRN2/APEX1/POP1/POP4/EXOSC3/RAD51C/RAD1/ERI3/PPP1R8/DCLRE1B/CPSF3/RCL1/ZRANB3/PMS2/EXOSC9/AGO2/RPP40/MGME1/MBD4/EXOSC2/TOE1/APTX/PNPT1/DBR1/DNA2/POLG/NOB1/ISG20L2/G3BP1/TATDN1/REXO4/RPP30/RPS3/EME1/FEN1/APEX2/DFFB/TSEN34/EXOSC10/POP7/EXO1/POLE/GEN1/EXOSC4/EDC3/AEN/FANCM/SND1/CNOT7/TSEN15/DCLRE1A/TSN/NME1	64
MF	GO:0017116	single-stranded DNA helicase activity	18/2157	23/18410	3.05281e-13	1.09657e-11	8.45789e-12	RFC2/RAD51/POLQ/MCM2/MCM6/MCM5/MCM4/RFC5/MCM3/WRNIP1/MCM8/RFC3/DHX9/DSCC1/DNA2/PIF1/RFC4/MCM7	18
MF	GO:0051082	unfolded protein binding	45/2157	121/18410	3.44115e-13	1.18852e-11	9.16711e-12	NUDCD3/HSPA5/HSP90AA1/DNAJA1/PDRG1/NUDC/DNAJB11/HSP90AB1/PFDN4/DNAJA3/GRPEL1/HSPA8/PTGES3/HSPA9/PFDN1/TTC1/HTRA2/CCT4/TCP1/MKKS/TRAP1/CANX/CCT7/AFG3L2/HSPD1/CCT6A/HYOU1/CCT5/HEATR3/VBP1/CCT8/CHAF1B/CCT3/GRPEL2/CCT2/HSP90B1/CHAF1A/NUDCD2/TOMM20/CALR/NPM1/RUVBL2/HSPA14/SRSF10/PPIA	45
MF	GO:0016796	exonuclease activity, active with either ribo- or deoxyribonucleic acids and producing 5'-phosphomonoesters	28/2157	59/18410	1.01833e-11	3.3869e-10	2.61233e-10	ANGEL1/MRE11/POLD1/EXOSC5/EXD2/XRN2/APEX1/EXOSC3/RAD1/ERI3/DCLRE1B/CPSF3/EXOSC9/MGME1/EXOSC2/TOE1/APTX/PNPT1/ISG20L2/TATDN1/FEN1/APEX2/EXOSC10/EXO1/POLE/EXOSC4/CNOT7/DCLRE1A	28
MF	GO:0016779	nucleotidyltransferase activity	45/2157	132/18410	1.1472e-11	3.67923e-10	2.83781e-10	POLR3B/POLQ/POLD1/KARS1/COASY/POLR1A/POLD3/POLR2E/POLR2F/POLR3H/POLE2/POLA1/RPAP1/CHRAC1/POLR1F/MTPAP/PTGES3/CMAS/POLR3G/POLR1G/TENT4B/MOCS3/POLR1B/DKC1/POLR3F/POLR1E/PNPT1/POLG/POLR2D/TERF1/POLE3/POLR3A/FLAD1/POLR3K/POLR2H/NUDT5/POLR2G/POLR3D/GPHN/CTU2/POLE/POLR3C/YRDC/PRIM1/CRCP	45
MF	GO:0044389	ubiquitin-like protein ligase binding	80/2157	317/18410	1.4464e-11	4.47885e-10	3.45455e-10	SLC25A5/RALA/BRCA1/HSPA5/CUL1/USP13/RAD18/UBE2T/ITCH/XRCC5/HSP90AA1/DNAJA1/AURKA/HSP90AB1/RANGAP1/PSMA3/TRIB3/HM13/AXIN1/GPI/PIAS4/CUL2/CASC3/YWHAE/HSPA8/TPI1/RNF8/HSPA9/AUP1/SUMO1/CACYBP/SCAMP3/MFN2/PRDX6/TCP1/RPL5/TUBA1B/TRIM28/PRR7/UBE2G1/HSPBP1/SLF1/CCNB1/DERL1/LRPPRC/CUL4A/WRAP53/RPS27A/HSPD1/MFHAS1/RNF20/NDUFS2/NAE1/SMC6/CAMLG/YWHAZ/VCP/BAG5/CCT2/OTUB1/PA2G4/PSMD1/GLMN/UBE2C/UBE2N/CALR/NPLO…	80
MF	GO:0004527	exonuclease activity	33/2157	80/18410	1.79755e-11	5.38066e-10	4.15012e-10	ANGEL1/MRE11/TDP1/POLD1/EXOSC5/DDX1/EXD2/XRN2/APEX1/EXOSC3/RAD1/ERI3/DCLRE1B/CPSF3/EXOSC9/MGME1/EXOSC2/TOE1/APTX/PNPT1/POLG/ISG20L2/TATDN1/REXO4/FEN1/APEX2/EXOSC10/EXO1/POLE/EXOSC4/AEN/CNOT7/DCLRE1A	33
MF	GO:0042393	histone binding	67/2157	250/18410	3.94052e-11	1.14148e-09	8.80428e-10	BAZ1B/NCAPD2/DPF1/PSME4/MCM2/SART3/HIRA/TTLL12/L3MBTL2/CHD8/RBBP7/PIH1D1/ASF1B/GRWD1/DNAJC2/NPM3/CBX1/SUPT6H/RNF8/MSH6/RBBP5/SET/CBX3/HJURP/CKS2/DEK/YEATS4/SMARCA4/HAT1/NASP/MORC4/DPF2/PWP1/ANP32B/SBNO1/ANP32A/WRAP53/CARM1/ANP32E/NCAPG2/SSRP1/NCAPD3/RNF20/ATAD2/CHAF1B/TONSL/LRWD1/YEATS2/BRD7/ING2/COPRS/CKS1B/SUZ12/TAF7/RCC1/NPM1/NAP1L1/PTMA/H2AX/NOC2L/WDR5/IPO9/PRMT6/DAXX/IPO7/DNAJC9/UHRF1	67
MF	GO:0031625	ubiquitin protein ligase binding	74/2157	298/18410	1.87431e-10	5.24898e-09	4.04856e-09	SLC25A5/RALA/BRCA1/HSPA5/CUL1/USP13/RAD18/UBE2T/XRCC5/HSP90AA1/DNAJA1/AURKA/HSP90AB1/RANGAP1/PSMA3/TRIB3/HM13/AXIN1/GPI/PIAS4/CUL2/CASC3/YWHAE/HSPA8/TPI1/RNF8/HSPA9/AUP1/SUMO1/CACYBP/SCAMP3/MFN2/PRDX6/TCP1/RPL5/TUBA1B/TRIM28/UBE2G1/HSPBP1/SLF1/DERL1/LRPPRC/CUL4A/WRAP53/RPS27A/HSPD1/MFHAS1/RNF20/NDUFS2/NAE1/SMC6/CAMLG/YWHAZ/VCP/BAG5/CCT2/OTUB1/PA2G4/PSMD1/GLMN/UBE2N/CALR/NPLOC4/CHEK2/ACTG1/UBOX5/F…	74
MF	GO:0003899	DNA-directed 5'-3' RNA polymerase activity	21/2157	39/18410	1.92891e-10	5.24898e-09	4.04856e-09	POLR3B/POLR1A/POLR2E/POLR2F/POLR3H/RPAP1/POLR1F/POLR3G/POLR1G/POLR1B/POLR3F/POLR1E/POLR2D/POLR3A/POLR3K/POLR2H/POLR2G/POLR3D/POLR3C/PRIM1/CRCP	21
MF	GO:0000217	DNA secondary structure binding	20/2157	36/18410	2.46845e-10	6.51962e-09	5.02861e-09	HMGB3/RAD18/CLSPN/MSH2/YY1/RAD51C/NEIL3/RAD51AP1/MSH6/MEN1/HMGA1/HNRNPD/RECQL4/HMGB2/GEN1/RAD51D/FANCM/HMGB1/XRCC2/BLM	20
MF	GO:0003688	DNA replication origin binding	13/2157	16/18410	3.01658e-10	7.73969e-09	5.96966e-09	DDX11/MCM10/MCM2/ORC1/CDC45/CDC6/MCM5/POLA1/GRWD1/ORC3/DHX9/HSPD1/ORC5	13
MF	GO:0017056	structural constituent of nuclear pore	17/2157	28/18410	8.35867e-10	2.08502e-08	1.60819e-08	NUP160/NDC1/NUP133/NUP188/NUP93/NUP88/NUP98/NUP107/NUP155/NUP153/UPF3B/NUP85/NUP54/NUP205/NUP35/NUP62/POM121C	17
MF	GO:0000400	four-way junction DNA binding	13/2157	17/18410	1.14355e-09	2.77543e-08	2.1407e-08	HMGB3/MSH2/YY1/RAD51C/MSH6/MEN1/HMGB2/GEN1/RAD51D/FANCM/HMGB1/XRCC2/BLM	13
MF	GO:0031369	translation initiation factor binding	18/2157	32/18410	1.50046e-09	3.54582e-08	2.73491e-08	ANGEL1/EIF5/EIF3B/TBL2/ZPR1/EIF4G1/EIF2B4/GLE1/EIF2S2/POLR2D/EIF2B5/EIF3M/EIF4E/LARP1/POLR2G/EIF3F/EIF3C/EIF4EBP1	18
MF	GO:0034062	5'-3' RNA polymerase activity	21/2157	43/18410	2.03836e-09	4.51366e-08	3.4814e-08	POLR3B/POLR1A/POLR2E/POLR2F/POLR3H/RPAP1/POLR1F/POLR3G/POLR1G/POLR1B/POLR3F/POLR1E/POLR2D/POLR3A/POLR3K/POLR2H/POLR2G/POLR3D/POLR3C/PRIM1/CRCP	21
MF	GO:0097747	RNA polymerase activity	21/2157	43/18410	2.03836e-09	4.51366e-08	3.4814e-08	POLR3B/POLR1A/POLR2E/POLR2F/POLR3H/RPAP1/POLR1F/POLR3G/POLR1G/POLR1B/POLR3F/POLR1E/POLR2D/POLR3A/POLR3K/POLR2H/POLR2G/POLR3D/POLR3C/PRIM1/CRCP	21
MF	GO:0008757	S-adenosylmethionine-dependent methyltransferase activity	46/2157	157/18410	2.0608e-09	4.51366e-08	3.4814e-08	NSUN2/METTL1/FTSJ1/BUD23/DIMT1/METTL2A/PRMT5/PCIF1/SUV39H1/DOT1L/FBL/EZH2/FTSJ3/NSD2/RBBP5/DPH5/EEF2KMT/PCMT1/METTL8/PRMT1/EMG1/TRMT5/METTL16/NSUN5/DNMT1/COQ3/SMYD5/METTL5/CARM1/MEPCE/NTMT1/SUV39H2/WDR4/TFB2M/NSD1/TRMT61A/TRMT61B/TRMT10C/KMT5A/PRMT3/WDR5/PRMT6/EHMT2/METTL6/CSKMT/EEF1AKMT4	46
MF	GO:0051536	iron-sulfur cluster binding	27/2157	67/18410	2.26658e-09	4.73346e-08	3.65094e-08	CIAPIN1/DDX11/NDUFS1/POLD1/NTHL1/FECH/KIF4A/ACO2/CDK5RAP1/ERCC2/GLRX3/SDHB/PPAT/BRIP1/DNA2/CISD2/PRIM2/RPS3/NDUFS2/ABCE1/NDUFV1/UQCRFS1/NFU1/POLE/GLRX5/TYW1/NFS1	27
MF	GO:0051540	metal cluster binding	27/2157	67/18410	2.26658e-09	4.73346e-08	3.65094e-08	CIAPIN1/DDX11/NDUFS1/POLD1/NTHL1/FECH/KIF4A/ACO2/CDK5RAP1/ERCC2/GLRX3/SDHB/PPAT/BRIP1/DNA2/CISD2/PRIM2/RPS3/NDUFS2/ABCE1/NDUFV1/UQCRFS1/NFU1/POLE/GLRX5/TYW1/NFS1	27
MF	GO:0140142	nucleocytoplasmic carrier activity	17/2157	30/18410	3.69712e-09	7.54548e-08	5.81986e-08	TNPO3/IPO5/XPO1/TNPO1/IPO11/TNPO2/KPNB1/TMCO6/CSE1L/XPO5/XPO7/RAN/HIKESHI/XPO6/SNUPN/KPNA2/IPO9	17
MF	GO:0016741	transferase activity, transferring one-carbon groups	58/2157	225/18410	3.89351e-09	7.76972e-08	5.99282e-08	CIAPIN1/NSUN2/METTL1/FTSJ1/BUD23/CAD/DIMT1/METTL2A/PRMT5/PCIF1/SUV39H1/DOT1L/FBL/EZH2/FTSJ3/NSD2/RBBP5/DPH5/EEF2KMT/PCMT1/METTL8/PRMT1/EMG1/TRMT5/METTL16/NSUN5/DNMT1/COQ3/SMYD5/TGS1/ATIC/METTL5/CARM1/MEPCE/NTMT1/SUV39H2/GART/WDR4/HENMT1/TFB2M/NSD1/TRMT61A/TRMT61B/FAM98B/TRMT10C/TYMS/SHMT1/SUZ12/SHMT2/TRMT12/KMT5A/PRMT3/WDR5/PRMT6/EHMT2/METTL6/CSKMT/EEF1AKMT4	58
MF	GO:0140104	molecular carrier activity	28/2157	73/18410	4.3242e-09	8.4416e-08	6.51104e-08	NDUFAB1/TNPO3/IPO5/XPO1/TNPO1/IPO11/TIMM9/EMC9/TNPO2/KPNB1/HSPA8/TMCO6/PARK7/CSE1L/XPO5/EMC1/EMC4/XPO7/EMC8/RAN/TIMM10/HIKESHI/OXA1L/XPO6/SNUPN/MMGT1/KPNA2/IPO9	28
MF	GO:0034511	U3 snoRNA binding	10/2157	11/18410	4.70592e-09	8.99131e-08	6.93504e-08	XRCC5/SNU13/RRP9/UTP25/NHP2/DHX37/BMS1/TSR1/TBL3/PRKDC	10
MF	GO:0008408	3'-5' exonuclease activity	23/2157	54/18410	9.77833e-09	1.82936e-07	1.411e-07	ANGEL1/MRE11/POLD1/EXOSC5/EXD2/XRN2/APEX1/EXOSC3/RAD1/ERI3/EXOSC9/EXOSC2/TOE1/PNPT1/POLG/ISG20L2/TATDN1/REXO4/APEX2/EXOSC10/POLE/EXOSC4/CNOT7	23
MF	GO:0070034	telomerase RNA binding	14/2157	22/18410	1.1288e-08	2.0687e-07	1.59559e-07	HNRNPC/SNRPD3/GAR1/SMG7/TENT4B/SNRPB/DKC1/WRAP53/NAF1/NHP2/HNRNPU/EXOSC10/SMG5/PINX1	14
MF	GO:0003727	single-stranded RNA binding	30/2157	87/18410	2.22411e-08	3.99451e-07	3.08098e-07	PTBP1/DDX11/ZFR/U2AF2/JMJD6/DAZAP1/DDX1/HNRNPC/ZC3H14/EIF4H/FXR1/KHDRBS1/AGO2/SNRPC/ILF3/HNRNPA1/DHX9/PNPT1/SSB/EIF4A3/HNRNPU/LARP4/POLR2G/CNBP/EXOSC10/PUS1/MCRS1/LONP1/SRA1/LSM14A	30
MF	GO:0008173	RNA methyltransferase activity	25/2157	65/18410	2.71206e-08	4.77535e-07	3.68325e-07	NSUN2/METTL1/FTSJ1/BUD23/DIMT1/METTL2A/PCIF1/FBL/FTSJ3/METTL8/EMG1/TRMT5/METTL16/NSUN5/TGS1/METTL5/MEPCE/WDR4/HENMT1/TFB2M/TRMT61A/TRMT61B/TRMT10C/TRMT12/METTL6	25
MF	GO:0004536	deoxyribonuclease activity	23/2157	57/18410	3.36495e-08	5.81101e-07	4.48206e-07	MRE11/POLD1/XRCC1/EXD2/APEX1/RAD51C/RAD1/DCLRE1B/ZRANB3/MGME1/MBD4/APTX/DNA2/TATDN1/RPS3/FEN1/APEX2/DFFB/EXO1/POLE/GEN1/DCLRE1A/NME1	23
MF	GO:0051539	4 iron, 4 sulfur cluster binding	19/2157	41/18410	3.55303e-08	6.02003e-07	4.64328e-07	CIAPIN1/DDX11/NDUFS1/POLD1/NTHL1/ACO2/CDK5RAP1/ERCC2/SDHB/PPAT/BRIP1/DNA2/PRIM2/NDUFS2/ABCE1/NDUFV1/NFU1/POLE/TYW1	19
MF	GO:0004529	exodeoxyribonuclease activity	14/2157	24/18410	5.50561e-08	8.98916e-07	6.93338e-07	MRE11/POLD1/EXD2/APEX1/RAD1/DCLRE1B/MGME1/APTX/TATDN1/FEN1/APEX2/EXO1/POLE/DCLRE1A	14
MF	GO:0016895	exodeoxyribonuclease activity, producing 5'-phosphomonoesters	14/2157	24/18410	5.50561e-08	8.98916e-07	6.93338e-07	MRE11/POLD1/EXD2/APEX1/RAD1/DCLRE1B/MGME1/APTX/TATDN1/FEN1/APEX2/EXO1/POLE/DCLRE1A	14
MF	GO:0045296	cadherin binding	73/2157	333/18410	7.32242e-08	1.1742e-06	9.05668e-07	ANLN/MRE11/HSPA5/ZC3H15/ENO1/SNX5/GCN1/NUDC/HSP90AB1/RANBP1/RANGAP1/AHSA1/EIF5/NOP56/MAPRE1/CHMP4B/EMD/UBFD1/EIF3E/EEF1D/YKT6/EIF4H/LRRC59/YWHAE/HSPA8/RARS1/TXNDC9/PARK7/PRDX1/PRDX6/PCMT1/TMPO/VAPB/PAICS/EIF2S3/ARFIP2/RAN/LDHA/BZW2/UBAP2/ATIC/OLA1/DIAPH3/CDH24/UNC45A/PSMB6/SERBP1/EIF2A/LARP1/CCT8/CCNB2/ABCF3/CIP2A/YWHAZ/HNRNPK/YWHAB/EEF2/GLOD4/SLC3A2/FASN/RSL1D1/PPP1CA/HCFC1/KLC2/CKAP5/RUVBL1/CDK…	73
MF	GO:0008168	methyltransferase activity	53/2157	214/18410	7.59931e-08	1.19722e-06	9.23425e-07	CIAPIN1/NSUN2/METTL1/FTSJ1/BUD23/DIMT1/METTL2A/PRMT5/PCIF1/SUV39H1/DOT1L/FBL/EZH2/FTSJ3/NSD2/RBBP5/DPH5/EEF2KMT/PCMT1/METTL8/PRMT1/EMG1/TRMT5/METTL16/NSUN5/DNMT1/COQ3/SMYD5/TGS1/METTL5/CARM1/MEPCE/NTMT1/SUV39H2/WDR4/HENMT1/TFB2M/NSD1/TRMT61A/TRMT61B/FAM98B/TRMT10C/TYMS/SUZ12/TRMT12/KMT5A/PRMT3/WDR5/PRMT6/EHMT2/METTL6/CSKMT/EEF1AKMT4	53
MF	GO:0044183	protein folding chaperone	19/2157	43/18410	9.21416e-08	1.42661e-06	1.10035e-06	HSPA5/HSP90AA1/HSP90AB1/CCDC47/HSPA8/HSPA9/PFDN1/CCT4/PDCL3/TCP1/CCT7/CCT6A/CCT5/CCT8/DFFA/CCT3/CCT2/CALR/HSPA14	19
MF	GO:0002161	aminoacyl-tRNA editing activity	10/2157	13/18410	9.78057e-08	1.48864e-06	1.14819e-06	LARS2/IARS2/AARS1/AARS2/DTD1/DTD2/LARS1/TARS2/IARS1/VARS1	10
MF	GO:0070182	DNA polymerase binding	13/2157	22/18410	1.35096e-07	2.02193e-06	1.55953e-06	RAD51/HSP90AA1/HSP90AB1/PTGES3/SMARCA4/PCNA/NAT10/NABP2/FANCI/FANCD2/CDT1/HMGB1/LONP1	13
MF	GO:0017069	snRNA binding	21/2157	53/18410	1.9177e-07	2.8231e-06	2.17747e-06	SART3/SNRPA/GEMIN5/RBM22/SNRPD3/SNU13/PRPF31/EFTUD2/SNRPB2/METTL16/LSM4/SNRPA1/EIF5A/TOE1/PRPF4/MEPCE/HNRNPU/DDX21/PRPF8/SF3B3/LSM2	21
MF	GO:0070628	proteasome binding	11/2157	17/18410	3.51176e-07	5.08639e-06	3.92315e-06	USP13/PSME4/USP14/ZFAND1/PSMD14/UCHL5/PSMF1/ADRM1/RAD23A/PSMG1/BAG6	11
MF	GO:0003712	transcription coregulator activity	96/2157	497/18410	4.54428e-07	6.39818e-06	4.93495e-06	KDM1A/CCDC124/MED24/DPF1/BRCA1/THRAP3/TAF11/SMARCD1/TRIP13/ENO1/DDX1/ATXN7L3/KDM2B/FUS/RCOR1/SMARCB1/HIRA/PRMT5/SNW1/APEX1/PRPF6/TRIB3/PQBP1/MED26/PIAS4/BUD31/TAF6/EZH2/C1QBP/SMARCD2/NUP98/GMNN/SUB1/CEBPZ/PARK7/HDAC1/ENY2/COPS5/DDX54/NCOA5/MED1/RALY/ELK1/SMARCA4/TRIM28/PSMC3IP/MYBBP1A/DPF2/MED6/TAF5L/DHX9/ACTL6A/HMGA1/TDG/CARM1/HDGF/CNOT9/MTDH/MED22/PPRC1/MTA2/CENPJ/HNRNPU/MMS19/RNF20/MED19/RRP1B…	96
MF	GO:0004519	endonuclease activity	35/2157	124/18410	4.55995e-07	6.39818e-06	4.93495e-06	LAS1L/ELAC2/MRE11/NTHL1/XRCC1/APEX1/POP1/POP4/RAD51C/PPP1R8/CPSF3/RCL1/ZRANB3/PMS2/AGO2/RPP40/MBD4/DBR1/DNA2/NOB1/G3BP1/REXO4/RPP30/RPS3/EME1/FEN1/APEX2/DFFB/TSEN34/POP7/EXO1/GEN1/EDC3/SND1/TSN	35
MF	GO:0140296	general transcription initiation factor binding	20/2157	52/18410	6.59893e-07	9.11667e-06	7.03173e-06	NOP58/TAF11/PSMC1/BRF2/FBL/CAND1/TBP/TAF1B/GTF2F1/POLR1E/GTF2A2/RPTOR/HNRNPU/YEATS2/NOLC1/RUVBL1/TAF7/RUVBL2/HSF1/MTOR	20
MF	GO:0003713	transcription coactivator activity	59/2157	266/18410	8.47383e-07	1.15295e-05	8.89279e-06	KDM1A/CCDC124/MED24/BRCA1/THRAP3/TAF11/SMARCD1/ATXN7L3/FUS/SMARCB1/SNW1/APEX1/PRPF6/PQBP1/MED26/BUD31/TAF6/SMARCD2/NUP98/SUB1/CEBPZ/PARK7/ENY2/COPS5/MED1/ELK1/SMARCA4/TRIM28/PSMC3IP/MED6/TAF5L/DHX9/ACTL6A/HMGA1/CARM1/CNOT9/MTDH/PPRC1/MTA2/CENPJ/MMS19/RNF20/RRP1B/TAF6L/HMGB2/MED30/BRD7/ASXL1/HCFC1/RUVBL1/MED14/NPM1/UBE2L3/HMGB1/NCOA6/DAXX/SRA1/RBM14/TAF9	59
MF	GO:0015631	tubulin binding	76/2157	376/18410	1.2109e-06	1.62296e-05	1.2518e-05	PAFAH1B1/ZNF207/BRCA1/KIF1B/KIF2A/NDE1/GTSE1/SPAG5/KIF22/AGBL5/TPX2/BIRC5/KIF4A/TTLL12/ADNP/RAE1/KIF3B/MAPRE1/FAM83D/EMD/PDCD5/FSD1/SMC3/GIT1/GAPDH/KIF20A/CACYBP/CENPF/KIF14/KIF18A/VAPB/DLGAP5/KNSTRN/HAUS8/DIAPH1/PSRC1/TTLL4/KIF23/TUBGCP4/LRPPRC/KIF11/KIF20B/CENPE/NEDD1/RITA1/BRCA2/DIAPH3/KATNB1/KIF2C/TERF1/HAUS6/RPS3/CCT5/CENPJ/CETN3/CCSAP/SKA1/VBP1/CFAP157/RACGAP1/SPC24/KIF15/PLK1/TBCA/CKAP5/CD…	76
MF	GO:0043139	5'-3' DNA helicase activity	8/2157	10/18410	1.26904e-06	1.67588e-05	1.29261e-05	DDX11/ERCC2/TWNK/BRIP1/DNA2/PIF1/RUVBL1/RUVBL2	8
MF	GO:0061608	nuclear import signal receptor activity	11/2157	19/18410	1.71279e-06	2.22911e-05	1.71932e-05	TNPO3/IPO5/TNPO1/IPO11/TNPO2/KPNB1/TMCO6/HIKESHI/SNUPN/KPNA2/IPO9	11
MF	GO:0009982	pseudouridine synthase activity	9/2157	13/18410	1.88189e-06	2.41419e-05	1.86208e-05	RPUSD1/PUS7/PUS3/DKC1/RPUSD3/RPUSD4/RPUSD2/TRUB2/PUS1	9
MF	GO:0047485	protein N-terminus binding	30/2157	105/18410	2.23747e-06	2.82992e-05	2.18273e-05	MNAT1/TAF11/CSNK2A1/SUV39H1/EIF3E/ERCC2/GTF2H3/PDCD10/HDAC1/ZWINT/SMARCA4/VPS25/EIF5A/MEN1/YWHAQ/APTX/PEX5/TARBP2/PELP1/HAX1/PARP1/CALM2/LRP8/ERCC3/MAP2K1/RPS21/BANF1/PPP1CC/DAXX/PHB2	30
MF	GO:0003725	double-stranded RNA binding	24/2157	75/18410	2.57397e-06	3.21031e-05	2.47613e-05	DHX33/ZFR/ELAVL1/DDX1/HSP90AB1/EIF4H/DHX15/TUBA1B/AGO2/STAU1/ILF3/DHX9/MRPL44/APTX/TARBP2/ILF2/HSPD1/MTDH/HNRNPU/SUPV3L1/DDX21/SLC3A2/YRDC/LSM14A	24
MF	GO:0004540	ribonuclease activity	32/2157	117/18410	2.94951e-06	3.6283e-05	2.79853e-05	ELAC2/ANGEL1/EXOSC5/EXD2/XRN2/APEX1/POP1/POP4/EXOSC3/ERI3/PPP1R8/CPSF3/RCL1/EXOSC9/AGO2/RPP40/EXOSC2/TOE1/PNPT1/DBR1/NOB1/ISG20L2/RPP30/FEN1/TSEN34/EXOSC10/POP7/EXO1/EXOSC4/EDC3/SND1/CNOT7	32
MF	GO:0031072	heat shock protein binding	33/2157	123/18410	3.29414e-06	3.99749e-05	3.08328e-05	FKBP4/PPP5C/HSPA5/DNAJA1/HSP90AB1/ST13/AHSA1/CSNK2A1/DNAJA3/DNAJC2/OGDH/TFAM/KPNB1/HSPA8/PTGES3/HSPA9/DNAJC8/UNC45A/HIKESHI/RPS3/DNAJC7/STIP1/CDK1/PPID/IRAK1/FAF1/HSF1/HSPA14/HDAC2/DAXX/BAG6/NUP62/DNAJC9	33
MF	GO:0043024	ribosomal small subunit binding	10/2157	17/18410	4.25573e-06	5.09552e-05	3.9302e-05	UNG/MTIF2/EIF4H/PTCD3/ERAL1/LARP1/ABCE1/EIF1/NPM1/NME1	10
MF	GO:0140030	modification-dependent protein binding	40/2157	166/18410	5.94184e-06	7.02076e-05	5.41514e-05	SPRTN/PSME4/UFD1/RAD18/TTLL12/L3MBTL2/CHD8/DNAJC2/CBX1/MSH6/RBBP5/ZRANB3/CBX3/YEATS4/SMARCA4/MORC4/DPF2/UBQLN1/PWP1/CARM1/NCAPG2/NCAPD3/PSMD4/UBQLN4/LRWD1/YEATS2/ATRIP/VCP/BRD7/ING2/PRPF8/SUZ12/TAF7/RAD23A/NPLOC4/BRCC3/WDR5/DAXX/BAG6/UHRF1	40
MF	GO:0042162	telomeric DNA binding	15/2157	37/18410	7.69231e-06	8.97103e-05	6.9194e-05	UPF1/XRCC5/APEX1/NCL/SMG7/HNRNPA2B1/RPA1/HNRNPA1/HNRNPD/NABP2/PIF1/TERF1/XRCC6/BLM/SMG5	15
MF	GO:0016251	RNA polymerase II general transcription initiation factor activity	15/2157	38/18410	1.1337e-05	0.000128868	9.93967e-05	TAF2/TAF11/TAF6/GTF2H3/TBP/GTF2F1/TAF4/GTF2A2/TAF4B/TAF5/GTF2E1/TAF6L/TAF7/GTF2E2/TAF9	15
MF	GO:0016896	exoribonuclease activity, producing 5'-phosphomonoesters	15/2157	38/18410	1.1337e-05	0.000128868	9.93967e-05	ANGEL1/EXOSC5/EXD2/XRN2/EXOSC3/ERI3/CPSF3/EXOSC9/EXOSC2/TOE1/PNPT1/ISG20L2/EXOSC10/EXOSC4/CNOT7	15
MF	GO:0002039	p53 binding	21/2157	66/18410	1.18488e-05	0.000133003	0.000102586	KDM1A/MAPKAPK5/SMARCB1/PRMT5/CHD8/AXIN1/USP10/HDAC1/SMARCA4/PSME3/HSPD1/RNF20/BRD7/RFWD3/TRIAP1/TP53RK/KMT5A/BLM/DAXX/EHMT2/TAF9	21
MF	GO:0031491	nucleosome binding	21/2157	67/18410	1.53684e-05	0.000170381	0.000131416	ACTR6/HNRNPC/SUPT16H/SMARCB1/HIRA/DNTTIP1/SMARCD2/SUPT6H/MACROH2A1/HDAC1/SMARCA4/PARP2/ACTL6A/SSRP1/MTA2/H2AZ1/RCC1/NOC2L/HDAC2/HMGN2/HMGN1	21
MF	GO:0008017	microtubule binding	56/2157	272/18410	1.69164e-05	0.000185255	0.000142888	PAFAH1B1/ZNF207/KIF1B/KIF2A/NDE1/GTSE1/SPAG5/KIF22/TPX2/BIRC5/KIF4A/RAE1/KIF3B/MAPRE1/FAM83D/FSD1/GAPDH/KIF20A/CENPF/KIF14/KIF18A/VAPB/DLGAP5/KNSTRN/HAUS8/DIAPH1/PSRC1/KIF23/TUBGCP4/LRPPRC/KIF11/KIF20B/CENPE/DIAPH3/KATNB1/KIF2C/TERF1/HAUS6/RPS3/CETN3/CCSAP/SKA1/CFAP157/RACGAP1/SPC24/KIF15/PLK1/CKAP5/RCC2/DRG1/KIF18B/KATNA1/KIF24/OPA1/DCTN1/KIFC1	56
MF	GO:0000175	3'-5'-exoribonuclease activity	14/2157	35/18410	1.85652e-05	0.000200863	0.000154926	ANGEL1/EXOSC5/EXD2/XRN2/EXOSC3/ERI3/EXOSC9/EXOSC2/TOE1/PNPT1/ISG20L2/EXOSC10/EXOSC4/CNOT7	14
MF	GO:0016866	intramolecular transferase activity	12/2157	27/18410	2.07077e-05	0.000218771	0.000168739	RPUSD1/PUS7/PMM1/PUS3/DKC1/RPUSD3/LSS/RPUSD4/RPUSD2/TRUB2/PGAM1/PUS1	12
MF	GO:0048027	mRNA 5'-UTR binding	12/2157	27/18410	2.07077e-05	0.000218771	0.000168739	NCL/RPL5/SYNCRIP/UTP23/CCT5/LARP1/RSL1D1/RPS7/SHMT1/MRPS11/SHMT2/RPL41	12
MF	GO:0004532	exoribonuclease activity	15/2157	40/18410	2.34603e-05	0.000244969	0.000188946	ANGEL1/EXOSC5/EXD2/XRN2/EXOSC3/ERI3/CPSF3/EXOSC9/EXOSC2/TOE1/PNPT1/ISG20L2/EXOSC10/EXOSC4/CNOT7	15
MF	GO:0140223	general transcription initiation factor activity	16/2157	45/18410	2.7415e-05	0.000282974	0.000218259	TAF2/TAF11/TAF6/UBTF/GTF2H3/TBP/GTF2F1/TAF4/GTF2A2/TAF4B/TAF5/GTF2E1/TAF6L/TAF7/GTF2E2/TAF9	16
MF	GO:0140297	DNA-binding transcription factor binding	85/2157	470/18410	2.79819e-05	0.000285543	0.000220241	FKBP4/KDM1A/DHX33/MED24/THRAP3/DDX20/TAF11/TCF3/KEAP1/DNAJA1/TXLNG/SMARCB1/HIRA/SNW1/YY1/APEX1/PRPF6/E2F1/CHCHD2/BUD31/TAF6/MLX/GMNN/TBP/NCL/PARK7/HDAC1/MAD2L2/CENPF/DDX54/EXOSC9/MED1/MKKS/ELK1/SMARCA4/TAF4/PCNA/DHX9/MYC/HMGA1/BBS7/TDG/GTF2A2/TAF4B/PARP1/LYAR/PURB/NCAPG2/MTDH/PDCD11/RPS3/MTA2/EIF4E/MMS19/HMGB2/MED30/YWHAZ/DCAF13/NSD1/ASXL1/PPID/HDAC3/HCFC1/BRMS1/TAF7/CALR/MED14/NPM1/FAF1/HSF1/PTM…	85
MF	GO:0030374	nuclear receptor coactivator activity	18/2157	56/18410	4.21349e-05	0.000425136	0.00032791	KDM1A/MED24/THRAP3/ATXN7L3/BUD31/ENY2/MED1/ELK1/PSMC3IP/HMGA1/CARM1/CNOT9/PPRC1/MED30/MED14/NCOA6/SRA1/RBM14	18
MF	GO:0001046	core promoter sequence-specific DNA binding	15/2157	42/18410	4.58167e-05	0.000457149	0.000352601	SMARCB1/PIH1D1/EZH2/UBTF/TBP/MACROH2A1/TAF1B/HDAC1/AGO2/SMARCA4/TAF4/MYC/H2AZ1/NPM1/RUVBL2	15
MF	GO:0032977	membrane insertase activity	8/2157	14/18410	5.47571e-05	0.00053582	0.00041328	TIMM9/EMC9/EMC1/EMC4/EMC8/TIMM10/OXA1L/MMGT1	8
MF	GO:0042054	histone methyltransferase activity	18/2157	57/18410	5.48947e-05	0.00053582	0.00041328	PRMT5/SUV39H1/DOT1L/FBL/EZH2/NSD2/RBBP5/PRMT1/SMYD5/CARM1/NTMT1/SUV39H2/NSD1/SUZ12/KMT5A/WDR5/PRMT6/EHMT2	18
MF	GO:0140597	protein carrier chaperone	9/2157	18/18410	7.37731e-05	0.000712347	0.000549436	TIMM9/EMC9/HSPA8/EMC1/EMC4/EMC8/TIMM10/OXA1L/MMGT1	9
MF	GO:0008276	protein methyltransferase activity	24/2157	90/18410	7.65169e-05	0.000730981	0.000563809	PRMT5/SUV39H1/DOT1L/FBL/EZH2/NSD2/RBBP5/EEF2KMT/PCMT1/PRMT1/SMYD5/CARM1/NTMT1/SUV39H2/NSD1/FAM98B/SUZ12/KMT5A/PRMT3/WDR5/PRMT6/EHMT2/CSKMT/EEF1AKMT4	24
MF	GO:0008649	rRNA methyltransferase activity	10/2157	22/18410	8.12095e-05	0.000767643	0.000592087	BUD23/DIMT1/FBL/FTSJ3/EMG1/METTL16/NSUN5/METTL5/TFB2M/TRMT61B	10
MF	GO:0042809	nuclear vitamin D receptor binding	8/2157	15/18410	0.000105264	0.000984655	0.000759469	MED24/THRAP3/TAF11/SNW1/MED1/MED30/TAF7/MED14	8
MF	GO:0034061	DNA polymerase activity	13/2157	36/18410	0.000128442	0.00117864	0.000909091	POLQ/POLD1/POLD3/POLE2/POLA1/CHRAC1/PTGES3/TENT4B/DKC1/POLG/TERF1/POLE3/POLE	13
MF	GO:0140102	catalytic activity, acting on a rRNA	10/2157	23/18410	0.000128627	0.00117864	0.000909091	BUD23/DIMT1/FBL/FTSJ3/EMG1/METTL16/NSUN5/METTL5/TFB2M/TRMT61B	10
MF	GO:0008174	mRNA methyltransferase activity	7/2157	12/18410	0.000139087	0.00126162	0.000973093	NSUN2/PCIF1/METTL8/METTL16/TRMT61A/TRMT61B/TRMT10C	7
MF	GO:0003777	microtubule motor activity	19/2157	67/18410	0.000173598	0.00155891	0.00120239	KIF1B/KIF2A/KIF22/KIF4A/KIF3B/SMC3/KIF20A/KIF14/KIF18A/KIF23/KIF11/KIF20B/CENPE/KIF2C/KIF15/KIF18B/KIF24/DYNC1H1/KIFC1	19
MF	GO:0051087	chaperone binding	26/2157	106/18410	0.000176476	0.00156906	0.00121022	HSPA5/USP13/DNAJA1/BIRC5/SLC25A17/TIMM9/AHSA1/PFDN4/UBL4A/TIMM44/OGDH/GRPEL1/HSPA8/PTGES3/TIMM10/WRAP53/SOD1/HSPD1/HYOU1/ATP1A1/CDC25A/GRPEL2/BAG5/TBCA/CALR/DNAJC9	26
MF	GO:1990841	promoter-specific chromatin binding	18/2157	62/18410	0.000184273	0.00162233	0.00125131	KDM1A/RBL1/EZH2/NUP98/MACROH2A1/PCGF1/HDAC1/GTF2F1/MED1/TRIM28/DNMT1/DHX9/HNRNPU/ERCC3/SUZ12/HSF1/HDAC2/EHMT2	18
MF	GO:0017070	U6 snRNA binding	8/2157	16/18410	0.0001889	0.00164692	0.00127028	SART3/RBM22/METTL16/LSM4/EIF5A/PRPF4/PRPF8/LSM2	8
MF	GO:0001091	RNA polymerase II general transcription initiation factor binding	10/2157	24/18410	0.00019743	0.00170473	0.00131487	NOP58/FBL/TBP/GTF2F1/GTF2A2/HNRNPU/NOLC1/RUVBL1/TAF7/RUVBL2	10
MF	GO:0008175	tRNA methyltransferase activity	12/2157	33/18410	0.000215525	0.00184325	0.00142171	NSUN2/METTL1/FTSJ1/METTL2A/METTL8/TRMT5/WDR4/TRMT61A/TRMT61B/TRMT10C/TRMT12/METTL6	12
MF	GO:0008170	N-methyltransferase activity	24/2157	97/18410	0.000267733	0.00223125	0.00172098	DIMT1/PRMT5/SUV39H1/DOT1L/FBL/EZH2/NSD2/RBBP5/EEF2KMT/PRMT1/METTL16/SMYD5/METTL5/CARM1/SUV39H2/TFB2M/NSD1/KMT5A/PRMT3/WDR5/PRMT6/EHMT2/CSKMT/EEF1AKMT4	24
MF	GO:0008296	3'-5'-exodeoxyribonuclease activity	7/2157	13/18410	0.000270832	0.00223125	0.00172098	MRE11/POLD1/EXD2/APEX1/TATDN1/APEX2/POLE	7
MF	GO:0019104	DNA N-glycosylase activity	7/2157	13/18410	0.000270832	0.00223125	0.00172098	NTHL1/UNG/APEX1/NEIL3/MBD4/PCNA/TDG	7
MF	GO:0140666	annealing activity	7/2157	13/18410	0.000270832	0.00223125	0.00172098	RAD54L/EIF4H/FXR1/ZRANB3/SMARCAL1/RECQL4/BLM	7
MF	GO:0003887	DNA-directed DNA polymerase activity	10/2157	25/18410	0.000294661	0.0024055	0.00185538	POLQ/POLD1/POLD3/POLE2/POLA1/CHRAC1/TENT4B/POLG/POLE3/POLE	10
MF	GO:0016891	endoribonuclease activity, producing 5'-phosphomonoesters	12/2157	34/18410	0.00029783	0.00240947	0.00185844	ELAC2/APEX1/POP1/POP4/AGO2/RPP40/DBR1/RPP30/FEN1/POP7/EXO1/EDC3	12
MF	GO:0008574	plus-end-directed microtubule motor activity	8/2157	17/18410	0.000320216	0.0025515	0.00196799	KIF1B/KIF3B/KIF14/KIF18A/KIF11/KIF20B/CENPE/KIF18B	8
MF	GO:0055106	ubiquitin-protein transferase regulator activity	9/2157	21/18410	0.000321069	0.0025515	0.00196799	TRIB3/FZR1/FBXO5/AUP1/CDC20/RPL5/RPS7/GLMN/UBE2L3	9
MF	GO:0016893	endonuclease activity, active with either ribo- or deoxyribonucleic acids and producing 5'-phosphomonoesters	14/2157	44/18410	0.000331859	0.00261412	0.00201628	ELAC2/APEX1/POP1/POP4/AGO2/RPP40/DBR1/DNA2/RPP30/FEN1/POP7/EXO1/GEN1/EDC3	14
MF	GO:0016884	carbon-nitrogen ligase activity, with glutamine as amido-N-donor	6/2157	10/18410	0.000354503	0.00274434	0.00211672	CAD/QRSL1/ASNSD1/GMPS/PFAS/GATC	6
MF	GO:0032356	oxidized DNA binding	6/2157	10/18410	0.000354503	0.00274434	0.00211672	XRCC1/MSH2/MSH6/RPS3/RECQL4/BLM	6
MF	GO:0008022	protein C-terminus binding	37/2157	179/18410	0.000393556	0.00302063	0.00232983	VTA1/MRE11/RAD51/XRCC5/MSH2/IFT52/MAPRE1/AXIN1/ERCC2/PIAS4/PPP2CA/NCL/SNX17/PCGF1/CDC20/CENPF/GPSM2/AGO2/CEP250/YEATS4/TOP2A/PCNA/CDK7/MDC1/BRCA2/SAE1/MKI67/XRCC4/PFKM/ERCC3/TOPBP1/MAD2L1/MAP2K1/BANF1/PPP1CC/XRCC6/PHB2	37
MF	GO:0005048	signal sequence binding	15/2157	50/18410	0.000421234	0.00320566	0.00247254	IPO5/TNPO1/SRP54/TNPO2/KPNB1/NUP98/NUP153/PEX5/TOMM70/NOLC1/SRP68/TOMM20/TIMM22/KPNA2/POM121C	15
MF	GO:0031492	nucleosomal DNA binding	13/2157	40/18410	0.000426512	0.00321856	0.00248249	HNRNPC/SMARCB1/SMARCD2/MACROH2A1/HDAC1/SMARCA4/ACTL6A/MTA2/H2AZ1/RCC1/HDAC2/HMGN2/HMGN1	13
MF	GO:0004298	threonine-type endopeptidase activity	7/2157	14/18410	0.000486906	0.00361357	0.00278716	PSMB1/PSMA4/PSMB5/PSMB2/PSMB7/PSMB6/PSMB4	7
MF	GO:0043138	3'-5' DNA helicase activity	7/2157	14/18410	0.000486906	0.00361357	0.00278716	MCM2/MCM6/MCM5/DHX9/ERCC3/FANCM/BLM	7
MF	GO:0051059	NF-kappaB binding	11/2157	31/18410	0.000502526	0.00369892	0.002853	APEX1/HDAC1/TAF4B/MTDH/PDCD11/HDAC3/BRMS1/NPM1/FAF1/HDAC2/CPNE1	11
MF	GO:0008409	5'-3' exonuclease activity	8/2157	18/18410	0.000517371	0.00377723	0.00291339	MRE11/XRN2/DCLRE1B/CPSF3/APTX/FEN1/EXO1/DCLRE1A	8
MF	GO:0001098	basal transcription machinery binding	19/2157	74/18410	0.000689772	0.00492853	0.0038014	PAF1/NOP58/RTRAF/PCIF1/RPRD1B/FBL/TBP/AGO2/GTF2F1/DHX9/GTF2A2/HNRNPU/WDR43/NOLC1/LEO1/RUVBL1/TAF7/RUVBL2/CTR9	19
MF	GO:0001099	basal RNA polymerase II transcription machinery binding	19/2157	74/18410	0.000689772	0.00492853	0.0038014	PAF1/NOP58/RTRAF/PCIF1/RPRD1B/FBL/TBP/AGO2/GTF2F1/DHX9/GTF2A2/HNRNPU/WDR43/NOLC1/LEO1/RUVBL1/TAF7/RUVBL2/CTR9	19
MF	GO:0005049	nuclear export signal receptor activity	6/2157	11/18410	0.000702507	0.00492853	0.0038014	XPO1/CSE1L/XPO5/XPO7/RAN/XPO6	6
MF	GO:0047429	nucleoside-triphosphate diphosphatase activity	6/2157	11/18410	0.000702507	0.00492853	0.0038014	NUDT1/ITPA/DUT/DHX9/NUDT15/DCTPP1	6
MF	GO:0070122	isopeptidase activity	6/2157	11/18410	0.000702507	0.00492853	0.0038014	PSMD14/COPS5/STAMBP/EIF3H/EIF3F/BRCC3	6
MF	GO:0004520	endodeoxyribonuclease activity	12/2157	37/18410	0.000719789	0.00501063	0.00386472	MRE11/XRCC1/APEX1/RAD51C/ZRANB3/MBD4/DNA2/RPS3/FEN1/DFFB/EXO1/GEN1	12
MF	GO:0036002	pre-mRNA binding	16/2157	58/18410	0.00077078	0.00532431	0.00410667	PTBP1/U2AF2/RBM22/HNRNPL/TARDBP/HNRNPA2B1/SNRPC/HNRNPA1/TRA2B/TARBP2/CELF1/HNRNPU/SRSF2/SLBP/SF1/PRPF8	16
MF	GO:0003746	translation elongation factor activity	8/2157	19/18410	0.000802292	0.00549968	0.00424193	EEF1D/HBS1L/EEF1B2/EEFSEC/EIF5A/EEF2/GFM1/TUFM	8
MF	GO:0061629	RNA polymerase II-specific DNA-binding transcription factor binding	61/2157	348/18410	0.000818964	0.00554223	0.00427475	FKBP4/KDM1A/MED24/THRAP3/TAF11/TCF3/KEAP1/DNAJA1/SMARCB1/HIRA/SNW1/APEX1/PRPF6/BUD31/TAF6/MLX/TBP/PARK7/HDAC1/MAD2L2/DDX54/EXOSC9/MED1/MKKS/ELK1/SMARCA4/TAF4/PCNA/DHX9/HMGA1/BBS7/GTF2A2/TAF4B/PARP1/MTDH/PDCD11/MTA2/MMS19/MED30/DCAF13/NSD1/ASXL1/PPID/HDAC3/BRMS1/TAF7/CALR/MED14/NPM1/FAF1/HSF1/HMGB1/NIF3L1/HDAC2/DDRGK1/NCOA6/DAXX/CPNE1/PHB2/PRKDC/ZNHIT3	61
MF	GO:0004549	tRNA-specific ribonuclease activity	7/2157	15/18410	0.000820843	0.00554223	0.00427475	ELAC2/POP1/POP4/RPP40/RPP30/TSEN34/POP7	7
MF	GO:0016879	ligase activity, forming carbon-nitrogen bonds	14/2157	48/18410	0.00088713	0.0059451	0.00458548	CAD/MTHFD1/GSS/TTL/MTHFD1L/PAICS/QRSL1/TTLL4/ASNSD1/GART/GMPS/CTPS1/PFAS/GATC	14
MF	GO:0031490	chromatin DNA binding	24/2157	105/18410	0.000919663	0.00611746	0.00471843	HNRNPC/TOX4/SMARCB1/APEX1/EZH2/SMARCD2/MACROH2A1/HDAC1/SMARCA4/DHX9/ACTL6A/SBNO1/POLE3/MTA2/HNRNPU/H2AZ1/SUZ12/RCC1/RUVBL2/HSF1/KDM4D/HDAC2/HMGN2/HMGN1	24
MF	GO:0016853	isomerase activity	32/2157	155/18410	0.000958857	0.00633127	0.00488334	FKBP4/RPUSD1/PUS7/PMM1/FKBP3/GPI/PUS3/PTGES3/TPI1/DKC1/TOP2A/PPIL1/PDIA6/HSPD1/ENOPH1/EBP/RPUSD3/LSS/NAXE/RPUSD4/QSOX2/RPUSD2/TRUB2/PGAM1/PPID/PPIH/PUS1/TOP3A/TOP1MT/KATNA1/PPIA/TOP1	32
MF	GO:0043531	ADP binding	11/2157	34/18410	0.00121806	0.00798406	0.00615814	PPP5C/MSH2/MIEF1/PGK1/MSH6/ATP5F1A/VCP/RUVBL1/PRKAG1/RUVBL2/LONP1	11
MF	GO:0003906	DNA-(apurinic or apyrimidinic site) endonuclease activity	6/2157	12/18410	0.00126593	0.0082377	0.00635378	NTHL1/ALKBH1/APEX1/NEIL3/RPS3/APEX2	6
MF	GO:0035173	histone kinase activity	7/2157	16/18410	0.00131235	0.00847838	0.00653941	BAZ1B/AURKA/VRK1/CHEK1/CDK1/HASPIN/AURKB	7
MF	GO:0017025	TBP-class protein binding	9/2157	25/18410	0.00144313	0.00925668	0.00713972	TAF11/PSMC1/BRF2/CAND1/TAF1B/GTF2A2/YEATS2/RUVBL1/RUVBL2	9
MF	GO:1990381	ubiquitin-specific protease binding	8/2157	21/18410	0.00174201	0.0110945	0.00855726	SART3/SUMO1/PARK7/DERL1/SPATA2/VCP/RAD23A/BAG6	8
MF	GO:0035925	mRNA 3'-UTR AU-rich region binding	9/2157	26/18410	0.00198011	0.0125221	0.00965837	ELAVL1/CPSF1/KHSRP/EXOSC9/ILF3/HNRNPD/NUDT21/HNRNPA0/EXOSC4	9
MF	GO:0140318	protein transporter activity	10/2157	31/18410	0.00206798	0.0129864	0.0100164	TOMM22/TOMM40/SEC61G/TIMM17A/TIMM29/TIMM8B/TOMM70/TOMM20/TIMM22/TIMM23	10
MF	GO:0008320	protein transmembrane transporter activity	8/2157	22/18410	0.00245909	0.0153352	0.0118281	TOMM22/TOMM40/SEC61G/TIMM17A/TOMM70/TOMM20/TIMM22/TIMM23	8
MF	GO:0031593	polyubiquitin modification-dependent protein binding	14/2157	53/18410	0.00252258	0.0156226	0.0120498	SPRTN/UFD1/RAD18/ZRANB3/UBQLN1/PSMD4/UBQLN4/ATRIP/VCP/PRPF8/RAD23A/NPLOC4/BRCC3/BAG6	14
MF	GO:0008139	nuclear localization sequence binding	9/2157	27/18410	0.00266512	0.0162808	0.0125575	IPO5/TNPO1/TNPO2/KPNB1/NUP98/NUP153/NOLC1/KPNA2/POM121C	9
MF	GO:0022884	macromolecule transmembrane transporter activity	9/2157	27/18410	0.00266512	0.0162808	0.0125575	TOMM22/TOMM40/SEC61G/TIMM17A/TOMM70/HNRNPA3/TOMM20/TIMM22/TIMM23	9
MF	GO:0016922	nuclear receptor binding	28/2157	139/18410	0.00280525	0.0170211	0.0131284	FKBP4/KDM1A/MED24/THRAP3/TAF11/SNW1/PRPF6/BUD31/PARK7/DDX54/MED1/SMARCA4/PCNA/HMGA1/PARP1/MMS19/MED30/DCAF13/NSD1/ASXL1/PPID/TAF7/CALR/MED14/NCOA6/DAXX/PHB2/ZNHIT3	28
MF	GO:0004521	endoribonuclease activity	17/2157	71/18410	0.00290706	0.0175204	0.0135136	ELAC2/APEX1/POP1/POP4/CPSF3/RCL1/AGO2/RPP40/DBR1/NOB1/RPP30/FEN1/TSEN34/POP7/EXO1/EDC3/SND1	17
MF	GO:0008641	ubiquitin-like modifier activating enzyme activity	5/2157	10/18410	0.00333001	0.0192427	0.014842	MOCS3/UBA2/UBA1/SAE1/NAE1	5
MF	GO:0016812	hydrolase activity, acting on carbon-nitrogen (but not peptide) bonds, in cyclic amides	5/2157	10/18410	0.00333001	0.0192427	0.014842	CAD/DHODH/DCLRE1B/OPLAH/DCLRE1A	5
MF	GO:0033204	ribonuclease P RNA binding	5/2157	10/18410	0.00333001	0.0192427	0.014842	POP1/POP4/RPP40/RPP30/POP7	5
MF	GO:0051880	G-quadruplex DNA binding	5/2157	10/18410	0.00333001	0.0192427	0.014842	DDX11/PIF1/CNBP/LONP1/BLM	5
MF	GO:0098505	G-rich strand telomeric DNA binding	5/2157	10/18410	0.00333001	0.0192427	0.014842	HNRNPA2B1/RPA1/HNRNPA1/NABP2/TERF1	5
MF	GO:0030983	mismatched DNA binding	6/2157	14/18410	0.00334284	0.0192427	0.014842	MSH2/MSH6/PMS2/PCNA/APTX/TDG	6
MF	GO:0043023	ribosomal large subunit binding	6/2157	14/18410	0.00334284	0.0192427	0.014842	DHX33/CPSF6/OLA1/MALSU1/NPM1/EIF6	6
MF	GO:0035064	methylated histone binding	18/2157	78/18410	0.00341631	0.0194168	0.0149762	TTLL12/L3MBTL2/CHD8/CBX1/MSH6/RBBP5/CBX3/MORC4/DPF2/PWP1/NCAPG2/NCAPD3/LRWD1/ING2/SUZ12/TAF7/WDR5/UHRF1	18
MF	GO:0140034	methylation-dependent protein binding	18/2157	78/18410	0.00341631	0.0194168	0.0149762	TTLL12/L3MBTL2/CHD8/CBX1/MSH6/RBBP5/CBX3/MORC4/DPF2/PWP1/NCAPG2/NCAPD3/LRWD1/ING2/SUZ12/TAF7/WDR5/UHRF1	18
MF	GO:0008187	poly-pyrimidine tract binding	9/2157	28/18410	0.00352481	0.0199074	0.0153547	PTBP1/U2AF2/DAZAP1/HNRNPC/KHDRBS1/PNPT1/SSB/HNRNPU/MCRS1	9
MF	GO:0000339	RNA cap binding	7/2157	19/18410	0.00421027	0.0236302	0.0182261	GEMIN5/EIF3D/AGO2/NCBP1/EIF4E/LARP1/SNUPN	7
MF	GO:0046966	nuclear thyroid hormone receptor binding	9/2157	29/18410	0.00458774	0.0254308	0.0196149	MED24/THRAP3/TAF11/MED1/MED30/NSD1/TAF7/NCOA6/ZNHIT3	9
MF	GO:0070717	poly-purine tract binding	9/2157	29/18410	0.00458774	0.0254308	0.0196149	DAZAP1/DDX1/ZC3H14/KHDRBS1/PNPT1/EIF4A3/HNRNPU/LARP4/MCRS1	9
MF	GO:0003714	transcription corepressor activity	35/2157	191/18410	0.00474794	0.0261574	0.0201753	ENO1/RCOR1/HIRA/PRMT5/SNW1/APEX1/TRIB3/PIAS4/EZH2/C1QBP/GMNN/HDAC1/DDX54/NCOA5/MED1/SMARCA4/TRIM28/MYBBP1A/DPF2/HDGF/MTA2/HNRNPU/SRSF2/NSD1/BRD7/SF1/PA2G4/RIOX2/HDAC3/RUVBL2/KMT5A/NOC2L/HMGB1/CNOT7/DAXX	35
MF	GO:0098847	sequence-specific single stranded DNA binding	6/2157	15/18410	0.00502417	0.0275104	0.0212189	HNRNPA2B1/RPA1/HNRNPA1/NABP2/TERF1/HSF1	6
MF	GO:0016273	arginine N-methyltransferase activity	5/2157	11/18410	0.00551959	0.0296802	0.0228925	PRMT5/PRMT1/CARM1/PRMT3/PRMT6	5
MF	GO:0016274	protein-arginine N-methyltransferase activity	5/2157	11/18410	0.00551959	0.0296802	0.0228925	PRMT5/PRMT1/CARM1/PRMT3/PRMT6	5
MF	GO:0032404	mismatch repair complex binding	5/2157	11/18410	0.00551959	0.0296802	0.0228925	MSH2/MSH6/PMS2/MCM8/PCNA	5
MF	GO:0016279	protein-lysine N-methyltransferase activity	14/2157	58/18410	0.00608844	0.0325442	0.0251015	SUV39H1/DOT1L/EZH2/NSD2/RBBP5/EEF2KMT/SMYD5/SUV39H2/NSD1/KMT5A/WDR5/EHMT2/CSKMT/EEF1AKMT4	14
MF	GO:0061631	ubiquitin conjugating enzyme activity	10/2157	36/18410	0.00687176	0.0365139	0.0281633	UBE2T/UBE2R2/UBE2S/UBE2D2/UBE2G1/UBE2Z/UBE2C/UBE2O/UBE2N/UBE2L3	10
MF	GO:0016278	lysine N-methyltransferase activity	14/2157	59/18410	0.00714134	0.0377231	0.029096	SUV39H1/DOT1L/EZH2/NSD2/RBBP5/EEF2KMT/SMYD5/SUV39H2/NSD1/KMT5A/WDR5/EHMT2/CSKMT/EEF1AKMT4	14
MF	GO:0000900	mRNA regulatory element binding translation repressor activity	6/2157	16/18410	0.00725125	0.0378583	0.0292003	PAIP2/CELF1/TYMS/SHMT1/SHMT2/DHFR	6
MF	GO:0005092	GDP-dissociation inhibitor activity	6/2157	16/18410	0.00725125	0.0378583	0.0292003	GDI2/RANBP1/EIF5/GPSM2/ARHGDIA/CHML	6
MF	GO:0018024	histone-lysine N-methyltransferase activity	11/2157	42/18410	0.00756183	0.0392516	0.0302749	SUV39H1/DOT1L/EZH2/NSD2/RBBP5/SMYD5/SUV39H2/NSD1/KMT5A/WDR5/EHMT2	11
MF	GO:0032182	ubiquitin-like protein binding	23/2157	116/18410	0.00773127	0.0399005	0.0307754	SPRTN/USP13/RAE1/USP5/RNF8/AUP1/CKS2/UBA2/ADRM1/TOP2A/PLAA/DCUN1D5/TDG/PELP1/SERBP1/OTUB1/CKS1B/UBXN2A/UBE2N/RAD23A/NPLOC4/FAF1/NUP62	23
MF	GO:0051010	microtubule plus-end binding	7/2157	21/18410	0.00787521	0.0404111	0.0311693	PAFAH1B1/MAPRE1/KIF18A/KNSTRN/KIF2C/CKAP5/DCTN1	7
MF	GO:0000340	RNA 7-methylguanosine cap binding	5/2157	12/18410	0.00855792	0.0431742	0.0333005	GEMIN5/AGO2/NCBP1/EIF4E/LARP1	5
MF	GO:0004526	ribonuclease P activity	5/2157	12/18410	0.00855792	0.0431742	0.0333005	POP1/POP4/RPP40/RPP30/POP7	5
MF	GO:0043047	single-stranded telomeric DNA binding	5/2157	12/18410	0.00855792	0.0431742	0.0333005	HNRNPA2B1/RPA1/HNRNPA1/NABP2/TERF1	5
MF	GO:0051879	Hsp90 protein binding	11/2157	43/18410	0.00910929	0.0456991	0.0352479	PPP5C/AHSA1/CSNK2A1/KPNB1/PTGES3/UNC45A/RPS3/STIP1/PPID/HSF1/NUP62	11
MF	GO:0019001	guanyl nucleotide binding	63/2157	401/18410	0.00928018	0.046042	0.0355124	FKBP4/RALA/LSG1/GNAI3/NOA1/MTIF2/SEPHS1/HSP90AB1/RTCB/MIEF1/EIF5/SRP54/MTG2/GSPT1/GTPBP10/GTPBP4/TUBD1/DRG2/EFTUD2/GPN3/RAB35/HBS1L/MFN2/EIF2B2/ATL2/TUBA1B/RAB22A/IFT22/GNL3L/GTPBP3/EIF2S3/TUBG1/ARFIP2/RAN/EEFSEC/LANCL2/ERAL1/DAP3/GNL2/OLA1/DYNC1LI1/SRPRB/MFHAS1/GTPBP8/GFM2/BMS1/NOLC1/RAB8A/TUBA1C/EEF2/TSR1/NKIRAS2/GFM1/SLC19A1/RAB1B/TUFM/DRG1/TUBB/GPN1/OPA1/NRAS/NME1/RCC1L	63
MF	GO:0032561	guanyl ribonucleotide binding	63/2157	401/18410	0.00928018	0.046042	0.0355124	FKBP4/RALA/LSG1/GNAI3/NOA1/MTIF2/SEPHS1/HSP90AB1/RTCB/MIEF1/EIF5/SRP54/MTG2/GSPT1/GTPBP10/GTPBP4/TUBD1/DRG2/EFTUD2/GPN3/RAB35/HBS1L/MFN2/EIF2B2/ATL2/TUBA1B/RAB22A/IFT22/GNL3L/GTPBP3/EIF2S3/TUBG1/ARFIP2/RAN/EEFSEC/LANCL2/ERAL1/DAP3/GNL2/OLA1/DYNC1LI1/SRPRB/MFHAS1/GTPBP8/GFM2/BMS1/NOLC1/RAB8A/TUBA1C/EEF2/TSR1/NKIRAS2/GFM1/SLC19A1/RAB1B/TUFM/DRG1/TUBB/GPN1/OPA1/NRAS/NME1/RCC1L	63
MF	GO:0005525	GTP binding	60/2157	379/18410	0.00933435	0.0460563	0.0355234	FKBP4/RALA/LSG1/GNAI3/NOA1/MTIF2/SEPHS1/HSP90AB1/RTCB/EIF5/SRP54/MTG2/GSPT1/GTPBP10/GTPBP4/TUBD1/DRG2/EFTUD2/GPN3/RAB35/HBS1L/MFN2/EIF2B2/ATL2/TUBA1B/RAB22A/IFT22/GNL3L/GTPBP3/EIF2S3/TUBG1/ARFIP2/RAN/EEFSEC/LANCL2/ERAL1/DAP3/GNL2/OLA1/SRPRB/MFHAS1/GTPBP8/GFM2/BMS1/NOLC1/RAB8A/TUBA1C/EEF2/TSR1/NKIRAS2/GFM1/RAB1B/TUFM/DRG1/TUBB/GPN1/OPA1/NRAS/NME1/RCC1L	60
MF	GO:0050681	nuclear androgen receptor binding	8/2157	27/18410	0.0100191	0.0491648	0.037921	KDM1A/SNW1/PRPF6/PARK7/SMARCA4/NSD1/CALR/DAXX	8
MF	GO:0008301	DNA binding, bending	6/2157	17/18410	0.0101118	0.0493502	0.038064	HMGB3/TFAM/TOP2A/TERF1/HMGB2/HMGB1	6
MF	GO:0000287	magnesium ion binding	38/2157	222/18410	0.0105009	0.0509722	0.0393151	MTHFD2/ENO1/EXD2/MSH2/SRPK1/GSS/MTG2/IDH3B/GTPBP10/MTPAP/MSH6/FARSB/UBA2/DUT/TOP2A/RAN/FIGNL1/MORC2/TDG/PIF1/PRPSAP2/FOXK2/NT5C3B/ENOPH1/PSPH/PRPS1/PRPSAP1/TKT/NUDT5/HPRT1/PLK1/FEN1/GEN1/DCTPP1/PPA1/PRIM1/OPA1/NME1	38
MF	GO:0042826	histone deacetylase binding	24/2157	126/18410	0.0108864	0.0522957	0.0403359	DDX20/UHRF1BP1/HSP90AA1/TFAP4/HSP90AB1/BRMS1L/YWHAE/GMNN/HDAC1/SFPQ/CDC20/TOP2A/HNRNPD/PARP1/MTA2/NACC1/YWHAB/NUDT21/SP2/HDAC3/BRMS1/KPNA2/HDAC2/SMG5	24
MF	GO:0030544	Hsp70 protein binding	11/2157	44/18410	0.0108901	0.0522957	0.0403359	DNAJA1/ST13/DNAJA3/DNAJC2/DNAJC8/HIKESHI/RPS3/CDK1/PPID/BAG6/NUP62	11
MF	GO:0016538	cyclin-dependent protein serine/threonine kinase regulator activity	12/2157	50/18410	0.0111948	0.0534732	0.0412441	MNAT1/CCNE1/CKS2/CCNB1/CDK4/CCNA2/CCNB2/CCNF/CKS1B/CCNE2/CDK5R1/CCNQ	12
MF	GO:0030331	nuclear estrogen receptor binding	10/2157	39/18410	0.0124181	0.0579433	0.0446919	DDX54/MED1/PCNA/PARP1/MMS19/DCAF13/NSD1/PPID/NCOA6/PHB2	10
MF	GO:0061650	ubiquitin-like protein conjugating enzyme activity	10/2157	39/18410	0.0124181	0.0579433	0.0446919	UBE2T/UBE2R2/UBE2S/UBE2D2/UBE2G1/UBE2Z/UBE2C/UBE2O/UBE2N/UBE2L3	10
MF	GO:0016407	acetyltransferase activity	18/2157	88/18410	0.0125557	0.0579433	0.0446919	MED24/ACAT1/HADHA/GNPNAT1/ACAT2/NAA50/GTF3C4/HAT1/NAT10/BRCA2/NAA30/KAT14/DLAT/NAA15/FASN/ESCO2/NAA20/TAF9	18
MF	GO:0016423	tRNA (guanine) methyltransferase activity	5/2157	13/18410	0.0125823	0.0579433	0.0446919	METTL1/FTSJ1/TRMT5/WDR4/TRMT10C	5
MF	GO:0031386	protein tag	5/2157	13/18410	0.0125823	0.0579433	0.0446919	SUMO1/RPS27A/SUMO3/SUMO2/UBA52	5
MF	GO:0060590	ATPase regulator activity	5/2157	13/18410	0.0125823	0.0579433	0.0446919	GRPEL1/HSPBP1/KATNB1/GRPEL2/BAG5	5
MF	GO:0061575	cyclin-dependent protein serine/threonine kinase activator activity	5/2157	13/18410	0.0125823	0.0579433	0.0446919	MNAT1/CKS2/CCNB1/CKS1B/CDK5R1	5
MF	GO:0003954	NADH dehydrogenase activity	11/2157	45/18410	0.0129254	0.0592192	0.0456761	NDUFS1/NDUFB5/NDUFB9/AIFM1/NDUFS2/NDUFB6/NDUFV1/NDUFA12/NDUFA6/NDUFA4/NDUFS3	11
MF	GO:0035198	miRNA binding	9/2157	34/18410	0.014042	0.0640089	0.0493703	YBX1/ELAVL1/HNRNPA2B1/AGO2/HNRNPA1/PNPT1/TARBP2/DDX21/RBM10	9
MF	GO:0032451	demethylase activity	10/2157	40/18410	0.0148628	0.0674079	0.051992	CYP51A1/KDM1A/JMJD6/KDM2B/ALKBH1/MMACHC/ALKBH4/RIOX1/RIOX2/KDM4D	10
MF	GO:0051537	2 iron, 2 sulfur cluster binding	7/2157	24/18410	0.0171384	0.0769513	0.0593529	CIAPIN1/NDUFS1/FECH/SDHB/CISD2/UQCRFS1/GLRX5	7
MF	GO:0070003	threonine-type peptidase activity	7/2157	24/18410	0.0171384	0.0769513	0.0593529	PSMB1/PSMA4/PSMB5/PSMB2/PSMB7/PSMB6/PSMB4	7
MF	GO:0048487	beta-tubulin binding	10/2157	41/18410	0.0176485	0.0782137	0.0603266	ADNP/EMD/PDCD5/SMC3/VAPB/LRPPRC/CCT5/RACGAP1/TBCA/CDK5R1	10
MF	GO:0003774	cytoskeletal motor activity	21/2157	111/18410	0.0176904	0.0782137	0.0603266	KIF1B/KIF2A/KIF22/KIF4A/KIF3B/SMC3/KIF20A/KIF14/KIF18A/KIF23/KIF11/KIF20B/CENPE/KIF2C/KIF15/KIF18B/KIF24/MYL6B/DYNC1H1/KIFC1/MYO19	21
MF	GO:1990825	sequence-specific mRNA binding	5/2157	14/18410	0.0177154	0.0782137	0.0603266	ETF1/DHX9/SSB/TYMS/DHFR	5
MF	GO:0046982	protein heterodimerization activity	52/2157	332/18410	0.0177679	0.0782137	0.0603266	PAFAH1B1/TAF11/TCOF1/BUD23/TCF3/SMC1A/AURKA/PRMT5/CHRAC1/H2AZ2/TAF6/LSM5/SMC3/MLX/YWHAE/PPP2CA/MACROH2A1/FXR1/CENPA/ATF1/VAPB/PSMF1/UBA2/FXR2/TAF4/TOP2A/RAN/GTF2A2/KATNB1/TAF4B/SAE1/POLE3/PDSS1/QTRT2/NAE1/TAF6L/ATP1A1/H2AZ1/NOLC1/ZHX3/TAF7/RCC1/IRAK1/HSF1/KATNA1/H2AX/FZD9/SUPT5H/CENPW/CHUK/PHB2/TAF9	52
MF	GO:0015453	oxidoreduction-driven active transmembrane transporter activity	15/2157	72/18410	0.0183259	0.0802765	0.0619176	NDUFS1/COX7A2L/NDUFB5/NDUFB9/NDUFS2/NDUFB6/NDUFV1/UQCRFS1/UQCRH/COX5A/CYC1/NDUFA12/NDUFA6/NDUFA4/NDUFS3	15
MF	GO:0008137	NADH dehydrogenase (ubiquinone) activity	10/2157	42/18410	0.0208007	0.0906747	0.0699378	NDUFS1/NDUFB5/NDUFB9/NDUFS2/NDUFB6/NDUFV1/NDUFA12/NDUFA6/NDUFA4/NDUFS3	10
MF	GO:0001094	TFIID-class transcription factor complex binding	4/2157	10/18410	0.0220427	0.0933694	0.0720162	NOP58/FBL/RUVBL1/RUVBL2	4
MF	GO:0008097	5S rRNA binding	4/2157	10/18410	0.0220427	0.0933694	0.0720162	MRPL18/RPL5/RRS1/RPF2	4
MF	GO:0008190	eukaryotic initiation factor 4E binding	4/2157	10/18410	0.0220427	0.0933694	0.0720162	ANGEL1/EIF4G1/LARP1/EIF4EBP1	4
MF	GO:0016783	sulfurtransferase activity	4/2157	10/18410	0.0220427	0.0933694	0.0720162	TRMU/MOCS3/CTU2/NFS1	4
MF	GO:0030957	Tat protein binding	4/2157	10/18410	0.0220427	0.0933694	0.0720162	DNAJA1/SMARCB1/SMARCA4/NPM1	4
MF	GO:0036435	K48-linked polyubiquitin modification-dependent protein binding	4/2157	10/18410	0.0220427	0.0933694	0.0720162	UFD1/UBQLN4/VCP/NPLOC4	4
MF	GO:0000979	RNA polymerase II core promoter sequence-specific DNA binding	6/2157	20/18410	0.0233094	0.0982717	0.0757974	EZH2/TBP/MACROH2A1/HDAC1/H2AZ1/RUVBL2	6
KEGG	hsa03040	Spliceosome	80/1012	147/8164	3.37604e-35	1.02632e-32	8.99093e-33	THOC3/SNRNP40/U2AF2/DHX8/SNRPA/WBP11/CHERP/RBM22/SF3B2/FUS/HNRNPC/CDC5L/HNRNPM/SF3A1/SNRPD3/SNU13/PHF5A/SNW1/PRPF6/CRNKL1/PQBP1/PRPF31/BUD31/LSM5/EFTUD2/DHX15/HSPA8/PRPF19/MAGOHB/SRSF9/SRSF3/SF3B6/SRSF7/BCAS2/SMNDC1/SNRPC/SNRPD2/SNRPB/SNRPB2/LSM4/SNRPA1/CTNNBL1/PRPF38A/HNRNPA1/SRSF1/TRA2B/PRPF4/NCBP1/PPIL1/SNRPF/EIF4A3/TXNL4A/SNRPG/SNRNP200/DDX46/ZMAT2/RBMX/HNRNPU/SRSF2/MAGOH/RP9/HNRNPK/SNRPD1/US…	80
KEGG	hsa03013	Nucleocytoplasmic transport	59/1012	108/8164	2.63942e-26	4.01192e-24	3.5146e-24	UPF1/NUP160/THOC3/NDC1/TNPO3/IPO5/NUP133/NUP37/XPO1/TNPO1/SEH1L/IPO11/NUP50/AAAS/NUP188/THOC5/RANGAP1/RAE1/NUP93/TNPO2/CASC3/KPNB1/NUP88/NUP98/MAGOHB/NUP107/NUP155/SUMO1/IPO13/GLE1/CSE1L/XPO5/NUP153/UPF3B/NUP85/XPO7/RAN/NXT1/NCBP1/NUP54/EIF4A3/AHCTF1/NUP205/MAGOH/NUP35/PHAX/XPO6/SNUPN/KPNA2/ALYREF/XPOT/SUMO3/SUMO2/IPO9/IPO7/RNPS1/NUP62/RBM8A/POM121C	59
KEGG	hsa04110	Cell cycle	64/1012	126/8164	4.58299e-26	4.64409e-24	4.0684e-24	CDC27/DBF4/E2F2/CUL1/SMC1A/MCM2/MCM6/RBL1/ORC1/ANAPC5/ORC6/CDC45/CDC6/CDC23/CDC7/MCM5/CDC25B/E2F1/MCM4/CCNE1/FZR1/SMC3/YWHAE/ANAPC15/MCM3/TTK/HDAC1/MAD2L2/CDC20/STAG1/PKMYT1/PCNA/CCNB1/CDK7/YWHAQ/ORC3/CDK4/ESPL1/MYC/CCNA2/CHEK1/ANAPC1/BUB1B/CCNB2/CDC25C/CDC25A/MAD2L1/PTTG1/RAD21/ORC5/YWHAZ/MCM7/PLK1/YWHAB/BUB1/YWHAG/CDK1/CCNE2/CDC26/CHEK2/ANAPC7/HDAC2/TFDP1/PRKDC	64
KEGG	hsa05014	Amyotrophic lateral sclerosis	110/1012	364/8164	1.80027e-20	1.3682e-18	1.1986e-18	NDUFAB1/PSMB1/PSMC4/NDUFS1/NUP160/PSMA4/HSPA5/NDC1/NUP133/NUP37/SEH1L/FUS/NUP50/NUP188/ITPR3/PSMD8/PSMC6/PSMA3/PSMC1/PSMB5/RAE1/PSMA7/NUP93/PSMD7/PSMD3/NUP88/PSMD11/NUP98/ATP5F1B/NUP107/SRSF3/NUP155/PSMD14/SRSF7/COX7A2L/ATP5PB/SDHB/GLE1/TARDBP/HNRNPA2B1/ATG101/TUBA1B/VAPB/NUP153/NUP85/PSMB2/TOMM40/ADRM1/NXT1/EIF2S1/UBQLN1/HNRNPA1/NDUFB5/PSMB7/NCBP1/DERL1/DCTN3/NUP54/SOD1/PSMB6/PSMA5/SDHC/NDUFB11/…	110
KEGG	hsa03050	Proteasome	30/1012	46/8164	5.83604e-17	3.54831e-15	3.10846e-15	PSMB1/PSMC4/PSMA4/PSME4/PSMD8/PSMC6/PSMA3/PSMC1/PSMB5/PSMA7/PSMD7/PSMD3/PSMD11/PSMD14/PSMF1/PSMB2/ADRM1/PSME3/POMP/PSMB7/PSMB6/PSMA5/PSMD4/PSMB4/PSMC2/PSMC3/PSMD1/PSMD2/PSMD13/PSMD12	30
KEGG	hsa03008	Ribosome biogenesis in eukaryotes	48/1012	109/8164	1.32595e-16	6.40008e-15	5.60672e-15	UTP18/LSG1/NOP58/RIOK2/WDR3/TCOF1/XPO1/XRN2/SNU13/CSNK2A1/NOP56/POP1/POP4/FBL/RBM28/GTPBP4/UTP6/GAR1/WDR75/HEATR1/FCF1/RCL1/RIOK1/RPP40/EMG1/GNL3L/DKC1/RAN/NXT1/GNL2/WDR36/NAT10/IMP4/UTP4/NOB1/NVL/SPATA5/NHP2/RPP30/UTP14A/WDR43/UTP15/NOL6/BMS1/POP7/TBL3/RRP7A/EIF6	48
KEGG	hsa03030	DNA replication	26/1012	36/8164	1.4737e-16	6.40008e-15	5.60672e-15	RFC2/POLD1/MCM2/MCM6/POLD3/MCM5/POLE2/POLA1/MCM4/LIG1/SSBP1/RPA3/POLD2/RFC5/MCM3/RPA1/PCNA/RFC3/DNA2/PRIM2/POLE3/RFC4/MCM7/FEN1/POLE/PRIM1	26
KEGG	hsa05012	Parkinson disease	77/1012	266/8164	1.76169e-13	6.69442e-12	5.86458e-12	NDUFAB1/SLC25A5/PSMB1/PSMC4/NDUFS1/PSMA4/HSPA5/GNAI3/VDAC3/KEAP1/ITPR3/PSMD8/PSMC6/PSMA3/PSMC1/PSMB5/PSMA7/PSMD7/PSMD3/PSMD11/ATP5F1B/PSMD14/HTRA2/COX7A2L/PARK7/ATP5PB/MFN2/SDHB/TUBA1B/PSMB2/TRAP1/ADRM1/UBA1/UBE2G1/EIF2S1/NDUFB5/PSMB7/SOD1/PSMB6/PSMA5/SDHC/CALM2/RPS27A/NDUFB11/NDUFB9/ATP5F1A/ATP5MC3/NDUFS2/ATP5MC1/PSMD4/PSMB4/PSMC2/NDUFB6/ATP5F1C/VDAC2/PSMC3/TUBA1C/NDUFV1/UQCRFS1/CYCS/UQCRH/PSMD1…	77
KEGG	hsa03010	Ribosome	54/1012	158/8164	6.17987e-13	2.08742e-11	1.82866e-11	RPL26L1/MRPS10/MRPL22/RPS5/RPLP0/MRPS18A/RPS16/MRPL4/MRPL32/MRPL18/RPS12/MRPL3/MRPL19/MRPS14/MRPS2/RPL5/MRPS7/MRPS12/RPL27/MRPL35/MRPS9/MRPL15/RSL24D1/MRPL9/RPS27A/MRPS5/RPL7/RPS3/MRPL17/MRPL10/RPL8/MRPL16/MRPL1/MRPL36/RPS21/RPS7/MRPL13/MRPL11/MRPL14/MRPS11/MRPS16/RPL35A/MRPL30/MRPL21/RPS4X/RPL23A/RPL10A/RPS29/UBA52/RPL41/MRPS17/MRPL20/MRPL33/RPL17	54
KEGG	hsa05016	Huntington disease	82/1012	306/8164	2.73633e-12	8.31845e-11	7.28728e-11	NDUFAB1/SLC25A5/PSMB1/PSMC4/NDUFS1/PSMA4/AP2S1/VDAC3/RCOR1/PSMD8/POLR2E/POLR2F/PSMC6/PSMA3/PSMC1/PSMB5/PSMA7/PSMD7/NRF1/TFAM/PSMD3/PSMD11/ATP5F1B/TBP/PSMD14/COX7A2L/ATP5PB/HDAC1/SDHB/ATG101/TUBA1B/PSMB2/TAF4/ADRM1/NDUFB5/PSMB7/DCTN3/TAF4B/SOD1/PSMB6/PSMA5/SDHC/POLR2D/NDUFB11/NDUFB9/ATP5F1A/ATP5MC3/WIPI2/NDUFS2/ATP5MC1/PSMD4/PSMB4/PSMC2/POLR2H/NDUFB6/ATP5F1C/VDAC2/PSMC3/TUBA1C/NDUFV1/POLR2G/UQCRFS…	82
KEGG	hsa03015	mRNA surveillance pathway	39/1012	97/8164	3.37083e-12	9.31574e-11	8.16095e-11	UPF1/DAZAP1/CPSF1/FUS/CSTF1/CSTF2/GSPT1/CASC3/MAGOHB/CPSF6/HBS1L/PPP2R5D/PPP2CA/SMG7/CPSF3/GLE1/ETF1/TARDBP/UPF3B/SYMPK/NXT1/NCBP1/EIF4A3/FIP1L1/CPSF7/PPP2R5E/SSU72/CPSF4/MAGOH/CPSF2/NUDT21/CLP1/PPP1CA/CSTF3/ALYREF/PPP1CC/SMG5/RNPS1/RBM8A	39
KEGG	hsa00970	Aminoacyl-tRNA biosynthesis	30/1012	66/8164	2.71269e-11	6.87215e-10	6.02027e-10	LARS2/SARS1/KARS1/IARS2/AARS1/EARS2/GARS1/CARS1/TARS1/RARS1/FARSB/DARS2/AARS2/QRSL1/LARS1/NARS1/YARS1/EPRS1/NARS2/YARS2/TARS2/FARS2/PARS2/MARS1/HARS1/FARSA/IARS1/VARS1/MARS2/GATC	30
KEGG	hsa03410	Base excision repair	20/1012	33/8164	7.18753e-11	1.68078e-09	1.47243e-09	POLD1/NTHL1/XRCC1/UNG/POLD3/POLE2/APEX1/LIG1/POLD2/NEIL3/MBD4/PARP2/PCNA/TDG/PARP1/POLE3/FEN1/APEX2/POLE/HMGB1	20
KEGG	hsa03420	Nucleotide excision repair	24/1012	47/8164	1.27513e-10	2.76886e-09	2.42563e-09	MNAT1/ERCC8/RFC2/POLD1/POLD3/POLE2/ERCC2/LIG1/RPA3/POLD2/GTF2H3/RFC5/RPA1/PCNA/RFC3/CDK7/CUL4A/POLE3/ERCC3/RFC4/DDB1/POLE/RAD23A/GTF2H2C	24
KEGG	hsa03430	Mismatch repair	16/1012	23/8164	2.91984e-10	5.91754e-09	5.18399e-09	RFC2/POLD1/POLD3/MSH2/LIG1/SSBP1/RPA3/POLD2/RFC5/MSH6/PMS2/RPA1/PCNA/RFC3/RFC4/EXO1	16
KEGG	hsa03020	RNA polymerase	19/1012	34/8164	1.4983e-09	2.84676e-08	2.49388e-08	POLR3B/POLR1A/POLR2E/POLR2F/POLR3H/POLR1F/POLR3G/POLR1G/POLR1B/POLR3F/POLR1E/POLR2D/POLR3A/POLR3K/POLR2H/POLR2G/POLR3D/POLR3C/CRCP	19
KEGG	hsa03440	Homologous recombination	21/1012	41/8164	1.7319e-09	3.09704e-08	2.71313e-08	BRCA1/MRE11/RAD51/POLD1/POLD3/PALB2/RAD54L/SSBP1/RPA3/POLD2/RAD51C/RPA1/BRIP1/BRCA2/EME1/TOPBP1/TOP3A/RAD51D/BRCC3/XRCC2/BLM	21
KEGG	hsa04114	Oocyte meiosis	42/1012	131/8164	2.23798e-09	3.7797e-08	3.31116e-08	CDC27/CUL1/SMC1A/AURKA/ANAPC5/CDC23/ITPR3/CCNE1/SMC3/YWHAE/ANAPC15/FBXO5/PPP2R5D/PPP2CA/MAD2L2/CDC20/PKMYT1/SGO1/CCNB1/YWHAQ/ESPL1/ADCY3/CALM2/ANAPC1/PPP2R5E/CCNB2/CDC25C/MAD2L1/PTTG1/YWHAZ/PLK1/YWHAB/MAP2K1/BUB1/YWHAG/CDK1/PPP1CA/CCNE2/CDC26/PPP1CC/ANAPC7/PPP3R1	42
KEGG	hsa03460	Fanconi anemia pathway	24/1012	54/8164	4.67412e-09	7.47859e-08	6.55153e-08	BRCA1/RAD51/UBE2T/PALB2/RPA3/RAD51C/FANCE/PMS2/FAAP24/RPA1/BRIP1/BRCA2/FANCI/FANCD2/EME1/FANCC/USP1/ATRIP/CENPX/TOP3A/FANCB/FANCA/FANCM/BLM	24
KEGG	hsa05020	Prion disease	68/1012	273/8164	6.23721e-09	9.48056e-08	8.30533e-08	NDUFAB1/SLC25A5/PSMB1/PSMC4/NDUFS1/PSMA4/HSPA5/VDAC3/ITPR3/PSMD8/PSMC6/PSMA3/PSMC1/PSMB5/PSMA7/CSNK2A1/PSMD7/PSMD3/PSMD11/HSPA8/ATP5F1B/PSMD14/COX7A2L/ATP5PB/SDHB/TUBA1B/PSMB2/ADRM1/EIF2S1/NDUFB5/PSMB7/SOD1/PSMB6/PSMA5/SDHC/NDUFB11/NDUFB9/ATP5F1A/ATP5MC3/NDUFS2/ATP5MC1/PSMD4/PSMB4/PSMC2/NDUFB6/ATP5F1C/VDAC2/PSMC3/TUBA1C/NDUFV1/STIP1/UQCRFS1/CYCS/UQCRH/PSMD1/KLC2/PSMD2/COX5A/CYC1/NDUFA12/NDUFA6/PS…	68
KEGG	hsa03022	Basal transcription factors	21/1012	45/8164	1.48502e-08	2.14974e-07	1.88326e-07	MNAT1/TAF2/TAF11/ERCC2/TAF6/GTF2H3/TBP/GTF2F1/TAF4/CDK7/TAF5L/GTF2A2/TAF4B/TAF5/GTF2E1/TAF6L/ERCC3/TAF7/GTF2H2C/GTF2E2/TAF9	21
KEGG	hsa05022	Pathways of neurodegeneration - multiple diseases	100/1012	476/8164	3.26551e-08	4.51234e-07	3.95299e-07	NDUFAB1/DVL2/SLC25A5/PSMB1/PSMC4/NDUFS1/PSMA4/HSPA5/HSD17B10/VDAC3/FUS/ITPR3/PSMD8/PSMC6/PSMA3/PSMC1/PSMB5/PSMA7/CSNK2A1/PSMD7/AXIN1/PSMD3/PSMD11/ATP5F1B/PSMD14/HTRA2/COX7A2L/PARK7/ATP5PB/MFN2/SDHB/TARDBP/ATG101/TUBA1B/VAPB/PSMB2/TRAP1/TOMM40/ADRM1/UBA1/UBE2G1/EIF2S1/NDUFB5/PSMB7/DERL1/DCTN3/SOD1/PSMB6/PSMA5/SDHC/CALM2/RPS27A/NDUFB11/NDUFB9/SIGMAR1/ATP5F1A/ATP5MC3/WIPI2/NDUFS2/ATP5MC1/PSMD4/PSMB4…	100
KEGG	hsa05017	Spinocerebellar ataxia	42/1012	143/8164	4.01292e-08	5.30403e-07	4.64654e-07	SLC25A5/PSMB1/PSMC4/PSMA4/VDAC3/ITPR3/PSMD8/PSMC6/PSMA3/PSMC1/PSMB5/PSMA7/NOP56/PSMD7/AKT2/TWNK/PSMD3/PSMD11/TBP/PSMD14/ATG101/PSMB2/ATXN10/ADRM1/PSMB7/AFG3L2/PSMB6/PSMA5/WIPI2/PSMD4/PSMB4/PSMC2/VDAC2/PSMC3/CYCS/PSMD1/PSMD2/PSMD13/PSMD12/MTOR/OPA1/VDAC1	42
KEGG	hsa00020	Citrate cycle (TCA cycle)	16/1012	30/8164	7.38637e-08	9.35607e-07	8.19628e-07	MDH1/CS/DLD/FH/ACO2/IDH3B/OGDH/SDHB/DLST/ACLY/PDHA1/SDHC/MDH2/DLAT/SUCLG1/PC	16
KEGG	hsa05010	Alzheimer disease	80/1012	384/8164	1.20048e-06	1.45978e-05	1.27882e-05	NDUFAB1/DVL2/SLC25A5/PSMB1/PSMC4/NDUFS1/PSMA4/HSD17B10/VDAC3/ITPR3/PSMD8/PSMC6/PSMA3/PSMC1/PSMB5/PSMA7/CSNK2A1/PSMD7/AXIN1/AKT2/PSMD3/PSMD11/ATP5F1B/GAPDH/PSMD14/COX7A2L/ATP5PB/SDHB/ATG101/TUBA1B/PSMB2/ADRM1/EIF2S1/NDUFB5/PSMB7/PSMB6/PSMA5/SDHC/CALM2/NDUFB11/NDUFB9/ATP5F1A/ATP5MC3/WIPI2/NDUFS2/ATP5MC1/PSMD4/PSMB4/NAE1/PSMC2/NDUFB6/ATP5F1C/VDAC2/PSMC3/TUBA1C/NDUFV1/UQCRFS1/MAP2K1/PPID/CYCS/UQCRH/P…	80
KEGG	hsa01200	Carbon metabolism	33/1012	115/8164	2.02656e-06	2.36951e-05	2.07579e-05	MDH1/CS/ENO1/ACAT1/DLD/FH/ACO2/IDH3B/PGK1/GPI/OGDH/GAPDH/TPI1/PCCB/SDHB/DLST/GOT1/ACAT2/ACSS2/PDHA1/PSAT1/SDHC/MDH2/PSPH/PRPS1/DLAT/PFKM/SUCLG1/TKT/PGAM1/PC/SHMT1/SHMT2	33
KEGG	hsa04120	Ubiquitin mediated proteolysis	38/1012	142/8164	2.31499e-06	2.6065e-05	2.2834e-05	CDC27/UBE3C/BRCA1/ERCC8/CUL1/ITCH/KEAP1/HUWE1/ANAPC5/CDC23/PIAS4/FZR1/UBE2R2/CUL2/UBE2S/PRPF19/ANAPC15/CDC20/UBA2/UBE2M/UBA1/UBE2D2/UBE2G1/CUL4A/SAE1/RPS27A/ANAPC1/ELOC/UBE2Z/DDB1/UBE2C/UBE2O/CDC26/UBE2N/UBOX5/UBE2L3/ANAPC7/UBA52	38
KEGG	hsa04914	Progesterone-mediated oocyte maturation	28/1012	102/8164	2.94662e-05	0.000319919	0.000280261	CDC27/GNAI3/KIF22/HSP90AA1/AURKA/ANAPC5/CDC23/HSP90AB1/CDC25B/AKT2/FZR1/ANAPC15/MAD2L2/PKMYT1/CCNB1/ADCY3/CCNA2/ANAPC1/CCNB2/CDC25C/CDC25A/MAD2L1/PLK1/MAP2K1/BUB1/CDK1/CDC26/ANAPC7	28
KEGG	hsa03018	RNA degradation	23/1012	79/8164	5.50613e-05	0.000577195	0.000505645	MTREX/ENO1/EXOSC5/CNOT3/XRN2/LSM5/EXOSC3/HSPA9/TENT4B/EXOSC9/LSM4/EXOSC2/PNPT1/HSPD1/CNOT9/PFKM/EXOSC10/EXOSC4/EDC3/CNOT10/CNOT7/SKIV2L/LSM2	23
KEGG	hsa00630	Glyoxylate and dicarboxylate metabolism	12/1012	30/8164	0.000125328	0.00126999	0.00111256	MDH1/CS/ACAT1/DLD/ACO2/PCCB/ACAT2/ACSS2/GRHPR/MDH2/SHMT1/SHMT2	12
KEGG	hsa04714	Thermogenesis	48/1012	232/8164	0.000200235	0.00193135	0.00169193	KDM1A/NDUFAB1/COX10/DPF1/NDUFS1/SMARCD1/SMARCB1/COA1/SMARCD2/ATP5F1B/COX7A2L/ATP5PB/SDHB/NDUFAF4/SMARCA4/ACTL6A/NDUFB5/ADCY3/RPTOR/SDHC/NDUFB11/NDUFB9/ATP5F1A/ATP5MC3/NDUFAF6/NDUFS2/ATP5MC1/COA7/NDUFAF2/NDUFB6/ATP5F1C/COX11/NDUFV1/MLST8/UQCRFS1/UQCRH/RPS6KB2/COX5A/CYC1/COA4/PRKAG1/ACTG1/NDUFA12/NDUFA6/NDUFA4/MTOR/NRAS/NDUFS3	48
KEGG	hsa04141	Protein processing in endoplasmic reticulum	38/1012	171/8164	0.0002033	0.00193135	0.00169193	HSPA5/CUL1/UFD1/HSP90AA1/DNAJA1/EIF2AK1/EDEM2/GANAB/DNAJB11/HSP90AB1/DNAJC5/SEC23B/HSPA8/SSR3/RPN2/CANX/PRKCSH/UBE2D2/UBE2G1/SEC61G/HSPBP1/EIF2S1/STT3A/UBQLN1/DERL1/PLAA/PREB/PDIA6/HYOU1/UBQLN4/RPN1/VCP/HSP90B1/UBXN2A/CALR/RAD23A/NPLOC4/DDOST	38
KEGG	hsa00670	One carbon pool by folate	9/1012	20/8164	0.000312122	0.00287531	0.00251888	MTHFD2/MTHFD1/MTHFD1L/ATIC/GART/TYMS/SHMT1/SHMT2/DHFR	9
KEGG	hsa00190	Oxidative phosphorylation	31/1012	134/8164	0.000365416	0.00326725	0.00286224	NDUFAB1/COX10/NDUFS1/ATP5F1B/COX7A2L/ATP5PB/SDHB/ATP6V0B/NDUFB5/SDHC/NDUFB11/NDUFB9/ATP5F1A/ATP5MC3/ATP6V1C1/NDUFS2/ATP5MC1/NDUFB6/ATP5F1C/COX11/NDUFV1/UQCRFS1/CYCS/UQCRH/COX5A/CYC1/PPA1/NDUFA12/NDUFA6/NDUFA4/NDUFS3	31
KEGG	hsa00240	Pyrimidine metabolism	17/1012	58/8164	0.000462087	0.00401356	0.00351603	CAD/DHODH/UMPS/DUT/NT5C3B/UCK2/RRM1/TK1/DTYMK/CANT1/CTPS1/RRM2/TYMS/DCTPP1/ENTPD6/UCKL1/NME1	17
KEGG	hsa04218	Cellular senescence	34/1012	156/8164	0.000626878	0.00529364	0.00463743	SLC25A5/E2F2/MRE11/VDAC3/RBL1/ITPR3/MYBL2/E2F1/CCNE1/AKT2/FOXM1/RAD1/CCNB1/CDK4/MYC/CALM2/CCNA2/CHEK1/CCNB2/CDC25A/VDAC2/MAP2K1/CDK1/PPID/PPP1CA/CCNE2/CHEK2/LIN9/PPP1CC/EIF4EBP1/MTOR/NRAS/VDAC1/PPP3R1	34
KEGG	hsa00620	Pyruvate metabolism	14/1012	47/8164	0.00120869	0.00993088	0.00869983	MDH1/ACAT1/DLD/FH/ACAT2/GLO1/ACSS2/PDHA1/LDHA/GRHPR/MDH2/DLAT/PC/ACACA	14
KEGG	hsa01232	Nucleotide metabolism	21/1012	85/8164	0.00129397	0.0103517	0.00906853	AK2/ITPA/DUT/NT5C3B/UCK2/ADK/GMPS/HPRT1/RRM1/TK1/DTYMK/CANT1/CTPS1/RRM2/TYMS/IMPDH2/DCTPP1/ENTPD6/UCKL1/PNP/NME1	21
KEGG	hsa01230	Biosynthesis of amino acids	19/1012	75/8164	0.00157654	0.0122889	0.0107656	ALDH18A1/CS/ENO1/ACO2/IDH3B/PGK1/PYCR3/GAPDH/TPI1/GOT1/PSAT1/PSPH/PRPS1/PFKM/TKT/PGAM1/PC/SHMT1/SHMT2	19
KEGG	hsa01240	Biosynthesis of cofactors	32/1012	153/8164	0.00183655	0.0139578	0.0122276	AK2/COX10/MTHFD2/FECH/COASY/CPOX/CAD/DLD/PMM1/MTHFD1/GSS/DHODH/EARS2/UMPS/MTHFD1L/PANK2/COQ3/PSAT1/EPRS1/GGH/MMAB/FLAD1/GPHN/CTPS1/COQ2/SHMT1/SHMT2/VKORC1L1/DHFR/NME1/NFS1/HMBS	32
KEGG	hsa03450	Non-homologous end-joining	6/1012	13/8164	0.00282851	0.0209724	0.0183726	MRE11/XRCC5/XRCC4/FEN1/XRCC6/PRKDC	6
KEGG	hsa03060	Protein export	8/1012	23/8164	0.00478623	0.0346432	0.0303488	HSPA5/SRP54/SEC61G/SRPRB/OXA1L/SEC11C/SRP68/SRP72	8
KEGG	hsa05166	Human T-cell leukemia virus 1 infection	41/1012	222/8164	0.0052904	0.0374019	0.0327655	CDC27/SLC25A5/E2F2/TCF3/VDAC3/XPO1/ANAPC5/CDC23/RANBP1/E2F1/CCNE1/AKT2/ANAPC15/TBP/CDC20/ELK1/CANX/RAN/CDK4/ESPL1/MYC/ADCY3/CCNA2/CHEK1/ANAPC1/BUB1B/CCNB2/FDPS/MAD2L1/PTTG1/VDAC2/MAP2K1/CCNE2/CDC26/CALR/CHEK2/ANAPC7/NRAS/CHUK/VDAC1/PPP3R1	41
KEGG	hsa01523	Antifolate resistance	9/1012	30/8164	0.00844179	0.0583251	0.051095	GGH/ATIC/GART/SLC19A1/TYMS/SHMT1/SHMT2/CHUK/DHFR	9
KEGG	hsa05415	Diabetic cardiomyopathy	37/1012	203/8164	0.00965188	0.0652038	0.0571211	NDUFAB1/SLC25A5/NDUFS1/VDAC3/GYS1/AKT2/ATP5F1B/GAPDH/COX7A2L/ATP5PB/SDHB/PDHA1/NDUFB5/SDHC/PARP1/NDUFB11/NDUFB9/ATP5F1A/ATP5MC3/NDUFS2/ATP5MC1/NDUFB6/ATP5F1C/VDAC2/NDUFV1/UQCRFS1/PPP1CA/UQCRH/COX5A/CYC1/NDUFA12/NDUFA6/PPP1CC/NDUFA4/MTOR/VDAC1/NDUFS3	37
KEGG	hsa00563	Glycosylphosphatidylinositol (GPI)-anchor biosynthesis	8/1012	26/8164	0.010879	0.0718958	0.0629835	PIGS/PIGH/PIGU/PIGT/PIGX/PIGO/GPAA1/PIGW	8
